# Supplementary material for: Chemoproteomic profiling of kinases in live cells using electrophilic sulfonyl triazole probes
Source: Chem Sci. 2021 Jan 21;12(9):3295–307. doi: 10.1039/d0sc06623k (PMC8179411; doi:10.1039/d0sc06623k)
Supplement: SC-012-D0SC06623K-s002 [file SC-012-D0SC06623K-s002.xlsx]

## Sheet: TH211_Y_sol_hDGKA_HEK
site	Ratio	Std	uni	treatment
A0AVT1_710	20	NA	A0AVT1	TH211Y
A6NHR9_132	20	NA	A6NHR9	TH211Y
O00154_162	20	NA	O00154	TH211Y
O00154_194	20	0	O00154	TH211Y
O00193_84	20	NA	O00193	TH211Y
O00299_214	20	0	O00299	TH211Y
O00299_233	20	NA	O00299	TH211Y
O00303_157	20	7.29915	O00303	TH211Y
O00487_234	20	0	O00487	TH211Y
O00743_123	20	0	O00743	TH211Y
O14654_1038	20	0	O14654	TH211Y
O14654_743	20	0	O14654	TH211Y
O14654_899	20	0	O14654	TH211Y
O14744_307	20	0	O14744	TH211Y
O14744_324	20	NA	O14744	TH211Y
O14802_136	20	NA	O14802	TH211Y
O14818_118	20	5.7879	O14818	TH211Y
O14818_153	20	3.83336	O14818	TH211Y
O14981_1465	20	NA	O14981	TH211Y
O15111_580	20	NA	O15111	TH211Y
O15160_33	20	NA	O15160	TH211Y
O15355_160	20	0	O15355	TH211Y
O15355_211	20	NA	O15355	TH211Y
O15397_30	20	NA	O15397	TH211Y
O15530_524	20	NA	O15530	TH211Y
O43172_343	20	NA	O43172	TH211Y
O43252_232	20	0	O43252	TH211Y
O43252_30	20	5.96263	O43252	TH211Y
O43252_388	20	NA	O43252	TH211Y
O43390_208	20	0	O43390	TH211Y
O43390_436	20	NA	O43390	TH211Y
O43488_237	20	NA	O43488	TH211Y
O43488_260	20	NA	O43488	TH211Y
O43684_53	20	NA	O43684	TH211Y
O43684_65	20	0	O43684	TH211Y
O43765_127	20	NA	O43765	TH211Y
O43765_141	20	NA	O43765	TH211Y
O43809_24	20	0	O43809	TH211Y
O43823_80	20	0	O43823	TH211Y
O43837_171	20	0	O43837	TH211Y
O43852_106	20	1.05535	O43852	TH211Y
O43865_514	20	NA	O43865	TH211Y
O60264_712	20	NA	O60264	TH211Y
O60271_518	20	0	O60271	TH211Y
O60506_205	20	9.56341	O60506	TH211Y
O60506_293	20	7.69115	O60506	TH211Y
O60610_773	20	NA	O60610	TH211Y
O60701_473	20	NA	O60701	TH211Y
O60934_74	20	NA	O60934	TH211Y
O75155_912	20	NA	O75155	TH211Y
O75369_596	20	NA	O75369	TH211Y
O75390_345	20	7.72503	O75390	TH211Y
O75521_195	20	NA	O75521	TH211Y
O75533_119	20	NA	O75533	TH211Y
O94776_437	20	5.11315	O94776	TH211Y
O94776_483	20	9.22978	O94776	TH211Y
O94808_35	20	NA	O94808	TH211Y
O94822_1514	20	NA	O94822	TH211Y
O94906_446	20	0	O94906	TH211Y
O94925_308	20	0	O94925	TH211Y
O94925_370	20	NA	O94925	TH211Y
O95163_1182	20	5.67121	O95163	TH211Y
O95166_25	20	0	O95166	TH211Y
O95376_337	20	NA	O95376	TH211Y
O95376_343	20	NA	O95376	TH211Y
O95376_467	20	0	O95376	TH211Y
O95433_333	20	10.3115	O95433	TH211Y
O95835_861	20	0	O95835	TH211Y
O95881_137	20	0	O95881	TH211Y
O95983_52	20	0	O95983	TH211Y
O96019_186	20	10.744	O96019	TH211Y
P00492_105	20	NA	P00492	TH211Y
P00505_179	20	0	P00505	TH211Y
P00505_284	20	0	P00505	TH211Y
P00966_402	20	NA	P00966	TH211Y
P04080_97	20	1.77513	P04080	TH211Y
P04181_280	20	0	P04181	TH211Y
P04181_323	20	NA	P04181	TH211Y
P04183_61	20	0	P04183	TH211Y
P04350_106	20	0.240277	P04350	TH211Y
P04350_50	20	0	P04350	TH211Y
P04350_59	20	4.12057	P04350	TH211Y
P04406_276	20	NA	P04406	TH211Y
P04406_320	20	1.53556	P04406	TH211Y
P06493_286	20	NA	P06493	TH211Y
P06576_331	20	5.09371	P06576	TH211Y
P06576_418	20	0	P06576	TH211Y
P06576_431	20	0	P06576	TH211Y
P06737_732	20	NA	P06737	TH211Y
P06748_29	20	7.29873	P06748	TH211Y
P07237_99	20	8.5722	P07237	TH211Y
P07437_208	20	5.81099	P07437	TH211Y
P07437_281	20	0	P07437	TH211Y
P07437_59	20	0	P07437	TH211Y
P07814_1127	20	0	P07814	TH211Y
P07814_1130	20	10.293	P07814	TH211Y
P07900_309	20	NA	P07900	TH211Y
P07900_466	20	NA	P07900	TH211Y
P07900_604	20	4.35729	P07900	TH211Y
P08238_301	20	0	P08238	TH211Y
P08238_305	20	1.07209	P08238	TH211Y
P08238_472	20	4.20933	P08238	TH211Y
P08238_485	20	0	P08238	TH211Y
P08243_555	20	10.3632	P08243	TH211Y
P08559_118	20	9.89107	P08559	TH211Y
P08559_227	20	7.58804	P08559	TH211Y
P08559_301	20	NA	P08559	TH211Y
P08670_291	20	NA	P08670	TH211Y
P08758_148	20	NA	P08758	TH211Y
P08865_156	20	0	P08865	TH211Y
P09211_80	20	0	P09211	TH211Y
P09651_167	20	0	P09651	TH211Y
P09651_347	20	0	P09651	TH211Y
P09651_357	20	0	P09651	TH211Y
P09651_366	20	0	P09651	TH211Y
P09874_310	20	NA	P09874	TH211Y
P09874_775	20	3.39312	P09874	TH211Y
P09874_794	20	0	P09874	TH211Y
P09960_131	20	NA	P09960	TH211Y
P09960_589	20	10.3161	P09960	TH211Y
P0DMV8_431	20	0	P0DMV8	TH211Y
P0DMV8_611	20	5.45354	P0DMV8	TH211Y
P0DN79_233	20	0	P0DN79	TH211Y
P10398_155	20	0	P10398	TH211Y
P10768_202	20	2.52285	P10768	TH211Y
P10768_211	20	NA	P10768	TH211Y
P11021_635	20	NA	P11021	TH211Y
P11310_183	20	0	P11310	TH211Y
P11310_419	20	3.98552	P11310	TH211Y
P11586_723	20	0	P11586	TH211Y
P12268_459	20	9.35238	P12268	TH211Y
P12277_173	20	NA	P12277	TH211Y
P12277_39	20	0.676201	P12277	TH211Y
P13797_127	20	0	P13797	TH211Y
P13804_105	20	0	P13804	TH211Y
P13804_84	20	4.07356	P13804	TH211Y
P13984_161	20	NA	P13984	TH211Y
P14625_667	20	1.48098	P14625	TH211Y
P14625_727	20	10.0558	P14625	TH211Y
P14866_465	20	NA	P14866	TH211Y
P14866_474	20	NA	P14866	TH211Y
P15880_169	20	0	P15880	TH211Y
P15880_223	20	NA	P15880	TH211Y
P16930_244	20	5.82878	P16930	TH211Y
P17017_279	20	NA	P17017	TH211Y
P17812_96	20	0	P17812	TH211Y
P17844_518	20	5.16218	P17844	TH211Y
P17858_674	20	0	P17858	TH211Y
P17987_121	20	0	P17987	TH211Y
P18074_146	20	NA	P18074	TH211Y
P18669_142	20	NA	P18669	TH211Y
P18669_92	20	0	P18669	TH211Y
P18754_89	20	NA	P18754	TH211Y
P19525_404	20	NA	P19525	TH211Y
P21108_94	20	NA	P21108	TH211Y
P22033_587	20	NA	P22033	TH211Y
P22626_244	20	NA	P22626	TH211Y
P22626_247	20	NA	P22626	TH211Y
P22626_262	20	NA	P22626	TH211Y
P22626_331	20	NA	P22626	TH211Y
P22626_336	20	NA	P22626	TH211Y
P22626_347	20	0	P22626	TH211Y
P22695_182	20	NA	P22695	TH211Y
P23246_597	20	NA	P23246	TH211Y
P23246_602	20	0	P23246	TH211Y
P23246_698	20	0	P23246	TH211Y
P23528_117	20	NA	P23528	TH211Y
P23528_82	20	6.23005	P23528	TH211Y
P23528_89	20	1.13579	P23528	TH211Y
P23588_224	20	NA	P23588	TH211Y
P23743_240	20	NA	P23743	TH211Y
P23743_623	20	0	P23743	TH211Y
P23919_56	20	0.920695	P23919	TH211Y
P23921_279	20	0	P23921	TH211Y
P23921_285	20	7.58019	P23921	TH211Y
P24534_182	20	6.34271	P24534	TH211Y
P24666_132	20	NA	P24666	TH211Y
P24752_170	20	NA	P24752	TH211Y
P24752_219	20	0	P24752	TH211Y
P24928_618	20	0	P24928	TH211Y
P24941_269	20	NA	P24941	TH211Y
P25205_174	20	NA	P25205	TH211Y
P25205_188	20	10.1471	P25205	TH211Y
P25205_19	20	0	P25205	TH211Y
P25205_32	20	0	P25205	TH211Y
P25205_45	20	NA	P25205	TH211Y
P25787_97	20	8.56228	P25787	TH211Y
P26368_463	20	0.712081	P26368	TH211Y
P26599_430	20	1.19671	P26599	TH211Y
P26640_601	20	NA	P26640	TH211Y
P26641_78	20	10.3874	P26641	TH211Y
P27348_128	20	NA	P27348	TH211Y
P27361_280	20	0	P27361	TH211Y
P27707_210	20	NA	P27707	TH211Y
P27708_459	20	7.52283	P27708	TH211Y
P28066_185	20	0	P28066	TH211Y
P28161_116	20	8.80147	P28161	TH211Y
P29401_137	20	0	P29401	TH211Y
P29401_481	20	NA	P29401	TH211Y
P29401_58	20	10.3185	P29401	TH211Y
P30084_112	20	0	P30084	TH211Y
P30837_373	20	0	P30837	TH211Y
P30876_1135	20	7.12515	P30876	TH211Y
P30876_262	20	4.9042	P30876	TH211Y
P31689_376	20	0	P31689	TH211Y
P31939_104	20	0	P31939	TH211Y
P31943_180	20	9.40076	P31943	TH211Y
P31943_249	20	0	P31943	TH211Y
P31943_266	20	0	P31943	TH211Y
P31943_276	20	3.22357	P31943	TH211Y
P31943_306	20	0	P31943	TH211Y
P31943_82	20	0	P31943	TH211Y
P31948_468	20	NA	P31948	TH211Y
P32929_60	20	0	P32929	TH211Y
P33991_223	20	NA	P33991	TH211Y
P33991_532	20	2.00055	P33991	TH211Y
P33991_546	20	NA	P33991	TH211Y
P33992_191	20	0	P33992	TH211Y
P33993_297	20	NA	P33993	TH211Y
P33993_333	20	0	P33993	TH211Y
P33993_539	20	0	P33993	TH211Y
P34897_206	20	0	P34897	TH211Y
P34897_228	20	NA	P34897	TH211Y
P34897_370	20	NA	P34897	TH211Y
P35251_590	20	4.68736	P35251	TH211Y
P35269_84	20	NA	P35269	TH211Y
P35573_391	20	0	P35573	TH211Y
P35580_1467	20	NA	P35580	TH211Y
P35606_101	20	NA	P35606	TH211Y
P35606_201	20	NA	P35606	TH211Y
P35659_142	20	0	P35659	TH211Y
P36578_52	20	NA	P36578	TH211Y
P36639_48	20	0	P36639	TH211Y
P36776_473	20	NA	P36776	TH211Y
P37108_27	20	NA	P37108	TH211Y
P38646_331	20	NA	P38646	TH211Y
P38646_652	20	6.06299	P38646	TH211Y
P40925_278	20	NA	P40925	TH211Y
P40937_263	20	NA	P40937	TH211Y
P41214_418	20	0	P41214	TH211Y
P41227_137	20	NA	P41227	TH211Y
P41250_467	20	0	P41250	TH211Y
P41252_327	20	NA	P41252	TH211Y
P41252_618	20	0	P41252	TH211Y
P41252_845	20	0	P41252	TH211Y
P42166_573	20	NA	P42166	TH211Y
P42704_1341	20	NA	P42704	TH211Y
P42704_570	20	0	P42704	TH211Y
P42704_586	20	NA	P42704	TH211Y
P43034_102	20	0	P43034	TH211Y
P43034_137	20	NA	P43034	TH211Y
P43034_290	20	NA	P43034	TH211Y
P43243_213	20	0	P43243	TH211Y
P43243_214	20	NA	P43243	TH211Y
P43243_250	20	0	P43243	TH211Y
P43243_827	20	0	P43243	TH211Y
P43686_392	20	0	P43686	TH211Y
P43897_159	20	NA	P43897	TH211Y
P43897_234	20	NA	P43897	TH211Y
P45954_372	20	NA	P45954	TH211Y
P45974_70	20	0	P45974	TH211Y
P46013_734	20	0	P46013	TH211Y
P46776_109	20	0	P46776	TH211Y
P46778_65	20	NA	P46778	TH211Y
P46781_13	20	NA	P46781	TH211Y
P46781_165	20	0	P46781	TH211Y
P46782_45	20	0	P46782	TH211Y
P48643_274	20	3.06915	P48643	TH211Y
P48735_179	20	0	P48735	TH211Y
P49207_78	20	0	P49207	TH211Y
P49321_540	20	0	P49321	TH211Y
P49321_635	20	10.7871	P49321	TH211Y
P49327_1253	20	0.202851	P49327	TH211Y
P49327_1707	20	8.01477	P49327	TH211Y
P49327_2034	20	5.46406	P49327	TH211Y
P49327_2454	20	0	P49327	TH211Y
P49327_2462	20	0	P49327	TH211Y
P49327_45	20	0	P49327	TH211Y
P49368_232	20	0	P49368	TH211Y
P49368_247	20	6.15453	P49368	TH211Y
P49411_133	20	0.227953	P49411	TH211Y
P49589_60	20	NA	P49589	TH211Y
P49591_220	20	NA	P49591	TH211Y
P49591_263	20	0	P49591	TH211Y
P49591_267	20	NA	P49591	TH211Y
P49792_961	20	NA	P49792	TH211Y
P49903_90	20	NA	P49903	TH211Y
P49915_604	20	0	P49915	TH211Y
P50570_265	20	NA	P50570	TH211Y
P50570_726	20	0	P50570	TH211Y
P50990_30	20	8.15005	P50990	TH211Y
P50990_304	20	6.83665	P50990	TH211Y
P50990_308	20	NA	P50990	TH211Y
P51991_360	20	0	P51991	TH211Y
P51991_373	20	3.66288	P51991	TH211Y
P52597_219	20	0	P52597	TH211Y
P52597_272	20	0	P52597	TH211Y
P52597_276	20	0	P52597	TH211Y
P52701_469	20	6.88165	P52701	TH211Y
P52732_211	20	0	P52732	TH211Y
P53611_30	20	0	P53611	TH211Y
P53611_39	20	0	P53611	TH211Y
P53618_379	20	0	P53618	TH211Y
P53618_521	20	0	P53618	TH211Y
P53621_1160	20	NA	P53621	TH211Y
P53621_1177	20	NA	P53621	TH211Y
P53621_326	20	NA	P53621	TH211Y
P53621_628	20	9.27657	P53621	TH211Y
P54136_323	20	NA	P54136	TH211Y
P54136_505	20	NA	P54136	TH211Y
P54577_341	20	0	P54577	TH211Y
P54577_472	20	NA	P54577	TH211Y
P54578_401	20	7.75585	P54578	TH211Y
P55010_52	20	0	P55010	TH211Y
P55060_369	20	0	P55060	TH211Y
P55795_240	20	NA	P55795	TH211Y
P55795_243	20	NA	P55795	TH211Y
P55795_246	20	NA	P55795	TH211Y
P55795_249	20	0	P55795	TH211Y
P55795_253	20	0	P55795	TH211Y
P55795_276	20	0	P55795	TH211Y
P56192_201	20	0	P56192	TH211Y
P56192_314	20	0	P56192	TH211Y
P56270_307	20	0	P56270	TH211Y
P56270_337	20	0	P56270	TH211Y
P58004_349	20	NA	P58004	TH211Y
P58876_122	20	0	P58876	TH211Y
P60709_91	20	2.54624	P60709	TH211Y
P60842_48	20	2.57837	P60842	TH211Y
P60900_159	20	0	P60900	TH211Y
P61081_172	20	0	P61081	TH211Y
P61158_245	20	NA	P61158	TH211Y
P61163_171	20	NA	P61163	TH211Y
P61163_38	20	0	P61163	TH211Y
P61221_172	20	8.84994	P61221	TH211Y
P61247_155	20	NA	P61247	TH211Y
P61254_74	20	NA	P61254	TH211Y
P61313_81	20	NA	P61313	TH211Y
P61353_75	20	NA	P61353	TH211Y
P61513_18	20	NA	P61513	TH211Y
P61586_66	20	NA	P61586	TH211Y
P61758_57	20	2.58609	P61758	TH211Y
P61978_225	20	0	P61978	TH211Y
P61978_230	20	0	P61978	TH211Y
P61981_154	20	NA	P61981	TH211Y
P62241_27	20	0	P62241	TH211Y
P62244_46	20	NA	P62244	TH211Y
P62258_214	20	7.23283	P62258	TH211Y
P62280_99	20	NA	P62280	TH211Y
P62310_46	20	NA	P62310	TH211Y
P62312_40	20	10.377	P62312	TH211Y
P62333_173	20	0	P62333	TH211Y
P62333_207	20	11.2818	P62333	TH211Y
P62633_120	20	NA	P62633	TH211Y
P62750_74	20	11.5181	P62750	TH211Y
P62820_112	20	NA	P62820	TH211Y
P62829_38	20	0.27794	P62829	TH211Y
P62899_25	20	11.22	P62899	TH211Y
P62979_105	20	0	P62979	TH211Y
P62979_106	20	NA	P62979	TH211Y
P62979_148	20	5.01757	P62979	TH211Y
P63244_140	20	NA	P63244	TH211Y
P63244_194	20	NA	P63244	TH211Y
P67809_158	20	NA	P67809	TH211Y
P67809_162	20	NA	P67809	TH211Y
P67809_208	20	NA	P67809	TH211Y
P68104_177	20	1.18539	P68104	TH211Y
P68363_108	20	2.92526	P68363	TH211Y
P68363_161	20	0	P68363	TH211Y
P68371_51	20	0	P68371	TH211Y
P78347_460	20	NA	P78347	TH211Y
P78347_492	20	7.6726	P78347	TH211Y
P78347_894	20	0	P78347	TH211Y
P78371_297	20	8.15684	P78371	TH211Y
P78371_299	20	0	P78371	TH211Y
P78527_115	20	NA	P78527	TH211Y
P78527_1411	20	NA	P78527	TH211Y
P78527_2440	20	0	P78527	TH211Y
P78527_2772	20	0	P78527	TH211Y
P78527_2775	20	NA	P78527	TH211Y
P78527_2936	20	NA	P78527	TH211Y
P78527_3013	20	NA	P78527	TH211Y
P78527_3168	20	0	P78527	TH211Y
P78527_3315	20	0	P78527	TH211Y
P78527_4046	20	NA	P78527	TH211Y
P84243_42	20	NA	P84243	TH211Y
P85037_159	20	NA	P85037	TH211Y
P85037_205	20	NA	P85037	TH211Y
P85037_266	20	0	P85037	TH211Y
Q00341_465	20	NA	Q00341	TH211Y
Q00535_236	20	NA	Q00535	TH211Y
Q00610_1237	20	NA	Q00610	TH211Y
Q00610_966	20	NA	Q00610	TH211Y
Q00796_54	20	NA	Q00796	TH211Y
Q00839_266	20	5.72176	Q00839	TH211Y
Q00839_327	20	0.440336	Q00839	TH211Y
Q00839_802	20	10.0248	Q00839	TH211Y
Q00839_820	20	0	Q00839	TH211Y
Q00839_824	20	0	Q00839	TH211Y
Q00839_825	20	0	Q00839	TH211Y
Q01081_114	20	0	Q01081	TH211Y
Q01081_158	20	0	Q01081	TH211Y
Q01085_242	20	0	Q01085	TH211Y
Q01518_31	20	0	Q01518	TH211Y
Q01518_419	20	10.0579	Q01518	TH211Y
Q01581_375	20	NA	Q01581	TH211Y
Q03468_460	20	NA	Q03468	TH211Y
Q04760_136	20	0.429466	Q04760	TH211Y
Q04837_119	20	NA	Q04837	TH211Y
Q05048_320	20	10.4504	Q05048	TH211Y
Q06203_157	20	NA	Q06203	TH211Y
Q06210_684	20	0	Q06210	TH211Y
Q06830_194	20	0	Q06830	TH211Y
Q07666_145	20	7.71061	Q07666	TH211Y
Q07864_1381	20	0	Q07864	TH211Y
Q07864_416	20	NA	Q07864	TH211Y
Q08752_252	20	0	Q08752	TH211Y
Q08J23_51	20	0.577482	Q08J23	TH211Y
Q08J23_98	20	0	Q08J23	TH211Y
Q09161_294	20	NA	Q09161	TH211Y
Q12996_534	20	0	Q12996	TH211Y
Q13111_780	20	NA	Q13111	TH211Y
Q13148_374	20	NA	Q13148	TH211Y
Q13263_208	20	0	Q13263	TH211Y
Q13263_449	20	NA	Q13263	TH211Y
Q13263_458	20	0	Q13263	TH211Y
Q13283_40	20	0	Q13283	TH211Y
Q13283_56	20	0	Q13283	TH211Y
Q13330_355	20	0	Q13330	TH211Y
Q13347_300	20	0	Q13347	TH211Y
Q13363_319	20	NA	Q13363	TH211Y
Q13435_592	20	NA	Q13435	TH211Y
Q13509_51	20	8.40723	Q13509	TH211Y
Q13526_23	20	3.52166	Q13526	TH211Y
Q13547_237	20	NA	Q13547	TH211Y
Q13555_231	20	NA	Q13555	TH211Y
Q13630_82	20	NA	Q13630	TH211Y
Q13765_112	20	1.54805	Q13765	TH211Y
Q13769_673	20	0	Q13769	TH211Y
Q13838_362	20	NA	Q13838	TH211Y
Q13885_50	20	5.49909	Q13885	TH211Y
Q13885_51	20	0.244736	Q13885	TH211Y
Q14012_195	20	0	Q14012	TH211Y
Q14119_87	20	NA	Q14119	TH211Y
Q14126_368	20	0	Q14126	TH211Y
Q14202_1300	20	NA	Q14202	TH211Y
Q14204_2641	20	0.450602	Q14204	TH211Y
Q14204_4196	20	6.48072	Q14204	TH211Y
Q14257_109	20	NA	Q14257	TH211Y
Q14258_323	20	NA	Q14258	TH211Y
Q14376_267	20	NA	Q14376	TH211Y
Q14498_293	20	0	Q14498	TH211Y
Q14566_276	20	1.95655	Q14566	TH211Y
Q14566_575	20	0	Q14566	TH211Y
Q14671_103	20	0	Q14671	TH211Y
Q14683_186	20	0	Q14683	TH211Y
Q14694_34	20	NA	Q14694	TH211Y
Q14694_659	20	0	Q14694	TH211Y
Q14807_126	20	0	Q14807	TH211Y
Q14839_1040	20	NA	Q14839	TH211Y
Q14839_1804	20	NA	Q14839	TH211Y
Q14974_321	20	7.31921	Q14974	TH211Y
Q14974_529	20	NA	Q14974	TH211Y
Q14980_1903	20	NA	Q14980	TH211Y
Q14C86_1331	20	NA	Q14C86	TH211Y
Q15003_111	20	0	Q15003	TH211Y
Q15046_76	20	0	Q15046	TH211Y
Q15366_182	20	5.59709	Q15366	TH211Y
Q15418_321	20	NA	Q15418	TH211Y
Q15418_576	20	NA	Q15418	TH211Y
Q15437_707	20	0	Q15437	TH211Y
Q15475_92	20	0	Q15475	TH211Y
Q15527_113	20	0	Q15527	TH211Y
Q15555_158	20	NA	Q15555	TH211Y
Q15555_162	20	0	Q15555	TH211Y
Q15555_167	20	0	Q15555	TH211Y
Q15785_54	20	NA	Q15785	TH211Y
Q15785_95	20	NA	Q15785	TH211Y
Q16181_309	20	NA	Q16181	TH211Y
Q16539_182	20	6.60854	Q16539	TH211Y
Q16576_180	20	NA	Q16576	TH211Y
Q16630_395	20	NA	Q16630	TH211Y
Q16644_76	20	0	Q16644	TH211Y
Q29RF7_472	20	2.75811	Q29RF7	TH211Y
Q2NL82_524	20	NA	Q2NL82	TH211Y
Q2TAL8_337	20	NA	Q2TAL8	TH211Y
Q4KMP7_577	20	NA	Q4KMP7	TH211Y
Q4VCS5_281	20	NA	Q4VCS5	TH211Y
Q5JRX3_383	20	0.300526	Q5JRX3	TH211Y
Q5T8P6_35	20	0	Q5T8P6	TH211Y
Q5VWZ2_210	20	NA	Q5VWZ2	TH211Y
Q5VWZ2_66	20	NA	Q5VWZ2	TH211Y
Q5VZL5_703	20	NA	Q5VZL5	TH211Y
Q6IBW4_370	20	NA	Q6IBW4	TH211Y
Q6KC79_2567	20	NA	Q6KC79	TH211Y
Q6P1J9_290	20	NA	Q6P1J9	TH211Y
Q6P2Q9_756	20	NA	Q6P2Q9	TH211Y
Q6P2Q9_88	20	NA	Q6P2Q9	TH211Y
Q6P3X3_719	20	0	Q6P3X3	TH211Y
Q6PI48_237	20	NA	Q6PI48	TH211Y
Q6UXN9_64	20	0	Q6UXN9	TH211Y
Q6UXN9_71	20	NA	Q6UXN9	TH211Y
Q6ZU65_558	20	NA	Q6ZU65	TH211Y
Q7KZF4_796	20	NA	Q7KZF4	TH211Y
Q7L2J0_661	20	NA	Q7L2J0	TH211Y
Q7L2J0_679	20	0	Q7L2J0	TH211Y
Q7LBC6_196	20	7.7052	Q7LBC6	TH211Y
Q7RTV0_51	20	0	Q7RTV0	TH211Y
Q7RTV0_54	20	0	Q7RTV0	TH211Y
Q7Z4W1_149	20	0	Q7Z4W1	TH211Y
Q7Z5L9_17	20	NA	Q7Z5L9	TH211Y
Q86V81_77	20	0	Q86V81	TH211Y
Q86VP6_797	20	NA	Q86VP6	TH211Y
Q86XI2_331	20	NA	Q86XI2	TH211Y
Q86YE8_498	20	NA	Q86YE8	TH211Y
Q8IWC1_252	20	NA	Q8IWC1	TH211Y
Q8IWS0_103	20	9.97534	Q8IWS0	TH211Y
Q8IWS0_105	20	0	Q8IWS0	TH211Y
Q8N999_64	20	NA	Q8N999	TH211Y
Q8NFI3_304	20	NA	Q8NFI3	TH211Y
Q8TDX7_289	20	NA	Q8TDX7	TH211Y
Q8WVV9_263	20	NA	Q8WVV9	TH211Y
Q92499_628	20	NA	Q92499	TH211Y
Q92616_1399	20	0	Q92616	TH211Y
Q92616_2079	20	NA	Q92616	TH211Y
Q92616_2186	20	8.70594	Q92616	TH211Y
Q92769_359	20	NA	Q92769	TH211Y
Q92769_68	20	9.36895	Q92769	TH211Y
Q92785_27	20	NA	Q92785	TH211Y
Q92841_580	20	0	Q92841	TH211Y
Q92945_317	20	0	Q92945	TH211Y
Q92945_682	20	NA	Q92945	TH211Y
Q93009_706	20	NA	Q93009	TH211Y
Q969G3_119	20	NA	Q969G3	TH211Y
Q969G3_36	20	NA	Q969G3	TH211Y
Q96AE4_60	20	0	Q96AE4	TH211Y
Q96CN7_132	20	0	Q96CN7	TH211Y
Q96FW1_79	20	NA	Q96FW1	TH211Y
Q96PK6_249	20	9.29187	Q96PK6	TH211Y
Q96PK6_285	20	NA	Q96PK6	TH211Y
Q96PK6_540	20	NA	Q96PK6	TH211Y
Q96PK6_645	20	5.91348	Q96PK6	TH211Y
Q96S55_469	20	NA	Q96S55	TH211Y
Q96S55_492	20	9.41155	Q96S55	TH211Y
Q99436_136	20	NA	Q99436	TH211Y
Q99538_217	20	NA	Q99538	TH211Y
Q99538_221	20	NA	Q99538	TH211Y
Q99807_61	20	NA	Q99807	TH211Y
Q99832_111	20	0	Q99832	TH211Y
Q99880_122	20	0	Q99880	TH211Y
Q99956_212	20	0	Q99956	TH211Y
Q99956_252	20	9.20711	Q99956	TH211Y
Q99986_198	20	NA	Q99986	TH211Y
Q9BPW8_104	20	NA	Q9BPW8	TH211Y
Q9BQA1_122	20	0	Q9BQA1	TH211Y
Q9BSJ2_427	20	NA	Q9BSJ2	TH211Y
Q9BTE7_144	20	NA	Q9BTE7	TH211Y
Q9BUF5_36	20	0	Q9BUF5	TH211Y
Q9BUF5_50	20	0	Q9BUF5	TH211Y
Q9BUK6_63	20	3.61411	Q9BUK6	TH211Y
Q9BV68_11	20	NA	Q9BV68	TH211Y
Q9BVA1_36	20	7.17058	Q9BVA1	TH211Y
Q9BVA1_51	20	0	Q9BVA1	TH211Y
Q9BVA1_59	20	6.31448	Q9BVA1	TH211Y
Q9BWF3_325	20	NA	Q9BWF3	TH211Y
Q9BWF3_345	20	NA	Q9BWF3	TH211Y
Q9BXB4_306	20	NA	Q9BXB4	TH211Y
Q9BXP5_625	20	NA	Q9BXP5	TH211Y
Q9BY77_236	20	NA	Q9BY77	TH211Y
Q9BYB4_324	20	NA	Q9BYB4	TH211Y
Q9BZK7_480	20	NA	Q9BZK7	TH211Y
Q9BZZ5_11	20	10.6668	Q9BZZ5	TH211Y
Q9GZS3_282	20	NA	Q9GZS3	TH211Y
Q9H0D6_909	20	NA	Q9H0D6	TH211Y
Q9H0D6_938	20	0	Q9H0D6	TH211Y
Q9H2P0_764	20	0	Q9H2P0	TH211Y
Q9H4A4_640	20	0	Q9H4A4	TH211Y
Q9H773_141	20	0	Q9H773	TH211Y
Q9H7E9_186	20	0	Q9H7E9	TH211Y
Q9H857_457	20	0	Q9H857	TH211Y
Q9H9A6_329	20	NA	Q9H9A6	TH211Y
Q9NP79_285	20	NA	Q9NP79	TH211Y
Q9NR46_77	20	NA	Q9NR46	TH211Y
Q9NR50_124	20	0	Q9NR50	TH211Y
Q9NSE4_312	20	NA	Q9NSE4	TH211Y
Q9NTJ3_1124	20	8.69107	Q9NTJ3	TH211Y
Q9NTJ3_95	20	5.30607	Q9NTJ3	TH211Y
Q9NUQ8_206	20	NA	Q9NUQ8	TH211Y
Q9NVA2_255	20	NA	Q9NVA2	TH211Y
Q9NVS9_195	20	NA	Q9NVS9	TH211Y
Q9NW08_960	20	NA	Q9NW08	TH211Y
Q9NXF7_165	20	2.90414	Q9NXF7	TH211Y
Q9NYV4_968	20	0	Q9NYV4	TH211Y
Q9P2J5_111	20	NA	Q9P2J5	TH211Y
Q9P2J5_684	20	NA	Q9P2J5	TH211Y
Q9P2J5_812	20	NA	Q9P2J5	TH211Y
Q9UBD5_482	20	0	Q9UBD5	TH211Y
Q9UBD5_527	20	0	Q9UBD5	TH211Y
Q9UBD5_608	20	NA	Q9UBD5	TH211Y
Q9UBT2_191	20	NA	Q9UBT2	TH211Y
Q9UG63_487	20	2.08092	Q9UG63	TH211Y
Q9UI10_186	20	0	Q9UI10	TH211Y
Q9UI26_333	20	NA	Q9UI26	TH211Y
Q9UL46_33	20	NA	Q9UL46	TH211Y
Q9UMS4_207	20	NA	Q9UMS4	TH211Y
Q9UMS4_320	20	NA	Q9UMS4	TH211Y
Q9UMX0_276	20	0	Q9UMX0	TH211Y
Q9UPT9_389	20	0	Q9UPT9	TH211Y
Q9Y223_156	20	7.72146	Q9Y223	TH211Y
Q9Y230_215	20	0	Q9Y230	TH211Y
Q9Y243_323	20	5.39794	Q9Y243	TH211Y
Q9Y262_357	20	0	Q9Y262	TH211Y
Q9Y265_150	20	0	Q9Y265	TH211Y
Q9Y285_305	20	0	Q9Y285	TH211Y
Q9Y285_310	20	0	Q9Y285	TH211Y
Q9Y2L1_132	20	NA	Q9Y2L1	TH211Y
Q9Y2L5_192	20	NA	Q9Y2L5	TH211Y
Q9Y2R9_239	20	NA	Q9Y2R9	TH211Y
Q9Y2Z0_47	20	0	Q9Y2Z0	TH211Y
Q9Y365_171	20	NA	Q9Y365	TH211Y
Q9Y3F4_261	20	NA	Q9Y3F4	TH211Y
Q9Y3I0_475	20	0	Q9Y3I0	TH211Y
Q9Y4B4_937	20	NA	Q9Y4B4	TH211Y
Q9Y4R8_246	20	10.6118	Q9Y4R8	TH211Y
Q9Y5K5_176	20	NA	Q9Y5K5	TH211Y
Q9Y5Q8_182	20	10.3323	Q9Y5Q8	TH211Y
Q9Y5Q8_347	20	NA	Q9Y5Q8	TH211Y
Q9Y5X1_496	20	NA	Q9Y5X1	TH211Y
Q9Y696_220	20	NA	Q9Y696	TH211Y
Q9Y696_244	20	0	Q9Y696	TH211Y
Q14671_784	19.9289	4.78421	Q14671	TH211Y
P63104_118	19.9176	NA	P63104	TH211Y
Q96BY7_649	19.9046	6.14704	Q96BY7	TH211Y
P61758_180	19.8844	NA	P61758	TH211Y
Q9BVC4_62	19.8371	NA	Q9BVC4	TH211Y
Q8TDX7_202	19.8183	NA	Q8TDX7	TH211Y
Q00839_669	19.7864	7.50625	Q00839	TH211Y
P62701_103	19.7752	NA	P62701	TH211Y
P42766_78	19.7323	0.309115	P42766	TH211Y
Q8N8N7_100	19.7288	2.65553	Q8N8N7	TH211Y
P35914_176	19.7085	0.412211	P35914	TH211Y
P78347_124	19.6926	NA	P78347	TH211Y
P09651_341	19.6896	1.07651	P09651	TH211Y
O95757_105	19.6733	9.1512	O95757	TH211Y
Q7KZF4_109	19.6376	8.12792	Q7KZF4	TH211Y
Q92900_958	19.6233	NA	Q92900	TH211Y
P08243_536	19.6173	NA	P08243	TH211Y
Q9Y285_469	19.612	2.29185	Q9Y285	TH211Y
O14654_1046	19.6081	0.554301	O14654	TH211Y
P41252_626	19.6078	5.50755	P41252	TH211Y
P49327_289	19.5348	0.537199	P49327	TH211Y
Q9UN37_45	19.5263	NA	Q9UN37	TH211Y
P07900_61	19.4967	6.65882	P07900	TH211Y
P36578_277	19.4237	0.814947	P36578	TH211Y
P11142_431	19.4179	0.672165	P11142	TH211Y
P24928_891	19.4017	NA	P24928	TH211Y
P61978_323	19.3712	3.66942	P61978	TH211Y
P61158_16	19.3588	3.14536	P61158	TH211Y
Q9P2J5_46	19.3258	3.72877	Q9P2J5	TH211Y
Q14204_3051	19.3165	0.966556	Q14204	TH211Y
O14818_21	19.2731	NA	O14818	TH211Y
P52597_266	19.2594	1.04732	P52597	TH211Y
Q9Y5P6_10	19.1975	0.926667	Q9Y5P6	TH211Y
Q14103_244	19.1432	2.64902	Q14103	TH211Y
P20042_298	19.1057	9.5404	P20042	TH211Y
P62266_134	19.0922	NA	P62266	TH211Y
O43719_173	19.0713	1.31335	O43719	TH211Y
Q9BZX2_245	19.0625	NA	Q9BZX2	TH211Y
P83731_55	19.0616	1.32715	P83731	TH211Y
Q9P2J5_939	19.041	1.35621	Q9P2J5	TH211Y
Q9NRZ9_226	19.0213	NA	Q9NRZ9	TH211Y
O14744_481	18.9633	NA	O14744	TH211Y
P31689_381	18.9597	4.51103	P31689	TH211Y
P25685_67	18.9588	NA	P25685	TH211Y
Q9Y3B2_7	18.88	1.58399	Q9Y3B2	TH211Y
P62701_149	18.8632	9.63787	P62701	TH211Y
Q14126_212	18.8497	NA	Q14126	TH211Y
P60842_391	18.8482	0	P60842	TH211Y
P46782_48	18.8422	6.50037	P46782	TH211Y
P41227_106	18.8172	2.56797	P41227	TH211Y
P30086_81	18.8019	4.07913	P30086	TH211Y
Q9Y2L1_121	18.8009	1.69574	Q9Y2L1	TH211Y
P40937_236	18.7979	7.0471	P40937	TH211Y
Q9UMX5_137	18.7881	9.57687	Q9UMX5	TH211Y
Q9Y2X9_274	18.7739	1.73399	Q9Y2X9	TH211Y
Q00839_293	18.7235	1.80531	Q00839	TH211Y
O15027_1113	18.7173	NA	O15027	TH211Y
P28340_798	18.6587	1.89689	P28340	TH211Y
P28331_294	18.6554	NA	P28331	TH211Y
P31939_362	18.6527	NA	P31939	TH211Y
P35659_114	18.6371	6.60956	P35659	TH211Y
P53396_542	18.6222	NA	P53396	TH211Y
Q9UBT2_159	18.6136	1.96064	Q9UBT2	TH211Y
P68104_85	18.5992	1.53513	P68104	TH211Y
P40227_109	18.5788	NA	P40227	TH211Y
Q9BTM1_40	18.563	NA	Q9BTM1	TH211Y
Q8IWZ8_214	18.5469	2.05501	Q8IWZ8	TH211Y
P60842_356	18.5046	7.80404	P60842	TH211Y
Q96T88_466	18.496	NA	Q96T88	TH211Y
Q06210_35	18.4921	6.95115	Q06210	TH211Y
P29401_321	18.4877	NA	P29401	TH211Y
P53621_634	18.4825	NA	P53621	TH211Y
Q9UHD9_272	18.4693	NA	Q9UHD9	TH211Y
P50570_125	18.4578	0	P50570	TH211Y
P11177_77	18.4562	10.6149	P11177	TH211Y
P52272_213	18.4407	NA	P52272	TH211Y
P23743_669	18.4305	1.94796	P23743	TH211Y
Q8IUF1_50	18.3676	NA	Q8IUF1	TH211Y
Q05048_367	18.3607	0	Q05048	TH211Y
P49915_304	18.3549	2.32648	P49915	TH211Y
P68363_312	18.3464	NA	P68363	TH211Y
P33993_33	18.3415	8.66832	P33993	TH211Y
P20339_82	18.3351	NA	P20339	TH211Y
P61020_82	18.3351	NA	P61020	TH211Y
P08238_430	18.3263	8.24363	P08238	TH211Y
O94925_249	18.3134	0	O94925	TH211Y
Q14204_2265	18.3096	6.75073	Q14204	TH211Y
O43242_457	18.3092	9.82967	O43242	TH211Y
P28482_187	18.2829	7.78606	P28482	TH211Y
Q9Y262_409	18.281	NA	Q9Y262	TH211Y
P56192_307	18.2782	10.4084	P56192	TH211Y
Q96PK6_114	18.2705	NA	Q96PK6	TH211Y
P13639_639	18.2322	NA	P13639	TH211Y
P61978_380	18.109	7.48793	P61978	TH211Y
P23743_148	18.0901	8.96066	P23743	TH211Y
Q92878_957	18.0827	NA	Q92878	TH211Y
O95373_275	18.0821	2.21456	O95373	TH211Y
P09211_199	18.0739	NA	P09211	TH211Y
Q9Y3B4_61	18.0699	0	Q9Y3B4	TH211Y
P12081_172	18.0493	2.7587	P12081	TH211Y
Q8IWS0_303	18.0288	2.2761	Q8IWS0	TH211Y
Q00610_1477	18.0113	NA	Q00610	TH211Y
P62249_49	17.9959	NA	P62249	TH211Y
Q9BSJ2_456	17.9833	2.85202	Q9BSJ2	TH211Y
Q5VZL5_282	17.9646	2.87853	Q5VZL5	TH211Y
P08238_619	17.9526	NA	P08238	TH211Y
Q9P258_420	17.9286	2.92943	Q9P258	TH211Y
P40926_56	17.9051	NA	P40926	TH211Y
P49411_122	17.8953	4.10777	P49411	TH211Y
P49721_134	17.8866	5.10324	P49721	TH211Y
Q6W2J9_1350	17.8583	NA	Q6W2J9	TH211Y
O60502_805	17.8483	5.38506	O60502	TH211Y
Q6P2Q9_1432	17.848	3.04332	Q6P2Q9	TH211Y
Q13547_87	17.8465	5.9153	Q13547	TH211Y
Q09028_181	17.8434	1.24514	Q09028	TH211Y
Q9Y3F4_252	17.8241	NA	Q9Y3F4	TH211Y
P54577_123	17.8069	8.02814	P54577	TH211Y
P53621_249	17.8052	4.25454	P53621	TH211Y
Q9BX40_114	17.7785	3.14173	Q9BX40	TH211Y
P60709_294	17.7424	NA	P60709	TH211Y
Q14166_452	17.734	NA	Q14166	TH211Y
P78347_373	17.7321	2.61871	P78347	TH211Y
O14654_336	17.7157	2.63765	O14654	TH211Y
Q00610_1451	17.6828	10.8335	Q00610	TH211Y
Q99613_881	17.6639	3.30375	Q99613	TH211Y
Q14204_604	17.6635	NA	Q14204	TH211Y
O43837_366	17.6588	3.31094	O43837	TH211Y
O43347_239	17.6498	3.32367	O43347	TH211Y
P07437_106	17.631	NA	P07437	TH211Y
P51858_100	17.6212	3.36414	P51858	TH211Y
P07437_159	17.6124	3.56866	P07437	TH211Y
P08243_67	17.5725	NA	P08243	TH211Y
P62269_77	17.5671	0	P62269	TH211Y
P00558_196	17.5652	8.32868	P00558	TH211Y
Q9BTD8_424	17.5447	3.47226	Q9BTD8	TH211Y
Q9Y262_329	17.5254	1.0439	Q9Y262	TH211Y
P07437_222	17.5137	4.20596	P07437	TH211Y
Q14839_892	17.5038	3.53009	Q14839	TH211Y
P07437_310	17.5009	7.29523	P07437	TH211Y
Q9BSJ2_83	17.5004	3.53498	Q9BSJ2	TH211Y
P60709_166	17.4966	NA	P60709	TH211Y
P11940_364	17.4935	6.9587	P11940	TH211Y
P18074_141	17.4799	NA	P18074	TH211Y
Q5UIP0_947	17.4784	3.56607	Q5UIP0	TH211Y
O14654_921	17.4779	NA	O14654	TH211Y
Q9Y230_362	17.474	NA	Q9Y230	TH211Y
P14618_175	17.4631	7.40941	P14618	TH211Y
Q9NZI8_206	17.4362	8.59127	Q9NZI8	TH211Y
O14737_73	17.4206	2.97844	O14737	TH211Y
Q8IU81_315	17.4061	NA	Q8IU81	TH211Y
P08238_56	17.388	5.64554	P08238	TH211Y
P61158_202	17.381	3.48021	P61158	TH211Y
P78527_2004	17.3734	NA	P78527	TH211Y
P68363_282	17.3682	4.63589	P68363	TH211Y
P08243_40	17.3477	6.82092	P08243	TH211Y
Q13162_54	17.3372	2.77583	Q13162	TH211Y
O43390_435	17.3196	3.79065	O43390	TH211Y
Q9NRZ9_518	17.2655	3.86714	Q9NRZ9	TH211Y
O95801_26	17.2443	9.4853	O95801	TH211Y
P28074_220	17.2296	0	P28074	TH211Y
Q9P2J5_373	17.2203	NA	Q9P2J5	TH211Y
P60510_124	17.2008	NA	P60510	TH211Y
P62714_127	17.2008	NA	P62714	TH211Y
P67775_127	17.2008	NA	P67775	TH211Y
P41240_64	17.1871	8.27912	P41240	TH211Y
P10809_90	17.1766	3.26021	P10809	TH211Y
Q14566_598	17.1692	NA	Q14566	TH211Y
Q9HB71_199	17.1584	NA	Q9HB71	TH211Y
Q8WVE0_144	17.155	0	Q8WVE0	TH211Y
Q9H9P8_285	17.1482	NA	Q9H9P8	TH211Y
Q92597_307	17.1008	NA	Q92597	TH211Y
P14625_563	17.1005	6.63072	P14625	TH211Y
Q13451_223	17.0423	NA	Q13451	TH211Y
P68402_56	17.0256	NA	P68402	TH211Y
Q8NI60_330	16.9968	NA	Q8NI60	TH211Y
P27824_214	16.9943	3.47074	P27824	TH211Y
P63104_211	16.9828	3.48398	P63104	TH211Y
Q99459_100	16.9797	0	Q99459	TH211Y
Q12931_498	16.9767	9.76062	Q12931	TH211Y
P62273_34	16.9649	NA	P62273	TH211Y
Q14247_104	16.9582	7.24647	Q14247	TH211Y
P40926_253	16.9339	NA	P40926	TH211Y
P78406_174	16.9225	NA	P78406	TH211Y
P24928_43	16.9131	4.3656	P24928	TH211Y
P62280_55	16.9085	0	P62280	TH211Y
Q9UHD8_473	16.8906	3.92785	Q9UHD8	TH211Y
P04075_174	16.8845	4.40592	P04075	TH211Y
P27708_1322	16.8794	7.70426	P27708	TH211Y
P10826_208	16.8724	NA	P10826	TH211Y
Q8IWS0_301	16.8641	3.62107	Q8IWS0	TH211Y
Q8N163_100	16.8599	NA	Q8N163	TH211Y
P31153_371	16.8459	NA	P31153	TH211Y
Q96DH6_40	16.8456	4.46093	Q96DH6	TH211Y
Q99707_368	16.8177	3.91418	Q99707	TH211Y
P54136_92	16.804	NA	P54136	TH211Y
P35637_468	16.782	4.55094	P35637	TH211Y
P62851_65	16.7805	NA	P62851	TH211Y
P61353_38	16.7783	NA	P61353	TH211Y
P49321_91	16.7744	2.79315	P49321	TH211Y
P11413_424	16.7627	NA	P11413	TH211Y
Q9NVH2_353	16.7593	4.58305	Q9NVH2	TH211Y
Q14839_1322	16.7567	7.19715	Q14839	TH211Y
P53618_896	16.7558	4.58798	P53618	TH211Y
P17987_545	16.7454	NA	P17987	TH211Y
P06493_270	16.7357	7.96586	P06493	TH211Y
Q92616_565	16.6817	NA	Q92616	TH211Y
P04075_328	16.677	6.43386	P04075	TH211Y
O95757_230	16.6272	4.90424	O95757	TH211Y
P07900_465	16.6208	NA	P07900	TH211Y
Q92769_238	16.6205	NA	Q92769	TH211Y
P08238_596	16.6029	7.45542	P08238	TH211Y
P30086_181	16.5766	7.55931	P30086	TH211Y
Q07666_435	16.5609	4.8636	Q07666	TH211Y
O95801_129	16.5391	2.13494	O95801	TH211Y
P35998_147	16.5118	4.93307	P35998	TH211Y
Q9NZT2_79	16.4901	NA	Q9NZT2	TH211Y
Q15046_77	16.4897	4.9643	Q15046	TH211Y
P29401_309	16.4804	7.90362	P29401	TH211Y
Q13330_540	16.479	NA	Q13330	TH211Y
P62191_295	16.4517	NA	P62191	TH211Y
O75251_62	16.4505	NA	O75251	TH211Y
P38117_192	16.443	5.03041	P38117	TH211Y
P61978_449	16.4419	4.10857	P61978	TH211Y
P07900_197	16.44	2.53597	P07900	TH211Y
P08238_192	16.44	2.53597	P08238	TH211Y
P23743_22	16.4334	8.68061	P23743	TH211Y
P27361_204	16.4282	9.23066	P27361	TH211Y
O60814_84	16.4204	3.69303	O60814	TH211Y
P58876_84	16.4204	3.69303	P58876	TH211Y
Q99880_84	16.4204	3.69303	Q99880	TH211Y
Q9BWD1_237	16.4176	5.06621	Q9BWD1	TH211Y
P52701_642	16.4072	NA	P52701	TH211Y
P25789_179	16.3543	5.15582	P25789	TH211Y
Q9BZL6_246	16.3526	NA	Q9BZL6	TH211Y
Q9ULK4_258	16.352	5.92783	Q9ULK4	TH211Y
P46063_61	16.3448	NA	P46063	TH211Y
O75369_2502	16.3448	4.90526	O75369	TH211Y
Q9Y3Z3_315	16.3427	5.17218	Q9Y3Z3	TH211Y
Q16576_283	16.3421	NA	Q16576	TH211Y
Q16181_306	16.3306	NA	Q16181	TH211Y
P62280_92	16.3125	NA	P62280	TH211Y
Q9UI26_331	16.3107	NA	Q9UI26	TH211Y
P60842_197	16.3085	5.0849	P60842	TH211Y
Q06210_158	16.2901	4.28387	Q06210	TH211Y
O60271_578	16.266	NA	O60271	TH211Y
Q9Y333_4	16.2476	0	Q9Y333	TH211Y
Q9NUU7_422	16.2335	NA	Q9NUU7	TH211Y
P31943_240	16.2053	NA	P31943	TH211Y
Q14204_2967	16.1961	2.32156	Q14204	TH211Y
Q99714_101	16.1899	4.39955	Q99714	TH211Y
Q9NR50_278	16.1621	4.13768	Q9NR50	TH211Y
P40925_192	16.1462	4.86531	P40925	TH211Y
P14866_375	16.1344	NA	P14866	TH211Y
O95602_609	16.1007	5.5144	O95602	TH211Y
P52565_133	16.0987	4.51717	P52565	TH211Y
Q99986_52	16.0938	5.52419	Q99986	TH211Y
P55209_96	16.0911	5.47667	P55209	TH211Y
Q7KZ85_1184	16.0835	4.52242	Q7KZ85	TH211Y
P35998_111	16.0644	6.49866	P35998	TH211Y
O75419_238	16.0584	NA	O75419	TH211Y
P68363_272	16.0226	5.72338	P68363	TH211Y
Q9BQE3_272	16.0226	5.72338	Q9BQE3	TH211Y
P14618_83	16.0023	4.61615	P14618	TH211Y
P49411_246	15.9861	8.53617	P49411	TH211Y
O75832_160	15.9697	4.62527	O75832	TH211Y
Q14204_2892	15.9563	0.0779854	Q14204	TH211Y
P68363_408	15.945	NA	P68363	TH211Y
P04406_255	15.9256	NA	P04406	TH211Y
P00519_393	15.9181	5.77264	P00519	TH211Y
Q1KMD3_741	15.8954	NA	Q1KMD3	TH211Y
Q9BVA1_310	15.873	6.19555	Q9BVA1	TH211Y
P68363_224	15.8715	4.8401	P68363	TH211Y
O95373_161	15.8481	6.64075	O95373	TH211Y
P24928_492	15.8325	NA	P24928	TH211Y
Q9NVE7_258	15.8319	8.37035	Q9NVE7	TH211Y
P51991_364	15.8229	5.66334	P51991	TH211Y
Q92945_644	15.8038	2.13823	Q92945	TH211Y
O75821_171	15.802	NA	O75821	TH211Y
P55072_755	15.7998	5.93995	P55072	TH211Y
P27708_229	15.7906	5.95299	P27708	TH211Y
P60520_25	15.7715	3.25495	P60520	TH211Y
Q9UG63_503	15.7579	NA	Q9UG63	TH211Y
O75533_1049	15.7532	4.90382	O75533	TH211Y
Q92922_454	15.7512	NA	Q92922	TH211Y
Q8TCG1_626	15.7335	NA	Q8TCG1	TH211Y
Q9H1A4_1753	15.7299	NA	Q9H1A4	TH211Y
P12268_509	15.7262	NA	P12268	TH211Y
Q15645_318	15.6775	NA	Q15645	TH211Y
P49327_1996	15.6633	2.51969	P49327	TH211Y
P14866_48	15.6347	6.17341	P14866	TH211Y
P40926_161	15.6331	2.539	P40926	TH211Y
P33993_102	15.6158	4.93992	P33993	TH211Y
P67809_138	15.6154	2.80699	P67809	TH211Y
P02545_259	15.611	6.20702	P02545	TH211Y
Q8NFP7_67	15.6092	6.20951	Q8NFP7	TH211Y
P09622_153	15.5903	6.23632	P09622	TH211Y
O15372_277	15.5868	6.24115	O15372	TH211Y
Q05048_170	15.5843	0	Q05048	TH211Y
P26599_127	15.58	7.56922	P26599	TH211Y
Q6PD62_548	15.572	6.26219	Q6PD62	TH211Y
P61964_243	15.5705	NA	P61964	TH211Y
P78347_920	15.5217	6.78178	P78347	TH211Y
Q13162_60	15.4962	5.02134	Q13162	TH211Y
P09211_8	15.4957	7.68047	P09211	TH211Y
P62979_140	15.4912	NA	P62979	TH211Y
O75348_87	15.458	6.4234	O75348	TH211Y
P49591_224	15.4497	7.50577	P49591	TH211Y
Q7LBC6_1530	15.4496	6.43529	Q7LBC6	TH211Y
P28074_224	15.4447	NA	P28074	TH211Y
O15145_132	15.4305	NA	O15145	TH211Y
Q9UBB5_196	15.4259	6.4687	Q9UBB5	TH211Y
Q15393_1166	15.4211	5.28729	Q15393	TH211Y
P40937_157	15.4171	6.48115	P40937	TH211Y
P08243_516	15.4106	NA	P08243	TH211Y
Q9BV86_34	15.4086	NA	Q9BV86	TH211Y
P23921_435	15.3764	NA	P23921	TH211Y
Q9UMS4_329	15.3649	NA	Q9UMS4	TH211Y
P33993_393	15.3615	3.13384	P33993	TH211Y
Q6YHU6_1360	15.3268	6.6089	Q6YHU6	TH211Y
Q9H6H4_115	15.3158	1.97156	Q9H6H4	TH211Y
Q15046_95	15.3146	5.69236	Q15046	TH211Y
Q9BXJ9_247	15.3058	0	Q9BXJ9	TH211Y
P55769_32	15.3001	NA	P55769	TH211Y
Q9BY32_45	15.2913	NA	Q9BY32	TH211Y
O14802_1333	15.2888	NA	O14802	TH211Y
P14868_239	15.2667	6.69384	P14868	TH211Y
Q13509_106	15.262	5.91824	Q13509	TH211Y
P28340_1037	15.2566	4.33505	P28340	TH211Y
P62269_40	15.2403	NA	P62269	TH211Y
P29401_275	15.2124	NA	P29401	TH211Y
P31943_236	15.1923	NA	P31943	TH211Y
Q13547_201	15.1901	5.55405	Q13547	TH211Y
Q9P2J5_76	15.1859	3.17828	Q9P2J5	TH211Y
P23743_258	15.1607	6.84384	P23743	TH211Y
Q15019_17	15.1547	9.16979	Q15019	TH211Y
P62937_48	15.15	5.20857	P62937	TH211Y
P14618_390	15.1342	7.49204	P14618	TH211Y
P50990_47	15.1027	5.17471	P50990	TH211Y
P31943_243	15.0876	4.19388	P31943	TH211Y
P42704_1328	15.0631	6.98187	P42704	TH211Y
P60709_306	15.0604	6.63537	P60709	TH211Y
O00267_802	15.0598	NA	O00267	TH211Y
P00390_158	15.0322	NA	P00390	TH211Y
P31153_235	15.0282	NA	P31153	TH211Y
Q4VCS5_832	14.9949	7.52207	Q4VCS5	TH211Y
Q96D46_236	14.9927	NA	Q96D46	TH211Y
P47897_238	14.971	7.11206	P47897	TH211Y
O43913_45	14.9531	6.3607	O43913	TH211Y
Q99986_311	14.9423	0	Q99986	TH211Y
Q99459_210	14.9323	7.16682	Q99459	TH211Y
Q12874_11	14.919	6.80651	Q12874	TH211Y
P00505_316	14.9057	0	P00505	TH211Y
Q12789_1645	14.895	7.21955	Q12789	TH211Y
P62258_49	14.8856	4.20434	P62258	TH211Y
P63104_48	14.8856	4.28989	P63104	TH211Y
P11142_149	14.8739	9.91145	P11142	TH211Y
P83731_14	14.8718	1.90611	P83731	TH211Y
Q99832_438	14.8493	0	Q99832	TH211Y
P27694_470	14.8225	5.97842	P27694	TH211Y
P04181_85	14.8015	8.33655	P04181	TH211Y
P78527_157	14.7691	NA	P78527	TH211Y
Q9NZI8_5	14.7629	7.40632	Q9NZI8	TH211Y
P56192_718	14.7604	NA	P56192	TH211Y
P24752_214	14.743	4.47729	P24752	TH211Y
Q14257_39	14.7348	2.79177	Q14257	TH211Y
P23246_293	14.7309	NA	P23246	TH211Y
Q92945_674	14.7152	6.79744	Q92945	TH211Y
P68363_319	14.6892	5.34605	P68363	TH211Y
P35606_658	14.6874	3.88528	P35606	TH211Y
Q9BXP5_630	14.6382	NA	Q9BXP5	TH211Y
Q4VCS5_719	14.6371	7.58425	Q4VCS5	TH211Y
Q9BVA1_159	14.6003	2.53788	Q9BVA1	TH211Y
Q00839_613	14.5781	NA	Q00839	TH211Y
Q08J23_38	14.5741	2.80969	Q08J23	TH211Y
P34897_292	14.5647	7.6867	P34897	TH211Y
P11177_334	14.5581	NA	P11177	TH211Y
P07195_173	14.5567	NA	P07195	TH211Y
Q15019_296	14.555	9.14577	Q15019	TH211Y
P34897_96	14.5398	4.79374	P34897	TH211Y
P11142_107	14.5232	6.72902	P11142	TH211Y
P60709_362	14.5205	3.27767	P60709	TH211Y
Q92616_1391	14.4705	1.86501	Q92616	TH211Y
Q13885_59	14.4696	6.34969	Q13885	TH211Y
Q9GZS3_120	14.4671	0.181777	Q9GZS3	TH211Y
P68104_29	14.4613	4.8564	P68104	TH211Y
P06493_181	14.4575	6.39992	P06493	TH211Y
P52701_977	14.4498	NA	P52701	TH211Y
P62854_62	14.4445	5.30187	P62854	TH211Y
O75832_138	14.4307	7.87615	O75832	TH211Y
Q9UJW0_150	14.4058	7.9114	Q9UJW0	TH211Y
P10809_223	14.4053	NA	P10809	TH211Y
P00558_76	14.3986	0.711651	P00558	TH211Y
P20618_135	14.3849	4.63141	P20618	TH211Y
Q96PU8_204	14.3696	7.9626	Q96PU8	TH211Y
P31939_208	14.3621	0.859357	P31939	TH211Y
O60264_742	14.3604	NA	O60264	TH211Y
Q14166_473	14.3551	7.47566	Q14166	TH211Y
P14618_466	14.3518	0	P14618	TH211Y
Q14980_1938	14.3449	6.5299	Q14980	TH211Y
P62847_76	14.3408	NA	P62847	TH211Y
P68363_24	14.3202	8.10777	P68363	TH211Y
P62993_52	14.3167	NA	P62993	TH211Y
P52597_240	14.311	8.04545	P52597	TH211Y
P07437_183	14.299	NA	P07437	TH211Y
P13995_170	14.2817	NA	P13995	TH211Y
Q13310_291	14.266	5.72	Q13310	TH211Y
O95785_1455	14.2625	8.11401	O95785	TH211Y
P00338_127	14.2553	NA	P00338	TH211Y
P08238_520	14.2467	NA	P08238	TH211Y
Q6P3X3_715	14.2414	NA	Q6P3X3	TH211Y
Q9NSE4_260	14.2381	6.65324	Q9NSE4	TH211Y
P07900_627	14.2364	NA	P07900	TH211Y
P61353_77	14.2252	7.25167	P61353	TH211Y
Q01433_534	14.2245	NA	Q01433	TH211Y
Q1KMD3_740	14.2231	NA	Q1KMD3	TH211Y
P11586_240	14.2102	8.18806	P11586	TH211Y
Q6YP21_97	14.2042	8.19651	Q6YP21	TH211Y
P22626_300	14.1876	NA	P22626	TH211Y
P63173_43	14.1872	8.22051	P63173	TH211Y
Q16181_223	14.1833	6.71656	Q16181	TH211Y
P12270_682	14.1602	NA	P12270	TH211Y
Q4J6C6_108	14.1428	NA	Q4J6C6	TH211Y
Q00169_24	14.1175	NA	Q00169	TH211Y
Q9Y2V2_99	14.1155	NA	Q9Y2V2	TH211Y
Q14204_1120	14.0844	4.94776	Q14204	TH211Y
P61247_31	14.0756	0.712028	P61247	TH211Y
P12277_125	14.0703	8.3858	P12277	TH211Y
P12004_114	14.0611	6.8576	P12004	TH211Y
O14929_363	14.0317	NA	O14929	TH211Y
P26639_284	14.0267	NA	P26639	TH211Y
P50991_24	14.0072	2.07246	P50991	TH211Y
P52701_1298	14.0045	7.71248	P52701	TH211Y
P68104_357	13.9994	8.4626	P68104	TH211Y
Q13509_36	13.9953	6.93369	Q13509	TH211Y
Q9Y678_565	13.9906	5.30461	Q9Y678	TH211Y
Q16539_35	13.99	8.49947	Q16539	TH211Y
Q9Y3F4_114	13.9884	NA	Q9Y3F4	TH211Y
P23743_42	13.9791	8.51486	P23743	TH211Y
Q14C86_1368	13.9735	8.52279	Q14C86	TH211Y
P04406_140	13.9628	NA	P04406	TH211Y
P00505_420	13.961	NA	P00505	TH211Y
O95373_977	13.9414	NA	O95373	TH211Y
Q14204_1889	13.9345	NA	Q14204	TH211Y
Q14166_308	13.9339	7.00452	Q14166	TH211Y
P20618_133	13.9216	5.34168	P20618	TH211Y
P36507_183	13.9039	NA	P36507	TH211Y
P28074_149	13.8897	7.05553	P28074	TH211Y
P61978_280	13.8687	4.66081	P61978	TH211Y
Q9NSE4_60	13.8591	NA	Q9NSE4	TH211Y
P82663_34	13.8543	8.69136	P82663	TH211Y
P17812_336	13.8492	NA	P17812	TH211Y
Q8NEM7_364	13.844	NA	Q8NEM7	TH211Y
O43395_439	13.8114	8.75194	O43395	TH211Y
P49916_666	13.8045	NA	P49916	TH211Y
P25787_167	13.8043	5.74354	P25787	TH211Y
O00567_152	13.7746	NA	O00567	TH211Y
Q14203_1149	13.7691	NA	Q14203	TH211Y
Q8N1F7_801	13.7557	10.0177	Q8N1F7	TH211Y
Q14008_358	13.7445	3.80084	Q14008	TH211Y
Q9Y305_104	13.7423	0	Q9Y305	TH211Y
Q13148_73	13.7296	6.54954	Q13148	TH211Y
Q13151_145	13.7242	4.95678	Q13151	TH211Y
P61158_273	13.719	NA	P61158	TH211Y
P41252_289	13.7142	NA	P41252	TH211Y
P60709_53	13.7113	NA	P60709	TH211Y
P50991_179	13.7101	3.56953	P50991	TH211Y
Q13347_139	13.7015	NA	Q13347	TH211Y
P62633_99	13.6952	7.54368	P62633	TH211Y
P78527_366	13.6857	NA	P78527	TH211Y
P11388_151	13.6837	NA	P11388	TH211Y
O94925_304	13.6827	1.23184	O94925	TH211Y
P62263_72	13.6807	2.36044	P62263	TH211Y
P23246_490	13.6781	8.94053	P23246	TH211Y
P25398_127	13.6756	0	P25398	TH211Y
P61254_78	13.6691	8.95322	P61254	TH211Y
Q15181_193	13.6596	NA	Q15181	TH211Y
Q9BSD7_81	13.6465	6.6458	Q9BSD7	TH211Y
P60842_50	13.6434	7.65205	P60842	TH211Y
P46782_188	13.6423	2.9353	P46782	TH211Y
P54136_338	13.6326	7.35241	P54136	TH211Y
Q9Y3Z3_521	13.626	NA	Q9Y3Z3	TH211Y
P62136_137	13.6258	7.62624	P62136	TH211Y
O43390_434	13.6169	9.02705	O43390	TH211Y
O75521_169	13.5969	NA	O75521	TH211Y
Q96FW1_258	13.5938	0	Q96FW1	TH211Y
P78527_701	13.5893	NA	P78527	TH211Y
P09960_324	13.5821	NA	P09960	TH211Y
Q9Y262_247	13.5776	4.98456	Q9Y262	TH211Y
Q86TB9_473	13.5649	7.43065	Q86TB9	TH211Y
P54136_382	13.5509	NA	P54136	TH211Y
P61604_76	13.5107	0	P61604	TH211Y
P31943_246	13.5102	NA	P31943	TH211Y
Q9BPW8_83	13.5057	9.18427	Q9BPW8	TH211Y
P12277_100	13.5005	5.34312	P12277	TH211Y
P68104_167	13.4995	1.92784	P68104	TH211Y
P53597_51	13.4892	NA	P53597	TH211Y
Q9Y4L1_443	13.4798	NA	Q9Y4L1	TH211Y
Q96CW5_403	13.4626	NA	Q96CW5	TH211Y
Q99986_213	13.4587	0	Q99986	TH211Y
O95372_205	13.4518	NA	O95372	TH211Y
P48643_420	13.4506	NA	P48643	TH211Y
P27797_150	13.4409	0.574172	P27797	TH211Y
P68371_50	13.4406	1.77193	P68371	TH211Y
Q13111_808	13.4342	8.35223	Q13111	TH211Y
Q9Y3F4_280	13.4188	0	Q9Y3F4	TH211Y
P07900_528	13.4178	NA	P07900	TH211Y
P17812_106	13.4157	NA	P17812	TH211Y
P49588_279	13.4097	NA	P49588	TH211Y
Q14204_2638	13.4046	6.30613	Q14204	TH211Y
O14818_110	13.4032	3.80412	O14818	TH211Y
P62241_198	13.402	0	P62241	TH211Y
P13639_443	13.3916	0.985878	P13639	TH211Y
P00338_239	13.39	8.20416	P00338	TH211Y
P04181_133	13.3743	8.84181	P04181	TH211Y
P36542_196	13.3676	NA	P36542	TH211Y
Q13889_101	13.3634	NA	Q13889	TH211Y
P11177_131	13.3587	7.69654	P11177	TH211Y
Q9Y467_577	13.3481	NA	Q9Y467	TH211Y
P0DMV8_115	13.2957	5.86364	P0DMV8	TH211Y
P62249_99	13.2951	NA	P62249	TH211Y
P61163_33	13.2883	9.33702	P61163	TH211Y
Q9BU89_290	13.2787	9.50531	Q9BU89	TH211Y
Q92841_519	13.2669	9.52208	Q92841	TH211Y
O60884_35	13.2656	9.52388	O60884	TH211Y
P07814_224	13.2503	NA	P07814	TH211Y
Q10567_121	13.2333	9.5696	Q10567	TH211Y
P30048_221	13.2295	4.82498	P30048	TH211Y
Q01780_718	13.2273	7.82041	Q01780	TH211Y
Q96RP9_713	13.2266	7.8212	Q96RP9	TH211Y
P68104_141	13.219	NA	P68104	TH211Y
P11142_134	13.2173	3.84723	P11142	TH211Y
P49419_526	13.212	1.2999	P49419	TH211Y
O14744_304	13.2111	NA	O14744	TH211Y
Q9UNF1_346	13.2068	NA	Q9UNF1	TH211Y
P62854_73	13.1887	7.86496	P62854	TH211Y
P53396_384	13.1783	NA	P53396	TH211Y
P68032_93	13.1773	1.27312	P68032	TH211Y
Q9Y696_128	13.1687	3.2247	Q9Y696	TH211Y
P26641_145	13.162	NA	P26641	TH211Y
Q15813_418	13.1483	NA	Q15813	TH211Y
O60547_69	13.1458	NA	O60547	TH211Y
Q15233_265	13.1425	7.42804	Q15233	TH211Y
P30084_137	13.1297	4.88698	P30084	TH211Y
P39019_48	13.128	0	P39019	TH211Y
P00374_157	13.1208	0	P00374	TH211Y
Q9UNS1_282	13.1192	NA	Q9UNS1	TH211Y
Q96S55_500	13.1105	9.74321	Q96S55	TH211Y
P42704_165	13.0937	9.13466	P42704	TH211Y
Q6UN15_454	13.0745	NA	Q6UN15	TH211Y
Q92616_1526	13.0629	4.84811	Q92616	TH211Y
P19338_495	13.0598	5.82207	P19338	TH211Y
P06737_263	13.0292	NA	P06737	TH211Y
P54886_782	13.0269	6.08817	P54886	TH211Y
Q9BVP2_194	13.0178	9.87429	Q9BVP2	TH211Y
P27824_514	13.0156	NA	P27824	TH211Y
O95983_83	13.0118	NA	O95983	TH211Y
P08559_156	13.0067	NA	P08559	TH211Y
P08243_398	13.0015	5.54548	P08243	TH211Y
Q92947_153	12.9941	0	Q92947	TH211Y
O60502_715	12.9941	9.90788	O60502	TH211Y
Q14566_783	12.9928	9.9112	Q14566	TH211Y
P60900_96	12.9718	4.43682	P60900	TH211Y
Q9UHB9_246	12.9638	NA	Q9UHB9	TH211Y
P06744_392	12.9599	9.95615	P06744	TH211Y
P35637_325	12.9508	NA	P35637	TH211Y
P36776_394	12.9474	8.14361	P36776	TH211Y
P53618_887	12.936	4.36082	P53618	TH211Y
P08243_185	12.9282	NA	P08243	TH211Y
P00338_10	12.9246	5.50551	P00338	TH211Y
Q14694_364	12.9165	8.48824	Q14694	TH211Y
P53597_78	12.9132	6.60813	P53597	TH211Y
P26640_428	12.9124	NA	P26640	TH211Y
Q9NVX2_128	12.9078	NA	Q9NVX2	TH211Y
P08243_517	12.8367	5.79563	P08243	TH211Y
P21266_120	12.8306	10.1391	P21266	TH211Y
Q6PGP7_87	12.827	10.1442	Q6PGP7	TH211Y
P08670_11	12.824	NA	P08670	TH211Y
Q16836_226	12.8145	NA	Q16836	TH211Y
Q14257_122	12.8055	10.1745	Q14257	TH211Y
Q9UIU6_228	12.8044	NA	Q9UIU6	TH211Y
P06737_281	12.8021	10.1793	P06737	TH211Y
Q9BV86_215	12.8018	0	Q9BV86	TH211Y
Q15020_507	12.7999	NA	Q15020	TH211Y
Q15233_267	12.7979	NA	Q15233	TH211Y
P24752_256	12.795	NA	P24752	TH211Y
Q6ZRS2_742	12.7937	NA	Q6ZRS2	TH211Y
Q92945_626	12.7869	5.74994	Q92945	TH211Y
P11766_93	12.7662	NA	P11766	TH211Y
P0DMV8_525	12.7651	NA	P0DMV8	TH211Y
Q9Y678_531	12.7581	10.2417	Q9Y678	TH211Y
P50991_269	12.7353	NA	P50991	TH211Y
P55795_306	12.7346	NA	P55795	TH211Y
P35579_400	12.7264	1.9994	P35579	TH211Y
P35580_407	12.7264	1.9994	P35580	TH211Y
Q16576_20	12.7227	2.35332	Q16576	TH211Y
Q14119_219	12.7191	10.2967	Q14119	TH211Y
Q14683_1113	12.6931	NA	Q14683	TH211Y
O43143_499	12.6884	7.32452	O43143	TH211Y
O75533_719	12.6861	NA	O75533	TH211Y
P26641_24	12.6777	2.85418	P26641	TH211Y
P40925_119	12.6735	NA	P40925	TH211Y
P45954_413	12.648	10.3972	P45954	TH211Y
P62195_121	12.6375	4.34385	P62195	TH211Y
Q9NR45_81	12.6365	7.20973	Q9NR45	TH211Y
P06733_189	12.6242	2.89216	P06733	TH211Y
Q09161_98	12.6005	NA	Q09161	TH211Y
Q14257_97	12.5977	0.348317	Q14257	TH211Y
P15170_146	12.5725	9.06951	P15170	TH211Y
Q96PU8_17	12.5706	10.5068	Q96PU8	TH211Y
P22102_236	12.5688	8.58078	P22102	TH211Y
P62081_177	12.5583	NA	P62081	TH211Y
P06744_92	12.5113	8.64719	P06744	TH211Y
P62277_18	12.508	4.10227	P62277	TH211Y
Q13347_241	12.5067	10.5971	Q13347	TH211Y
P56545_325	12.4903	8.67145	P56545	TH211Y
P02786_503	12.4863	10.6259	P02786	TH211Y
Q15293_115	12.4772	1.47157	Q15293	TH211Y
Q9H773_129	12.475	3.907	Q9H773	TH211Y
Q92616_1312	12.4677	3.73614	Q92616	TH211Y
P07437_51	12.46	NA	P07437	TH211Y
P23921_620	12.4556	NA	P23921	TH211Y
P48556_315	12.4458	3.24426	P48556	TH211Y
P24534_126	12.4298	4.35145	P24534	TH211Y
P07195_84	12.4242	4.65528	P07195	TH211Y
O15217_9	12.4237	7.01419	O15217	TH211Y
P12004_60	12.4215	8.75092	P12004	TH211Y
P46776_52	12.4122	0	P46776	TH211Y
P62277_89	12.4005	0	P62277	TH211Y
Q99614_280	12.3994	8.87245	Q99614	TH211Y
P49720_104	12.3936	NA	P49720	TH211Y
O00299_117	12.3921	7.54112	O00299	TH211Y
P10809_385	12.3842	NA	P10809	TH211Y
Q9NVI1_923	12.3803	NA	Q9NVI1	TH211Y
Q96FW1_266	12.3706	7.07021	Q96FW1	TH211Y
P62826_155	12.3426	1.88364	P62826	TH211Y
Q96IU4_158	12.3404	0	Q96IU4	TH211Y
P49411_357	12.3302	4.45102	P49411	TH211Y
P17028_279	12.313	10.871	P17028	TH211Y
Q92616_876	12.3117	6.63312	Q92616	TH211Y
P61978_72	12.3092	3.04214	P61978	TH211Y
P61163_94	12.3051	0.134635	P61163	TH211Y
Q4VCS5_599	12.2981	8.89338	Q4VCS5	TH211Y
P60709_240	12.2912	6.01835	P60709	TH211Y
P07195_282	12.2899	NA	P07195	TH211Y
Q13330_585	12.2835	NA	Q13330	TH211Y
Q96C86_143	12.2498	10.9604	Q96C86	TH211Y
O43390_431	12.245	8.95471	O43390	TH211Y
P05387_3	12.2425	NA	P05387	TH211Y
Q08J23_52	12.2375	3.81407	Q08J23	TH211Y
Q9Y312_188	12.2327	10.9847	Q9Y312	TH211Y
O75390_381	12.21	NA	O75390	TH211Y
P26640_304	12.2053	9.77365	P26640	TH211Y
P11177_67	12.2046	NA	P11177	TH211Y
P25398_61	12.1956	NA	P25398	TH211Y
P13639_411	12.1848	11.0523	P13639	TH211Y
Q9P2J5_336	12.1804	1.76244	Q9P2J5	TH211Y
P43246_121	12.1726	1.17921	P43246	TH211Y
P25205_147	12.1664	6.63823	P25205	TH211Y
P49411_92	12.1533	0.894896	P49411	TH211Y
Q9BQA1_163	12.1505	NA	Q9BQA1	TH211Y
P53396_531	12.1499	1.64299	P53396	TH211Y
Q14697_489	12.1491	1.82111	Q14697	TH211Y
P23396_166	12.1489	0	P23396	TH211Y
Q9BYG5_172	12.1466	11.1063	Q9BYG5	TH211Y
P49591_401	12.1351	11.1226	P49591	TH211Y
P15880_266	12.1303	8.28166	P15880	TH211Y
Q9BV86_103	12.1206	0.582135	Q9BV86	TH211Y
P43243_243	12.1155	8.44571	P43243	TH211Y
P21281_378	12.1093	NA	P21281	TH211Y
P46821_263	12.1062	0.409083	P46821	TH211Y
Q13838_39	12.1017	0.457428	Q13838	TH211Y
Q7KZF4_533	12.0971	NA	Q7KZF4	TH211Y
Q9Y697_95	12.081	10.8975	Q9Y697	TH211Y
P50213_137	12.0801	NA	P50213	TH211Y
Q8N335_65	12.075	NA	Q8N335	TH211Y
Q9Y2X9_345	12.0621	NA	Q9Y2X9	TH211Y
P09601_134	12.0592	NA	P09601	TH211Y
Q13155_25	12.0559	9.17303	Q13155	TH211Y
P68104_418	12.0326	8.60222	P68104	TH211Y
Q9UMX5_88	12.0252	11.278	Q9UMX5	TH211Y
Q13263_242	12.0237	11.2802	Q13263	TH211Y
Q5JS54_58	12.0196	4.94035	Q5JS54	TH211Y
P54577_388	12.0108	NA	P54577	TH211Y
P33240_59	12.0036	11.3086	P33240	TH211Y
P62136_134	12.0034	7.58165	P62136	TH211Y
Q6NXE6_137	11.9972	11.3177	Q6NXE6	TH211Y
P07437_200	11.9961	11.3192	P07437	TH211Y
Q92947_204	11.9949	NA	Q92947	TH211Y
P60709_188	11.992	NA	P60709	TH211Y
Q9NPG3_463	11.9855	11.3343	Q9NPG3	TH211Y
Q14008_1879	11.9837	11.3368	Q14008	TH211Y
P0DMV8_41	11.983	6.64318	P0DMV8	TH211Y
P11142_41	11.983	6.64318	P11142	TH211Y
Q13555_517	11.9753	NA	Q13555	TH211Y
P62701_54	11.9743	0.653212	P62701	TH211Y
Q8NFP7_11	11.9724	11.3528	Q8NFP7	TH211Y
P23921_27	11.9589	NA	P23921	TH211Y
P41252_717	11.9483	0	P41252	TH211Y
P23743_218	11.9273	3.20921	P23743	TH211Y
P32322_135	11.9178	0	P32322	TH211Y
P23528_140	11.9089	5.18088	P23528	TH211Y
P46781_96	11.8858	1.46129	P46781	TH211Y
Q14671_83	11.8854	11.4757	Q14671	TH211Y
P17812_473	11.8839	5.68028	P17812	TH211Y
Q08211_748	11.8769	2.52294	Q08211	TH211Y
Q8NE71_697	11.8758	NA	Q8NE71	TH211Y
P17844_442	11.8696	3.56099	P17844	TH211Y
P22626_234	11.8688	4.32641	P22626	TH211Y
P15880_248	11.857	5.74499	P15880	TH211Y
P42765_20	11.8336	6.63381	P42765	TH211Y
P27348_48	11.8265	8.53062	P27348	TH211Y
Q00839_260	11.8	6.48443	Q00839	TH211Y
Q93008_648	11.747	11.6715	Q93008	TH211Y
Q7Z6Z7_1988	11.7454	7.31371	Q7Z6Z7	TH211Y
Q16181_41	11.7355	NA	Q16181	TH211Y
P11586_307	11.7299	4.53214	P11586	TH211Y
P62258_131	11.726	4.86812	P62258	TH211Y
P43034_394	11.7091	8.70942	P43034	TH211Y
P07195_240	11.6999	5.05647	P07195	TH211Y
Q16643_163	11.6979	NA	Q16643	TH211Y
P34932_30	11.6978	NA	P34932	TH211Y
P06493_237	11.6938	1.47333	P06493	TH211Y
Q9Y3I0_184	11.6893	5.21401	Q9Y3I0	TH211Y
P00558_324	11.6712	11.7787	P00558	TH211Y
P10809_503	11.6645	NA	P10809	TH211Y
P49321_596	11.6608	9.62924	P49321	TH211Y
Q15293_290	11.6531	7.68928	Q15293	TH211Y
Q6ICB0_12	11.6452	0	Q6ICB0	TH211Y
Q9ULV4_292	11.6431	NA	Q9ULV4	TH211Y
P23743_477	11.6305	2.66776	P23743	TH211Y
Q9Y266_292	11.6292	7.38322	Q9Y266	TH211Y
P62701_82	11.6244	NA	P62701	TH211Y
Q14204_3586	11.6189	NA	Q14204	TH211Y
P23526_165	11.6142	6.083	P23526	TH211Y
P30876_1020	11.6136	11.8602	P30876	TH211Y
P41252_198	11.6132	11.8607	P41252	TH211Y
Q99536_100	11.6105	3.6839	Q99536	TH211Y
P11940_297	11.6087	8.11064	P11940	TH211Y
Q14980_1774	11.6047	NA	Q14980	TH211Y
P11586_258	11.5956	NA	P11586	TH211Y
Q99832_232	11.5939	9.44091	Q99832	TH211Y
P08243_204	11.583	0.0569274	P08243	TH211Y
Q00688_198	11.5808	5.36115	Q00688	TH211Y
Q9NPH0_205	11.5808	NA	Q9NPH0	TH211Y
Q2NL82_779	11.572	NA	Q2NL82	TH211Y
Q14671_819	11.5674	4.2081	Q14671	TH211Y
P30566_294	11.5649	NA	P30566	TH211Y
P02786_523	11.5507	11.9491	P02786	TH211Y
Q15019_121	11.5455	0	Q15019	TH211Y
Q9NR45_71	11.5434	NA	Q9NR45	TH211Y
Q9BZX2_203	11.5337	0.712663	Q9BZX2	TH211Y
Q9H3S7_1165	11.5331	11.974	Q9H3S7	TH211Y
P13995_234	11.5315	NA	P13995	TH211Y
Q9BWF3_190	11.5292	11.9796	Q9BWF3	TH211Y
P46459_611	11.5286	9.78192	P46459	TH211Y
P63241_69	11.5177	NA	P63241	TH211Y
O75131_203	11.5159	9.79657	O75131	TH211Y
O60506_373	11.4995	2.58913	O60506	TH211Y
P34897_151	11.4987	NA	P34897	TH211Y
Q5JRX3_923	11.4958	12.0267	Q5JRX3	TH211Y
P46734_214	11.4902	4.88549	P46734	TH211Y
Q96T88_555	11.4856	5.10767	Q96T88	TH211Y
A0AVT1_523	11.485	NA	A0AVT1	TH211Y
P61221_411	11.4844	12.0429	P61221	TH211Y
P62277_38	11.4751	NA	P62277	TH211Y
Q9UHD9_265	11.4709	9.84853	Q9UHD9	TH211Y
Q8NFF5_313	11.4579	11.8238	Q8NFF5	TH211Y
P30520_202	11.4516	NA	P30520	TH211Y
P23743_122	11.4465	9.28812	P23743	TH211Y
P41252_869	11.4438	NA	P41252	TH211Y
Q9H0L4_25	11.4424	NA	Q9H0L4	TH211Y
Q5VZL5_355	11.4325	NA	Q5VZL5	TH211Y
Q14204_4205	11.4324	4.86112	Q14204	TH211Y
Q9Y697_269	11.4251	0.800175	Q9Y697	TH211Y
Q16778_41	11.4245	NA	Q16778	TH211Y
P17812_354	11.4195	6.15893	P17812	TH211Y
P52701_535	11.4177	12.1372	P52701	TH211Y
P27797_57	11.4173	3.45524	P27797	TH211Y
P23743_19	11.4149	NA	P23743	TH211Y
P49327_2439	11.4069	8.68303	P49327	TH211Y
Q9Y2X3_338	11.4066	NA	Q9Y2X3	TH211Y
P04350_51	11.4025	7.99629	P04350	TH211Y
Q6PI98_169	11.3918	0	Q6PI98	TH211Y
Q53GQ0_233	11.3781	12.1932	Q53GQ0	TH211Y
Q9BPW8_116	11.3727	12.2009	Q9BPW8	TH211Y
P07737_129	11.3701	3.42103	P07737	TH211Y
P78527_265	11.3535	12.228	P78527	TH211Y
Q2NL82_770	11.3422	NA	Q2NL82	TH211Y
P49327_277	11.342	9.99738	P49327	TH211Y
P23246_624	11.3389	12.2486	P23246	TH211Y
P18754_375	11.3315	5.64427	P18754	TH211Y
P68363_399	11.3305	NA	P68363	TH211Y
Q13547_221	11.3284	5.72003	Q13547	TH211Y
P13861_335	11.3158	NA	P13861	TH211Y
Q00839_257	11.3082	3.34408	Q00839	TH211Y
P11413_249	11.3028	NA	P11413	TH211Y
Q14204_2765	11.3024	5.02156	Q14204	TH211Y
Q9BZK7_456	11.3008	0	Q9BZK7	TH211Y
P31939_220	11.2973	1.7611	P31939	TH211Y
Q9Y285_292	11.2946	12.3113	Q9Y285	TH211Y
P08670_30	11.2934	0	P08670	TH211Y
P24941_236	11.28	0	P24941	TH211Y
P04181_209	11.2648	NA	P04181	TH211Y
Q15019_129	11.2531	NA	Q15019	TH211Y
O43395_546	11.2465	NA	O43395	TH211Y
P31943_195	11.246	0.602098	P31943	TH211Y
Q5T6F2_862	11.2437	5.7152	Q5T6F2	TH211Y
P55060_408	11.2417	5.4457	P55060	TH211Y
Q9HB40_270	11.2384	NA	Q9HB40	TH211Y
P61978_236	11.237	1.06758	P61978	TH211Y
P33993_345	11.212	0.507124	P33993	TH211Y
P51570_109	11.2111	NA	P51570	TH211Y
P08758_308	11.2097	7.09028	P08758	TH211Y
P23246_527	11.2011	7.91284	P23246	TH211Y
Q3MHD2_34	11.1957	10.847	Q3MHD2	TH211Y
P53396_517	11.1872	9.36345	P53396	TH211Y
P11802_17	11.1784	2.1759	P11802	TH211Y
Q14204_2881	11.1634	NA	Q14204	TH211Y
Q86U70_69	11.1519	6.11707	Q86U70	TH211Y
Q16836_264	11.1353	NA	Q16836	TH211Y
Q9Y230_442	11.1255	7.1118	Q9Y230	TH211Y
P07737_60	11.1227	1.19009	P07737	TH211Y
P78527_959	11.113	8.0677	P78527	TH211Y
P46459_294	11.1119	NA	P46459	TH211Y
Q92616_2001	11.1087	10.2668	Q92616	TH211Y
P45984_185	11.1054	NA	P45984	TH211Y
P43243_128	11.1013	6.41933	P43243	TH211Y
P45954_162	11.0911	12.599	P45954	TH211Y
P14866_47	11.0856	10.2934	P14866	TH211Y
P11310_158	11.0847	NA	P11310	TH211Y
P19338_473	11.0766	5.47185	P19338	TH211Y
P78527_4077	11.0741	0	P78527	TH211Y
P21266_66	11.0679	12.6318	P21266	TH211Y
Q9UBD5_607	11.0629	12.6389	Q9UBD5	TH211Y
O60814_38	11.0621	0.954205	O60814	TH211Y
Q96DT7_685	11.0502	12.657	Q96DT7	TH211Y
P60709_218	11.0434	NA	P60709	TH211Y
Q15031_299	11.0393	11.3097	Q15031	TH211Y
P07814_1269	11.0314	2.91235	P07814	TH211Y
Q92973_51	11.0297	0.300581	Q92973	TH211Y
P14868_245	11.0245	4.03641	P14868	TH211Y
Q92616_1706	11.0217	4.60622	Q92616	TH211Y
Q9Y285_412	11.0101	12.7136	Q9Y285	TH211Y
P51570_236	11.0092	3.62045	P51570	TH211Y
O00410_940	10.9923	4.82601	O00410	TH211Y
O43709_272	10.9908	12.741	O43709	TH211Y
O14776_547	10.9816	NA	O14776	TH211Y
P18754_194	10.9812	0	P18754	TH211Y
Q13547_226	10.971	0.59242	Q13547	TH211Y
P40937_26	10.9709	9.87096	P40937	TH211Y
Q9Y262_415	10.9659	11.6678	Q9Y262	TH211Y
O60506_276	10.9562	6.86159	O60506	TH211Y
P48643_137	10.9525	10.5771	P48643	TH211Y
P07437_36	10.9475	NA	P07437	TH211Y
Q9P2J5_52	10.9414	5.76003	Q9P2J5	TH211Y
Q14137_181	10.924	NA	Q14137	TH211Y
Q9Y2X9_671	10.9237	NA	Q9Y2X9	TH211Y
P13861_385	10.9119	6.59362	P13861	TH211Y
Q16836_254	10.9016	12.8671	Q16836	TH211Y
Q92945_625	10.899	2.96599	Q92945	TH211Y
Q9P2J5_237	10.8976	0.0904644	Q9P2J5	TH211Y
Q96PK6_655	10.8874	10.5223	Q96PK6	TH211Y
Q07666_440	10.8819	2.13911	Q07666	TH211Y
P17812_554	10.8708	NA	P17812	TH211Y
Q7Z5K2_358	10.8678	12.9149	Q7Z5K2	TH211Y
Q9P2R7_84	10.8604	6.00723	Q9P2R7	TH211Y
Q05639_177	10.8591	NA	Q05639	TH211Y
P21266_201	10.8586	12.9279	P21266	TH211Y
P46782_38	10.8504	5.86306	P46782	TH211Y
P06493_160	10.8437	12.9489	P06493	TH211Y
P26640_679	10.8426	12.9506	P26640	TH211Y
P78527_3859	10.8281	12.971	P78527	TH211Y
Q9P2J5_666	10.8209	3.47367	Q9P2J5	TH211Y
Q99536_59	10.8168	4.59629	Q99536	TH211Y
Q8N163_198	10.8112	5.30518	Q8N163	TH211Y
Q86VP6_398	10.8055	13.003	Q86VP6	TH211Y
P49411_266	10.8028	5.03912	P49411	TH211Y
P54578_195	10.8016	0.408286	P54578	TH211Y
P17812_292	10.8013	12.2957	P17812	TH211Y
Q71U36_357	10.7856	6.33546	Q71U36	TH211Y
O43252_565	10.7831	NA	O43252	TH211Y
P49756_256	10.7822	13.036	P49756	TH211Y
Q9Y314_16	10.7759	NA	Q9Y314	TH211Y
P34897_106	10.7752	NA	P34897	TH211Y
P78527_1739	10.7527	NA	P78527	TH211Y
P41252_608	10.7485	9.74374	P41252	TH211Y
Q14202_1257	10.7441	10.6878	Q14202	TH211Y
P31946_213	10.7405	0.0199648	P31946	TH211Y
O60814_43	10.7393	NA	O60814	TH211Y
P58876_43	10.7393	NA	P58876	TH211Y
P50548_322	10.7344	NA	P50548	TH211Y
P0DMV8_545	10.7342	6.20042	P0DMV8	TH211Y
P35998_174	10.7325	NA	P35998	TH211Y
Q96I24_524	10.7304	8.55324	Q96I24	TH211Y
Q9UMX0_269	10.7303	3.08804	Q9UMX0	TH211Y
P43243_508	10.729	1.52312	P43243	TH211Y
P26196_440	10.7266	5.7213	P26196	TH211Y
O43663_560	10.724	NA	O43663	TH211Y
P31153_242	10.7232	5.83893	P31153	TH211Y
Q9P2J5_54	10.7186	6.04352	Q9P2J5	TH211Y
Q9NRV9_65	10.7172	6.93502	Q9NRV9	TH211Y
Q9UNN5_225	10.7155	2.81358	Q9UNN5	TH211Y
Q8TEQ6_1188	10.7103	13.1376	Q8TEQ6	TH211Y
Q96QU8_104	10.7025	NA	Q96QU8	TH211Y
Q93008_1477	10.7018	3.98565	Q93008	TH211Y
P61254_135	10.701	NA	P61254	TH211Y
P04181_245	10.691	13.1649	P04181	TH211Y
Q96DT7_661	10.6861	13.1718	Q96DT7	TH211Y
P78527_682	10.6764	13.1856	P78527	TH211Y
P26639_298	10.6739	4.7826	P26639	TH211Y
P39019_54	10.6738	NA	P39019	TH211Y
P14618_370	10.6551	10.6996	P14618	TH211Y
P11586_834	10.651	6.65341	P11586	TH211Y
P0DMV8_134	10.6499	NA	P0DMV8	TH211Y
P52888_221	10.6425	4.85618	P52888	TH211Y
Q15785_243	10.6387	NA	Q15785	TH211Y
P27708_645	10.6348	NA	P27708	TH211Y
P49585_240	10.6301	13.2511	P49585	TH211Y
Q9UPT9_513	10.6161	8.49303	Q9UPT9	TH211Y
O43172_167	10.6153	NA	O43172	TH211Y
P25789_19	10.6141	13.2736	P25789	TH211Y
P78527_3378	10.6124	NA	P78527	TH211Y
P14625_677	10.6028	NA	P14625	TH211Y
Q6IN85_391	10.5917	NA	Q6IN85	TH211Y
Q13363_206	10.5895	3.78245	Q13363	TH211Y
Q9P2J5_240	10.5874	NA	Q9P2J5	TH211Y
P53396_825	10.5786	2.7566	P53396	TH211Y
P23743_102	10.5713	NA	P23743	TH211Y
P43694_132	10.5708	10.7559	P43694	TH211Y
P49916_97	10.5702	NA	P49916	TH211Y
O14802_1252	10.564	0	O14802	TH211Y
P31943_253	10.5627	NA	P31943	TH211Y
Q9HB71_71	10.5578	2.67298	Q9HB71	TH211Y
P51398_323	10.5551	NA	P51398	TH211Y
Q13838_266	10.5537	2.41765	Q13838	TH211Y
Q86VP6_784	10.5422	13.3753	Q86VP6	TH211Y
O75369_2069	10.5343	1.36242	O75369	TH211Y
Q6UXN9_91	10.5343	NA	Q6UXN9	TH211Y
P78527_3839	10.5217	13.4043	P78527	TH211Y
P30876_845	10.5191	NA	P30876	TH211Y
Q92945_681	10.5085	3.35631	Q92945	TH211Y
Q9BQE3_282	10.5018	NA	Q9BQE3	TH211Y
Q16181_319	10.5012	6.86147	Q16181	TH211Y
P35251_952	10.4955	7.69091	P35251	TH211Y
P04406_94	10.4778	NA	P04406	TH211Y
Q96PK6_226	10.4744	4.97937	Q96PK6	TH211Y
P31153_271	10.4672	NA	P31153	TH211Y
P48643_446	10.461	13.4902	P48643	TH211Y
P00966_113	10.4568	13.4961	P00966	TH211Y
Q14204_4252	10.455	NA	Q14204	TH211Y
Q9HB71_78	10.4499	1.79676	Q9HB71	TH211Y
P30419_117	10.4478	2.33881	P30419	TH211Y
P42345_412	10.4467	NA	P42345	TH211Y
Q14204_3552	10.4461	11.0319	Q14204	TH211Y
Q8N7H5_35	10.4431	13.5155	Q8N7H5	TH211Y
Q14204_2777	10.4417	2.9517	Q14204	TH211Y
Q6UB35_877	10.4327	0	Q6UB35	TH211Y
Q6P1J9_315	10.4326	13.5303	Q6P1J9	TH211Y
Q8TEQ6_534	10.4304	NA	Q8TEQ6	TH211Y
P40926_80	10.4178	0	P40926	TH211Y
Q8TC07_243	10.404	3.98808	Q8TC07	TH211Y
O75616_366	10.3943	NA	O75616	TH211Y
Q99832_263	10.3922	5.43273	Q99832	TH211Y
P46940_654	10.3863	8.98352	P46940	TH211Y
P34932_435	10.3844	NA	P34932	TH211Y
Q9Y265_405	10.3821	NA	Q9Y265	TH211Y
P26599_267	10.3783	NA	P26599	TH211Y
Q8NFC6_84	10.3761	13.6103	Q8NFC6	TH211Y
Q96IK1_82	10.3761	13.6103	Q96IK1	TH211Y
Q96ST3_349	10.3741	9.48499	Q96ST3	TH211Y
Q8IWS0_124	10.3688	6.37656	Q8IWS0	TH211Y
Q05209_64	10.3685	NA	Q05209	TH211Y
Q12931_327	10.3608	13.6318	Q12931	TH211Y
P85037_463	10.36	NA	P85037	TH211Y
O94903_252	10.3599	NA	O94903	TH211Y
P46940_287	10.3524	NA	P46940	TH211Y
P68363_103	10.3442	0.844455	P68363	TH211Y
Q13148_77	10.343	1.92124	Q13148	TH211Y
P54578_436	10.3348	7.67198	P54578	TH211Y
Q6N069_501	10.332	13.6726	Q6N069	TH211Y
P52272_681	10.3243	7.10694	P52272	TH211Y
P21266_45	10.3085	NA	P21266	TH211Y
Q9UQE7_168	10.3022	1.21978	Q9UQE7	TH211Y
P07814_357	10.3012	13.7162	P07814	TH211Y
P31939_303	10.2997	6.98879	P31939	TH211Y
O00571_283	10.2816	NA	O00571	TH211Y
P23258_86	10.2783	4.11839	P23258	TH211Y
Q9NRH3_86	10.2783	4.11839	Q9NRH3	TH211Y
P09874_309	10.2737	NA	P09874	TH211Y
Q9Y314_28	10.2451	13.7954	Q9Y314	TH211Y
Q5MIZ7_11	10.2409	NA	Q5MIZ7	TH211Y
Q9BWF3_194	10.2314	3.35911	Q9BWF3	TH211Y
Q13838_265	10.219	3.8854	Q13838	TH211Y
P41252_94	10.2142	NA	P41252	TH211Y
P04406_314	10.2076	0.151229	P04406	TH211Y
P26583_78	10.2028	NA	P26583	TH211Y
Q9NRZ9_347	10.2022	NA	Q9NRZ9	TH211Y
Q6P6C2_139	10.2003	4.4579	Q6P6C2	TH211Y
Q9Y4B6_808	10.198	13.8622	Q9Y4B6	TH211Y
Q9UBE0_161	10.1588	13.9176	Q9UBE0	TH211Y
O95373_416	10.1419	0.967267	O95373	TH211Y
P07437_340	10.1415	NA	P07437	TH211Y
Q9UFF9_260	10.1384	13.9464	Q9UFF9	TH211Y
P23921_717	10.1255	0	P23921	TH211Y
Q8TD26_749	10.1253	NA	Q8TD26	TH211Y
Q9P2D1_1256	10.1253	NA	Q9P2D1	TH211Y
P42765_182	10.1244	NA	P42765	TH211Y
Q13148_214	10.1161	7.1664	Q13148	TH211Y
Q99615_214	10.1063	13.9918	Q99615	TH211Y
Q9UHD8_278	10.1016	4.64547	Q9UHD8	TH211Y
Q9Y3F4_300	10.1005	NA	Q9Y3F4	TH211Y
P0DMV8_183	10.0728	4.45358	P0DMV8	TH211Y
Q9BXJ9_774	10.0668	NA	Q9BXJ9	TH211Y
P07814_290	10.0585	7.81676	P07814	TH211Y
Q14157_858	10.0546	NA	Q14157	TH211Y
Q9Y4L1_99	10.0464	7.88332	Q9Y4L1	TH211Y
P53618_105	10.0411	NA	P53618	TH211Y
P54577_52	10.0405	NA	P54577	TH211Y
Q15021_122	10.0403	1.25779	Q15021	TH211Y
O43747_231	10.0353	1.93141	O43747	TH211Y
Q6P3W7_150	10.0329	13.8007	Q6P3W7	TH211Y
Q13153_153	10.0323	14.0965	Q13153	TH211Y
P08708_20	10.0297	0	P08708	TH211Y
P41252_71	10.0292	NA	P41252	TH211Y
Q5UIP0_2361	10.025	14.1068	Q5UIP0	TH211Y
Q99541_82	10.0201	7.06309	Q99541	TH211Y
Q13123_288	10.02	6.85212	Q13123	TH211Y
Q14247_162	10.0172	NA	Q14247	TH211Y
P31943_372	10.0161	5.60945	P31943	TH211Y
P29692_26	10.0027	4.99735	P29692	TH211Y
P43686_111	9.99573	NA	P43686	TH211Y
Q9BQA1_36	9.99561	0	Q9BQA1	TH211Y
P62841_123	9.9954	NA	P62841	TH211Y
O14744_198	9.97795	NA	O14744	TH211Y
P08865_39	9.96344	0.340718	P08865	TH211Y
O43379_858	9.95665	NA	O43379	TH211Y
O14802_42	9.94441	NA	O14802	TH211Y
P41250_295	9.93483	NA	P41250	TH211Y
Q9P2J5_637	9.92869	4.46008	Q9P2J5	TH211Y
P30837_220	9.92206	8.94691	P30837	TH211Y
P33991_714	9.91961	2.04575	P33991	TH211Y
P78417_139	9.90615	1.82784	P78417	TH211Y
P49327_130	9.90436	7.74894	P49327	TH211Y
P22626_174	9.90103	NA	P22626	TH211Y
P49356_300	9.89058	5.49773	P49356	TH211Y
O95433_322	9.8801	0	O95433	TH211Y
P04406_45	9.87897	NA	P04406	TH211Y
P14618_105	9.87842	3.30767	P14618	TH211Y
Q9NQW7_128	9.87836	NA	Q9NQW7	TH211Y
P27797_308	9.87293	NA	P27797	TH211Y
Q9P2I0_461	9.86737	11.366	Q9P2I0	TH211Y
Q9BWJ5_43	9.85327	8.26047	Q9BWJ5	TH211Y
Q92616_774	9.85286	5.85845	Q92616	TH211Y
O00244_31	9.84354	3.31367	O00244	TH211Y
P23381_316	9.83558	5.7203	P23381	TH211Y
P14866_257	9.82809	NA	P14866	TH211Y
P10809_243	9.81675	NA	P10809	TH211Y
P45983_259	9.80855	0.492188	P45983	TH211Y
P30419_420	9.79815	NA	P30419	TH211Y
Q9P258_359	9.79643	3.012	Q9P258	TH211Y
Q9NRL2_1466	9.77059	9.23941	Q9NRL2	TH211Y
Q14980_1836	9.76492	4.73691	Q14980	TH211Y
P14618_148	9.76366	NA	P14618	TH211Y
Q14166_244	9.72949	2.83532	Q14166	TH211Y
O95104_64	9.71413	1.88854	O95104	TH211Y
Q9UPN6_64	9.71413	1.88854	Q9UPN6	TH211Y
P52272_64	9.70783	5.49306	P52272	TH211Y
Q01780_419	9.70414	NA	Q01780	TH211Y
Q9HB71_90	9.69829	6.94853	Q9HB71	TH211Y
Q9P2D1_2114	9.6876	NA	Q9P2D1	TH211Y
P49327_1842	9.68055	3.79302	P49327	TH211Y
P28340_894	9.6651	0	P28340	TH211Y
P62633_159	9.65579	4.88779	P62633	TH211Y
Q86V81_250	9.6525	NA	Q86V81	TH211Y
P48643_280	9.64915	5.39204	P48643	TH211Y
O95163_939	9.64715	5.59232	O95163	TH211Y
Q8WVV9_291	9.64359	8.0289	Q8WVV9	TH211Y
Q9Y2Z0_90	9.63445	7.27894	Q9Y2Z0	TH211Y
P17812_251	9.6292	13.4707	P17812	TH211Y
P34932_400	9.62656	NA	P34932	TH211Y
Q00839_525	9.62486	3.22223	Q00839	TH211Y
P11310_73	9.62264	3.63996	P11310	TH211Y
P06132_164	9.62118	2.22755	P06132	TH211Y
Q9Y4L1_487	9.61791	6.80139	Q9Y4L1	TH211Y
Q2TAL8_706	9.61315	0	Q2TAL8	TH211Y
Q6ZRS2_699	9.60912	5.09533	Q6ZRS2	TH211Y
Q9Y5X1_245	9.60775	12.6688	Q9Y5X1	TH211Y
P15170_96	9.60317	NA	P15170	TH211Y
O00541_392	9.60152	NA	O00541	TH211Y
P08758_256	9.59798	NA	P08758	TH211Y
Q05048_344	9.59669	0	Q05048	TH211Y
P09211_64	9.58817	7.44201	P09211	TH211Y
Q04837_73	9.57695	0	Q04837	TH211Y
Q7L0Y3_307	9.56373	NA	Q7L0Y3	TH211Y
P41252_803	9.5614	8.47675	P41252	TH211Y
P12270_422	9.55592	9.83458	P12270	TH211Y
P05455_175	9.55026	NA	P05455	TH211Y
P07900_284	9.54559	NA	P07900	TH211Y
P08238_276	9.54559	NA	P08238	TH211Y
P0DMV8_107	9.5359	8.45567	P0DMV8	TH211Y
O43684_207	9.53294	NA	O43684	TH211Y
Q9NTJ5_272	9.53273	NA	Q9NTJ5	TH211Y
Q9BWJ5_5	9.5322	NA	Q9BWJ5	TH211Y
Q14566_84	9.52746	4.87705	Q14566	TH211Y
P12270_735	9.52503	1.45581	P12270	TH211Y
P18621_4	9.52337	6.99721	P18621	TH211Y
Q9UNE7_49	9.51918	NA	Q9UNE7	TH211Y
Q99986_204	9.51078	2.86013	Q99986	TH211Y
Q13435_568	9.4922	NA	Q13435	TH211Y
Q9Y3Z3_287	9.49089	NA	Q9Y3Z3	TH211Y
Q14202_1079	9.48065	8.12048	Q14202	TH211Y
P06733_257	9.47975	6.04903	P06733	TH211Y
Q96IJ6_288	9.47643	8.84132	Q96IJ6	TH211Y
Q8N684_408	9.47251	5.29394	Q8N684	TH211Y
O43252_618	9.46945	NA	O43252	TH211Y
Q96PK6_665	9.46124	NA	Q96PK6	TH211Y
Q12948_25	9.4396	NA	Q12948	TH211Y
P25786_24	9.43576	NA	P25786	TH211Y
Q9UGV2_308	9.42814	NA	Q9UGV2	TH211Y
Q96J01_34	9.42788	8.88593	Q96J01	TH211Y
Q9Y371_80	9.41738	8.18747	Q9Y371	TH211Y
P11586_920	9.416	8.12725	P11586	TH211Y
P07814_1221	9.41144	7.76319	P07814	TH211Y
Q92616_241	9.40005	0.406515	Q92616	TH211Y
O15371_50	9.39506	1.90546	O15371	TH211Y
P07814_371	9.39454	5.84886	P07814	TH211Y
P14866_576	9.33183	9.36148	P14866	TH211Y
P35606_761	9.32186	5.63029	P35606	TH211Y
Q13363_203	9.30833	NA	Q13363	TH211Y
P11940_291	9.30477	8.84172	P11940	TH211Y
P54577_134	9.29673	6.21151	P54577	TH211Y
P78527_346	9.27618	NA	P78527	TH211Y
P35606_824	9.26846	NA	P35606	TH211Y
P23246_320	9.26684	8.83808	P23246	TH211Y
P60981_82	9.26132	NA	P60981	TH211Y
Q9BUF5_59	9.26062	NA	Q9BUF5	TH211Y
Q99459_232	9.255	8.92781	Q99459	TH211Y
Q14204_2901	9.24912	NA	Q14204	TH211Y
Q12905_358	9.24013	4.30722	Q12905	TH211Y
Q14204_3026	9.23103	5.24952	Q14204	TH211Y
Q9NQC3_1165	9.22971	6.99988	Q9NQC3	TH211Y
Q09028_132	9.20661	NA	Q09028	TH211Y
Q9BPW8_132	9.17005	9.22343	Q9BPW8	TH211Y
P78371_408	9.16828	NA	P78371	TH211Y
P12004_249	9.15645	3.29254	P12004	TH211Y
Q9BUK6_109	9.15266	7.1668	Q9BUK6	TH211Y
P52597_194	9.14376	5.65448	P52597	TH211Y
P53396_364	9.13988	NA	P53396	TH211Y
P56192_589	9.13772	6.76472	P56192	TH211Y
P43243_219	9.13571	NA	P43243	TH211Y
Q9BZX2_112	9.1246	0.817601	Q9BZX2	TH211Y
P62937_79	9.11068	4.34711	P62937	TH211Y
Q6NYC1_163	9.1006	6.95048	Q6NYC1	TH211Y
Q9H773_102	9.09788	6.27397	Q9H773	TH211Y
P04406_49	9.09311	NA	P04406	TH211Y
Q14C86_1207	9.08927	6.35084	Q14C86	TH211Y
P46734_75	9.08839	7.5406	P46734	TH211Y
Q92797_693	9.07685	8.58708	Q92797	TH211Y
Q8NI27_715	9.07223	0.454945	Q8NI27	TH211Y
Q7KZI7_53	9.0661	NA	Q7KZI7	TH211Y
O00571_343	9.06543	2.85663	O00571	TH211Y
P08243_488	9.05396	NA	P08243	TH211Y
P17812_468	9.05018	7.1689	P17812	TH211Y
P61081_86	9.04495	9.11193	P61081	TH211Y
Q05639_254	9.0374	8.0015	Q05639	TH211Y
Q12789_1651	9.0102	3.36055	Q12789	TH211Y
P27348_211	9.00062	NA	P27348	TH211Y
Q14683_1107	8.9959	12.3081	Q14683	TH211Y
Q96PK6_648	8.97963	0.573172	Q96PK6	TH211Y
P11177_132	8.97756	6.42667	P11177	TH211Y
Q93008_2455	8.97626	6.69134	Q93008	TH211Y
P40938_317	8.96931	NA	P40938	TH211Y
Q9BTY7_210	8.96597	NA	Q9BTY7	TH211Y
Q14008_1856	8.9597	NA	Q14008	TH211Y
Q8IWX8_897	8.94874	NA	Q8IWX8	TH211Y
Q9NVI1_487	8.9445	NA	Q9NVI1	TH211Y
P62140_304	8.9394	3.07391	P62140	TH211Y
Q96HE7_266	8.93676	NA	Q96HE7	TH211Y
P55769_11	8.93498	8.22982	P55769	TH211Y
Q86VP6_372	8.91045	NA	Q86VP6	TH211Y
Q9BVP2_358	8.90421	3.97194	Q9BVP2	TH211Y
P08243_69	8.89369	NA	P08243	TH211Y
P49458_18	8.89034	NA	P49458	TH211Y
P52789_865	8.88604	1.72935	P52789	TH211Y
P20618_158	8.88587	4.98069	P20618	TH211Y
O14818_145	8.88475	1.85776	O14818	TH211Y
Q5TFE4_170	8.88184	0.692619	Q5TFE4	TH211Y
P11586_852	8.88051	NA	P11586	TH211Y
Q14671_1123	8.87943	7.52428	Q14671	TH211Y
P55060_42	8.87585	10.8868	P55060	TH211Y
P52597_210	8.86627	2.5293	P52597	TH211Y
P04181_194	8.84073	4.29972	P04181	TH211Y
P24752_90	8.82186	NA	P24752	TH211Y
Q96RN5_542	8.81494	NA	Q96RN5	TH211Y
P48634_1922	8.8121	NA	P48634	TH211Y
P51991_140	8.79814	8.72115	P51991	TH211Y
P51970_32	8.78867	10.4983	P51970	TH211Y
P49327_2269	8.7881	4.48175	P49327	TH211Y
Q6P1Q9_70	8.78461	6.85933	Q6P1Q9	TH211Y
P35251_830	8.78338	0.375771	P35251	TH211Y
P33993_126	8.7801	6.09218	P33993	TH211Y
P17482_155	8.77723	7.57057	P17482	TH211Y
P49005_32	8.77591	NA	P49005	TH211Y
P50613_169	8.77011	NA	P50613	TH211Y
Q9Y5T5_295	8.76762	NA	Q9Y5T5	TH211Y
Q14204_4467	8.75249	0.657926	Q14204	TH211Y
Q9BVI4_230	8.74644	NA	Q9BVI4	TH211Y
P11586_901	8.74351	1.35191	P11586	TH211Y
Q96PK6_237	8.7405	6.95702	Q96PK6	TH211Y
Q14980_1876	8.73985	2.43852	Q14980	TH211Y
Q13535_2102	8.72657	NA	Q13535	TH211Y
Q9BYT8_446	8.71564	5.65384	Q9BYT8	TH211Y
Q9BPW8_87	8.68362	10.2025	Q9BPW8	TH211Y
Q9Y4C2_542	8.67236	10.7039	Q9Y4C2	TH211Y
P11142_115	8.66554	6.68048	P11142	TH211Y
Q00610_1218	8.66408	10.4176	Q00610	TH211Y
P41252_540	8.6524	2.56738	P41252	TH211Y
P19338_351	8.6517	2.57666	P19338	TH211Y
Q7L2J0_634	8.64249	4.56478	Q7L2J0	TH211Y
Q92616_2611	8.62994	3.94209	Q92616	TH211Y
O14802_53	8.62755	NA	O14802	TH211Y
Q9UI26_152	8.61804	5.71168	Q9UI26	TH211Y
P62847_81	8.61072	NA	P62847	TH211Y
O14654_112	8.61057	NA	O14654	TH211Y
P68032_71	8.60331	NA	P68032	TH211Y
P68133_71	8.60331	NA	P68133	TH211Y
P29401_563	8.59818	2.222	P29401	TH211Y
Q6ZRS2_853	8.59119	2.6498	Q6ZRS2	TH211Y
P07910_139	8.58264	NA	P07910	TH211Y
P06737_204	8.57264	4.34576	P06737	TH211Y
P62841_97	8.54632	NA	P62841	TH211Y
Q93009_243	8.53056	NA	Q93009	TH211Y
Q15003_635	8.52559	NA	Q15003	TH211Y
P78527_2972	8.52165	0	P78527	TH211Y
P28072_95	8.51652	NA	P28072	TH211Y
Q86XI2_466	8.51294	NA	Q86XI2	TH211Y
Q15003_428	8.50724	7.83512	Q15003	TH211Y
P62333_328	8.50314	9.17177	P62333	TH211Y
P31689_33	8.49767	7.54204	P31689	TH211Y
Q9GZZ9_53	8.48936	NA	Q9GZZ9	TH211Y
P54577_204	8.47654	8.5533	P54577	TH211Y
P25786_6	8.46066	7.49883	P25786	TH211Y
P61221_87	8.43705	NA	P61221	TH211Y
P53621_955	8.428	11.7854	P53621	TH211Y
O14802_714	8.42218	9.68257	O14802	TH211Y
Q13618_512	8.4074	10.8869	Q13618	TH211Y
Q9UNF1_326	8.4058	NA	Q9UNF1	TH211Y
Q9HB71_125	8.40481	3.8601	Q9HB71	TH211Y
P30084_264	8.39923	3.55759	P30084	TH211Y
P23526_39	8.39246	NA	P23526	TH211Y
P53611_26	8.38942	9.76617	P53611	TH211Y
P22102_310	8.38853	NA	P22102	TH211Y
P31153_92	8.3717	4.54284	P31153	TH211Y
O60264_947	8.37118	11.3716	O60264	TH211Y
O00541_114	8.36907	NA	O00541	TH211Y
Q9UN37_290	8.3655	7.51996	Q9UN37	TH211Y
P28340_809	8.34388	NA	P28340	TH211Y
Q12948_548	8.32836	NA	Q12948	TH211Y
P43487_103	8.32399	NA	P43487	TH211Y
P54136_516	8.32278	6.11589	P54136	TH211Y
O95757_30	8.32231	NA	O95757	TH211Y
P68104_254	8.3186	5.96755	P68104	TH211Y
Q9C0J8_88	8.31204	0	Q9C0J8	TH211Y
P53618_250	8.31132	NA	P53618	TH211Y
Q01081_78	8.30942	6.19809	Q01081	TH211Y
Q15555_114	8.30258	NA	Q15555	TH211Y
Q13042_467	8.29486	10.2977	Q13042	TH211Y
Q8IX18_532	8.28793	NA	Q8IX18	TH211Y
P26368_269	8.27836	3.11574	P26368	TH211Y
P06733_280	8.27357	4.76745	P06733	TH211Y
P60709_198	8.26395	NA	P60709	TH211Y
Q15019_258	8.26124	NA	Q15019	TH211Y
Q13263_133	8.2384	0.774262	Q13263	TH211Y
O94906_732	8.23624	6.37777	O94906	TH211Y
P26641_416	8.23329	6.93406	P26641	TH211Y
P29692_18	8.22915	1.14613	P29692	TH211Y
Q92616_1210	8.21807	NA	Q92616	TH211Y
P62805_89	8.20992	4.74928	P62805	TH211Y
O15226_391	8.20095	NA	O15226	TH211Y
Q9NRZ9_302	8.19985	0	Q9NRZ9	TH211Y
Q9Y285_350	8.18805	7.25424	Q9Y285	TH211Y
P15880_250	8.16737	3.19571	P15880	TH211Y
Q9HB71_181	8.16477	4.95991	Q9HB71	TH211Y
Q9BXJ9_66	8.15794	NA	Q9BXJ9	TH211Y
Q9Y230_446	8.15685	5.09283	Q9Y230	TH211Y
P14625_401	8.1555	7.02041	P14625	TH211Y
P57740_423	8.14777	4.47963	P57740	TH211Y
Q92598_643	8.14306	5.74222	Q92598	TH211Y
P23258_273	8.143	8.30225	P23258	TH211Y
Q9NRH3_273	8.143	8.30225	Q9NRH3	TH211Y
O43347_232	8.14184	8.19725	O43347	TH211Y
Q6NYC1_150	8.13306	NA	Q6NYC1	TH211Y
Q8IZH2_1162	8.13052	NA	Q8IZH2	TH211Y
Q02750_240	8.1118	NA	Q02750	TH211Y
Q9P2J5_156	8.11087	NA	Q9P2J5	TH211Y
Q12834_144	8.10903	1.31668	Q12834	TH211Y
P11172_16	8.10544	NA	P11172	TH211Y
Q9NVS9_157	8.10453	7.68241	Q9NVS9	TH211Y
O00764_49	8.09884	NA	O00764	TH211Y
Q29RF7_1121	8.09769	3.73297	Q29RF7	TH211Y
O14802_721	8.0769	NA	O14802	TH211Y
Q96I24_53	8.07427	6.73265	Q96I24	TH211Y
Q92945_290	8.04526	5.70289	Q92945	TH211Y
Q8IZH2_1248	8.0448	NA	Q8IZH2	TH211Y
P28340_924	8.03739	3.52368	P28340	TH211Y
P50395_245	8.03466	7.83124	P50395	TH211Y
P49189_476	8.0337	8.73998	P49189	TH211Y
Q96C86_113	8.02648	NA	Q96C86	TH211Y
P14868_29	8.02562	2.30767	P14868	TH211Y
P11142_545	8.01116	5.49184	P11142	TH211Y
O75534_37	8.00342	5.26671	O75534	TH211Y
O00764_77	8.00053	9.50016	O00764	TH211Y
Q92616_252	7.98942	1.48705	Q92616	TH211Y
Q99541_216	7.98771	NA	Q99541	TH211Y
P07355_24	7.98119	8.37358	P07355	TH211Y
Q9Y450_656	7.97693	NA	Q9Y450	TH211Y
P50213_186	7.96674	2.61186	P50213	TH211Y
P0C0S5_61	7.95468	NA	P0C0S5	TH211Y
P23743_544	7.95432	2.20652	P23743	TH211Y
Q13547_358	7.95226	3.18376	Q13547	TH211Y
Q9BXP5_624	7.94308	9.65639	Q9BXP5	TH211Y
P17858_634	7.94202	NA	P17858	TH211Y
P45954_283	7.93894	5.95108	P45954	TH211Y
Q9UQ80_309	7.93121	1.51026	Q9UQ80	TH211Y
P13804_235	7.92497	8.1533	P13804	TH211Y
O14802_886	7.92199	NA	O14802	TH211Y
Q86U86_217	7.91797	6.15022	Q86U86	TH211Y
O43837_128	7.91715	NA	O43837	TH211Y
P24928_1308	7.90835	8.13046	P24928	TH211Y
P29401_564	7.90502	2.5665	P29401	TH211Y
Q9P2J5_531	7.88986	NA	Q9P2J5	TH211Y
P62249_95	7.88503	NA	P62249	TH211Y
Q92616_2505	7.8819	4.52984	Q92616	TH211Y
P49916_767	7.87854	3.51331	P49916	TH211Y
P14174_76	7.86963	8.1084	P14174	TH211Y
Q96AE4_58	7.84942	5.37968	Q96AE4	TH211Y
P31150_245	7.84647	0	P31150	TH211Y
Q10567_136	7.8462	8.55464	Q10567	TH211Y
P68371_36	7.841	5.17147	P68371	TH211Y
P62249_115	7.83975	NA	P62249	TH211Y
P12004_133	7.83785	NA	P12004	TH211Y
Q15019_105	7.83667	2.09603	Q15019	TH211Y
Q96RP9_235	7.81878	NA	Q96RP9	TH211Y
Q9UBT2_526	7.81131	NA	Q9UBT2	TH211Y
P42704_160	7.80855	5.43813	P42704	TH211Y
Q9P2J5_369	7.80792	4.22262	Q9P2J5	TH211Y
Q13263_755	7.79031	5.19207	Q13263	TH211Y
Q6UXN9_102	7.78467	2.51837	Q6UXN9	TH211Y
P23921_374	7.78439	NA	P23921	TH211Y
P08243_92	7.772	NA	P08243	TH211Y
P04792_54	7.76824	7.23252	P04792	TH211Y
P30876_1018	7.75629	7.22783	P30876	TH211Y
O43252_518	7.75469	NA	O43252	TH211Y
Q15126_51	7.75446	10.0533	Q15126	TH211Y
P22314_425	7.74885	0.868241	P22314	TH211Y
P49588_690	7.7466	NA	P49588	TH211Y
P11586_371	7.73199	4.94611	P11586	TH211Y
P54136_536	7.72051	NA	P54136	TH211Y
Q14008_1394	7.71495	0	Q14008	TH211Y
O60502_729	7.70736	8.58281	O60502	TH211Y
Q9Y285_488	7.70423	4.29116	Q9Y285	TH211Y
Q8NI27_1067	7.70207	0.867602	Q8NI27	TH211Y
P30876_753	7.70159	1.12361	P30876	TH211Y
A6NIH7_83	7.69775	0	A6NIH7	TH211Y
Q96T76_289	7.67491	NA	Q96T76	TH211Y
Q14694_706	7.67432	NA	Q14694	TH211Y
Q96CX2_214	7.67103	8.41151	Q96CX2	TH211Y
P78527_3828	7.67028	4.11294	P78527	TH211Y
P13674_289	7.65237	NA	P13674	TH211Y
[truncated: 1,969 more rows]

## Sheet: TH214_Y_sol_hDGKA_HEK
site	Ratio	Std	uni	treatment
O14654_743	20	NA	O14654	TH214Y
O14654_808	20	NA	O14654	TH214Y
O15217_9	20	11.5174	O15217	TH214Y
O15355_364	20	NA	O15355	TH214Y
O43399_106	20	0	O43399	TH214Y
O43615_265	20	NA	O43615	TH214Y
O43684_53	20	NA	O43684	TH214Y
O43837_340	20	0	O43837	TH214Y
O75369_596	20	0	O75369	TH214Y
O75390_381	20	0	O75390	TH214Y
O75521_169	20	NA	O75521	TH214Y
O75832_138	20	NA	O75832	TH214Y
O95197_1004	20	4.46208	O95197	TH214Y
O95757_692	20	NA	O95757	TH214Y
O96019_186	20	NA	O96019	TH214Y
P00492_105	20	0	P00492	TH214Y
P00558_196	20	0	P00558	TH214Y
P04350_59	20	9.97192	P04350	TH214Y
P04406_276	20	0	P04406	TH214Y
P04406_320	20	1.36589	P04406	TH214Y
P06576_230	20	0	P06576	TH214Y
P06576_247	20	0	P06576	TH214Y
P06733_270	20	11.3897	P06733	TH214Y
P06733_407	20	0	P06733	TH214Y
P06733_44	20	0	P06733	TH214Y
P06733_57	20	3.16175	P06733	TH214Y
P06744_392	20	11.1766	P06744	TH214Y
P07195_173	20	0	P07195	TH214Y
P07195_84	20	5.39402	P07195	TH214Y
P07437_310	20	9.20042	P07437	TH214Y
P07437_36	20	1.69531	P07437	TH214Y
P07437_50	20	0	P07437	TH214Y
P07437_51	20	9.07345	P07437	TH214Y
P07437_59	20	0	P07437	TH214Y
P07900_480	20	0	P07900	TH214Y
P07900_61	20	NA	P07900	TH214Y
P08238_192	20	0	P08238	TH214Y
P08238_211	20	7.98436	P08238	TH214Y
P08238_457	20	0	P08238	TH214Y
P08238_472	20	0	P08238	TH214Y
P08238_596	20	8.46978	P08238	TH214Y
P08708_53	20	7.98483	P08708	TH214Y
P08758_308	20	0	P08758	TH214Y
P09429_16	20	NA	P09429	TH214Y
P09651_357	20	0	P09651	TH214Y
P09651_366	20	0	P09651	TH214Y
P0DMV8_115	20	7.9076	P0DMV8	TH214Y
P10809_223	20	2.49215	P10809	TH214Y
P10809_503	20	0	P10809	TH214Y
P11142_107	20	0.600473	P11142	TH214Y
P11142_149	20	0	P11142	TH214Y
P11177_334	20	0	P11177	TH214Y
P12277_39	20	0	P12277	TH214Y
P13010_316	20	0	P13010	TH214Y
P13667_595	20	NA	P13667	TH214Y
P13804_105	20	NA	P13804	TH214Y
P14174_76	20	1.97901	P14174	TH214Y
P14314_465	20	0	P14314	TH214Y
P14618_161	20	0	P14618	TH214Y
P14618_390	20	8.88517	P14618	TH214Y
P14618_83	20	0	P14618	TH214Y
P14625_355	20	NA	P14625	TH214Y
P15880_133	20	10.1628	P15880	TH214Y
P15880_248	20	5.9351	P15880	TH214Y
P15880_250	20	7.16523	P15880	TH214Y
P17812_554	20	NA	P17812	TH214Y
P17858_674	20	0	P17858	TH214Y
P17987_131	20	NA	P17987	TH214Y
P18669_142	20	0	P18669	TH214Y
P18669_92	20	0	P18669	TH214Y
P21796_225	20	0	P21796	TH214Y
P22314_873	20	NA	P22314	TH214Y
P22626_174	20	7.5461	P22626	TH214Y
P23246_527	20	NA	P23246	TH214Y
P23284_133	20	0	P23284	TH214Y
P23526_143	20	NA	P23526	TH214Y
P23526_165	20	0	P23526	TH214Y
P23528_117	20	0	P23528	TH214Y
P23528_82	20	10.9394	P23528	TH214Y
P23743_240	20	0	P23743	TH214Y
P25398_127	20	0	P25398	TH214Y
P25787_167	20	0	P25787	TH214Y
P26368_469	20	0	P26368	TH214Y
P26639_540	20	0	P26639	TH214Y
P26641_145	20	NA	P26641	TH214Y
P26641_416	20	7.39655	P26641	TH214Y
P27797_109	20	0	P27797	TH214Y
P29692_18	20	0	P29692	TH214Y
P29692_26	20	10.3143	P29692	TH214Y
P30101_356	20	0	P30101	TH214Y
P30153_495	20	0	P30153	TH214Y
P30837_442	20	NA	P30837	TH214Y
P31153_235	20	7.37982	P31153	TH214Y
P31689_381	20	0	P31689	TH214Y
P31943_266	20	0	P31943	TH214Y
P31943_276	20	NA	P31943	TH214Y
P31943_82	20	6.24369	P31943	TH214Y
P31946_120	20	0	P31946	TH214Y
P33993_345	20	10.3408	P33993	TH214Y
P33993_539	20	0	P33993	TH214Y
P34897_96	20	11.1783	P34897	TH214Y
P36578_161	20	0	P36578	TH214Y
P37802_192	20	0	P37802	TH214Y
P38646_652	20	0	P38646	TH214Y
P39019_54	20	5.04104	P39019	TH214Y
P40926_56	20	6.21262	P40926	TH214Y
P40939_271	20	0	P40939	TH214Y
P42765_182	20	0	P42765	TH214Y
P43487_103	20	NA	P43487	TH214Y
P48735_274	20	NA	P48735	TH214Y
P49327_2034	20	1.03414	P49327	TH214Y
P49327_289	20	NA	P49327	TH214Y
P49411_122	20	0	P49411	TH214Y
P50502_213	20	0	P50502	TH214Y
P50990_30	20	1.08453	P50990	TH214Y
P52597_266	20	0	P52597	TH214Y
P52597_272	20	0	P52597	TH214Y
P53621_249	20	NA	P53621	TH214Y
P55060_278	20	0	P55060	TH214Y
P55786_164	20	0	P55786	TH214Y
P55786_908	20	0	P55786	TH214Y
P60709_198	20	NA	P60709	TH214Y
P60709_91	20	0	P60709	TH214Y
P60842_356	20	0	P60842	TH214Y
P60900_105	20	7.23438	P60900	TH214Y
P61081_172	20	0	P61081	TH214Y
P61978_72	20	NA	P61978	TH214Y
P61981_123	20	0	P61981	TH214Y
P61981_154	20	0	P61981	TH214Y
P62258_131	20	5.97646	P62258	TH214Y
P62263_72	20	4.89126	P62263	TH214Y
P62266_134	20	0	P62266	TH214Y
P62805_89	20	0	P62805	TH214Y
P62841_123	20	NA	P62841	TH214Y
P62847_81	20	9.29575	P62847	TH214Y
P62899_25	20	NA	P62899	TH214Y
P62906_107	20	0	P62906	TH214Y
P62979_105	20	0	P62979	TH214Y
P63244_140	20	NA	P63244	TH214Y
P68363_108	20	2.8006	P68363	TH214Y
P68363_262	20	0	P68363	TH214Y
P68363_272	20	0	P68363	TH214Y
P68363_312	20	NA	P68363	TH214Y
P68371_51	20	NA	P68371	TH214Y
P68371_59	20	2.25925	P68371	TH214Y
P83731_55	20	5.70046	P83731	TH214Y
Q00610_1451	20	0	Q00610	TH214Y
Q00610_634	20	0	Q00610	TH214Y
Q00839_613	20	5.8289	Q00839	TH214Y
Q00839_802	20	10.7157	Q00839	TH214Y
Q01518_419	20	0	Q01518	TH214Y
Q02790_111	20	2.65958	Q02790	TH214Y
Q02790_225	20	9.26957	Q02790	TH214Y
Q07666_145	20	0	Q07666	TH214Y
Q12931_327	20	0	Q12931	TH214Y
Q13509_310	20	0	Q13509	TH214Y
Q13547_358	20	NA	Q13547	TH214Y
Q13885_51	20	0	Q13885	TH214Y
Q14204_4252	20	0	Q14204	TH214Y
Q14974_529	20	NA	Q14974	TH214Y
Q15366_182	20	10.9676	Q15366	TH214Y
Q16539_182	20	0	Q16539	TH214Y
Q5JRX3_383	20	5.72511	Q5JRX3	TH214Y
Q5TFE4_310	20	5.32264	Q5TFE4	TH214Y
Q5VTE0_167	20	0	Q5VTE0	TH214Y
Q5VTE0_29	20	0.642242	Q5VTE0	TH214Y
Q5VTE0_418	20	2.31915	Q5VTE0	TH214Y
Q7L0Y3_307	20	NA	Q7L0Y3	TH214Y
Q8NFI4_213	20	0	Q8NFI4	TH214Y
Q92616_252	20	NA	Q92616	TH214Y
Q92945_625	20	0.55041	Q92945	TH214Y
Q92945_626	20	0	Q92945	TH214Y
Q92945_644	20	NA	Q92945	TH214Y
Q969Z0_281	20	0	Q969Z0	TH214Y
Q96F45_602	20	0	Q96F45	TH214Y
Q99471_43	20	0	Q99471	TH214Y
Q99497_139	20	0	Q99497	TH214Y
Q99729_240	20	0	Q99729	TH214Y
Q99807_61	20	0	Q99807	TH214Y
Q99832_111	20	0	Q99832	TH214Y
Q99832_358	20	0	Q99832	TH214Y
Q9BQA1_122	20	NA	Q9BQA1	TH214Y
Q9HA47_205	20	NA	Q9HA47	TH214Y
Q9HB71_181	20	0	Q9HB71	TH214Y
Q9NQC3_1091	20	0.741515	Q9NQC3	TH214Y
Q9NUJ1_84	20	0	Q9NUJ1	TH214Y
Q9UMX5_137	20	8.88226	Q9UMX5	TH214Y
Q9Y223_156	20	0	Q9Y223	TH214Y
Q9Y237_71	20	NA	Q9Y237	TH214Y
Q9Y265_454	20	0	Q9Y265	TH214Y
Q9Y3I0_184	20	NA	Q9Y3I0	TH214Y
Q9Y6C9_95	20	0	Q9Y6C9	TH214Y
P00338_127	19.9972	0.00396954	P00338	TH214Y
O15355_74	19.9866	NA	O15355	TH214Y
P62805_73	19.9303	9.57211	P62805	TH214Y
P53621_628	19.9159	0.118893	P53621	TH214Y
Q9BUF5_50	19.8988	0.143076	Q9BUF5	TH214Y
P60709_53	19.8686	NA	P60709	TH214Y
P06733_200	19.8244	0.2028	P06733	TH214Y
P60174_202	19.7656	0.331456	P60174	TH214Y
P00338_239	19.6069	0.270673	P00338	TH214Y
P62854_62	19.4882	10.632	P62854	TH214Y
P68363_224	19.4704	NA	P68363	TH214Y
P62249_115	19.4539	0.772236	P62249	TH214Y
P25705_311	19.2701	NA	P25705	TH214Y
P26641_24	19.2071	1.12127	P26641	TH214Y
P11021_65	19.1802	1.15934	P11021	TH214Y
P06744_144	19.0889	1.28855	P06744	TH214Y
P11940_364	19.0121	1.39706	P11940	TH214Y
O43765_182	18.9288	NA	O43765	TH214Y
P04080_97	18.7808	1.72417	P04080	TH214Y
Q9NR45_71	18.7687	1.74139	Q9NR45	TH214Y
P60842_48	18.7068	1.49323	P60842	TH214Y
P55072_495	18.6415	1.92121	P55072	TH214Y
O95433_322	18.6313	1.93569	O95433	TH214Y
P10809_385	18.529	5.22292	P10809	TH214Y
Q9BPW8_72	18.3282	NA	Q9BPW8	TH214Y
Q15393_1166	18.214	2.52572	Q15393	TH214Y
P19623_278	18.1961	2.55108	P19623	TH214Y
Q7Z4W1_149	18.1502	2.61607	Q7Z4W1	TH214Y
P0DMV8_545	18.1357	NA	P0DMV8	TH214Y
P56192_201	18.1102	2.67261	P56192	TH214Y
P14625_429	18.083	2.21352	P14625	TH214Y
P06733_257	18.0792	3.26297	P06733	TH214Y
P60842_197	18.0695	2.73013	P60842	TH214Y
P08238_301	17.9983	10.1951	P08238	TH214Y
Q8IWS0_301	17.9667	NA	Q8IWS0	TH214Y
Q9H773_102	17.9043	2.41991	Q9H773	TH214Y
Q96BY7_649	17.8116	7.9682	Q96BY7	TH214Y
P49321_540	17.7265	2.18538	P49321	TH214Y
P06744_351	17.6107	3.37903	P06744	TH214Y
Q9Y678_531	17.593	3.40398	Q9Y678	TH214Y
Q05639_177	17.5769	3.11757	Q05639	TH214Y
P49327_2269	17.4622	3.58904	P49327	TH214Y
Q16543_331	17.3841	3.69938	Q16543	TH214Y
P14735_302	17.3768	3.70972	P14735	TH214Y
P08238_430	17.3606	7.66026	P08238	TH214Y
P60709_306	17.346	6.91245	P60709	TH214Y
P10809_243	17.2037	3.95453	P10809	TH214Y
P63010_121	17.163	NA	P63010	TH214Y
Q10567_121	17.163	NA	Q10567	TH214Y
P07737_129	17.1526	2.81132	P07737	TH214Y
Q09028_132	17.1469	3.04062	Q09028	TH214Y
P04350_106	16.9431	NA	P04350	TH214Y
Q96A49_60	16.9282	10.5563	Q96A49	TH214Y
Q5VTE0_177	16.8398	1.45293	Q5VTE0	TH214Y
P10809_90	16.8366	NA	P10809	TH214Y
Q86VP6_372	16.8007	0.822378	Q86VP6	TH214Y
P07437_106	16.7454	NA	P07437	TH214Y
P40429_137	16.54	3.99529	P40429	TH214Y
P31689_376	16.4979	4.95271	P31689	TH214Y
P00558_161	16.4877	2.40667	P00558	TH214Y
P09429_109	16.4576	4.2496	P09429	TH214Y
P11142_183	16.4124	4.93626	P11142	TH214Y
P23743_22	16.3778	2.30449	P23743	TH214Y
P50991_24	16.2883	NA	P50991	TH214Y
P49773_94	16.2236	5.34067	P49773	TH214Y
P62241_113	16.2211	3.18557	P62241	TH214Y
O43684_65	16.1965	NA	O43684	TH214Y
P09211_8	16.1787	4.46054	P09211	TH214Y
Q9BUF5_51	16.142	5.45607	Q9BUF5	TH214Y
P14618_175	16.0674	5.56151	P14618	TH214Y
P07437_222	16.0362	0.0638531	P07437	TH214Y
P12268_509	15.9387	5.74358	P12268	TH214Y
P07900_604	15.9378	4.69062	P07900	TH214Y
P07900_434	15.922	0.515842	P07900	TH214Y
P07900_627	15.8698	0.698332	P07900	TH214Y
O00299_209	15.8541	4.75031	O00299	TH214Y
P09651_167	15.8442	4.91663	P09651	TH214Y
P04181_69	15.8	5.93974	P04181	TH214Y
P0DMV8_183	15.6007	7.80987	P0DMV8	TH214Y
P62913_170	15.535	1.57353	P62913	TH214Y
P41252_608	15.5218	9.71144	P41252	TH214Y
P52565_128	15.4944	6.37187	P52565	TH214Y
P13639_730	15.4929	1.33832	P13639	TH214Y
O95163_1182	15.4324	3.23922	O95163	TH214Y
P68363_399	15.4314	1.92861	P68363	TH214Y
P60709_188	15.3327	2.85061	P60709	TH214Y
P17987_121	15.3303	4.13641	P17987	TH214Y
Q00839_257	15.2766	4.73584	Q00839	TH214Y
P23743_258	15.2651	3.003	P23743	TH214Y
P08758_94	15.2554	0.730177	P08758	TH214Y
O43684_42	15.2289	0	O43684	TH214Y
P30837_373	15.2133	NA	P30837	TH214Y
P23528_140	15.2039	1.64549	P23528	TH214Y
Q9BRA2_99	15.1772	NA	Q9BRA2	TH214Y
O00410_853	15.1539	6.85336	O00410	TH214Y
Q13509_106	15.118	3.579	Q13509	TH214Y
P09211_80	15.0732	5.68901	P09211	TH214Y
P04406_314	15.0196	5.3004	P04406	TH214Y
Q9H857_457	14.9504	7.14115	Q9H857	TH214Y
P08238_56	14.9158	5.03688	P08238	TH214Y
O14979_295	14.909	NA	O14979	TH214Y
Q00839_824	14.8878	7.2298	Q00839	TH214Y
Q14126_476	14.8862	7.23206	Q14126	TH214Y
P38646_161	14.8308	7.31036	P38646	TH214Y
P08238_619	14.8047	NA	P08238	TH214Y
P55209_96	14.7803	4.99861	P55209	TH214Y
P38606_464	14.7708	10.1536	P38606	TH214Y
P23528_85	14.7689	6.34086	P23528	TH214Y
P46782_188	14.7584	4.46391	P46782	TH214Y
O15355_405	14.675	7.53062	O15355	TH214Y
P62937_79	14.5991	1.2167	P62937	TH214Y
P11142_41	14.5917	7.24258	P11142	TH214Y
Q13263_208	14.5802	NA	Q13263	TH214Y
Q13547_87	14.5106	3.33144	Q13547	TH214Y
P49327_2439	14.4768	7.81096	P49327	TH214Y
P62937_48	14.4298	2.59387	P62937	TH214Y
P30101_222	14.324	4.93739	P30101	TH214Y
P08243_536	14.3061	3.64688	P08243	TH214Y
P11310_73	14.2421	NA	P11310	TH214Y
P40926_161	14.1918	1.51572	P40926	TH214Y
Q92616_2186	14.1733	NA	Q92616	TH214Y
P09211_64	14.1682	8.24734	P09211	TH214Y
P50990_173	14.1588	5.86578	P50990	TH214Y
O94776_437	14.1373	NA	O94776	TH214Y
Q13200_400	14.1329	8.29734	Q13200	TH214Y
P62258_152	14.1174	0.102629	P62258	TH214Y
Q9BQE3_282	14.1133	0	Q9BQE3	TH214Y
P13639_639	14.08	NA	P13639	TH214Y
P31946_50	13.9742	4.72459	P31946	TH214Y
P61981_49	13.9742	4.72459	P61981	TH214Y
P63104_48	13.9742	4.72459	P63104	TH214Y
P50213_137	13.9616	8.53958	P50213	TH214Y
P42677_31	13.9247	8.59181	P42677	TH214Y
P62942_27	13.9045	8.62037	P62942	TH214Y
P68363_103	13.8673	2.91966	P68363	TH214Y
P05141_81	13.854	NA	P05141	TH214Y
P68032_93	13.8518	NA	P68032	TH214Y
P11142_134	13.7819	3.68535	P11142	TH214Y
P63104_118	13.7722	NA	P63104	TH214Y
P49411_133	13.6895	8.92444	P49411	TH214Y
P04181_85	13.6744	8.94569	P04181	TH214Y
P49321_635	13.6595	3.15862	P49321	TH214Y
O75844_253	13.5431	5.44152	O75844	TH214Y
P11142_15	13.5398	9.13607	P11142	TH214Y
P23743_19	13.5155	3.74862	P23743	TH214Y
P30086_81	13.4533	3.29281	P30086	TH214Y
P11586_852	13.3167	2.79303	P11586	TH214Y
P19338_351	13.314	3.38661	P19338	TH214Y
Q12931_317	13.2469	7.79778	Q12931	TH214Y
Q14566_111	13.2235	NA	Q14566	TH214Y
Q9NUJ1_87	13.2027	9.61288	Q9NUJ1	TH214Y
P07900_465	13.1794	9.25407	P07900	TH214Y
P63173_43	13.178	6.74544	P63173	TH214Y
P27797_150	13.1419	3.44306	P27797	TH214Y
Q9Y4L1_116	13.0275	0.169871	Q9Y4L1	TH214Y
P13797_127	12.9543	9.96411	P13797	TH214Y
P60900_96	12.8712	7.68573	P60900	TH214Y
P63244_194	12.8614	NA	P63244	TH214Y
P62258_49	12.8348	5.5458	P62258	TH214Y
P21912_128	12.8168	10.1586	P21912	TH214Y
Q5VTE0_141	12.7648	5.01282	Q5VTE0	TH214Y
P04075_328	12.7197	3.95542	P04075	TH214Y
P10768_67	12.7141	1.85549	P10768	TH214Y
P00558_324	12.712	0.774654	P00558	TH214Y
P07437_200	12.6672	10.3701	P07437	TH214Y
P49327_2454	12.6611	NA	P49327	TH214Y
O00567_152	12.5901	10.4792	O00567	TH214Y
Q8IZ73_177	12.5828	2.91846	Q8IZ73	TH214Y
P60709_169	12.543	2.73002	P60709	TH214Y
P09104_25	12.5324	6.39589	P09104	TH214Y
P07900_216	12.5097	3.24677	P07900	TH214Y
P46781_13	12.5029	4.34626	P46781	TH214Y
Q9BWD1_237	12.4982	NA	Q9BWD1	TH214Y
P52565_51	12.4928	8.66854	P52565	TH214Y
P08238_520	12.4781	3.97208	P08238	TH214Y
P13667_392	12.3915	10.7601	P13667	TH214Y
P00918_40	12.3811	NA	P00918	TH214Y
P62847_76	12.3772	NA	P62847	TH214Y
P60709_362	12.3727	4.50195	P60709	TH214Y
P62701_149	12.3398	2.67901	P62701	TH214Y
P04181_50	12.1281	5.88639	P04181	TH214Y
P58546_21	12.1147	4.1098	P58546	TH214Y
Q13263_242	12.0882	NA	Q13263	TH214Y
P48643_280	11.905	5.65615	P48643	TH214Y
Q14103_116	11.8889	NA	Q14103	TH214Y
P27797_57	11.8566	5.90724	P27797	TH214Y
P07437_159	11.8485	NA	P07437	TH214Y
Q14204_2792	11.8182	11.5709	Q14204	TH214Y
P07900_492	11.7994	2.75384	P07900	TH214Y
P49368_303	11.7791	11.6261	P49368	TH214Y
O15355_160	11.7277	11.6988	O15355	TH214Y
Q9NRR5_279	11.718	4.95364	Q9NRR5	TH214Y
Q9UMX0_269	11.718	4.95364	Q9UMX0	TH214Y
P06748_29	11.6993	9.05928	P06748	TH214Y
P52272_681	11.6966	NA	P52272	TH214Y
P10768_202	11.6499	2.43793	P10768	TH214Y
P38646_128	11.6262	4.94549	P38646	TH214Y
P68032_71	11.6147	NA	P68032	TH214Y
P62280_92	11.6063	NA	P62280	TH214Y
P31943_180	11.5416	4.38272	P31943	TH214Y
Q14103_244	11.4892	5.49242	Q14103	TH214Y
P46778_65	11.4769	12.0535	P46778	TH214Y
O43399_126	11.4584	12.0797	O43399	TH214Y
P0DMV8_525	11.4453	3.02463	P0DMV8	TH214Y
P50990_47	11.4343	7.06971	P50990	TH214Y
P61247_155	11.415	NA	P61247	TH214Y
Q8N8N7_51	11.3832	12.186	Q8N8N7	TH214Y
P13797_450	11.3556	9.76705	P13797	TH214Y
P68363_408	11.3528	NA	P68363	TH214Y
P62910_60	11.3368	5.46	P62910	TH214Y
P27348_48	11.3347	7.66725	P27348	TH214Y
Q9HCC0_413	11.3328	NA	Q9HCC0	TH214Y
P04792_23	11.2985	3.23965	P04792	TH214Y
Q9Y285_305	11.2721	0.689869	Q9Y285	TH214Y
Q9BQA1_36	11.2193	NA	Q9BQA1	TH214Y
O75347_94	11.2184	7.27055	O75347	TH214Y
Q9BV20_205	11.1898	12.4596	Q9BV20	TH214Y
P43034_102	11.185	12.4663	P43034	TH214Y
P04075_302	11.1182	12.5608	P04075	TH214Y
P24534_62	11.0976	1.10946	P24534	TH214Y
P42766_78	11.0777	NA	P42766	TH214Y
P24534_126	11.0452	5.29317	P24534	TH214Y
Q00839_669	11.0184	NA	Q00839	TH214Y
Q00325_208	11.0098	12.7141	Q00325	TH214Y
P63173_41	10.9805	4.89359	P63173	TH214Y
P68363_24	10.9609	NA	P68363	TH214Y
P55209_106	10.9373	4.10866	P55209	TH214Y
Q02790_113	10.9332	7.33974	Q02790	TH214Y
P52597_276	10.9183	3.89686	P52597	TH214Y
P10809_227	10.9016	7.61387	P10809	TH214Y
Q13283_40	10.8896	6.2041	Q13283	TH214Y
P78371_439	10.836	NA	P78371	TH214Y
P04181_55	10.8221	0.887488	P04181	TH214Y
P62241_83	10.8171	1.79303	P62241	TH214Y
P34897_176	10.8163	12.9877	P34897	TH214Y
P18669_26	10.8129	1.15695	P18669	TH214Y
Q9NSE4_465	10.7973	NA	Q9NSE4	TH214Y
P13804_84	10.7871	0.125943	P13804	TH214Y
Q9Y673_74	10.7792	7.53492	Q9Y673	TH214Y
P12004_249	10.7661	0.124993	P12004	TH214Y
P13639_265	10.7511	13.0799	P13639	TH214Y
P06733_280	10.7482	NA	P06733	TH214Y
P00568_164	10.6992	1.44498	P00568	TH214Y
P0DMV8_611	10.6901	13.1661	P0DMV8	TH214Y
P55072_755	10.666	5.1597	P55072	TH214Y
O00567_284	10.6651	13.2016	O00567	TH214Y
Q9HB71_199	10.6581	5.60047	Q9HB71	TH214Y
O14818_153	10.6477	6.39752	O14818	TH214Y
P40926_253	10.6425	2.44187	P40926	TH214Y
Q04837_73	10.6377	NA	Q04837	TH214Y
O60664_251	10.5927	5.3492	O60664	TH214Y
P62841_115	10.5827	13.3181	P62841	TH214Y
P13639_443	10.5117	3.61742	P13639	TH214Y
P06733_189	10.4939	5.24715	P06733	TH214Y
P24752_214	10.4878	13.4523	P24752	TH214Y
Q00839_525	10.4739	NA	Q00839	TH214Y
P50991_179	10.46	13.4916	P50991	TH214Y
P23743_623	10.4314	9.20545	P23743	TH214Y
O15371_50	10.4185	11.8396	O15371	TH214Y
Q00839_825	10.3831	NA	Q00839	TH214Y
P13797_302	10.3806	13.6038	P13797	TH214Y
Q9Y2B0_92	10.3604	0.309504	Q9Y2B0	TH214Y
P15880_266	10.3504	3.22414	P15880	TH214Y
P61081_86	10.3169	NA	P61081	TH214Y
P50454_135	10.2967	1.08431	P50454	TH214Y
O14737_80	10.2271	13.8209	O14737	TH214Y
P06737_204	10.2185	13.8331	P06737	TH214Y
P27708_1322	10.186	13.8791	P27708	TH214Y
P52597_210	10.1781	1.43382	P52597	TH214Y
Q9BQP7_205	10.1749	8.60767	Q9BQP7	TH214Y
P09601_134	10.1324	0.254197	P09601	TH214Y
Q13509_51	10.1293	13.9592	Q13509	TH214Y
P60900_107	10.1022	NA	P60900	TH214Y
P68363_161	10.0966	3.64025	P68363	TH214Y
Q13547_221	10.094	14.0092	Q13547	TH214Y
P13797_465	10.0816	4.08469	P13797	TH214Y
O94925_308	10.0787	5.83623	O94925	TH214Y
P07237_414	10.0647	1.39773	P07237	TH214Y
Q13547_201	10.025	14.1068	Q13547	TH214Y
Q9Y3F4_114	10.025	14.1068	Q9Y3F4	TH214Y
Q9Y285_310	10.0055	0.889308	Q9Y285	TH214Y
P12277_100	9.99104	7.84414	P12277	TH214Y
P07900_438	9.94059	1.36666	P07900	TH214Y
Q16576_20	9.9383	NA	Q16576	TH214Y
O15260_24	9.9341	NA	O15260	TH214Y
O43252_30	9.88715	5.65409	O43252	TH214Y
P62269_40	9.8868	6.37494	P62269	TH214Y
P49368_247	9.83451	9.32318	P49368	TH214Y
Q5VTE0_85	9.79034	4.31162	Q5VTE0	TH214Y
P22102_662	9.7825	11.6707	P22102	TH214Y
Q99986_204	9.77863	NA	Q99986	TH214Y
P22314_471	9.71134	NA	P22314	TH214Y
Q08211_902	9.70398	4.05661	Q08211	TH214Y
P38646_181	9.62684	2.81068	P38646	TH214Y
P51570_236	9.60998	NA	P51570	TH214Y
P09651_341	9.58921	6.11305	P09651	TH214Y
P04406_255	9.58421	6.10837	P04406	TH214Y
P07237_99	9.57137	1.64921	P07237	TH214Y
Q9BVA1_51	9.47898	9.19745	Q9BVA1	TH214Y
P13804_235	9.45532	2.40289	P13804	TH214Y
P46779_40	9.4411	2.12615	P46779	TH214Y
Q9NTJ3_197	9.30322	1.74001	Q9NTJ3	TH214Y
P09651_62	9.22701	7.83715	P09651	TH214Y
P60900_103	9.22204	NA	P60900	TH214Y
P62829_38	9.18138	8.25348	P62829	TH214Y
P61247_205	9.10496	4.12275	P61247	TH214Y
Q9BVA1_36	9.075	9.78291	Q9BVA1	TH214Y
P60709_294	9.07227	NA	P60709	TH214Y
P62826_147	9.06165	6.45082	P62826	TH214Y
P04181_133	8.9818	0.257241	P04181	TH214Y
P31948_354	8.9462	5.07162	P31948	TH214Y
O14979_167	8.9023	NA	O14979	TH214Y
P29401_275	8.86995	NA	P29401	TH214Y
P09651_347	8.83291	6.07686	P09651	TH214Y
P52272_64	8.76275	3.05553	P52272	TH214Y
P62910_95	8.73984	0	P62910	TH214Y
P49411_246	8.73904	0.189826	P49411	TH214Y
Q9Y277_67	8.67826	9.75336	Q9Y277	TH214Y
Q16576_131	8.62436	2.64879	Q16576	TH214Y
P11142_525	8.60128	0.890853	P11142	TH214Y
P06733_236	8.59762	6.28576	P06733	TH214Y
P28072_95	8.58362	NA	P28072	TH214Y
P13639_397	8.53513	4.47632	P13639	TH214Y
Q15437_707	8.47042	NA	Q15437	TH214Y
Q9BVA1_310	8.45645	2.19281	Q9BVA1	TH214Y
P83731_11	8.41866	5.04004	P83731	TH214Y
P62269_77	8.36448	0.604449	P62269	TH214Y
P31153_371	8.3492	3.48045	P31153	TH214Y
P06493_270	8.30968	9.5054	P06493	TH214Y
P07195_240	8.3001	3.44701	P07195	TH214Y
P07900_493	8.23159	9.77718	P07900	TH214Y
P62701_54	8.16275	0.852744	P62701	TH214Y
P78371_408	8.14531	6.53835	P78371	TH214Y
P23743_169	8.09182	NA	P23743	TH214Y
P04406_140	7.96564	NA	P04406	TH214Y
Q96F86_475	7.95329	0	Q96F86	TH214Y
P27348_128	7.91713	4.69954	P27348	TH214Y
P41091_330	7.86681	0	P41091	TH214Y
P41252_94	7.83461	3.19079	P41252	TH214Y
P34932_435	7.77848	6.03665	P34932	TH214Y
P13639_373	7.71058	0.731136	P13639	TH214Y
Q5VTE0_254	7.65719	4.54958	Q5VTE0	TH214Y
P08559_243	7.61611	4.90155	P08559	TH214Y
P23743_399	7.60254	8.21078	P23743	TH214Y
P31689_33	7.45456	2.18109	P31689	TH214Y
Q16576_153	7.41981	2.84879	Q16576	TH214Y
P49368_232	7.3591	9.6905	P49368	TH214Y
P36578_277	7.3432	7.31337	P36578	TH214Y
Q9H773_129	7.21765	8.32606	Q9H773	TH214Y
O14773_508	7.15722	0.898592	O14773	TH214Y
Q9BYT8_245	7.10267	2.03854	Q9BYT8	TH214Y
O14929_14	7.08368	5.07669	O14929	TH214Y
P62258_214	7.00755	0	P62258	TH214Y
P68363_282	6.95882	NA	P68363	TH214Y
P63279_68	6.91595	NA	P63279	TH214Y
P60709_166	6.81235	6.90306	P60709	TH214Y
P62854_73	6.65527	5.94845	P62854	TH214Y
Q00839_820	6.61551	2.63744	Q00839	TH214Y
P12268_430	6.6086	9.45922	P12268	TH214Y
P62258_20	6.60449	8.47445	P62258	TH214Y
Q13838_39	6.58282	4.25884	Q13838	TH214Y
P46782_48	6.5695	9.57873	P46782	TH214Y
P13639_634	6.55611	NA	P13639	TH214Y
P40925_192	6.50544	9.13789	P40925	TH214Y
O60502_805	6.50143	1.73679	O60502	TH214Y
P0DMV8_107	6.46626	0.979324	P0DMV8	TH214Y
P26599_430	6.4581	3.93654	P26599	TH214Y
Q13838_266	6.44701	5.76131	Q13838	TH214Y
P50570_265	6.42311	NA	P50570	TH214Y
P48643_274	6.36426	6.99016	P48643	TH214Y
P68363_357	6.36245	6.51399	P68363	TH214Y
P40926_80	6.35703	NA	P40926	TH214Y
P62277_89	6.3011	6.70884	P62277	TH214Y
P07737_60	6.15861	7.37708	P07737	TH214Y
P25705_343	6.15534	3.24136	P25705	TH214Y
P23743_477	6.11912	7.60202	P23743	TH214Y
P80303_169	6.11452	NA	P80303	TH214Y
P62081_177	6.11074	7.05385	P62081	TH214Y
O75390_345	6.09534	9.56032	O75390	TH214Y
P68371_36	6.08712	2.58907	P68371	TH214Y
P62826_39	6.04468	1.31238	P62826	TH214Y
O75390_185	6.01013	5.32813	O75390	TH214Y
P00918_51	6.0062	0	P00918	TH214Y
P33991_471	5.9502	NA	P33991	TH214Y
P07237_327	5.92562	5.10558	P07237	TH214Y
P11940_291	5.92416	1.58284	P11940	TH214Y
P08238_276	5.89224	NA	P08238	TH214Y
P55795_276	5.88897	NA	P55795	TH214Y
P30086_120	5.79203	2.03269	P30086	TH214Y
Q09028_154	5.78052	NA	Q09028	TH214Y
P23743_669	5.77211	0	P23743	TH214Y
P23526_39	5.76672	2.87757	P23526	TH214Y
P30101_95	5.76484	NA	P30101	TH214Y
P35579_650	5.69484	5.96285	P35579	TH214Y
P05141_95	5.68504	NA	P05141	TH214Y
P60842_70	5.67937	0.967306	P60842	TH214Y
P15121_190	5.64439	2.15162	P15121	TH214Y
P14625_727	5.56493	1.8643	P14625	TH214Y
P50990_468	5.55497	2.96377	P50990	TH214Y
Q9Y2Z0_90	5.5314	NA	Q9Y2Z0	TH214Y
Q6UXN9_71	5.50816	NA	Q6UXN9	TH214Y
P58876_84	5.48801	4.10702	P58876	TH214Y
P47813_106	5.48586	NA	P47813	TH214Y
P30101_67	5.47702	NA	P30101	TH214Y
P63104_128	5.43263	7.49655	P63104	TH214Y
P61313_81	5.41864	2.06089	P61313	TH214Y
P40429_149	5.39882	2.47244	P40429	TH214Y
Q86VP6_398	5.31127	6.07891	Q86VP6	TH214Y
P34897_100	5.26137	0.526744	P34897	TH214Y
P61353_75	5.24062	5.15531	P61353	TH214Y
Q14204_2892	5.23168	NA	Q14204	TH214Y
Q07666_435	5.21556	NA	Q07666	TH214Y
P30519_154	5.19185	2.41026	P30519	TH214Y
Q6PI48_237	5.17515	NA	Q6PI48	TH214Y
P46782_45	5.16223	8.59827	P46782	TH214Y
P62826_155	5.14619	1.7247	P62826	TH214Y
Q8N8N7_259	5.13565	5.6894	Q8N8N7	TH214Y
P45880_236	5.07998	0.562422	P45880	TH214Y
P49327_1253	5.05424	1.27073	P49327	TH214Y
Q14203_1149	5.04713	NA	Q14203	TH214Y
P10768_191	5.01802	4.9111	P10768	TH214Y
P31948_451	5.00872	0.882434	P31948	TH214Y
P09211_50	5.00606	2.23799	P09211	TH214Y
P63241_69	4.98659	3.39145	P63241	TH214Y
P54886_782	4.81984	5.29693	P54886	TH214Y
P04350_50	4.80514	2.15562	P04350	TH214Y
P08238_484	4.79578	3.21179	P08238	TH214Y
P14625_678	4.78056	NA	P14625	TH214Y
Q13838_265	4.75857	NA	Q13838	TH214Y
Q8NCW5_136	4.74246	NA	Q8NCW5	TH214Y
Q8WUM4_258	4.68831	2.84279	Q8WUM4	TH214Y
P60709_218	4.68689	3.71776	P60709	TH214Y
P07437_340	4.67692	NA	P07437	TH214Y
P55209_110	4.62281	6.87097	P55209	TH214Y
P61158_16	4.57274	NA	P61158	TH214Y
P46776_48	4.5517	NA	P46776	TH214Y
Q99832_232	4.55011	2.55414	Q99832	TH214Y
P60842_50	4.53291	8.42771	P60842	TH214Y
Q99961_57	4.51758	3.16244	Q99961	TH214Y
Q6UWP2_166	4.50857	NA	Q6UWP2	TH214Y
P50502_151	4.48265	2.77216	P50502	TH214Y
P62277_18	4.44885	7.73538	P62277	TH214Y
P08670_61	4.43588	NA	P08670	TH214Y
P08865_39	4.43377	NA	P08865	TH214Y
P46777_210	4.42342	3.93255	P46777	TH214Y
P04406_42	4.42149	NA	P04406	TH214Y
P60174_246	4.3949	4.62143	P60174	TH214Y
Q8N163_100	4.39474	NA	Q8N163	TH214Y
P08243_140	4.39472	6.96237	P08243	TH214Y
P40227_109	4.38622	9.98831	P40227	TH214Y
P60709_240	4.37853	8.83845	P60709	TH214Y
Q00839_266	4.36666	7.25455	Q00839	TH214Y
P31153_377	4.36533	4.41955	P31153	TH214Y
P31948_323	4.36431	NA	P31948	TH214Y
P49321_91	4.30561	NA	P49321	TH214Y
P46379_793	4.30507	5.19106	P46379	TH214Y
P29401_447	4.28231	4.93757	P29401	TH214Y
P31948_75	4.27953	1.5113	P31948	TH214Y
P04406_49	4.26728	NA	P04406	TH214Y
P60174_85	4.26349	NA	P60174	TH214Y
P43034_394	4.24466	NA	P43034	TH214Y
P36542_77	4.22685	4.31752	P36542	TH214Y
P43243_508	4.17765	5.32898	P43243	TH214Y
P24534_18	4.16866	0.749468	P24534	TH214Y
P62277_38	4.14969	2.85526	P62277	TH214Y
P08238_216	4.08247	5.26114	P08238	TH214Y
P51970_32	4.07221	2.7947	P51970	TH214Y
O75390_217	4.01699	NA	O75390	TH214Y
P0DMV8_15	4.01602	1.71149	P0DMV8	TH214Y
P31948_236	4.0135	1.46204	P31948	TH214Y
P35579_573	4.00035	NA	P35579	TH214Y
P49327_470	3.97782	2.02159	P49327	TH214Y
Q9Y262_247	3.977	NA	Q9Y262	TH214Y
P38646_196	3.95142	5.22507	P38646	TH214Y
P61088_76	3.92801	NA	P61088	TH214Y
P25705_337	3.92561	2.6822	P25705	TH214Y
O75533_1288	3.90403	5.1899	O75533	TH214Y
P53611_30	3.86673	2.4126	P53611	TH214Y
P09874_829	3.83863	2.08354	P09874	TH214Y
P42704_317	3.83205	3.51191	P42704	TH214Y
P30084_264	3.82265	5.07983	P30084	TH214Y
O43684_194	3.81528	2.58842	O43684	TH214Y
Q02543_28	3.79919	4.26149	Q02543	TH214Y
P50990_436	3.78979	1.16746	P50990	TH214Y
P49588_667	3.78822	1.49074	P49588	TH214Y
P62280_55	3.77971	10.5715	P62280	TH214Y
Q14157_858	3.76913	2.21904	Q14157	TH214Y
Q13126_221	3.74489	NA	Q13126	TH214Y
P18669_119	3.74168	1.88179	P18669	TH214Y
P34932_148	3.69634	3.0832	P34932	TH214Y
P14618_370	3.68182	0.143903	P14618	TH214Y
Q05048_170	3.65532	2.65433	Q05048	TH214Y
P63244_228	3.64174	NA	P63244	TH214Y
O60506_205	3.62484	4.05524	O60506	TH214Y
Q14974_321	3.61414	9.74667	Q14974	TH214Y
P49411_92	3.49024	0.234857	P49411	TH214Y
P09429_144	3.48822	NA	P09429	TH214Y
P08243_204	3.46197	9.57874	P08243	TH214Y
P83731_14	3.429	10.2088	P83731	TH214Y
Q02790_57	3.39833	NA	Q02790	TH214Y
P12268_459	3.37279	5.20764	P12268	TH214Y
P62826_146	3.3717	4.07896	P62826	TH214Y
O43172_470	3.36261	NA	O43172	TH214Y
Q16181_306	3.35794	4.50395	Q16181	TH214Y
O43684_141	3.35405	10.2639	O43684	TH214Y
Q9Y383_196	3.34071	0.576705	Q9Y383	TH214Y
Q13885_50	3.32738	10.3976	Q13885	TH214Y
P08238_426	3.29288	NA	P08238	TH214Y
P49327_277	3.28469	0	P49327	TH214Y
P11586_371	3.2517	NA	P11586	TH214Y
P33993_6	3.23851	NA	P33993	TH214Y
Q9BWF3_37	3.2375	1.72035	Q9BWF3	TH214Y
P46783_82	3.23683	0.470902	P46783	TH214Y
P11586_723	3.21277	0.663882	P11586	TH214Y
P42025_92	3.15708	NA	P42025	TH214Y
P31939_220	3.12382	0	P31939	TH214Y
P43490_188	3.06247	6.18817	P43490	TH214Y
P21796_67	3.05446	0.191596	P21796	TH214Y
P46782_38	3.03136	NA	P46782	TH214Y
O00154_194	3.03078	3.36785	O00154	TH214Y
P42704_1328	3.01249	3.68272	P42704	TH214Y
P20618_135	2.9953	NA	P20618	TH214Y
P49721_134	2.95188	NA	P49721	TH214Y
P07900_528	2.93791	2.20027	P07900	TH214Y
P14625_527	2.92569	3.07674	P14625	TH214Y
Q8N8N7_265	2.90762	1.35721	Q8N8N7	TH214Y
Q9BXJ9_86	2.89217	1.82985	Q9BXJ9	TH214Y
O43684_207	2.86758	NA	O43684	TH214Y
P42025_33	2.83097	1.99006	P42025	TH214Y
P61163_33	2.83097	1.99006	P61163	TH214Y
P14868_402	2.81133	NA	P14868	TH214Y
O94760_161	2.7545	NA	O94760	TH214Y
P31948_376	2.75347	2.44256	P31948	TH214Y
Q16778_122	2.66053	NA	Q16778	TH214Y
Q02790_220	2.64166	0.813918	Q02790	TH214Y
P26599_127	2.62798	4.52634	P26599	TH214Y
P31943_195	2.58554	1.05332	P31943	TH214Y
P08243_398	2.58417	NA	P08243	TH214Y
O43837_366	2.57484	NA	O43837	TH214Y
P49411_115	2.55371	0.33606	P49411	TH214Y
P06280_123	2.50748	0.034563	P06280	TH214Y
P14625_677	2.49354	NA	P14625	TH214Y
P63104_211	2.47496	NA	P63104	TH214Y
P23743_148	2.4593	2.70145	P23743	TH214Y
Q12931_106	2.44502	1.90508	Q12931	TH214Y
P61088_62	2.43678	0.247761	P61088	TH214Y
P30837_148	2.43668	NA	P30837	TH214Y
P60174_105	2.43238	NA	P60174	TH214Y
Q14204_2881	2.42721	1.91185	Q14204	TH214Y
Q00610_1237	2.42225	NA	Q00610	TH214Y
Q13547_226	2.4188	NA	Q13547	TH214Y
Q09028_181	2.40449	10.398	Q09028	TH214Y
P0DMV8_137	2.40262	NA	P0DMV8	TH214Y
P39019_48	2.37587	0.0657068	P39019	TH214Y
P08238_305	2.31832	1.83143	P08238	TH214Y
P40925_210	2.30028	NA	P40925	TH214Y
Q9Y697_228	2.27365	0.0404236	Q9Y697	TH214Y
P31948_310	2.26391	1.74244	P31948	TH214Y
Q99436_232	2.25347	NA	Q99436	TH214Y
P55786_295	2.21428	NA	P55786	TH214Y
P11142_115	2.18746	0.380603	P11142	TH214Y
Q9Y371_80	2.13745	0.457577	Q9Y371	TH214Y
P11586_258	2.1198	0.747605	P11586	TH214Y
P24752_188	2.07881	NA	P24752	TH214Y
Q9BVA1_50	2.06346	1.18907	Q9BVA1	TH214Y
P50995_398	2.05029	0.737872	P50995	TH214Y
P63167_50	2.03723	0.431916	P63167	TH214Y
Q96FJ2_50	2.03723	0.431916	Q96FJ2	TH214Y
Q9BV86_103	1.97187	NA	Q9BV86	TH214Y
Q99536_100	1.93496	NA	Q99536	TH214Y
Q16576_180	1.92556	NA	Q16576	TH214Y
P62750_144	1.83404	0.51378	P62750	TH214Y
O60506_373	1.81799	NA	O60506	TH214Y
P11310_397	1.79852	0.32895	P11310	TH214Y
P11908_94	1.77868	0.81854	P11908	TH214Y
Q99832_222	1.77809	0.153105	Q99832	TH214Y
P31948_316	1.75313	1.33701	P31948	TH214Y
P62258_122	1.74389	1.41266	P62258	TH214Y
P78527_1988	1.70499	NA	P78527	TH214Y
Q9NQC3_1165	1.65678	10.3478	Q9NQC3	TH214Y
P25786_24	1.64227	NA	P25786	TH214Y
P11021_160	1.64099	4.75909	P11021	TH214Y
P78527_3475	1.5737	0.792658	P78527	TH214Y
P62241_188	1.56759	0.517128	P62241	TH214Y
P14866_267	1.56622	0.769523	P14866	TH214Y
P38646_118	1.52743	NA	P38646	TH214Y
Q14247_162	1.52652	0.292734	Q14247	TH214Y
Q9Y617_101	1.51231	NA	Q9Y617	TH214Y
P07237_196	1.5012	0.615813	P07237	TH214Y
P31939_303	1.48164	0.245982	P31939	TH214Y
P62333_207	1.47833	1.86895	P62333	TH214Y
P52597_82	1.47241	0.922719	P52597	TH214Y
P39019_79	1.4542	NA	P39019	TH214Y
P13797_601	1.44783	0.117076	P13797	TH214Y
P55327_136	1.43809	0.967272	P55327	TH214Y
Q9Y3B4_117	1.41917	0.951965	Q9Y3B4	TH214Y
P09622_153	1.37175	1.53508	P09622	TH214Y
Q9BTT0_92	1.36504	NA	Q9BTT0	TH214Y
Q96AE4_242	1.36211	NA	Q96AE4	TH214Y
P62241_117	1.30572	0.479919	P62241	TH214Y
Q15181_193	1.30039	NA	Q15181	TH214Y
P09429_162	1.29334	NA	P09429	TH214Y
P78527_3168	1.25798	0.412087	P78527	TH214Y
Q15428_69	1.24863	NA	Q15428	TH214Y
Q9NQG5_117	1.24166	NA	Q9NQG5	TH214Y
Q08211_1155	1.22393	0.34487	Q08211	TH214Y
Q13526_23	1.21196	NA	Q13526	TH214Y
Q15233_267	1.2031	NA	Q15233	TH214Y
O14744_324	1.19605	NA	O14744	TH214Y
P08708_20	1.17306	0.283413	P08708	TH214Y
Q16576_60	1.15884	1.46511	Q16576	TH214Y
O60664_95	1.14595	1.82987	O60664	TH214Y
P68371_50	1.07601	0.421683	P68371	TH214Y
P11310_183	1.05384	0.8954	P11310	TH214Y
P11177_63	1.05313	0.156515	P11177	TH214Y
Q9Y3F4_127	1.05067	0.656746	Q9Y3F4	TH214Y
P62979_140	0.998293	NA	P62979	TH214Y
Q9H7S9_545	0.981317	0.279423	Q9H7S9	TH214Y
P08243_216	0.963989	0.114628	P08243	TH214Y
P50914_14	0.961545	0.299422	P50914	TH214Y
Q9Y3F4_300	0.945308	NA	Q9Y3F4	TH214Y
P23919_151	0.931817	NA	P23919	TH214Y
P04406_94	0.919409	NA	P04406	TH214Y
P17987_299	0.918137	0.105954	P17987	TH214Y
P22314_60	0.87399	0.390035	P22314	TH214Y
P46777_253	0.872797	0.595124	P46777	TH214Y
P13639_787	0.866343	0.104281	P13639	TH214Y
P31946_130	0.840762	0.789276	P31946	TH214Y
Q92616_2611	0.823191	0.91912	Q92616	TH214Y
P31153_188	0.798462	NA	P31153	TH214Y
P51991_188	0.706555	0.0936082	P51991	TH214Y
P14868_253	0.63179	0.36809	P14868	TH214Y
Q92616_1391	0.60762	NA	Q92616	TH214Y
P53396_531	0.587752	NA	P53396	TH214Y
P49720_104	0.573837	NA	P49720	TH214Y
P00505_96	0.544283	1.32937	P00505	TH214Y
P84090_82	0.541225	0.537381	P84090	TH214Y
P28074_228	0.487496	3.24937	P28074	TH214Y
Q9NSE4_240	0.476208	NA	Q9NSE4	TH214Y
P30405_90	0.391688	NA	P30405	TH214Y
P04792_54	0.384534	NA	P04792	TH214Y
P21127_681	0.343017	NA	P21127	TH214Y
Q9NRH3_366	0.33752	NA	Q9NRH3	TH214Y
P23743_335	0.329653	NA	P23743	TH214Y
O00244_31	0.215659	NA	O00244	TH214Y
P31930_219	0.213266	NA	P31930	TH214Y
P62269_95	0.210206	3.08206	P62269	TH214Y
O00429_273	0.181479	0.0288596	O00429	TH214Y

## Sheet: TH216_Y_sol_hDGKA_HEK
site	Ratio	Std	uni	treatment
O00148_138	20	7.82168	O00148	TH216Y
O00154_194	20	0	O00154	TH216Y
O00299_117	20	NA	O00299	TH216Y
O00567_321	20	NA	O00567	TH216Y
O00571_243	20	NA	O00571	TH216Y
O14654_656	20	7.98996	O14654	TH216Y
O14744_389	20	NA	O14744	TH216Y
O14744_502	20	0	O14744	TH216Y
O14818_110	20	7.15961	O14818	TH216Y
O14929_14	20	3.08552	O14929	TH216Y
O14929_363	20	0.356991	O14929	TH216Y
O15173_143	20	11.1862	O15173	TH216Y
O15355_160	20	0	O15355	TH216Y
O43172_167	20	NA	O43172	TH216Y
O43172_236	20	NA	O43172	TH216Y
O43390_435	20	0	O43390	TH216Y
O43390_436	20	0	O43390	TH216Y
O43615_242	20	0	O43615	TH216Y
O43660_445	20	NA	O43660	TH216Y
O43684_169	20	11.0904	O43684	TH216Y
O43759_18	20	0	O43759	TH216Y
O43809_24	20	0	O43809	TH216Y
O43852_106	20	0	O43852	TH216Y
O43929_365	20	0	O43929	TH216Y
O60502_720	20	8.20329	O60502	TH216Y
O60502_805	20	11.0943	O60502	TH216Y
O60506_205	20	2.90173	O60506	TH216Y
O60506_373	20	NA	O60506	TH216Y
O60610_773	20	0	O60610	TH216Y
O60664_95	20	7.50869	O60664	TH216Y
O60814_38	20	NA	O60814	TH216Y
O60814_43	20	0	O60814	TH216Y
O60814_84	20	1.05031	O60814	TH216Y
O75369_2502	20	0	O75369	TH216Y
O75369_596	20	2.21593	O75369	TH216Y
O75390_381	20	0	O75390	TH216Y
O75521_169	20	0.270627	O75521	TH216Y
O75915_182	20	6.48941	O75915	TH216Y
O94760_209	20	0	O94760	TH216Y
O94925_293	20	9.38231	O94925	TH216Y
O94925_308	20	0.248259	O94925	TH216Y
O94925_357	20	NA	O94925	TH216Y
O94967_280	20	NA	O94967	TH216Y
O95166_25	20	0	O95166	TH216Y
O95197_1004	20	2.63777	O95197	TH216Y
O95372_205	20	NA	O95372	TH216Y
O96019_186	20	NA	O96019	TH216Y
P00338_172	20	5.33608	P00338	TH216Y
P00338_239	20	0	P00338	TH216Y
P00338_83	20	0	P00338	TH216Y
P00492_105	20	0	P00492	TH216Y
P00505_179	20	0	P00505	TH216Y
P00505_401	20	NA	P00505	TH216Y
P00505_67	20	10.0365	P00505	TH216Y
P00505_96	20	0	P00505	TH216Y
P00966_113	20	NA	P00966	TH216Y
P00966_151	20	NA	P00966	TH216Y
P04075_138	20	0.416236	P04075	TH216Y
P04080_97	20	1.07571	P04080	TH216Y
P04181_133	20	0	P04181	TH216Y
P04181_280	20	0	P04181	TH216Y
P04181_85	20	0	P04181	TH216Y
P04350_106	20	0	P04350	TH216Y
P04350_50	20	0	P04350	TH216Y
P04350_59	20	5.29039	P04350	TH216Y
P04406_45	20	NA	P04406	TH216Y
P04406_49	20	0	P04406	TH216Y
P04632_87	20	6.82123	P04632	TH216Y
P04792_23	20	0	P04792	TH216Y
P05091_170	20	11.4502	P05091	TH216Y
P05091_373	20	0	P05091	TH216Y
P05091_497	20	0	P05091	TH216Y
P05141_81	20	NA	P05141	TH216Y
P06576_196	20	9.30681	P06576	TH216Y
P06576_230	20	9.36364	P06576	TH216Y
P06576_331	20	0	P06576	TH216Y
P06576_395	20	0	P06576	TH216Y
P06576_418	20	0	P06576	TH216Y
P06576_431	20	4.74197	P06576	TH216Y
P06733_200	20	0	P06733	TH216Y
P06733_236	20	5.7125	P06733	TH216Y
P06733_270	20	0	P06733	TH216Y
P06733_287	20	NA	P06733	TH216Y
P06733_407	20	4.25768	P06733	TH216Y
P06744_351	20	0	P06744	TH216Y
P06744_92	20	0	P06744	TH216Y
P07437_106	20	NA	P07437	TH216Y
P07437_159	20	NA	P07437	TH216Y
P07437_208	20	NA	P07437	TH216Y
P07437_310	20	NA	P07437	TH216Y
P07437_36	20	9.90129	P07437	TH216Y
P07437_50	20	4.8537	P07437	TH216Y
P07602_113	20	0	P07602	TH216Y
P07602_418	20	0	P07602	TH216Y
P07602_447	20	0	P07602	TH216Y
P07814_1127	20	0	P07814	TH216Y
P07814_1130	20	0	P07814	TH216Y
P07814_357	20	NA	P07814	TH216Y
P07900_309	20	0	P07900	TH216Y
P07900_313	20	0	P07900	TH216Y
P08237_385	20	0	P08237	TH216Y
P08238_301	20	0	P08238	TH216Y
P08238_430	20	0	P08238	TH216Y
P08238_457	20	0	P08238	TH216Y
P08238_472	20	4.76206	P08238	TH216Y
P08238_512	20	NA	P08238	TH216Y
P08238_596	20	9.78746	P08238	TH216Y
P08243_140	20	4.44584	P08243	TH216Y
P08243_536	20	1.15011	P08243	TH216Y
P08243_67	20	NA	P08243	TH216Y
P08559_227	20	0	P08559	TH216Y
P08670_400	20	10.213	P08670	TH216Y
P08758_308	20	0	P08758	TH216Y
P09211_64	20	8.90845	P09211	TH216Y
P09601_134	20	3.58553	P09601	TH216Y
P09622_153	20	NA	P09622	TH216Y
P09651_167	20	0	P09651	TH216Y
P09651_341	20	0.247745	P09651	TH216Y
P09651_347	20	6.29956	P09651	TH216Y
P09651_357	20	0	P09651	TH216Y
P09651_366	20	0	P09651	TH216Y
P09874_310	20	NA	P09874	TH216Y
P0DMV8_115	20	6.708	P0DMV8	TH216Y
P0DMV8_183	20	11.0055	P0DMV8	TH216Y
P10809_385	20	5.9698	P10809	TH216Y
P10809_503	20	NA	P10809	TH216Y
P10809_90	20	4.01062	P10809	TH216Y
P11021_65	20	NA	P11021	TH216Y
P11142_107	20	10.4819	P11142	TH216Y
P11142_149	20	NA	P11142	TH216Y
P11142_183	20	2.05133	P11142	TH216Y
P11177_131	20	8.81754	P11177	TH216Y
P11177_132	20	11.071	P11177	TH216Y
P11586_348	20	9.18606	P11586	TH216Y
P11586_371	20	0	P11586	TH216Y
P11586_723	20	0	P11586	TH216Y
P11586_852	20	0	P11586	TH216Y
P11940_364	20	0	P11940	TH216Y
P12270_422	20	NA	P12270	TH216Y
P12277_100	20	5.77638	P12277	TH216Y
P12277_39	20	0	P12277	TH216Y
P13639_367	20	1.94867	P13639	TH216Y
P13797_302	20	0	P13797	TH216Y
P13804_105	20	0	P13804	TH216Y
P14174_76	20	0	P14174	TH216Y
P14314_465	20	0	P14314	TH216Y
P14618_161	20	0	P14618	TH216Y
P14618_175	20	4.80474	P14618	TH216Y
P14625_480	20	0	P14625	TH216Y
P14625_652	20	8.95005	P14625	TH216Y
P14625_94	20	0	P14625	TH216Y
P14735_302	20	0	P14735	TH216Y
P15880_248	20	6.62741	P15880	TH216Y
P16615_990	20	NA	P16615	TH216Y
P17812_473	20	0	P17812	TH216Y
P17812_554	20	4.3013	P17812	TH216Y
P17812_94	20	0	P17812	TH216Y
P17812_96	20	2.11575	P17812	TH216Y
P17858_633	20	NA	P17858	TH216Y
P17858_674	20	0	P17858	TH216Y
P17987_545	20	0	P17987	TH216Y
P18077_14	20	0	P18077	TH216Y
P18583_942	20	NA	P18583	TH216Y
P18621_47	20	7.0734	P18621	TH216Y
P18621_63	20	0	P18621	TH216Y
P19525_404	20	NA	P19525	TH216Y
P21796_225	20	0	P21796	TH216Y
P22087_134	20	0	P22087	TH216Y
P22087_313	20	0	P22087	TH216Y
P22314_55	20	0	P22314	TH216Y
P22314_873	20	9.62771	P22314	TH216Y
P22626_174	20	0	P22626	TH216Y
P22626_234	20	0	P22626	TH216Y
P22626_336	20	NA	P22626	TH216Y
P23396_167	20	0	P23396	TH216Y
P23528_82	20	5.677	P23528	TH216Y
P23743_148	20	0	P23743	TH216Y
P23743_169	20	4.70032	P23743	TH216Y
P23743_240	20	NA	P23743	TH216Y
P23743_669	20	7.74442	P23743	TH216Y
P23919_56	20	3.43934	P23919	TH216Y
P23921_232	20	0	P23921	TH216Y
P23921_261	20	NA	P23921	TH216Y
P23921_279	20	0	P23921	TH216Y
P23921_285	20	0	P23921	TH216Y
P23921_737	20	5.62129	P23921	TH216Y
P23921_738	20	10.9939	P23921	TH216Y
P24534_182	20	0	P24534	TH216Y
P25205_188	20	NA	P25205	TH216Y
P25398_114	20	0	P25398	TH216Y
P25398_127	20	6.58377	P25398	TH216Y
P25398_61	20	NA	P25398	TH216Y
P25787_97	20	NA	P25787	TH216Y
P26640_601	20	0.185846	P26640	TH216Y
P26641_145	20	7.53612	P26641	TH216Y
P26641_416	20	0	P26641	TH216Y
P27708_459	20	6.91476	P27708	TH216Y
P27797_109	20	0	P27797	TH216Y
P29401_202	20	NA	P29401	TH216Y
P29401_563	20	NA	P29401	TH216Y
P29401_58	20	0	P29401	TH216Y
P29692_18	20	0	P29692	TH216Y
P30048_172	20	NA	P30048	TH216Y
P30084_112	20	0	P30084	TH216Y
P30101_479	20	NA	P30101	TH216Y
P30837_332	20	NA	P30837	TH216Y
P30837_373	20	0	P30837	TH216Y
P30876_1135	20	7.10698	P30876	TH216Y
P30876_814	20	1.70502	P30876	TH216Y
P31153_235	20	0	P31153	TH216Y
P31153_271	20	8.87399	P31153	TH216Y
P31153_371	20	5.21614	P31153	TH216Y
P31689_381	20	NA	P31689	TH216Y
P31939_104	20	NA	P31939	TH216Y
P31939_208	20	NA	P31939	TH216Y
P31939_371	20	0	P31939	TH216Y
P31942_296	20	0	P31942	TH216Y
P31943_240	20	0	P31943	TH216Y
P31943_243	20	NA	P31943	TH216Y
P31943_249	20	0	P31943	TH216Y
P31943_253	20	0	P31943	TH216Y
P31943_266	20	0	P31943	TH216Y
P31943_276	20	3.7815	P31943	TH216Y
P31943_306	20	1.76868	P31943	TH216Y
P31943_82	20	0	P31943	TH216Y
P31948_316	20	NA	P31948	TH216Y
P31948_58	20	NA	P31948	TH216Y
P32929_60	20	0	P32929	TH216Y
P33991_522	20	NA	P33991	TH216Y
P33992_248	20	NA	P33992	TH216Y
P33993_333	20	2.39651	P33993	TH216Y
P33993_393	20	4.50603	P33993	TH216Y
P34932_723	20	0	P34932	TH216Y
P35579_400	20	0	P35579	TH216Y
P35606_201	20	NA	P35606	TH216Y
P36542_196	20	0	P36542	TH216Y
P36542_69	20	NA	P36542	TH216Y
P36551_322	20	0.580835	P36551	TH216Y
P36578_52	20	NA	P36578	TH216Y
P36639_48	20	NA	P36639	TH216Y
P38646_161	20	0	P38646	TH216Y
P38646_652	20	7.35039	P38646	TH216Y
P39019_48	20	0	P39019	TH216Y
P40429_137	20	6.75664	P40429	TH216Y
P40429_149	20	0	P40429	TH216Y
P40429_192	20	NA	P40429	TH216Y
P40429_71	20	0	P40429	TH216Y
P40926_56	20	0	P40926	TH216Y
P40939_298	20	NA	P40939	TH216Y
P41250_467	20	0	P41250	TH216Y
P41252_434	20	0	P41252	TH216Y
P41252_626	20	0	P41252	TH216Y
P41567_54	20	0	P41567	TH216Y
P42167_394	20	0	P42167	TH216Y
P42345_771	20	NA	P42345	TH216Y
P42765_182	20	0	P42765	TH216Y
P42766_78	20	0	P42766	TH216Y
P43034_102	20	9.95191	P43034	TH216Y
P43034_394	20	11.4818	P43034	TH216Y
P45880_78	20	NA	P45880	TH216Y
P46379_818	20	5.73102	P46379	TH216Y
P46776_109	20	0	P46776	TH216Y
P46777_219	20	0	P46777	TH216Y
P46777_253	20	NA	P46777	TH216Y
P46778_30	20	0	P46778	TH216Y
P46778_65	20	0	P46778	TH216Y
P46782_188	20	4.73543	P46782	TH216Y
P46782_38	20	9.38787	P46782	TH216Y
P46782_48	20	8.82018	P46782	TH216Y
P46783_127	20	0	P46783	TH216Y
P47813_95	20	NA	P47813	TH216Y
P47914_98	20	0	P47914	TH216Y
P48147_471	20	NA	P48147	TH216Y
P48735_179	20	7.14151	P48735	TH216Y
P49321_540	20	0	P49321	TH216Y
P49321_635	20	0	P49321	TH216Y
P49327_1253	20	9.05705	P49327	TH216Y
P49327_2034	20	0	P49327	TH216Y
P49327_243	20	NA	P49327	TH216Y
P49327_2454	20	6.15667	P49327	TH216Y
P49327_277	20	NA	P49327	TH216Y
P49327_45	20	3.10027	P49327	TH216Y
P49368_232	20	NA	P49368	TH216Y
P49368_247	20	3.54805	P49368	TH216Y
P49368_437	20	0	P49368	TH216Y
P49411_115	20	8.7573	P49411	TH216Y
P49411_122	20	0	P49411	TH216Y
P49411_133	20	0	P49411	TH216Y
P49411_246	20	10.4423	P49411	TH216Y
P49411_266	20	8.52296	P49411	TH216Y
P49411_92	20	1.64981	P49411	TH216Y
P49591_294	20	0	P49591	TH216Y
P49756_256	20	0	P49756	TH216Y
P50213_137	20	0	P50213	TH216Y
P50454_135	20	11.3764	P50454	TH216Y
P50502_151	20	NA	P50502	TH216Y
P50570_726	20	11.1804	P50570	TH216Y
P50990_242	20	NA	P50990	TH216Y
P50990_30	20	0	P50990	TH216Y
P50990_304	20	8.69386	P50990	TH216Y
P50990_426	20	NA	P50990	TH216Y
P50990_436	20	NA	P50990	TH216Y
P50990_47	20	9.69974	P50990	TH216Y
P50991_179	20	2.52469	P50991	TH216Y
P50991_269	20	11.1101	P50991	TH216Y
P50991_282	20	11.4836	P50991	TH216Y
P50991_449	20	5.72631	P50991	TH216Y
P51991_188	20	11.1068	P51991	TH216Y
P52597_210	20	3.07234	P52597	TH216Y
P52597_219	20	0	P52597	TH216Y
P52597_240	20	NA	P52597	TH216Y
P52597_243	20	NA	P52597	TH216Y
P52597_266	20	9.38364	P52597	TH216Y
P52597_276	20	NA	P52597	TH216Y
P52701_850	20	NA	P52701	TH216Y
P52815_152	20	0	P52815	TH216Y
P53396_531	20	0	P53396	TH216Y
P53611_30	20	0	P53611	TH216Y
P53611_44	20	0	P53611	TH216Y
P53621_1156	20	0	P53621	TH216Y
P53621_249	20	NA	P53621	TH216Y
P53621_628	20	4.51038	P53621	TH216Y
P53621_733	20	NA	P53621	TH216Y
P54136_505	20	NA	P54136	TH216Y
P54577_134	20	0	P54577	TH216Y
P54886_782	20	2.06563	P54886	TH216Y
P55060_369	20	0	P55060	TH216Y
P55072_755	20	0	P55072	TH216Y
P55795_240	20	0	P55795	TH216Y
P55795_276	20	0	P55795	TH216Y
P56192_201	20	7.25598	P56192	TH216Y
P58876_38	20	NA	P58876	TH216Y
P58876_43	20	0	P58876	TH216Y
P58876_84	20	1.05031	P58876	TH216Y
P60709_169	20	5.65322	P60709	TH216Y
P60709_362	20	4.52878	P60709	TH216Y
P60842_197	20	10.0758	P60842	TH216Y
P60842_48	20	7.01108	P60842	TH216Y
P60900_103	20	0	P60900	TH216Y
P61011_424	20	0	P61011	TH216Y
P61221_172	20	0	P61221	TH216Y
P61221_411	20	0	P61221	TH216Y
P61247_155	20	NA	P61247	TH216Y
P61247_205	20	4.19036	P61247	TH216Y
P61247_31	20	1.30394	P61247	TH216Y
P61289_196	20	NA	P61289	TH216Y
P61353_77	20	NA	P61353	TH216Y
P61513_18	20	0	P61513	TH216Y
P61758_60	20	0	P61758	TH216Y
P61978_323	20	0.0463156	P61978	TH216Y
P61978_380	20	0	P61978	TH216Y
P61978_449	20	8.65181	P61978	TH216Y
P62136_134	20	0	P62136	TH216Y
P62241_83	20	11.1364	P62241	TH216Y
P62249_115	20	5.51713	P62249	TH216Y
P62258_122	20	NA	P62258	TH216Y
P62258_214	20	0	P62258	TH216Y
P62258_49	20	NA	P62258	TH216Y
P62263_72	20	NA	P62263	TH216Y
P62266_134	20	1.15525	P62266	TH216Y
P62269_40	20	3.78586	P62269	TH216Y
P62277_89	20	8.21204	P62277	TH216Y
P62333_328	20	NA	P62333	TH216Y
P62701_82	20	0	P62701	TH216Y
P62899_103	20	9.37093	P62899	TH216Y
P62899_108	20	0	P62899	TH216Y
P62906_107	20	11.4204	P62906	TH216Y
P62979_105	20	0	P62979	TH216Y
P62979_148	20	0	P62979	TH216Y
P63244_194	20	5.39136	P63244	TH216Y
P63244_228	20	0	P63244	TH216Y
P68104_141	20	NA	P68104	TH216Y
P68104_29	20	0	P68104	TH216Y
P68363_262	20	0	P68363	TH216Y
P68363_272	20	4.15997	P68363	TH216Y
P68371_59	20	0	P68371	TH216Y
P78347_138	20	7.28144	P78347	TH216Y
P78347_503	20	NA	P78347	TH216Y
P78371_299	20	NA	P78371	TH216Y
P78527_115	20	0	P78527	TH216Y
P78527_1411	20	NA	P78527	TH216Y
P78527_2772	20	0	P78527	TH216Y
P78527_2775	20	NA	P78527	TH216Y
P78527_366	20	NA	P78527	TH216Y
P80303_169	20	0	P80303	TH216Y
Q00169_62	20	NA	Q00169	TH216Y
Q00535_242	20	NA	Q00535	TH216Y
Q00610_1451	20	7.32132	Q00610	TH216Y
Q00610_1513	20	NA	Q00610	TH216Y
Q01081_158	20	NA	Q01081	TH216Y
Q01844_278	20	NA	Q01844	TH216Y
Q02790_111	20	7.06226	Q02790	TH216Y
Q02790_225	20	10.3322	Q02790	TH216Y
Q03468_460	20	1.60586	Q03468	TH216Y
Q04726_502	20	NA	Q04726	TH216Y
Q04726_731	20	4.06062	Q04726	TH216Y
Q04727_732	20	4.06062	Q04727	TH216Y
Q04837_119	20	0	Q04837	TH216Y
Q05048_202	20	NA	Q05048	TH216Y
Q05048_67	20	NA	Q05048	TH216Y
Q06210_553	20	NA	Q06210	TH216Y
Q07666_145	20	1.01395	Q07666	TH216Y
Q07666_435	20	0	Q07666	TH216Y
Q08211_902	20	0	Q08211	TH216Y
Q08J23_646	20	NA	Q08J23	TH216Y
Q12931_317	20	9.61862	Q12931	TH216Y
Q13042_461	20	NA	Q13042	TH216Y
Q13057_396	20	0	Q13057	TH216Y
Q13151_55	20	NA	Q13151	TH216Y
Q13310_364	20	0	Q13310	TH216Y
Q13347_241	20	NA	Q13347	TH216Y
Q13509_106	20	0	Q13509	TH216Y
Q13509_310	20	7.90257	Q13509	TH216Y
Q13547_358	20	0	Q13547	TH216Y
Q13547_67	20	0.150039	Q13547	TH216Y
Q13547_72	20	0.52462	Q13547	TH216Y
Q13561_313	20	7.18626	Q13561	TH216Y
Q13765_112	20	0	Q13765	TH216Y
Q13813_2423	20	0	Q13813	TH216Y
Q13885_51	20	2.46309	Q13885	TH216Y
Q14166_452	20	0	Q14166	TH216Y
Q14204_1120	20	NA	Q14204	TH216Y
Q14204_146	20	NA	Q14204	TH216Y
Q14204_2638	20	0	Q14204	TH216Y
Q14204_2765	20	NA	Q14204	TH216Y
Q14247_199	20	0	Q14247	TH216Y
Q14257_97	20	0	Q14257	TH216Y
Q14671_103	20	NA	Q14671	TH216Y
Q14694_503	20	6.98753	Q14694	TH216Y
Q14697_113	20	NA	Q14697	TH216Y
Q14974_321	20	9.46035	Q14974	TH216Y
Q14974_529	20	0	Q14974	TH216Y
Q14980_1903	20	0	Q14980	TH216Y
Q14C86_1207	20	0	Q14C86	TH216Y
Q15019_121	20	NA	Q15019	TH216Y
Q15019_129	20	NA	Q15019	TH216Y
Q15041_183	20	0	Q15041	TH216Y
Q15120_326	20	NA	Q15120	TH216Y
Q15233_265	20	0	Q15233	TH216Y
Q15293_127	20	NA	Q15293	TH216Y
Q15293_290	20	7.24574	Q15293	TH216Y
Q15366_182	20	0	Q15366	TH216Y
Q15555_162	20	0	Q15555	TH216Y
Q15645_318	20	NA	Q15645	TH216Y
Q16181_223	20	NA	Q16181	TH216Y
Q16181_306	20	11.5181	Q16181	TH216Y
Q16181_309	20	0	Q16181	TH216Y
Q16539_182	20	0	Q16539	TH216Y
Q16543_248	20	0	Q16543	TH216Y
Q16644_76	20	8.42999	Q16644	TH216Y
Q16836_264	20	10.4531	Q16836	TH216Y
Q5JRX3_383	20	1.33234	Q5JRX3	TH216Y
Q5JS54_58	20	0	Q5JS54	TH216Y
Q5T8P6_35	20	0	Q5T8P6	TH216Y
Q5VTE0_141	20	NA	Q5VTE0	TH216Y
Q5VTE0_29	20	0	Q5VTE0	TH216Y
Q6PI48_237	20	11.4006	Q6PI48	TH216Y
Q6YN16_130	20	5.98329	Q6YN16	TH216Y
Q6ZRS2_2164	20	NA	Q6ZRS2	TH216Y
Q6ZRS2_853	20	NA	Q6ZRS2	TH216Y
Q709C8_2032	20	NA	Q709C8	TH216Y
Q7L014_328	20	0	Q7L014	TH216Y
Q7L2J0_661	20	NA	Q7L2J0	TH216Y
Q86U70_69	20	NA	Q86U70	TH216Y
Q86VP6_564	20	NA	Q86VP6	TH216Y
Q86VR2_233	20	0	Q86VR2	TH216Y
Q8IUF1_50	20	NA	Q8IUF1	TH216Y
Q8IWS0_301	20	0	Q8IWS0	TH216Y
Q8N0X7_478	20	NA	Q8N0X7	TH216Y
Q8N163_198	20	0	Q8N163	TH216Y
Q8N8N7_259	20	NA	Q8N8N7	TH216Y
Q8NI27_715	20	0	Q8NI27	TH216Y
Q8NI60_408	20	0	Q8NI60	TH216Y
Q8NI60_640	20	0	Q8NI60	TH216Y
Q8WUM4_223	20	NA	Q8WUM4	TH216Y
Q92598_89	20	NA	Q92598	TH216Y
Q92616_1210	20	7.92719	Q92616	TH216Y
Q92616_1399	20	4.89564	Q92616	TH216Y
Q92616_1654	20	11.4615	Q92616	TH216Y
Q92616_2079	20	0	Q92616	TH216Y
Q92616_252	20	0.718581	Q92616	TH216Y
Q92616_2611	20	9.25886	Q92616	TH216Y
Q92665_379	20	0	Q92665	TH216Y
Q92769_359	20	NA	Q92769	TH216Y
Q92945_626	20	0	Q92945	TH216Y
Q92945_682	20	NA	Q92945	TH216Y
Q92947_164	20	0	Q92947	TH216Y
Q92973_51	20	0	Q92973	TH216Y
Q969Z0_281	20	NA	Q969Z0	TH216Y
Q96A49_60	20	0	Q96A49	TH216Y
Q96AE4_618	20	0	Q96AE4	TH216Y
Q96BY7_197	20	NA	Q96BY7	TH216Y
Q96FW1_61	20	3.81052	Q96FW1	TH216Y
Q96FW1_79	20	NA	Q96FW1	TH216Y
Q96P16_61	20	NA	Q96P16	TH216Y
Q96PK6_114	20	NA	Q96PK6	TH216Y
Q96PK6_665	20	2.4379	Q96PK6	TH216Y
Q96T76_992	20	0	Q96T76	TH216Y
Q99497_139	20	0	Q99497	TH216Y
Q99538_217	20	0	Q99538	TH216Y
Q99538_220	20	0	Q99538	TH216Y
Q99614_280	20	0	Q99614	TH216Y
Q99807_61	20	0	Q99807	TH216Y
Q99832_111	20	0	Q99832	TH216Y
Q99880_84	20	1.05031	Q99880	TH216Y
Q99956_252	20	10.8418	Q99956	TH216Y
Q99986_204	20	NA	Q99986	TH216Y
Q99986_311	20	NA	Q99986	TH216Y
Q9BPW8_262	20	0.839706	Q9BPW8	TH216Y
Q9BPW8_83	20	NA	Q9BPW8	TH216Y
Q9BQA1_122	20	NA	Q9BQA1	TH216Y
Q9BQA1_36	20	NA	Q9BQA1	TH216Y
Q9BSD7_37	20	NA	Q9BSD7	TH216Y
Q9BUF5_50	20	10.3021	Q9BUF5	TH216Y
Q9BUF5_59	20	NA	Q9BUF5	TH216Y
Q9BVA1_36	20	10.3024	Q9BVA1	TH216Y
Q9BVA1_51	20	7.18263	Q9BVA1	TH216Y
Q9BWF3_190	20	0	Q9BWF3	TH216Y
Q9BWF3_194	20	0	Q9BWF3	TH216Y
Q9BWJ5_52	20	NA	Q9BWJ5	TH216Y
Q9BXJ9_773	20	0	Q9BXJ9	TH216Y
Q9BYT8_245	20	9.80637	Q9BYT8	TH216Y
Q9C0C9_1251	20	NA	Q9C0C9	TH216Y
Q9H0C8_265	20	NA	Q9H0C8	TH216Y
Q9H147_242	20	NA	Q9H147	TH216Y
Q9H6H4_115	20	10.1553	Q9H6H4	TH216Y
Q9HB71_71	20	0	Q9HB71	TH216Y
Q9NPH2_385	20	NA	Q9NPH2	TH216Y
Q9NQC3_1091	20	0	Q9NQC3	TH216Y
Q9NQG5_61	20	NA	Q9NQG5	TH216Y
Q9NR50_264	20	8.87641	Q9NR50	TH216Y
Q9NR50_278	20	NA	Q9NR50	TH216Y
Q9NRF8_94	20	NA	Q9NRF8	TH216Y
Q9NRR5_286	20	0	Q9NRR5	TH216Y
Q9NSE4_543	20	NA	Q9NSE4	TH216Y
Q9NT62_18	20	0	Q9NT62	TH216Y
Q9NTJ5_272	20	0	Q9NTJ5	TH216Y
Q9NTX5_274	20	NA	Q9NTX5	TH216Y
Q9NUJ1_87	20	0	Q9NUJ1	TH216Y
Q9NUU7_107	20	NA	Q9NUU7	TH216Y
Q9NVE7_258	20	NA	Q9NVE7	TH216Y
Q9NVN8_489	20	NA	Q9NVN8	TH216Y
Q9NX20_233	20	0	Q9NX20	TH216Y
Q9NY33_417	20	NA	Q9NY33	TH216Y
Q9NZ32_377	20	0	Q9NZ32	TH216Y
Q9P2R7_84	20	0	Q9P2R7	TH216Y
Q9UBT2_101	20	NA	Q9UBT2	TH216Y
Q9UFN0_32	20	0	Q9UFN0	TH216Y
Q9UGU5_462	20	NA	Q9UGU5	TH216Y
Q9UHD8_387	20	NA	Q9UHD8	TH216Y
Q9UHD8_473	20	NA	Q9UHD8	TH216Y
Q9UI15_192	20	0	Q9UI15	TH216Y
Q9UKF7_17	20	NA	Q9UKF7	TH216Y
Q9ULV4_304	20	NA	Q9ULV4	TH216Y
Q9UMX5_137	20	0	Q9UMX5	TH216Y
Q9UQE7_168	20	0	Q9UQE7	TH216Y
Q9Y223_156	20	10.8907	Q9Y223	TH216Y
Q9Y230_215	20	0	Q9Y230	TH216Y
Q9Y230_442	20	7.98714	Q9Y230	TH216Y
Q9Y262_247	20	0	Q9Y262	TH216Y
Q9Y262_89	20	4.46019	Q9Y262	TH216Y
Q9Y265_150	20	0	Q9Y265	TH216Y
Q9Y265_454	20	0	Q9Y265	TH216Y
Q9Y277_67	20	3.9443	Q9Y277	TH216Y
Q9Y285_305	20	NA	Q9Y285	TH216Y
Q9Y285_310	20	0	Q9Y285	TH216Y
Q9Y2R9_126	20	0	Q9Y2R9	TH216Y
Q9Y2R9_168	20	0	Q9Y2R9	TH216Y
Q9Y371_155	20	4.94568	Q9Y371	TH216Y
Q9Y3Z3_456	20	NA	Q9Y3Z3	TH216Y
Q9Y4C2_542	20	10.014	Q9Y4C2	TH216Y
Q9Y4L1_99	20	0	Q9Y4L1	TH216Y
Q9Y5V3_738	20	0	Q9Y5V3	TH216Y
Q9Y617_131	20	0	Q9Y617	TH216Y
Q9Y678_531	20	8.3447	Q9Y678	TH216Y
O94925_249	19.9803	0.0227397	O94925	TH216Y
Q9UG63_503	19.9695	0.0176318	Q9UG63	TH216Y
Q14974_76	19.9539	0.0652008	Q14974	TH216Y
P62280_55	19.942	7.17307	P62280	TH216Y
P04075_328	19.9102	2.78657	P04075	TH216Y
P25787_167	19.8805	0.169021	P25787	TH216Y
P18124_139	19.8059	NA	P18124	TH216Y
P09960_233	19.7559	NA	P09960	TH216Y
Q9Y285_350	19.7397	9.06764	Q9Y285	TH216Y
P43490_188	19.733	0.377601	P43490	TH216Y
Q9NYV4_892	19.732	NA	Q9NYV4	TH216Y
P61158_16	19.7171	0.400119	P61158	TH216Y
Q15293_115	19.7106	5.6922	Q15293	TH216Y
P09211_80	19.7054	7.04735	P09211	TH216Y
P12004_114	19.6962	0.350782	P12004	TH216Y
O43660_385	19.6563	NA	O43660	TH216Y
P62195_121	19.6122	5.15758	P62195	TH216Y
O14654_1038	19.5854	0.753815	O14654	TH216Y
P62750_117	19.5613	0.506589	P62750	TH216Y
O60271_518	19.5098	8.82742	O60271	TH216Y
Q99729_240	19.4944	9.29453	Q99729	TH216Y
P48643_280	19.4716	0.747207	P48643	TH216Y
P18583_935	19.4644	0.61841	P18583	TH216Y
O00487_234	19.4608	0.762555	O00487	TH216Y
P04406_314	19.4515	3.1191	P04406	TH216Y
Q14126_476	19.4492	2.95972	Q14126	TH216Y
P49327_1996	19.4289	1.67864	P49327	TH216Y
Q2NKX8_381	19.3527	NA	Q2NKX8	TH216Y
P36507_233	19.242	8.51227	P36507	TH216Y
P06733_57	19.1995	1.13208	P06733	TH216Y
O96017_404	19.189	0.936472	O96017	TH216Y
P63173_41	19.1605	1.18723	P63173	TH216Y
P07814_546	19.149	1.20352	P07814	TH216Y
P49585_240	19.1402	8.67634	P49585	TH216Y
P68363_108	19.1234	3.98314	P68363	TH216Y
P06733_189	19.0909	5.17962	P06733	TH216Y
Q7Z6Z7_3142	19.0869	1.29127	Q7Z6Z7	TH216Y
P09874_309	19.0579	NA	P09874	TH216Y
P18124_144	19.0464	1.34853	P18124	TH216Y
P08238_192	19.0385	1.35981	P08238	TH216Y
P49790_382	18.9995	NA	P49790	TH216Y
P40939_271	18.9868	9.64672	P40939	TH216Y
Q9UJW0_150	18.9118	2.3973	Q9UJW0	TH216Y
P08238_619	18.845	1.63337	P08238	TH216Y
O94776_483	18.8413	NA	O94776	TH216Y
P30566_294	18.7768	1.72983	P30566	TH216Y
P12277_125	18.7662	1.96421	P12277	TH216Y
Q01518_31	18.7569	1.75805	Q01518	TH216Y
A0AVT1_873	18.7172	NA	A0AVT1	TH216Y
O14979_167	18.6984	1.84079	O14979	TH216Y
Q9UMS4_405	18.6967	NA	Q9UMS4	TH216Y
P15880_133	18.6906	8.27385	P15880	TH216Y
P35914_176	18.6853	1.85929	P35914	TH216Y
P07237_99	18.6811	1.52297	P07237	TH216Y
O14654_828	18.6631	4.42566	O14654	TH216Y
P06748_29	18.6556	7.19133	P06748	TH216Y
P45954_283	18.5999	1.98008	P45954	TH216Y
O43765_181	18.5671	1.73046	O43765	TH216Y
Q16576_283	18.5548	7.54095	Q16576	TH216Y
P19623_278	18.5508	2.04943	P19623	TH216Y
P23743_19	18.5144	1.77874	P23743	TH216Y
P06576_247	18.4737	1.11638	P06576	TH216Y
P00505_284	18.4704	NA	P00505	TH216Y
Q9UI10_307	18.4595	NA	Q9UI10	TH216Y
Q13263_242	18.4389	9.25039	Q13263	TH216Y
P68104_86	18.4318	NA	P68104	TH216Y
P62244_46	18.4001	2.26256	P62244	TH216Y
Q9H773_102	18.3747	1.8767	Q9H773	TH216Y
Q9UNF1_317	18.3612	NA	Q9UNF1	TH216Y
P07737_129	18.3312	1.92698	P07737	TH216Y
P15880_169	18.321	1.02334	P15880	TH216Y
P18669_142	18.2992	1.96394	P18669	TH216Y
P83731_55	18.2891	1.01979	P83731	TH216Y
P35606_761	18.2758	2.79443	P35606	TH216Y
P06493_286	18.2566	4.14454	P06493	TH216Y
P23528_85	18.2478	1.66844	P23528	TH216Y
P40937_26	18.2399	2.48912	P40937	TH216Y
Q86VP6_797	18.2	NA	Q86VP6	TH216Y
Q14157_858	18.1805	2.23403	Q14157	TH216Y
P14868_24	18.1785	2.57602	P14868	TH216Y
P62258_152	18.1746	10.9087	P62258	TH216Y
Q14498_464	18.1642	1.13069	Q14498	TH216Y
Q8NC51_207	18.1254	NA	Q8NC51	TH216Y
P23743_60	18.0882	6.99803	P23743	TH216Y
P00374_122	17.9939	NA	P00374	TH216Y
P62913_170	17.9653	1.6341	P62913	TH216Y
O60664_251	17.9581	1.82867	O60664	TH216Y
Q05048_213	17.9506	0	Q05048	TH216Y
P68363_312	17.9424	2.44202	P68363	TH216Y
Q04760_136	17.9282	2.93004	Q04760	TH216Y
Q9NTI5_419	17.9213	NA	Q9NTI5	TH216Y
Q86VR2_49	17.9183	2.94403	Q86VR2	TH216Y
P46781_96	17.9034	5.32449	P46781	TH216Y
P68363_24	17.8932	2.97945	P68363	TH216Y
Q99986_107	17.8898	NA	Q99986	TH216Y
Q9HAH7_406	17.88	NA	Q9HAH7	TH216Y
P61254_78	17.8648	NA	P61254	TH216Y
P31946_50	17.86	8.76179	P31946	TH216Y
P61981_49	17.86	8.76179	P61981	TH216Y
O14818_118	17.8476	8.91298	O14818	TH216Y
Q8TAA3_126	17.8476	8.91298	Q8TAA3	TH216Y
P60709_240	17.8057	3.62346	P60709	TH216Y
P34897_96	17.797	1.21444	P34897	TH216Y
Q14204_2641	17.7895	3.12611	Q14204	TH216Y
Q99961_57	17.7705	3.15306	Q99961	TH216Y
P33993_403	17.7601	4.54014	P33993	TH216Y
P18621_139	17.7144	0	P18621	TH216Y
O94776_13	17.6764	NA	O94776	TH216Y
P68104_418	17.6095	7.54625	P68104	TH216Y
Q5VTE0_418	17.6095	7.54625	Q5VTE0	TH216Y
P62913_92	17.5936	3.40317	P62913	TH216Y
P15170_146	17.5487	3.46664	P15170	TH216Y
P23743_258	17.5342	3.70762	P23743	TH216Y
P04406_140	17.5251	2.03451	P04406	TH216Y
P49327_1924	17.5229	NA	P49327	TH216Y
P53597_78	17.5185	1.97749	P53597	TH216Y
P27708_1322	17.4906	7.07223	P27708	TH216Y
Q13509_51	17.4813	8.13509	Q13509	TH216Y
P78371_408	17.4402	2.95582	P78371	TH216Y
O43390_431	17.4181	7.34762	O43390	TH216Y
P08243_517	17.3706	10.0564	P08243	TH216Y
Q6ICB0_12	17.3576	5.55188	Q6ICB0	TH216Y
P41252_608	17.3574	6.87829	P41252	TH216Y
P40937_236	17.3465	NA	P40937	TH216Y
Q13435_568	17.3191	3.55119	Q13435	TH216Y
P21281_378	17.2994	NA	P21281	TH216Y
P10253_407	17.2733	8.38661	P10253	TH216Y
Q05639_177	17.2416	5.05557	Q05639	TH216Y
Q29RF7_472	17.2334	3.91252	Q29RF7	TH216Y
O43242_213	17.2136	NA	O43242	TH216Y
P30876_1018	17.2135	2.43827	P30876	TH216Y
P07437_51	17.1866	6.48458	P07437	TH216Y
Q86VP6_784	17.182	3.9852	Q86VP6	TH216Y
Q96PK6_249	17.1741	NA	Q96PK6	TH216Y
P33992_332	17.1708	3.26687	P33992	TH216Y
Q07864_1381	17.1489	NA	Q07864	TH216Y
P12268_509	17.1379	4.00429	P12268	TH216Y
P00338_281	17.0865	4.12037	P00338	TH216Y
P48643_420	17.0729	NA	P48643	TH216Y
P08670_276	17.0309	1.19238	P08670	TH216Y
P07195_84	17.0062	2.16086	P07195	TH216Y
P13639_634	16.999	4.24407	P13639	TH216Y
P31948_323	16.9653	4.29173	P31948	TH216Y
P58876_122	16.9254	5.86448	P58876	TH216Y
Q99880_122	16.9254	5.86448	Q99880	TH216Y
P00374_157	16.9059	3.57273	P00374	TH216Y
Q9NZ01_44	16.8803	4.41193	Q9NZ01	TH216Y
P55327_136	16.8558	4.44652	P55327	TH216Y
Q9BZE1_50	16.8549	NA	Q9BZE1	TH216Y
Q00839_824	16.8428	4.46491	Q00839	TH216Y
Q12931_286	16.8078	4.51442	Q12931	TH216Y
P23528_140	16.7625	5.85375	P23528	TH216Y
Q9BWD1_237	16.7614	0	Q9BWD1	TH216Y
O43390_208	16.7563	0	O43390	TH216Y
P55209_106	16.7534	4.59132	P55209	TH216Y
O76031_529	16.7504	4.59564	O76031	TH216Y
Q99471_71	16.7337	4.6193	Q99471	TH216Y
P18754_194	16.6815	0	P18754	TH216Y
P68363_161	16.6671	4.34249	P68363	TH216Y
Q12996_534	16.6662	NA	Q12996	TH216Y
Q14203_1149	16.6386	6.65918	Q14203	TH216Y
P55209_66	16.6273	3.00429	P55209	TH216Y
Q9Y2R9_64	16.6264	4.771	Q9Y2R9	TH216Y
P07900_528	16.6238	9.16787	P07900	TH216Y
Q14204_2881	16.5995	4.809	Q14204	TH216Y
P61247_133	16.5968	3.0338	P61247	TH216Y
P30101_356	16.5649	NA	P30101	TH216Y
P09429_144	16.5454	4.35584	P09429	TH216Y
P63104_149	16.5357	4.8993	P63104	TH216Y
Q99832_438	16.4957	2.8477	Q99832	TH216Y
P60709_53	16.4323	NA	P60709	TH216Y
Q9UBQ5_32	16.3826	4.17697	Q9UBQ5	TH216Y
P08758_94	16.3194	5.20511	P08758	TH216Y
O00299_209	16.31	8.94421	O00299	TH216Y
Q9H8S9_95	16.3084	5.22064	Q9H8S9	TH216Y
P60709_91	16.3026	7.15162	P60709	TH216Y
P06733_257	16.3008	3.85723	P06733	TH216Y
P68104_177	16.2767	4.10667	P68104	TH216Y
Q5VTE0_177	16.2767	4.10667	Q5VTE0	TH216Y
P61254_74	16.2374	5.32118	P61254	TH216Y
O00743_18	16.2361	NA	O00743	TH216Y
P29401_321	16.1988	4.38929	P29401	TH216Y
P15880_250	16.1543	6.61859	P15880	TH216Y
P27797_57	16.1537	4.84234	P27797	TH216Y
P07900_61	16.1433	4.9869	P07900	TH216Y
P40926_161	16.1032	5.11366	P40926	TH216Y
P04181_55	16.095	4.5091	P04181	TH216Y
P41240_64	16.0928	5.52567	P41240	TH216Y
Q14980_1876	16.076	5.5493	Q14980	TH216Y
O14744_307	16.0339	NA	O14744	TH216Y
P35637_325	16.0313	NA	P35637	TH216Y
P49790_29	16.0222	5.21891	P49790	TH216Y
O43684_65	15.9701	NA	O43684	TH216Y
Q9H2W6_213	15.9354	5.74818	Q9H2W6	TH216Y
P62841_37	15.898	0	P62841	TH216Y
P34897_100	15.8938	2.92642	P34897	TH216Y
P36578_161	15.8805	1.27496	P36578	TH216Y
P60709_306	15.873	5.11671	P60709	TH216Y
P25705_321	15.8362	5.88844	P25705	TH216Y
P20618_158	15.833	5.89305	P20618	TH216Y
P34897_228	15.8316	5.89503	P34897	TH216Y
P62258_20	15.8188	4.24192	P62258	TH216Y
P08237_103	15.8176	4.28088	P08237	TH216Y
P60228_401	15.78	5.96798	P60228	TH216Y
P10809_223	15.7486	5.64133	P10809	TH216Y
P46782_45	15.7461	6.01598	P46782	TH216Y
Q15393_1167	15.7354	7.95885	Q15393	TH216Y
P26641_24	15.7325	6.03521	P26641	TH216Y
Q7Z6Z7_697	15.7275	0.154814	Q7Z6Z7	TH216Y
O43684_141	15.7065	NA	O43684	TH216Y
Q14204_2748	15.7043	NA	Q14204	TH216Y
Q8N8N7_51	15.6932	6.09821	Q8N8N7	TH216Y
P49207_32	15.6713	1.31994	P49207	TH216Y
Q29RF7_429	15.6482	NA	Q29RF7	TH216Y
P40925_119	15.6471	6.25349	P40925	TH216Y
P61163_94	15.6328	6.1762	P61163	TH216Y
Q92769_68	15.6172	6.19828	Q92769	TH216Y
Q9BZK7_480	15.5965	NA	Q9BZK7	TH216Y
Q9Y2L1_106	15.5939	NA	Q9Y2L1	TH216Y
Q8N999_50	15.5921	6.23372	Q8N999	TH216Y
P11177_77	15.5901	6.23648	P11177	TH216Y
P46779_40	15.57	1.81833	P46779	TH216Y
Q9BWF3_37	15.4804	6.39171	Q9BWF3	TH216Y
P21796_67	15.4527	2.18739	P21796	TH216Y
P62847_76	15.4114	5.41419	P62847	TH216Y
Q9Y673_74	15.4057	6.49735	Q9Y673	TH216Y
Q16890_96	15.3783	0.720693	Q16890	TH216Y
P62841_115	15.3768	NA	P62841	TH216Y
P48556_342	15.3634	9.3778	P48556	TH216Y
P49327_289	15.3554	5.36314	P49327	TH216Y
P41214_418	15.3549	6.66455	P41214	TH216Y
Q9NRX4_52	15.3495	6.57678	Q9NRX4	TH216Y
Q8N1F7_386	15.3444	10.284	Q8N1F7	TH216Y
P56385_32	15.336	6.59591	P56385	TH216Y
Q14126_212	15.3161	6.62398	Q14126	TH216Y
P62847_81	15.3007	2.97235	P62847	TH216Y
P14866_47	15.29	6.66094	P14866	TH216Y
Q14203_1244	15.2508	9.61858	Q14203	TH216Y
P68363_319	15.2447	NA	P68363	TH216Y
P49327_222	15.2438	5.49199	P49327	TH216Y
Q8N1F7_801	15.2418	NA	Q8N1F7	TH216Y
Q9NRR5_279	15.2232	8.76324	Q9NRR5	TH216Y
Q9UMX0_269	15.2232	8.76324	Q9UMX0	TH216Y
Q9Y3F4_252	15.2206	NA	Q9Y3F4	TH216Y
P07437_222	15.1855	3.37326	P07437	TH216Y
P42677_31	15.1626	4.70261	P42677	TH216Y
P07437_59	15.1474	4.69087	P07437	TH216Y
Q9P2J5_666	15.1279	6.89017	Q9P2J5	TH216Y
Q99497_141	15.1176	6.9047	Q99497	TH216Y
O00567_152	15.0884	2.6604	O00567	TH216Y
Q00839_669	15.073	4.14264	Q00839	TH216Y
Q09028_154	15.0675	7.52002	Q09028	TH216Y
Q13509_50	15.0583	4.99938	Q13509	TH216Y
P31948_354	15.0304	7.02812	P31948	TH216Y
P25685_67	14.9983	2.52208	P25685	TH216Y
P62750_74	14.9781	7.10208	P62750	TH216Y
P48735_285	14.9618	7.12511	P48735	TH216Y
P62280_95	14.9018	2.2022	P62280	TH216Y
P19338_473	14.8649	1.46776	P19338	TH216Y
Q9BU89_290	14.8552	7.27578	Q9BU89	TH216Y
Q14103_244	14.8199	1.95633	Q14103	TH216Y
Q13547_226	14.8066	7.34458	Q13547	TH216Y
Q14980_1774	14.7944	8.51321	Q14980	TH216Y
P49327_2269	14.769	3.88917	P49327	TH216Y
Q96PU8_328	14.7549	7.40511	Q96PU8	TH216Y
O43252_396	14.7323	0	O43252	TH216Y
P52272_64	14.7137	NA	P52272	TH216Y
Q8NHH9_470	14.6525	6.86805	Q8NHH9	TH216Y
O43837_340	14.621	NA	O43837	TH216Y
O43837_121	14.6173	7.61229	O43837	TH216Y
Q00839_825	14.5977	4.17335	Q00839	TH216Y
P29401_309	14.5903	6.24657	P29401	TH216Y
Q9BWF3_25	14.5823	6.93324	Q9BWF3	TH216Y
P09211_50	14.5696	9.02642	P09211	TH216Y
P11310_183	14.5633	7.68859	P11310	TH216Y
P00338_127	14.5633	NA	P00338	TH216Y
P62979_85	14.5529	9.07169	P62979	TH216Y
Q14247_84	14.5351	5.75467	Q14247	TH216Y
P63173_43	14.5342	8.3544	P63173	TH216Y
P46779_102	14.5298	6.19995	P46779	TH216Y
P06493_237	14.5187	NA	P06493	TH216Y
P26639_540	14.5064	0	P26639	TH216Y
Q8N0X7_579	14.4826	7.80279	Q8N0X7	TH216Y
P23743_22	14.4371	1.44799	P23743	TH216Y
Q00839_613	14.4331	3.81767	Q00839	TH216Y
P68371_36	14.3874	8.10556	P68371	TH216Y
Q9Y3F4_250	14.3601	NA	Q9Y3F4	TH216Y
Q6UB35_877	14.3579	6.51494	Q6UB35	TH216Y
Q9BVA1_159	14.3559	5.48202	Q9BVA1	TH216Y
P51570_236	14.3554	6.68303	P51570	TH216Y
Q14204_4252	14.3523	6.04075	Q14204	TH216Y
P25205_147	14.3482	7.99283	P25205	TH216Y
P43897_234	14.3461	7.99589	P43897	TH216Y
O60884_69	14.3054	3.70925	O60884	TH216Y
Q9P2J5_183	14.2613	NA	Q9P2J5	TH216Y
P00338_10	14.2537	7.38633	P00338	TH216Y
P06576_269	14.2183	2.99116	P06576	TH216Y
Q13547_87	14.1932	NA	Q13547	TH216Y
P17987_190	14.1828	7.97696	P17987	TH216Y
P63241_69	14.1748	4.67286	P63241	TH216Y
P60709_294	14.1436	NA	P60709	TH216Y
O14981_1465	14.126	NA	O14981	TH216Y
P06576_292	14.1199	NA	P06576	TH216Y
P25705_337	14.1182	1.6828	P25705	TH216Y
P33993_345	14.1166	7.16035	P33993	TH216Y
P07900_492	14.0977	3.61093	P07900	TH216Y
P34897_370	14.0951	8.35082	P34897	TH216Y
P68032_93	14.0693	NA	P68032	TH216Y
O95163_1182	14.0661	8.39178	O95163	TH216Y
P52597_194	14.0446	4.7327	P52597	TH216Y
P62942_27	14.0442	0.929129	P62942	TH216Y
Q9Y230_430	14.0302	NA	Q9Y230	TH216Y
Q6UWP2_166	14.013	7.57044	Q6UWP2	TH216Y
O60271_654	14.0113	4.10044	O60271	TH216Y
P12268_110	14.0108	4.50817	P12268	TH216Y
P23743_623	14.0032	7.01462	P23743	TH216Y
Q9HB71_181	13.9948	8.12021	Q9HB71	TH216Y
Q9HB71_199	13.9312	2.62542	Q9HB71	TH216Y
P68363_224	13.921	NA	P68363	TH216Y
P62277_18	13.9056	4.86026	P62277	TH216Y
P62906_11	13.8974	4.44252	P62906	TH216Y
P29401_275	13.8735	1.68132	P29401	TH216Y
P46734_214	13.8694	8.67002	P46734	TH216Y
P49327_2015	13.8689	NA	P49327	TH216Y
P46779_25	13.8627	NA	P46779	TH216Y
Q9Y6C9_95	13.8576	8.6867	Q9Y6C9	TH216Y
Q9Y285_409	13.8483	NA	Q9Y285	TH216Y
P62979_106	13.8292	8.72686	P62979	TH216Y
Q9H773_141	13.8152	8.74666	Q9H773	TH216Y
P62937_79	13.7947	4.42229	P62937	TH216Y
Q9UQ80_343	13.7664	8.81564	Q9UQ80	TH216Y
P46779_77	13.7397	2.25469	P46779	TH216Y
P36578_277	13.7331	5.00246	P36578	TH216Y
P68363_408	13.727	NA	P68363	TH216Y
P22033_110	13.719	8.88272	P22033	TH216Y
P11172_16	13.7111	NA	P11172	TH216Y
P52888_221	13.6813	8.93595	P52888	TH216Y
P60709_188	13.6635	3.85039	P60709	TH216Y
Q01518_419	13.6437	8.33208	Q01518	TH216Y
P08243_40	13.5937	NA	P08243	TH216Y
P10155_156	13.5754	0	P10155	TH216Y
P62701_149	13.5665	0.962659	P62701	TH216Y
P52292_485	13.5629	9.10346	P52292	TH216Y
Q02790_113	13.5425	9.33316	Q02790	TH216Y
P43243_508	13.5388	9.13751	P43243	TH216Y
P62191_259	13.5148	NA	P62191	TH216Y
P51948_271	13.4865	NA	P51948	TH216Y
Q14126_368	13.4814	2.6323	Q14126	TH216Y
Q9NR46_77	13.4635	6.0616	Q9NR46	TH216Y
P17987_121	13.4448	7.783	P17987	TH216Y
P14625_678	13.4407	6.27261	P14625	TH216Y
P17844_442	13.4229	3.2172	P17844	TH216Y
Q16576_153	13.4215	NA	Q16576	TH216Y
P78527_3705	13.4055	9.27406	P78527	TH216Y
Q9Y277_173	13.3942	9.34202	Q9Y277	TH216Y
P61254_135	13.3776	NA	P61254	TH216Y
Q14204_2873	13.352	3.75024	Q14204	TH216Y
O00264_113	13.3409	1.32476	O00264	TH216Y
P05141_165	13.3251	9.43967	P05141	TH216Y
O00567_210	13.3199	1.74991	O00567	TH216Y
P53621_1177	13.3132	NA	P53621	TH216Y
P23743_218	13.3032	9.36418	P23743	TH216Y
P51532_507	13.2786	NA	P51532	TH216Y
Q13547_204	13.2555	6.85796	Q13547	TH216Y
P49368_359	13.2464	7.79838	P49368	TH216Y
Q99714_168	13.241	7.80466	Q99714	TH216Y
P27797_150	13.1743	6.50287	P27797	TH216Y
Q9BTW9_1008	13.1711	NA	Q9BTW9	TH216Y
P11940_140	13.1675	9.66265	P11940	TH216Y
P40227_109	13.1509	6.57772	P40227	TH216Y
Q92526_109	13.1509	6.57772	Q92526	TH216Y
P62701_54	13.1488	NA	P62701	TH216Y
P68104_85	13.1261	7.68276	P68104	TH216Y
Q5VTE0_85	13.1261	7.68276	Q5VTE0	TH216Y
P08243_488	13.1	7.71411	P08243	TH216Y
O14737_73	13.0933	3.87382	O14737	TH216Y
P60900_96	13.0831	5.77321	P60900	TH216Y
Q99986_317	13.0739	NA	Q99986	TH216Y
P06733_44	13.0683	6.10144	P06733	TH216Y
Q9Y3Z3_331	13.0653	9.80713	Q9Y3Z3	TH216Y
P31689_33	13.0368	2.48191	P31689	TH216Y
P27824_185	13.0077	9.88857	P27824	TH216Y
P60900_105	13.0062	1.95472	P60900	TH216Y
Q9P2J5_52	13.0003	NA	Q9P2J5	TH216Y
P78527_3791	12.999	0	P78527	TH216Y
Q6IA86_568	12.9939	9.90808	Q6IA86	TH216Y
Q8IU81_130	12.9871	4.60436	Q8IU81	TH216Y
P46379_793	12.9867	8.22241	P46379	TH216Y
P62280_92	12.9828	4.08309	P62280	TH216Y
Q99541_82	12.9784	4.29974	Q99541	TH216Y
Q6ZRS2_599	12.9617	NA	Q6ZRS2	TH216Y
Q9Y371_80	12.9602	2.40228	Q9Y371	TH216Y
P09104_189	12.9523	9.96693	P09104	TH216Y
P04181_50	12.9361	8.15669	P04181	TH216Y
P00558_161	12.9054	6.06375	P00558	TH216Y
Q9BQA1_163	12.8995	10.0417	Q9BQA1	TH216Y
Q15003_635	12.8928	4.92648	Q15003	TH216Y
P36578_264	12.8875	NA	P36578	TH216Y
O43399_126	12.885	5.37577	O43399	TH216Y
Q13217_262	12.8661	6.51599	Q13217	TH216Y
O15371_50	12.8372	10.1297	O15371	TH216Y
Q00610_731	12.8317	6.71491	Q00610	TH216Y
Q14566_111	12.8294	NA	Q14566	TH216Y
P42765_20	12.8169	6.36712	P42765	TH216Y
P60709_198	12.8086	NA	P60709	TH216Y
P11586_240	12.8031	2.92073	P11586	TH216Y
P49411_179	12.7775	2.99559	P49411	TH216Y
P62241_109	12.777	4.45138	P62241	TH216Y
P0DMV8_545	12.7573	5.89756	P0DMV8	TH216Y
P32322_135	12.751	10.2516	P32322	TH216Y
P62937_48	12.7507	2.183	P62937	TH216Y
O75533_1288	12.7133	0.0855945	O75533	TH216Y
P29692_26	12.7105	5.3321	P29692	TH216Y
Q7Z4W1_149	12.698	6.07747	Q7Z4W1	TH216Y
Q92947_398	12.6789	10.3537	Q92947	TH216Y
P17812_354	12.6722	7.63186	P17812	TH216Y
P14868_245	12.666	7.06662	P14868	TH216Y
P83881_34	12.6605	8.08234	P83881	TH216Y
P62241_149	12.6464	2.38989	P62241	TH216Y
P53621_569	12.6272	6.73985	P53621	TH216Y
Q9NQC3_1165	12.6202	3.89134	Q9NQC3	TH216Y
P55060_278	12.6178	5.10468	P55060	TH216Y
P23743_42	12.615	10.444	P23743	TH216Y
P62851_109	12.5989	4.9776	P62851	TH216Y
P60174_202	12.5787	4.73019	P60174	TH216Y
P07814_224	12.5787	7.56646	P07814	TH216Y
Q9NTJ3_197	12.5609	9.6793	Q9NTJ3	TH216Y
P31943_356	12.5521	10.5329	P31943	TH216Y
Q6P996_525	12.5506	10.5351	Q6P996	TH216Y
Q9UHD9_265	12.5252	1.90228	Q9UHD9	TH216Y
Q00839_257	12.5104	0.531449	Q00839	TH216Y
Q14204_2892	12.5096	5.14639	Q14204	TH216Y
Q92945_317	12.5033	5.35503	Q92945	TH216Y
P12004_249	12.5027	3.25868	P12004	TH216Y
P50990_468	12.4923	6.44568	P50990	TH216Y
Q14566_418	12.4861	8.65438	Q14566	TH216Y
P30086_181	12.48	3.22331	P30086	TH216Y
Q00839_820	12.4777	5.45177	Q00839	TH216Y
Q6BDS2_367	12.4765	NA	Q6BDS2	TH216Y
P25205_19	12.4756	NA	P25205	TH216Y
P08238_56	12.4411	7.59546	P08238	TH216Y
O43347_241	12.4347	10.6989	O43347	TH216Y
Q00341_465	12.4271	10.7097	Q00341	TH216Y
P14618_466	12.4031	5.0095	P14618	TH216Y
Q9UKF7_149	12.3837	10.771	Q9UKF7	TH216Y
P08758_148	12.3786	10.7783	P08758	TH216Y
P24928_43	12.3761	NA	P24928	TH216Y
P31942_85	12.3751	0.477105	P31942	TH216Y
Q16543_155	12.3584	10.8069	Q16543	TH216Y
P36578_211	12.3462	0.444712	P36578	TH216Y
P13797_601	12.3341	1.95624	P13797	TH216Y
P24534_126	12.334	0.0329127	P24534	TH216Y
O75533_1249	12.3243	6.02052	O75533	TH216Y
P68363_282	12.3078	NA	P68363	TH216Y
P31689_376	12.3034	NA	P31689	TH216Y
Q8WUM4_233	12.2838	0.145486	Q8WUM4	TH216Y
Q92616_2186	12.2805	9.76363	Q92616	TH216Y
Q6P1L8_51	12.2766	NA	Q6P1L8	TH216Y
Q99832_358	12.2755	8.91948	Q99832	TH216Y
P31943_372	12.2474	10.9638	P31943	TH216Y
O43172_470	12.2456	5.42763	O43172	TH216Y
P26640_428	12.2229	10.9985	P26640	TH216Y
Q9H903_248	12.2223	9.81372	Q9H903	TH216Y
Q8NCW5_255	12.2138	3.50714	Q8NCW5	TH216Y
Q8IXJ6_104	12.1945	11.0387	Q8IXJ6	TH216Y
P11310_419	12.184	6.84388	P11310	TH216Y
P62826_146	12.149	2.48903	P62826	TH216Y
P61981_20	12.1489	9.06564	P61981	TH216Y
P55786_224	12.1405	0.256014	P55786	TH216Y
P68371_50	12.1238	0.0420002	P68371	TH216Y
Q9NSE4_260	12.1006	6.30929	Q9NSE4	TH216Y
P18669_92	12.0993	NA	P18669	TH216Y
P51532_731	12.0781	11.2032	P51532	TH216Y
P30101_222	12.0559	11.2347	P30101	TH216Y
P55072_495	12.0376	NA	P55072	TH216Y
P52701_642	12.0317	11.2688	P52701	TH216Y
P25705_343	12.021	6.08684	P25705	TH216Y
P0DMV8_611	11.9831	NA	P0DMV8	TH216Y
P46777_210	11.9544	0.26368	P46777	TH216Y
O14818_106	11.9291	6.82829	O14818	TH216Y
Q8TAA3_114	11.9291	6.82829	Q8TAA3	TH216Y
P04406_255	11.9242	NA	P04406	TH216Y
P62081_177	11.9228	4.71549	P62081	TH216Y
P08238_520	11.917	0.855254	P08238	TH216Y
Q05048_170	11.887	11.4734	Q05048	TH216Y
P08865_39	11.8854	NA	P08865	TH216Y
O00299_214	11.8691	NA	O00299	TH216Y
Q9NRV9_138	11.8681	7.40112	Q9NRV9	TH216Y
P60842_50	11.8548	4.07662	P60842	TH216Y
P61163_242	11.835	8.3513	P61163	TH216Y
P13639_579	11.8292	NA	P13639	TH216Y
P68363_399	11.7997	NA	P68363	TH216Y
P31948_476	11.7878	1.71744	P31948	TH216Y
Q5JRX3_538	11.7756	0.0802671	Q5JRX3	TH216Y
P08238_276	11.7739	2.24745	P08238	TH216Y
P04406_320	11.7533	6.29049	P04406	TH216Y
P00505_316	11.729	11.6969	P00505	TH216Y
Q9H773_129	11.7264	4.42295	Q9H773	TH216Y
P07900_493	11.7243	4.54763	P07900	TH216Y
P04075_174	11.7234	11.7049	P04075	TH216Y
P68104_167	11.6896	NA	P68104	TH216Y
Q5VTE0_167	11.6896	NA	Q5VTE0	TH216Y
Q8NEV1_307	11.6816	11.7641	Q8NEV1	TH216Y
Q96HN2_608	11.652	5.65437	Q96HN2	TH216Y
P62136_70	11.6486	3.7594	P62136	TH216Y
P42704_1328	11.63	11.837	P42704	TH216Y
P38606_377	11.6299	11.8372	P38606	TH216Y
P55795_306	11.6186	NA	P55795	TH216Y
P07900_627	11.6145	NA	P07900	TH216Y
Q16576_180	11.5843	NA	Q16576	TH216Y
P28074_171	11.5619	11.8895	P28074	TH216Y
Q86VP6_372	11.5369	1.95454	Q86VP6	TH216Y
P46781_35	11.5314	4.02032	P46781	TH216Y
P82663_34	11.531	1.0989	P82663	TH216Y
Q12931_327	11.5182	0.776414	Q12931	TH216Y
P33993_126	11.5133	NA	P33993	TH216Y
Q14204_4205	11.5043	4.37903	Q14204	TH216Y
P41091_330	11.4976	5.51933	P41091	TH216Y
P55209_110	11.4864	0.691046	P55209	TH216Y
P61923_35	11.4827	12.0453	P61923	TH216Y
Q13885_50	11.4822	4.51232	Q13885	TH216Y
P48643_446	11.4494	8.07028	P48643	TH216Y
P78527_682	11.4324	0	P78527	TH216Y
P68104_254	11.4103	2.64792	P68104	TH216Y
Q5VTE0_254	11.4103	2.64792	Q5VTE0	TH216Y
Q13838_265	11.4065	9.71213	Q13838	TH216Y
P13797_51	11.4061	0.891531	P13797	TH216Y
P38606_601	11.3878	12.1795	P38606	TH216Y
P13639_730	11.3754	3.76614	P13639	TH216Y
P68104_183	11.3743	NA	P68104	TH216Y
P13804_313	11.3368	0	P13804	TH216Y
P36578_184	11.3324	NA	P36578	TH216Y
P19338_351	11.3196	5.26896	P19338	TH216Y
Q02252_498	11.319	NA	Q02252	TH216Y
P06737_821	11.2921	2.15749	P06737	TH216Y
P35998_111	11.2883	NA	P35998	TH216Y
P62851_65	11.2831	6.0004	P62851	TH216Y
O75390_185	11.28	5.76552	O75390	TH216Y
P45974_70	11.2674	12.3498	P45974	TH216Y
O14818_145	11.2603	7.82239	O14818	TH216Y
Q8TAA3_153	11.2603	7.82239	Q8TAA3	TH216Y
P10809_243	11.2499	5.25885	P10809	TH216Y
P09211_8	11.2288	4.88978	P09211	TH216Y
P18077_34	11.2166	NA	P18077	TH216Y
P31153_92	11.1862	NA	P31153	TH216Y
P83731_14	11.1844	5.75105	P83731	TH216Y
Q9NTK5_350	11.1702	5.77118	Q9NTK5	TH216Y
P50991_24	11.1698	4.09593	P50991	TH216Y
Q14566_276	11.1599	0.55321	Q14566	TH216Y
P50990_173	11.1592	12.5028	P50990	TH216Y
P52701_589	11.1479	12.5188	P52701	TH216Y
P11142_134	11.1458	5.28375	P11142	TH216Y
P46781_13	11.114	5.39755	P46781	TH216Y
Q92616_774	11.1107	12.5713	Q92616	TH216Y
P50502_348	11.0937	11.6912	P50502	TH216Y
P49207_78	11.0879	12.6037	P49207	TH216Y
Q96KB5_74	11.071	11.6763	Q96KB5	TH216Y
Q96PK6_614	11.0676	12.6323	Q96PK6	TH216Y
P27824_514	11.0641	NA	P27824	TH216Y
P23743_335	11.0474	5.35124	P23743	TH216Y
P60660_29	10.9986	12.7299	P60660	TH216Y
Q13547_221	10.9887	NA	Q13547	TH216Y
P11177_334	10.9877	7.52514	P11177	TH216Y
P08708_53	10.9854	NA	P08708	TH216Y
P24752_90	10.9807	NA	P24752	TH216Y
P62241_198	10.9771	3.63891	P62241	TH216Y
P07237_327	10.9746	NA	P07237	TH216Y
P78347_79	10.9719	6.72189	P78347	TH216Y
P49458_51	10.9605	NA	P49458	TH216Y
O14654_112	10.9428	NA	O14654	TH216Y
P35998_249	10.9268	6.39013	P35998	TH216Y
O60814_41	10.9018	NA	O60814	TH216Y
P58876_41	10.9018	NA	P58876	TH216Y
P12268_459	10.8975	10.5107	P12268	TH216Y
Q92945_625	10.8819	2.89112	Q92945	TH216Y
P50213_186	10.8782	NA	P50213	TH216Y
P83731_11	10.8677	3.84836	P83731	TH216Y
Q92599_258	10.8638	12.9205	Q92599	TH216Y
Q9NZI8_206	10.8504	NA	Q9NZI8	TH216Y
P78347_920	10.8474	12.9437	P78347	TH216Y
Q9Y3F4_261	10.8354	NA	Q9Y3F4	TH216Y
P11586_258	10.8306	6.14448	P11586	TH216Y
Q00325_208	10.8292	2.24663	Q00325	TH216Y
O43399_106	10.8285	10.5903	O43399	TH216Y
P14625_355	10.8271	1.68736	P14625	TH216Y
P28838_377	10.8252	10.7989	P28838	TH216Y
O14737_80	10.803	9.46015	O14737	TH216Y
Q9UHD8_390	10.7961	NA	Q9UHD8	TH216Y
P39687_131	10.7957	2.25635	P39687	TH216Y
P04181_69	10.7784	NA	P04181	TH216Y
P31948_48	10.7474	0.392452	P31948	TH216Y
P48643_274	10.7065	5.00087	P48643	TH216Y
P09543_74	10.7057	NA	P09543	TH216Y
Q9Y4L1_443	10.6818	13.1779	Q9Y4L1	TH216Y
P06493_270	10.6681	8.19491	P06493	TH216Y
P00558_324	10.6449	1.23631	P00558	TH216Y
Q92616_1391	10.6373	4.33597	Q92616	TH216Y
Q99986_113	10.6301	13.2511	Q99986	TH216Y
P04075_204	10.6299	2.58635	P04075	TH216Y
P53396_1073	10.6226	13.2617	P53396	TH216Y
Q08J23_83	10.6211	NA	Q08J23	TH216Y
P0DMV8_525	10.6186	NA	P0DMV8	TH216Y
P33992_191	10.6173	5.63872	P33992	TH216Y
Q07866_223	10.6127	8.27544	Q07866	TH216Y
P14625_563	10.6054	NA	P14625	TH216Y
Q14204_2265	10.5988	13.2953	Q14204	TH216Y
P0DMV8_107	10.5867	6.64653	P0DMV8	TH216Y
P17812_468	10.5814	NA	P17812	TH216Y
P26599_430	10.5759	3.99581	P26599	TH216Y
P14625_677	10.5718	8.1184	P14625	TH216Y
Q14694_505	10.5672	7.03369	Q14694	TH216Y
P68363_103	10.558	9.08756	P68363	TH216Y
P63244_52	10.5528	0.20552	P63244	TH216Y
P49458_31	10.5315	13.3904	P49458	TH216Y
P46459_294	10.4978	NA	P46459	TH216Y
P61604_88	10.4892	1.31301	P61604	TH216Y
Q14318_364	10.4886	NA	Q14318	TH216Y
P24752_188	10.4834	NA	P24752	TH216Y
P40925_192	10.4551	13.4985	P40925	TH216Y
P08238_211	10.4426	5.69749	P08238	TH216Y
P23743_122	10.4284	NA	P23743	TH216Y
Q9NTI5_215	10.4123	NA	Q9NTI5	TH216Y
Q00839_327	10.3968	6.96065	Q00839	TH216Y
P49321_91	10.3947	0.522817	P49321	TH216Y
Q86Y56_649	10.3828	NA	Q86Y56	TH216Y
Q9Y265_405	10.3797	NA	Q9Y265	TH216Y
P10768_191	10.3682	0.485288	P10768	TH216Y
P11413_424	10.3656	13.6251	P11413	TH216Y
P22087_118	10.365	13.626	P22087	TH216Y
P08238_356	10.355	NA	P08238	TH216Y
Q6UXN9_102	10.3424	13.6579	Q6UXN9	TH216Y
P62249_49	10.3414	13.6593	P62249	TH216Y
Q9BPW8_261	10.3345	0.229525	Q9BPW8	TH216Y
P39019_54	10.3191	2.90647	P39019	TH216Y
Q9BVA1_310	10.3021	5.97597	Q9BVA1	TH216Y
P08238_305	10.2956	13.7241	P08238	TH216Y
P17987_131	10.2846	2.62864	P17987	TH216Y
P07900_604	10.2812	5.88246	P07900	TH216Y
P04181_123	10.2798	NA	P04181	TH216Y
Q92841_279	10.2606	13.7737	Q92841	TH216Y
P10809_227	10.2537	2.73427	P10809	TH216Y
P14625_401	10.2513	1.72263	P14625	TH216Y
P62873_59	10.2464	NA	P62873	TH216Y
P31948_451	10.2461	NA	P31948	TH216Y
P61978_138	10.2434	NA	P61978	TH216Y
Q9Y3F4_114	10.2411	13.8012	Q9Y3F4	TH216Y
O14641_362	10.235	NA	O14641	TH216Y
Q9Y4L1_116	10.2333	6.95549	Q9Y4L1	TH216Y
Q9H4L7_703	10.2284	7.32943	Q9H4L7	TH216Y
P06748_271	10.224	6.16629	P06748	TH216Y
Q92945_644	10.1632	13.9114	Q92945	TH216Y
Q02543_10	10.1553	2.43292	Q02543	TH216Y
Q9H4A3_2276	10.1497	13.9304	Q9H4A3	TH216Y
P18124_155	10.1427	0.130728	P18124	TH216Y
P06733_280	10.1426	NA	P06733	TH216Y
Q14204_4196	10.1352	5.44398	Q14204	TH216Y
Q9UHB9_618	10.1349	8.67655	Q9UHB9	TH216Y
P60709_166	10.1254	NA	P60709	TH216Y
P61353_75	10.1227	13.9686	P61353	TH216Y
P52597_253	10.1219	10.4966	P52597	TH216Y
Q99986_198	10.1139	NA	Q99986	TH216Y
O43615_265	10.1065	NA	O43615	TH216Y
P51398_119	10.1045	1.22184	P51398	TH216Y
P61353_85	10.0934	14.0101	P61353	TH216Y
Q2NL82_524	10.0758	14.035	Q2NL82	TH216Y
Q00839_525	10.0613	2.44121	Q00839	TH216Y
P62854_62	10.0604	9.52027	P62854	TH216Y
P53990_43	10.0462	14.0768	P53990	TH216Y
P13639_265	10.0379	NA	P13639	TH216Y
P78527_157	10.0261	NA	P78527	TH216Y
P35251_590	10.025	14.1068	P35251	TH216Y
Q92769_222	10.025	NA	Q92769	TH216Y
P31153_79	10.0016	1.33541	P31153	TH216Y
Q9BWJ5_18	9.99304	6.45628	Q9BWJ5	TH216Y
P05023_10	9.98651	NA	P05023	TH216Y
P17844_518	9.92618	1.81516	P17844	TH216Y
P78371_439	9.92572	NA	P78371	TH216Y
Q13838_39	9.90466	2.03693	Q13838	TH216Y
O14818_21	9.86467	NA	O14818	TH216Y
Q15019_17	9.82809	8.4675	Q15019	TH216Y
Q9P2J5_76	9.8212	0	Q9P2J5	TH216Y
P40429_48	9.8209	11.1603	P40429	TH216Y
Q9Y6X8_122	9.81654	3.76306	Q9Y6X8	TH216Y
P12270_682	9.78617	1.56992	P12270	TH216Y
Q13547_237	9.76038	NA	Q13547	TH216Y
Q96F86_475	9.75054	0	Q96F86	TH216Y
Q9UBT2_84	9.68702	6.07335	Q9UBT2	TH216Y
P30086_81	9.67671	NA	P30086	TH216Y
Q92616_1643	9.66688	6.65495	Q92616	TH216Y
O43252_30	9.66402	7.28889	O43252	TH216Y
P53618_896	9.64724	3.56856	P53618	TH216Y
Q15437_707	9.63224	0.423648	Q15437	TH216Y
Q13547_201	9.60286	5.95062	Q13547	TH216Y
P06493_181	9.57353	NA	P06493	TH216Y
Q9NSE4_240	9.56678	12.502	Q9NSE4	TH216Y
P62910_95	9.55354	8.30939	P62910	TH216Y
Q04837_73	9.5445	1.63479	Q04837	TH216Y
O14654_743	9.5127	2.59418	O14654	TH216Y
P26639_298	9.49678	3.51927	P26639	TH216Y
P68363_357	9.48667	NA	P68363	TH216Y
P11802_17	9.45662	4.11616	P11802	TH216Y
O75533_1083	9.41622	1.44435	O75533	TH216Y
P07437_281	9.41037	6.61159	P07437	TH216Y
P51970_32	9.41006	10.2694	P51970	TH216Y
P31939_220	9.40898	1.54567	P31939	TH216Y
P61962_69	9.40477	4.17639	P61962	TH216Y
P32969_180	9.38389	2.935	P32969	TH216Y
P31948_444	9.37172	NA	P31948	TH216Y
P31948_310	9.3444	7.59158	P31948	TH216Y
P11142_545	9.34418	7.81066	P11142	TH216Y
P08243_398	9.33335	0.266517	P08243	TH216Y
P62917_133	9.28276	3.98431	P62917	TH216Y
O00231_415	9.2525	7.45741	O00231	TH216Y
P62241_117	9.23128	NA	P62241	TH216Y
P61088_76	9.22568	8.16792	P61088	TH216Y
Q8TB37_109	9.21647	NA	Q8TB37	TH216Y
Q15365_183	9.21173	4.70105	Q15365	TH216Y
P78527_3715	9.19901	NA	P78527	TH216Y
P0DN79_233	9.19785	NA	P0DN79	TH216Y
P22234_14	9.19286	3.15602	P22234	TH216Y
P11940_382	9.1721	6.3478	P11940	TH216Y
P11586_52	9.16376	NA	P11586	TH216Y
O75874_135	9.13331	5.49071	O75874	TH216Y
P33993_562	9.10738	4.32007	P33993	TH216Y
O00244_31	9.08984	7.01886	O00244	TH216Y
P43243_158	9.08856	3.32475	P43243	TH216Y
P61313_81	9.08627	6.5382	P61313	TH216Y
P08670_30	9.07352	0.359876	P08670	TH216Y
Q14204_2794	9.07257	4.26992	Q14204	TH216Y
Q9Y2Z0_95	9.07129	NA	Q9Y2Z0	TH216Y
P61758_57	9.05021	6.92892	P61758	TH216Y
O43765_114	9.04649	12.0521	O43765	TH216Y
P34932_435	9.0411	3.90171	P34932	TH216Y
P55060_861	9.01518	9.61586	P55060	TH216Y
Q9H857_457	9.01211	7.73245	Q9H857	TH216Y
P63279_68	9.00957	NA	P63279	TH216Y
Q96FW1_258	8.97646	0	Q96FW1	TH216Y
P22695_355	8.96428	0.282754	P22695	TH216Y
P45880_236	8.95651	4.80617	P45880	TH216Y
Q96I24_524	8.95213	NA	Q96I24	TH216Y
P09622_416	8.9403	5.84093	P09622	TH216Y
P62269_95	8.92668	NA	P62269	TH216Y
P46777_226	8.92268	0.132878	P46777	TH216Y
P52272_681	8.91939	9.0435	P52272	TH216Y
P11021_160	8.9175	1.26433	P11021	TH216Y
P42704_317	8.91435	4.92045	P42704	TH216Y
P10768_202	8.88519	2.15273	P10768	TH216Y
P06737_204	8.83874	8.83578	P06737	TH216Y
P49721_134	8.8121	NA	P49721	TH216Y
P61221_155	8.80309	7.50985	P61221	TH216Y
Q9UI10_186	8.79255	1.14	Q9UI10	TH216Y
P61163_241	8.77796	3.06412	P61163	TH216Y
P33993_539	8.74086	9.64425	P33993	TH216Y
O14818_153	8.67737	7.62026	O14818	TH216Y
Q8TAA3_161	8.67737	7.62026	Q8TAA3	TH216Y
Q9BWF3_345	8.66723	8.77099	Q9BWF3	TH216Y
Q9BZK7_456	8.65235	NA	Q9BZK7	TH216Y
P63010_121	8.60253	4.41912	P63010	TH216Y
Q10567_121	8.60253	4.41912	Q10567	TH216Y
Q9UBF2_565	8.6005	2.12221	Q9UBF2	TH216Y
P50570_231	8.59726	NA	P50570	TH216Y
P31946_130	8.58347	NA	P31946	TH216Y
Q02543_110	8.58147	1.58707	Q02543	TH216Y
Q13151_145	8.56159	NA	Q13151	TH216Y
O43837_366	8.56052	5.4137	O43837	TH216Y
P22314_60	8.54252	11.5296	P22314	TH216Y
P04792_54	8.53338	NA	P04792	TH216Y
P48556_235	8.51255	NA	P48556	TH216Y
Q14671_784	8.50421	6.78224	Q14671	TH216Y
Q8TB72_662	8.50421	6.78224	Q8TB72	TH216Y
P49792_903	8.49882	2.71146	P49792	TH216Y
O00429_273	8.47069	10.0261	O00429	TH216Y
Q96P16_117	8.45943	NA	Q96P16	TH216Y
P07437_340	8.42453	NA	P07437	TH216Y
Q9Y697_228	8.40323	NA	Q9Y697	TH216Y
Q00325_100	8.39111	6.7177	Q00325	TH216Y
P78527_3378	8.38601	NA	P78527	TH216Y
Q08J23_98	8.37459	NA	Q08J23	TH216Y
P48556_241	8.35304	8.0282	P48556	TH216Y
P11310_353	8.34153	1.7903	P11310	TH216Y
Q9UG63_487	8.32079	4.39268	Q9UG63	TH216Y
P78347_460	8.29353	NA	P78347	TH216Y
Q7L0Y3_307	8.29029	2.85458	Q7L0Y3	TH216Y
P13639_639	8.28448	0.739539	P13639	TH216Y
Q71U36_357	8.27924	6.08633	Q71U36	TH216Y
P53396_1006	8.25201	4.53094	P53396	TH216Y
Q12905_358	8.24731	5.20141	Q12905	TH216Y
P08243_555	8.21181	6.77754	P08243	TH216Y
Q9BZZ5_11	8.20061	3.85398	Q9BZZ5	TH216Y
P61964_191	8.19222	NA	P61964	TH216Y
P08708_20	8.18771	4.76112	P08708	TH216Y
Q13283_56	8.16043	NA	Q13283	TH216Y
P21127_681	8.144	4.07969	P21127	TH216Y
P26639_284	8.13758	NA	P26639	TH216Y
P54709_21	8.13738	0.134249	P54709	TH216Y
P67809_138	8.11077	4.54659	P67809	TH216Y
P46776_52	8.09331	4.19915	P46776	TH216Y
P08670_117	8.07793	NA	P08670	TH216Y
P52948_550	8.041	6.17414	P52948	TH216Y
P13995_234	8.01573	7.42729	P13995	TH216Y
P13639_443	8.00804	NA	P13639	TH216Y
Q9P258_420	7.99737	NA	Q9P258	TH216Y
Q00839_266	7.97526	4.50137	Q00839	TH216Y
Q9Y2L1_826	7.97171	0.81079	Q9Y2L1	TH216Y
Q13148_155	7.9609	NA	Q13148	TH216Y
P49207_34	7.94533	2.70844	P49207	TH216Y
Q96FW1_58	7.93078	NA	Q96FW1	TH216Y
Q05048_320	7.89998	0	Q05048	TH216Y
P55769_32	7.89297	3.91641	P55769	TH216Y
O00148_265	7.88642	4.46178	O00148	TH216Y
Q13838_266	7.88642	4.46178	Q13838	TH216Y
P50995_398	7.88193	NA	P50995	TH216Y
P30084_264	7.88128	2.34637	P30084	TH216Y
P49588_279	7.87922	2.48574	P49588	TH216Y
Q9UPN9_309	7.87468	NA	Q9UPN9	TH216Y
P53621_608	7.86733	NA	P53621	TH216Y
Q16778_41	7.86528	6.19159	Q16778	TH216Y
Q5UIP0_404	7.83881	3.54835	Q5UIP0	TH216Y
Q99459_100	7.83483	7.66679	Q99459	TH216Y
P31943_180	7.81968	7.73267	P31943	TH216Y
P08865_156	7.79982	3.55975	P08865	TH216Y
P12004_211	7.74976	1.39369	P12004	TH216Y
O14654_111	7.74931	5.24587	O14654	TH216Y
P60709_218	7.74607	NA	P60709	TH216Y
P07195_173	7.74071	NA	P07195	TH216Y
Q07020_166	7.73999	2.44242	Q07020	TH216Y
P31153_242	7.72606	3.80817	P31153	TH216Y
Q15365_341	7.7243	4.37481	Q15365	TH216Y
P10412_71	7.70606	NA	P10412	TH216Y
P68104_357	7.69734	1.18962	P68104	TH216Y
P11310_400	7.69268	1.42651	P11310	TH216Y
P25205_251	7.68069	1.96543	P25205	TH216Y
Q96RN5_542	7.67369	NA	Q96RN5	TH216Y
P43034_367	7.653	NA	P43034	TH216Y
P04406_94	7.62263	NA	P04406	TH216Y
Q9UNM6_162	7.61665	1.85881	Q9UNM6	TH216Y
P23743_477	7.58805	6.42377	P23743	TH216Y
P22314_471	7.57888	10.1239	P22314	TH216Y
Q9H7S9_545	7.57497	3.14072	Q9H7S9	TH216Y
Q04726_772	7.57267	NA	Q04726	TH216Y
Q9BQP7_205	7.55265	7.35903	Q9BQP7	TH216Y
P62847_97	7.51074	3.33559	P62847	TH216Y
P20618_135	7.51019	2.14082	P20618	TH216Y
P23743_544	7.49834	6.52471	P23743	TH216Y
P14618_83	7.49257	7.29388	P14618	TH216Y
P15880_266	7.48117	5.58718	P15880	TH216Y
Q14204_2792	7.45427	1.08544	Q14204	TH216Y
Q16181_163	7.41182	NA	Q16181	TH216Y
P61978_72	7.40412	2.82174	P61978	TH216Y
Q29RF7_1121	7.39748	2.55964	Q29RF7	TH216Y
P21796_173	7.38493	3.0423	P21796	TH216Y
P23743_399	7.36009	7.45348	P23743	TH216Y
P62906_41	7.29468	NA	P62906	TH216Y
Q96I24_523	7.29003	NA	Q96I24	TH216Y
Q00839_260	7.28318	7.02182	Q00839	TH216Y
A0AVT1_663	7.27987	NA	A0AVT1	TH216Y
P78527_4077	7.27482	7.25846	P78527	TH216Y
P04350_51	7.25183	1.2605	P04350	TH216Y
Q16576_20	7.24837	NA	Q16576	TH216Y
Q08J23_52	7.21962	1.96337	Q08J23	TH216Y
Q9UHD8_560	7.20983	NA	Q9UHD8	TH216Y
Q9BU89_211	7.18339	7.35043	Q9BU89	TH216Y
Q9GZN1_56	7.15454	0	Q9GZN1	TH216Y
P30153_261	7.13922	NA	P30153	TH216Y
Q9H9Q2_198	7.11719	NA	Q9H9Q2	TH216Y
Q14204_2426	7.1005	NA	Q14204	TH216Y
P62241_113	7.0973	7.79681	P62241	TH216Y
P43246_121	7.08078	9.10769	P43246	TH216Y
O43684_42	7.06748	0	O43684	TH216Y
Q13526_23	7.06343	6.73587	Q13526	TH216Y
P18621_4	7.06184	1.52197	P18621	TH216Y
O75844_253	7.02693	4.12107	O75844	TH216Y
Q13347_300	7.01323	9.87672	Q13347	TH216Y
P38606_579	7.00428	NA	P38606	TH216Y
Q9Y3Z3_521	7.00342	NA	Q9Y3Z3	TH216Y
P35580_22	6.98352	1.85434	P35580	TH216Y
P23743_102	6.957	NA	P23743	TH216Y
Q9Y5A7_239	6.94661	NA	Q9Y5A7	TH216Y
P00374_163	6.93994	5.17116	P00374	TH216Y
P36542_77	6.93587	9.52076	P36542	TH216Y
P14866_430	6.9324	NA	P14866	TH216Y
Q13283_40	6.92889	3.73312	Q13283	TH216Y
P17812_106	6.91707	1.41343	P17812	TH216Y
P61081_86	6.90382	0.467529	P61081	TH216Y
O00483_65	6.90275	0.536599	O00483	TH216Y
P62826_155	6.89531	5.22904	P62826	TH216Y
P14625_575	6.89142	6.56847	P14625	TH216Y
P08670_61	6.88477	2.01471	P08670	TH216Y
P61289_175	6.86455	1.19334	P61289	TH216Y
P19338_525	6.83654	NA	P19338	TH216Y
P13674_389	6.83578	NA	P13674	TH216Y
P31948_376	6.83149	2.90955	P31948	TH216Y
Q9UMX5_88	6.82958	5.11335	Q9UMX5	TH216Y
Q9Y2Z0_283	6.82668	0.223968	Q9Y2Z0	TH216Y
P63244_246	6.82392	NA	P63244	TH216Y
P07900_216	6.82355	4.94302	P07900	TH216Y
Q13263_755	6.82353	NA	Q13263	TH216Y
Q12931_331	6.81635	NA	Q12931	TH216Y
P08670_53	6.79133	2.34187	P08670	TH216Y
P38606_525	6.72612	1.95583	P38606	TH216Y
Q00325_196	6.71657	NA	Q00325	TH216Y
P40926_80	6.71122	2.74628	P40926	TH216Y
Q9P2J5_156	6.70756	6.66855	Q9P2J5	TH216Y
P49327_2439	6.69394	3.99258	P49327	TH216Y
P27348_128	6.64381	0.157359	P27348	TH216Y
P11216_197	6.61239	NA	P11216	TH216Y
Q04837_101	6.58954	3.88147	Q04837	TH216Y
Q16740_73	6.52643	1.39175	Q16740	TH216Y
P31946_213	6.51055	3.59798	P31946	TH216Y
Q9Y2Z0_90	6.50345	NA	Q9Y2Z0	TH216Y
P23258_86	6.46104	NA	P23258	TH216Y
P61163_38	6.44903	2.37069	P61163	TH216Y
P23743_50	6.426	6.64385	P23743	TH216Y
P13639_787	6.42305	2.60111	P13639	TH216Y
O94925_304	6.41758	4.71965	O94925	TH216Y
P68032_71	6.41571	NA	P68032	TH216Y
Q9HCC0_413	6.40949	5.32198	Q9HCC0	TH216Y
P09543_100	6.39515	7.22065	P09543	TH216Y
Q9H2P0_764	6.38548	NA	Q9H2P0	TH216Y
P62899_25	6.35787	6.40505	P62899	TH216Y
P78527_2440	6.34645	NA	P78527	TH216Y
P04181_116	6.33317	4.36913	P04181	TH216Y
P50570_125	6.32813	NA	P50570	TH216Y
Q09028_132	6.32739	NA	Q09028	TH216Y
P49458_18	6.32171	NA	P49458	TH216Y
Q08J23_38	6.31956	NA	Q08J23	TH216Y
Q12800_497	6.31814	NA	Q12800	TH216Y
P78527_103	6.29574	0	P78527	TH216Y
P23526_165	6.29404	8.00951	P23526	TH216Y
Q9Y678_565	6.28689	7.33529	Q9Y678	TH216Y
P49327_1506	6.28651	0	P49327	TH216Y
Q8IWX8_897	6.28368	3.82777	Q8IWX8	TH216Y
P25787_57	6.27494	6.9965	P25787	TH216Y
P78527_265	6.2601	0.0705524	P78527	TH216Y
Q02790_220	6.25559	4.59723	Q02790	TH216Y
P52597_236	6.24132	NA	P52597	TH216Y
O43684_207	6.21852	NA	O43684	TH216Y
P62910_60	6.20733	4.37154	P62910	TH216Y
P06744_144	6.20006	1.68016	P06744	TH216Y
P78527_2965	6.17264	0	P78527	TH216Y
Q5JTH9_779	6.1404	5.24565	Q5JTH9	TH216Y
P14868_402	6.13687	NA	P14868	TH216Y
P62266_27	6.13335	6.19539	P62266	TH216Y
O75533_1049	6.12402	7.19279	O75533	TH216Y
Q15019_105	6.11532	7.87105	Q15019	TH216Y
Q14684_34	6.10458	1.48754	Q14684	TH216Y
P53618_521	6.10352	7.32879	P53618	TH216Y
P40429_112	6.096	3.6669	P40429	TH216Y
P46459_502	6.09338	NA	P46459	TH216Y
Q92947_113	6.09139	0.460929	Q92947	TH216Y
P08243_374	6.08068	NA	P08243	TH216Y
P08243_204	6.06125	0.372156	P08243	TH216Y
Q15019_296	6.05774	NA	Q15019	TH216Y
P11177_63	6.05736	9.18378	P11177	TH216Y
P49368_274	6.04981	NA	P49368	TH216Y
P30876_1047	6.02893	3.93538	P30876	TH216Y
P37802_8	6.02587	1.87586	P37802	TH216Y
P35579_573	6.01535	1.14185	P35579	TH216Y
P35606_193	6.0129	NA	P35606	TH216Y
P36776_394	6.01072	0.54922	P36776	TH216Y
P22234_22	6.00253	4.36436	P22234	TH216Y
P0DMV8_431	5.98354	0.999478	P0DMV8	TH216Y
Q9UMS4_207	5.93236	NA	Q9UMS4	TH216Y
Q9BU76_30	5.92465	NA	Q9BU76	TH216Y
P38606_374	5.9134	1.00974	P38606	TH216Y
P11142_525	5.90374	5.81652	P11142	TH216Y
P23921_726	5.86064	5.40198	P23921	TH216Y
O14802_42	5.85778	NA	O14802	TH216Y
P23246_527	5.85625	NA	P23246	TH216Y
Q00839_802	5.84056	8.9864	Q00839	TH216Y
P11586_816	5.82291	NA	P11586	TH216Y
P43243_128	5.82053	10.2661	P43243	TH216Y
Q09161_64	5.81983	NA	Q09161	TH216Y
Q09028_181	5.81485	NA	Q09028	TH216Y
P13797_450	5.80372	8.19623	P13797	TH216Y
P23258_82	5.7951	3.71904	P23258	TH216Y
Q9Y3F4_300	5.79262	1.78642	Q9Y3F4	TH216Y
P49368_303	5.79145	6.66396	P49368	TH216Y
P33993_492	5.78804	3.73124	P33993	TH216Y
O75347_94	5.78168	0.490963	O75347	TH216Y
P78527_2004	5.76473	NA	P78527	TH216Y
O60271_578	5.7455	1.65291	O60271	TH216Y
O95983_52	5.73348	NA	O95983	TH216Y
Q2NL82_770	5.73018	NA	Q2NL82	TH216Y
P22234_119	5.71789	NA	P22234	TH216Y
P46776_48	5.69134	2.22849	P46776	TH216Y
P40925_210	5.66466	3.95762	P40925	TH216Y
O43684_53	5.66437	NA	O43684	TH216Y
Q16576_131	5.64782	NA	Q16576	TH216Y
P05091_442	5.64418	7.19287	P05091	TH216Y
Q9Y285_292	5.64114	NA	Q9Y285	TH216Y
Q9BZK7_446	5.62563	NA	Q9BZK7	TH216Y
O75533_928	5.62388	6.55566	O75533	TH216Y
P38646_196	5.62319	NA	P38646	TH216Y
P62701_103	5.6151	0.184202	P62701	TH216Y
P12268_233	5.59963	2.84712	P12268	TH216Y
Q9UI30_74	5.5881	4.96137	Q9UI30	TH216Y
Q92616_1205	5.58125	0.495007	Q92616	TH216Y
O14773_508	5.56741	1.491	O14773	TH216Y
Q12931_498	5.5544	5.58671	Q12931	TH216Y
Q9BPW8_116	5.49266	NA	Q9BPW8	TH216Y
P07910_137	5.46532	0.318723	P07910	TH216Y
P07954_67	5.46122	1.38914	P07954	TH216Y
P38646_128	5.45322	0.436987	P38646	TH216Y
P14618_390	5.41794	3.3246	P14618	TH216Y
P07237_414	5.41292	0.657544	P07237	TH216Y
Q14247_104	5.38815	0.827019	Q14247	TH216Y
Q09028_32	5.37526	NA	Q09028	TH216Y
O14802_136	5.35205	NA	O14802	TH216Y
Q13555_517	5.32083	2.95095	Q13555	TH216Y
P62750_144	5.32069	2.00689	P62750	TH216Y
Q14247_162	5.29525	0.26372	Q14247	TH216Y
Q15019_63	5.26922	4.09989	Q15019	TH216Y
P13861_385	5.26247	NA	P13861	TH216Y
P78527_3334	5.26216	0	P78527	TH216Y
Q00610_1211	5.25239	1.01215	Q00610	TH216Y
Q9BQE3_282	5.24974	8.8352	Q9BQE3	TH216Y
Q8WUM4_258	5.23214	NA	Q8WUM4	TH216Y
P31943_195	5.22103	4.65958	P31943	TH216Y
Q92947_123	5.21922	2.58355	Q92947	TH216Y
Q9BPW8_185	5.1945	NA	Q9BPW8	TH216Y
O96000_26	5.19389	NA	O96000	TH216Y
P58004_342	5.17978	NA	P58004	TH216Y
Q00839_466	5.12792	NA	Q00839	TH216Y
Q08J23_537	5.12247	NA	Q08J23	TH216Y
Q99541_217	5.11213	NA	Q99541	TH216Y
Q96JB2_162	5.09471	9.10997	Q96JB2	TH216Y
Q9Y2X9_671	5.08759	2.21755	Q9Y2X9	TH216Y
A5YKK6_379	5.07795	0.728367	A5YKK6	TH216Y
P62805_73	5.06981	4.39529	P62805	TH216Y
Q14566_575	5.0529	0.746427	Q14566	TH216Y
P31153_296	5.05088	NA	P31153	TH216Y
P50570_265	5.0502	NA	P50570	TH216Y
O94776_437	5.02295	1.96975	O94776	TH216Y
Q9NSE4_975	5.01231	2.964	Q9NSE4	TH216Y
O14979_295	5.01015	1.5296	O14979	TH216Y
Q99986_213	4.99518	0	Q99986	TH216Y
P09874_645	4.99478	5.56446	P09874	TH216Y
P53680_20	4.95758	NA	P53680	TH216Y
Q9BZX2_112	4.9481	NA	Q9BZX2	TH216Y
Q9UBT2_265	4.93384	1.18885	Q9UBT2	TH216Y
P40763_176	4.92371	0.94722	P40763	TH216Y
Q16658_69	4.92219	NA	Q16658	TH216Y
P23396_87	4.89584	5.30387	P23396	TH216Y
Q6NXE6_137	4.89566	2.21012	Q6NXE6	TH216Y
P22314_666	4.89069	0.823463	P22314	TH216Y
P38606_386	4.87974	NA	P38606	TH216Y
Q99543_274	4.85108	3.61604	Q99543	TH216Y
P26599_127	4.84259	2.6795	P26599	TH216Y
P61313_59	4.83931	2.44308	P61313	TH216Y
Q9BYG5_172	4.80106	3.69063	Q9BYG5	TH216Y
Q8NHW5_13	4.7997	1.00008	Q8NHW5	TH216Y
P31930_219	4.79924	2.36518	P31930	TH216Y
P53999_88	4.79867	NA	P53999	TH216Y
P07237_63	4.78281	0.344301	P07237	TH216Y
P50502_185	4.77828	1.27088	P50502	TH216Y
Q13885_59	4.77392	2.66619	Q13885	TH216Y
Q14204_3051	4.75835	6.64594	Q14204	TH216Y
P62829_38	4.75595	8.38944	P62829	TH216Y
P40926_287	4.73859	1.58942	P40926	TH216Y
O75390_345	4.7367	4.63184	O75390	TH216Y
Q02878_282	4.73245	3.5442	Q02878	TH216Y
Q9NRX4_91	4.71902	4.20499	Q9NRX4	TH216Y
P07900_434	4.71711	NA	P07900	TH216Y
P62805_89	4.70829	NA	P62805	TH216Y
P78527_3442	4.69837	0	P78527	TH216Y
P62249_99	4.6928	6.6247	P62249	TH216Y
P62258_131	4.69097	0.745393	P62258	TH216Y
P53396_704	4.67552	4.82871	P53396	TH216Y
Q8N163_100	4.66878	NA	Q8N163	TH216Y
Q12931_106	4.66001	0.233005	Q12931	TH216Y
O60884_35	4.65465	2.84962	O60884	TH216Y
P35606_216	4.64789	NA	P35606	TH216Y
P53396_247	4.6341	3.1593	P53396	TH216Y
O15260_24	4.62582	0.713685	O15260	TH216Y
P11177_67	4.61676	4.91953	P11177	TH216Y
P22695_182	4.60614	2.20216	P22695	TH216Y
Q29RF7_1076	4.56199	NA	Q29RF7	TH216Y
P55209_96	4.55823	4.76122	P55209	TH216Y
P49591_267	4.54851	5.11192	P49591	TH216Y
Q9BV86_103	4.53792	4.56704	Q9BV86	TH216Y
P0DN79_223	4.53388	NA	P0DN79	TH216Y
P61981_154	4.52514	3.68071	P61981	TH216Y
P22102_344	4.50173	7.55032	P22102	TH216Y
Q9BTW9_663	4.49668	NA	Q9BTW9	TH216Y
P06280_123	4.49527	2.00188	P06280	TH216Y
P18754_358	4.48964	0.536905	P18754	TH216Y
Q9NTI5_1083	4.46584	NA	Q9NTI5	TH216Y
P53621_955	4.44871	NA	P53621	TH216Y
Q13200_400	4.44637	1.35904	Q13200	TH216Y
Q09161_202	4.44432	NA	Q09161	TH216Y
P34932_671	4.41458	0.108236	P34932	TH216Y
P35606_194	4.40781	NA	P35606	TH216Y
Q9BVA1_59	4.39135	9.41727	Q9BVA1	TH216Y
P78527_3828	4.38225	8.51752	P78527	TH216Y
Q9Y3Z3_154	4.37941	NA	Q9Y3Z3	TH216Y
Q9UBT2_526	4.37326	NA	Q9UBT2	TH216Y
P78527_959	4.37306	4.33443	P78527	TH216Y
P38646_181	4.35861	0.281299	P38646	TH216Y
P62277_38	4.35287	3.16131	P62277	TH216Y
P23528_117	4.34725	5.92974	P23528	TH216Y
Q5JRX3_906	4.34037	4.03645	Q5JRX3	TH216Y
O00442_226	4.33744	2.15789	O00442	TH216Y
P23258_366	4.3346	2.40553	P23258	TH216Y
Q9NRH3_366	4.3346	2.40553	Q9NRH3	TH216Y
P00338_145	4.32561	NA	P00338	TH216Y
Q9C0E8_262	4.32159	1.63318	Q9C0E8	TH216Y
P26640_304	4.32127	NA	P26640	TH216Y
P07814_1504	4.30906	0	P07814	TH216Y
P34897_105	4.3014	4.91235	P34897	TH216Y
P40939_343	4.29934	1.80101	P40939	TH216Y
P12268_430	4.29865	1.97077	P12268	TH216Y
O00541_44	4.28718	0.755122	O00541	TH216Y
P78527_3013	4.28019	NA	P78527	TH216Y
Q969G3_142	4.24135	4.03587	Q969G3	TH216Y
P10398_155	4.23843	5.7231	P10398	TH216Y
P38646_118	4.20132	0.893584	P38646	TH216Y
O95163_939	4.20091	2.55008	O95163	TH216Y
Q9HAV7_102	4.19931	NA	Q9HAV7	TH216Y
Q9UBQ5_21	4.19582	1.56597	Q9UBQ5	TH216Y
P60174_105	4.18817	1.60366	P60174	TH216Y
P26640_24	4.18406	9.28436	P26640	TH216Y
O15217_9	4.17109	0.962916	O15217	TH216Y
Q99755_77	4.16846	1.94835	Q99755	TH216Y
P29401_137	4.16696	2.02909	P29401	TH216Y
P56192_549	4.15883	3.79264	P56192	TH216Y
P50395_212	4.15429	0.649613	P50395	TH216Y
Q6PD62_548	4.13847	NA	Q6PD62	TH216Y
P78527_3855	4.11585	NA	P78527	TH216Y
P30101_67	4.10641	0.498498	P30101	TH216Y
P41252_94	4.09773	3.07499	P41252	TH216Y
Q5UIP0_712	4.09651	NA	Q5UIP0	TH216Y
Q92616_1526	4.08522	2.48887	Q92616	TH216Y
P33991_730	4.07725	2.58775	P33991	TH216Y
O95881_137	4.06663	2.48768	O95881	TH216Y
P61163_92	4.06484	1.12357	P61163	TH216Y
P07900_438	4.05643	4.06372	P07900	TH216Y
O14744_324	4.05483	0	O14744	TH216Y
Q92567_94	4.02367	1.77121	Q92567	TH216Y
Q7L0Y3_244	4.01339	NA	Q7L0Y3	TH216Y
Q9Y4L1_487	4.00797	NA	Q9Y4L1	TH216Y
O14733_105	3.99781	5.05967	O14733	TH216Y
Q06830_116	3.96429	1.14795	Q06830	TH216Y
P62241_188	3.91843	6.67059	P62241	TH216Y
O60502_729	3.91476	2.60132	O60502	TH216Y
Q9BWF3_58	3.90908	9.61404	Q9BWF3	TH216Y
Q29RF7_680	3.90735	NA	Q29RF7	TH216Y
P85037_266	3.88683	1.10689	P85037	TH216Y
O76003_296	3.85033	2.61842	O76003	TH216Y
O75439_142	3.84969	3.0648	O75439	TH216Y
P38606_465	3.82494	NA	P38606	TH216Y
P34897_176	3.80626	7.21714	P34897	TH216Y
Q9NR45_81	3.8008	0.473608	Q9NR45	TH216Y
Q13347_173	3.78914	2.92477	Q13347	TH216Y
P11310_73	3.76746	1.0728	P11310	TH216Y
P09874_775	3.76534	NA	P09874	TH216Y
O60637_140	3.76523	4.2968	O60637	TH216Y
Q8IWS0_313	3.75544	NA	Q8IWS0	TH216Y
O43172_162	3.75221	NA	O43172	TH216Y
P09429_109	3.73942	NA	P09429	TH216Y
P78559_41	3.71556	1.33365	P78559	TH216Y
Q9H857_110	3.71093	2.31703	Q9H857	TH216Y
Q96PK6_237	3.68029	1.40018	Q96PK6	TH216Y
Q13347_308	3.67842	8.48521	Q13347	TH216Y
Q6YN16_229	3.67679	NA	Q6YN16	TH216Y
P21912_273	3.67541	0.391139	P21912	TH216Y
P62826_147	3.66224	0.716357	P62826	TH216Y
Q9UBT2_191	3.65392	NA	Q9UBT2	TH216Y
Q13330_472	3.62835	NA	Q13330	TH216Y
Q5VYK3_1469	3.62638	0.00621568	Q5VYK3	TH216Y
Q9Y2Z0_277	3.62413	1.81893	Q9Y2Z0	TH216Y
P14625_527	3.59369	1.31482	P14625	TH216Y
P33992_403	3.57997	2.55616	P33992	TH216Y
Q15691_71	3.56521	0.529635	Q15691	TH216Y
P24752_331	3.55223	NA	P24752	TH216Y
P61163_33	3.5392	3.71912	P61163	TH216Y
Q9UBT2_159	3.53293	NA	Q9UBT2	TH216Y
O14802_721	3.5303	NA	O14802	TH216Y
Q99797_628	3.5091	1.54641	Q99797	TH216Y
Q13263_517	3.48936	3.8849	Q13263	TH216Y
P28074_236	3.47443	3.47611	P28074	TH216Y
Q8IWS0_103	3.4739	NA	Q8IWS0	TH216Y
P07737_60	3.47363	3.43785	P07737	TH216Y
P07195_248	3.47255	NA	P07195	TH216Y
Q9Y237_71	3.44437	0.146068	Q9Y237	TH216Y
Q9UI10_214	3.44358	1.58937	Q9UI10	TH216Y
P14618_370	3.43536	1.15862	P14618	TH216Y
P30153_155	3.42157	NA	P30153	TH216Y
Q00610_883	3.41921	0.311096	Q00610	TH216Y
Q9BPW8_87	3.41821	NA	Q9BPW8	TH216Y
Q8TEX9_460	3.41052	NA	Q8TEX9	TH216Y
O14776_547	3.40994	NA	O14776	TH216Y
P11940_291	3.40426	6.55813	P11940	TH216Y
P30101_95	3.40147	1.23206	P30101	TH216Y
P31948_236	3.38414	1.34542	P31948	TH216Y
P08243_185	3.37936	1.16066	P08243	TH216Y
Q4VCS5_599	3.36932	0.239807	Q4VCS5	TH216Y
Q00688_198	3.35967	9.881	Q00688	TH216Y
P51553_142	3.35828	NA	P51553	TH216Y
Q99707_164	3.35713	NA	Q99707	TH216Y
Q08211_1155	3.32009	1.3853	Q08211	TH216Y
P30876_1020	3.31817	1.08194	P30876	TH216Y
P49916_438	3.3163	1.52048	P49916	TH216Y
P06493_19	3.31614	2.24992	P06493	TH216Y
P08865_204	3.31578	NA	P08865	TH216Y
Q9BZI7_98	3.31296	1.07844	Q9BZI7	TH216Y
Q9NR50_231	3.29596	5.91568	Q9NR50	TH216Y
Q9NRX4_57	3.29389	0.629883	Q9NRX4	TH216Y
P60842_126	3.28552	0	P60842	TH216Y
O43847_985	3.28043	0.680168	O43847	TH216Y
P12270_735	3.26693	NA	P12270	TH216Y
P30837_220	3.25775	0.368834	P30837	TH216Y
Q9BVA1_50	3.2537	1.69789	Q9BVA1	TH216Y
Q96S55_239	3.24344	0.612782	Q96S55	TH216Y
Q9HCC0_177	3.24327	NA	Q9HCC0	TH216Y
P62841_30	3.23994	NA	P62841	TH216Y
P17987_299	3.23864	0.53768	P17987	TH216Y
P04406_42	3.21001	NA	P04406	TH216Y
Q16181_30	3.20436	2.59273	Q16181	TH216Y
Q9H7E9_186	3.18952	NA	Q9H7E9	TH216Y
Q14204_2350	3.18697	NA	Q14204	TH216Y
Q16543_278	3.18118	1.9245	Q16543	TH216Y
P07195_282	3.17097	NA	P07195	TH216Y
P17844_76	3.16489	3.92153	P17844	TH216Y
P35251_1075	3.13961	NA	P35251	TH216Y
O75298_350	3.13618	0.90336	O75298	TH216Y
Q00169_140	3.13056	NA	Q00169	TH216Y
P43490_108	3.12939	NA	P43490	TH216Y
P29692_182	3.10825	NA	P29692	TH216Y
O43913_236	3.1049	NA	O43913	TH216Y
P24928_699	3.09445	NA	P24928	TH216Y
P63244_140	3.08707	NA	P63244	TH216Y
Q15233_267	3.08552	9.99089	Q15233	TH216Y
Q13557_231	3.0851	NA	Q13557	TH216Y
P63104_118	3.08268	NA	P63104	TH216Y
Q16181_41	3.07271	NA	Q16181	TH216Y
P28074_228	3.07204	0.263284	P28074	TH216Y
P55769_11	3.06248	1.33463	P55769	TH216Y
Q9UJX2_460	3.05983	NA	Q9UJX2	TH216Y
Q9UFN0_42	3.0553	NA	Q9UFN0	TH216Y
P25786_24	3.01939	1.65127	P25786	TH216Y
Q92797_685	3.01313	NA	Q92797	TH216Y
Q04837_109	2.99406	0.319066	Q04837	TH216Y
P43243_202	2.99002	NA	P43243	TH216Y
P08238_216	2.98927	NA	P08238	TH216Y
P68371_51	2.98386	9.12425	P68371	TH216Y
Q12996_546	2.98018	2.49803	Q12996	TH216Y
Q14980_1836	2.95972	NA	Q14980	TH216Y
P30876_1048	2.93631	NA	P30876	TH216Y
Q9BZJ0_223	2.93492	0.799346	Q9BZJ0	TH216Y
Q9BRA2_99	2.9099	2.13634	Q9BRA2	TH216Y
P31939_192	2.90566	1.17343	P31939	TH216Y
Q92616_1312	2.90146	8.79521	Q92616	TH216Y
O00567_284	2.88531	0.330391	O00567	TH216Y
P62191_25	2.88529	0.560598	P62191	TH216Y
Q99986_302	2.88508	2.99271	Q99986	TH216Y
P13804_84	2.88198	1.85524	P13804	TH216Y
P52701_1298	2.88157	1.14031	P52701	TH216Y
P08559_82	2.88043	0.364508	P08559	TH216Y
P52701_538	2.87056	NA	P52701	TH216Y
P27797_285	2.86352	0.995041	P27797	TH216Y
P07195_240	2.85867	NA	P07195	TH216Y
P49588_258	2.83369	NA	P49588	TH216Y
Q9Y265_438	2.8325	NA	Q9Y265	TH216Y
P14618_148	2.83003	1.46551	P14618	TH216Y
P49589_244	2.81871	NA	P49589	TH216Y
P33993_6	2.81725	1.04014	P33993	TH216Y
P63167_50	2.81594	0.123323	P63167	TH216Y
Q96FJ2_50	2.81594	0.123323	Q96FJ2	TH216Y
P43686_239	2.81577	2.60542	P43686	TH216Y
P29401_447	2.81537	1.38192	P29401	TH216Y
Q9C0J8_59	2.79707	0.0349447	Q9C0J8	TH216Y
P49327_1047	2.7832	0.241453	P49327	TH216Y
Q96ST2_762	2.75935	0.963905	Q96ST2	TH216Y
P78527_1988	2.74343	3.77785	P78527	TH216Y
P78527_3280	2.74195	NA	P78527	TH216Y
P21108_94	2.72638	NA	P21108	TH216Y
P62805_52	2.7252	0	P62805	TH216Y
P62753_28	2.72443	1.27837	P62753	TH216Y
P24752_407	2.72389	NA	P24752	TH216Y
P07814_1028	2.71128	NA	P07814	TH216Y
O75475_420	2.70961	NA	O75475	TH216Y
P36578_122	2.70777	2.762	P36578	TH216Y
Q86UE8_641	2.70412	NA	Q86UE8	TH216Y
P17987_426	2.69825	0	P17987	TH216Y
Q9BUF5_51	2.69566	0.279427	Q9BUF5	TH216Y
Q99707_876	2.68085	2.36373	Q99707	TH216Y
Q15181_193	2.66216	2.50767	Q15181	TH216Y
P13639_397	2.6536	4.61665	P13639	TH216Y
O75934_87	2.65062	NA	O75934	TH216Y
Q9NTI5_318	2.63293	NA	Q9NTI5	TH216Y
P13804_149	2.6322	0.428403	P13804	TH216Y
Q9BXW7_129	2.62462	0.791878	Q9BXW7	TH216Y
P61313_62	2.62402	0.132894	P61313	TH216Y
Q9BU76_51	2.62205	NA	Q9BU76	TH216Y
P35659_142	2.61333	2.04198	P35659	TH216Y
O14744_116	2.61232	NA	O14744	TH216Y
P78527_3839	2.61171	NA	P78527	TH216Y
P29401_481	2.59981	0	P29401	TH216Y
Q07020_24	2.59124	1.57611	Q07020	TH216Y
P60842_175	2.58713	1.17352	P60842	TH216Y
P40429_54	2.5845	0.88089	P40429	TH216Y
P30153_495	2.58052	NA	P30153	TH216Y
Q8IYI6_79	2.57449	NA	Q8IYI6	TH216Y
P33993_88	2.5711	NA	P33993	TH216Y
Q92922_606	2.56156	0.304378	Q92922	TH216Y
Q08J23_51	2.55629	1.71229	Q08J23	TH216Y
Q15393_1166	2.54094	0	Q15393	TH216Y
P11586_834	2.5327	6.47635	P11586	TH216Y
Q02790_245	2.51983	NA	Q02790	TH216Y
O15235_130	2.51593	0.211402	O15235	TH216Y
Q6NXE6_113	2.499	NA	Q6NXE6	TH216Y
P55060_487	2.4936	NA	P55060	TH216Y
Q9NSE4_465	2.49326	0.901328	Q9NSE4	TH216Y
P52888_422	2.48515	NA	P52888	TH216Y
Q16204_80	2.46206	NA	Q16204	TH216Y
P78527_3036	2.46093	NA	P78527	TH216Y
P78527_3040	2.44632	NA	P78527	TH216Y
P35251_830	2.43671	NA	P35251	TH216Y
P08559_156	2.42345	0.628758	P08559	TH216Y
Q9ULV4_394	2.41609	10.1595	Q9ULV4	TH216Y
O43684_194	2.40482	2.07084	O43684	TH216Y
Q9Y3Z3_155	2.38597	NA	Q9Y3Z3	TH216Y
Q14204_2901	2.38594	NA	Q14204	TH216Y
P24928_1308	2.38031	NA	P24928	TH216Y
Q9UBT2_249	2.3788	NA	Q9UBT2	TH216Y
Q16576_31	2.37617	3.09444	Q16576	TH216Y
Q92616_2001	2.36724	0.716258	Q92616	TH216Y
P62241_27	2.35501	10.3368	P62241	TH216Y
P15121_190	2.35019	0.450674	P15121	TH216Y
P13797_588	2.3417	NA	P13797	TH216Y
P39748_268	2.329	NA	P39748	TH216Y
Q9NRX4_97	2.32719	1.05836	Q9NRX4	TH216Y
P62993_209	2.31401	2.85662	P62993	TH216Y
P54886_653	2.31146	NA	P54886	TH216Y
O00567_408	2.3022	1.43708	O00567	TH216Y
Q00341_241	2.3015	0.220314	Q00341	TH216Y
Q9Y5J3_161	2.30032	0.816615	Q9Y5J3	TH216Y
Q99541_354	2.29849	NA	Q99541	TH216Y
Q13509_222	2.28993	NA	Q13509	TH216Y
P78371_213	2.28793	NA	P78371	TH216Y
P61163_363	2.28229	10.5464	P61163	TH216Y
Q9NSE4_691	2.27538	NA	Q9NSE4	TH216Y
O95758_130	2.27217	NA	O95758	TH216Y
Q9Y697_95	2.26966	NA	Q9Y697	TH216Y
P23919_151	2.24672	0.57742	P23919	TH216Y
P43034_290	2.238	NA	P43034	TH216Y
P49721_67	2.23481	NA	P49721	TH216Y
Q9NVI1_885	2.23085	NA	Q9NVI1	TH216Y
Q14257_30	2.21811	NA	Q14257	TH216Y
P52597_82	2.21153	0.130038	P52597	TH216Y
P61978_236	2.20561	NA	P61978	TH216Y
Q9NQC3_1076	2.20473	0.721935	Q9NQC3	TH216Y
Q9BUF5_36	2.2014	NA	Q9BUF5	TH216Y
Q13148_77	2.19984	NA	Q13148	TH216Y
O14654_847	2.1996	0.366349	O14654	TH216Y
Q08J23_609	2.19704	3.98681	Q08J23	TH216Y
Q9P2J5_275	2.19133	0	Q9P2J5	TH216Y
Q13283_125	2.18894	NA	Q13283	TH216Y
Q08J23_222	2.18874	NA	Q08J23	TH216Y
Q9BZX2_203	2.1861	NA	Q9BZX2	TH216Y
P62851_55	2.18153	5.36336	P62851	TH216Y
P24752_219	2.163	1.19823	P24752	TH216Y
Q16181_319	2.15914	0.652782	Q16181	TH216Y
O75153_346	2.15613	0.411727	O75153	TH216Y
O43684_235	2.15512	NA	O43684	TH216Y
P22102_269	2.15315	0	P22102	TH216Y
Q9UQ80_309	2.14552	1.20806	Q9UQ80	TH216Y
Q8N8N7_265	2.13228	10.333	Q8N8N7	TH216Y
P04080_85	2.11997	1.24204	P04080	TH216Y
Q08J23_612	2.11086	1.00204	Q08J23	TH216Y
P14866_267	2.10583	0.306485	P14866	TH216Y
Q9NXF7_201	2.10017	NA	Q9NXF7	TH216Y
Q96PU8_17	2.08734	0.267295	Q96PU8	TH216Y
Q15436_705	2.08312	0.259948	Q15436	TH216Y
P48643_137	2.07034	0	P48643	TH216Y
P21127_665	2.05796	0.850464	P21127	TH216Y
P06737_732	2.04873	NA	P06737	TH216Y
Q9BTW9_272	2.04287	NA	Q9BTW9	TH216Y
P61758_180	2.0362	0.437697	P61758	TH216Y
Q9Y230_362	2.03403	NA	Q9Y230	TH216Y
P23258_161	2.03183	NA	P23258	TH216Y
Q9NRZ9_350	2.01909	NA	Q9NRZ9	TH216Y
P49792_11	2.01897	0.276846	P49792	TH216Y
Q02543_28	2.01286	4.89531	Q02543	TH216Y
P61981_133	1.99994	2.2168	P61981	TH216Y
P14625_727	1.99743	9.52614	P14625	TH216Y
P61088_62	1.9853	1.5296	P61088	TH216Y
P08238_426	1.98482	0.178253	P08238	TH216Y
P55786_908	1.97067	NA	P55786	TH216Y
P86791_380	1.96967	NA	P86791	TH216Y
P11310_397	1.96538	0.252306	P11310	TH216Y
P08708_84	1.9617	0	P08708	TH216Y
P54577_198	1.95789	0.567692	P54577	TH216Y
P39023_291	1.95254	5.68757	P39023	TH216Y
P37840_39	1.94422	0.73024	P37840	TH216Y
P60174_246	1.94315	1.46267	P60174	TH216Y
Q13325_216	1.94261	0.577882	Q13325	TH216Y
Q14008_1860	1.93772	NA	Q14008	TH216Y
P06737_186	1.93592	0.81687	P06737	TH216Y
Q9NZI8_544	1.93318	NA	Q9NZI8	TH216Y
P13804_235	1.9255	10.4627	P13804	TH216Y
Q9BVP2_353	1.91467	NA	Q9BVP2	TH216Y
P24752_170	1.91459	10.5081	P24752	TH216Y
Q13155_35	1.91097	0	Q13155	TH216Y
Q14671_717	1.89258	1.08798	Q14671	TH216Y
P60174_85	1.88906	NA	P60174	TH216Y
P06493_15	1.88876	9.48332	P06493	TH216Y
P23396_166	1.87854	0.586543	P23396	TH216Y
Q9ULK4_258	1.87553	NA	Q9ULK4	TH216Y
Q16576_60	1.87063	NA	Q16576	TH216Y
Q13310_382	1.86239	NA	Q13310	TH216Y
P35080_99	1.84105	0.757586	P35080	TH216Y
Q9Y4L1_497	1.84087	1.19153	Q9Y4L1	TH216Y
Q9Y3F4_127	1.82997	9.70307	Q9Y3F4	TH216Y
O94760_161	1.82519	NA	O94760	TH216Y
P78527_2936	1.81793	NA	P78527	TH216Y
O14802_714	1.81715	NA	O14802	TH216Y
Q14257_303	1.79059	NA	Q14257	TH216Y
Q8N7H5_144	1.78583	0.546489	Q8N7H5	TH216Y
Q9Y285_412	1.78044	NA	Q9Y285	TH216Y
P61964_243	1.77429	NA	P61964	TH216Y
P09543_86	1.76297	2.25616	P09543	TH216Y
P24534_18	1.74982	1.22609	P24534	TH216Y
[truncated: 209 more rows]

## Sheet: Jurkat_live_sol_Y
site	Ratio	Std	uni	treatment
O00154_194	20	NA	O00154	TH211JKsol
O14561_85	20	0	O14561	TH211JKsol
O14639_688	20	NA	O14639	TH211JKsol
O14737_73	20	0	O14737	TH211JKsol
O14818_110	20	6.91665	O14818	TH211JKsol
O14929_363	20	0	O14929	TH211JKsol
O14979_314	20	0	O14979	TH211JKsol
O15260_24	20	9.29614	O15260	TH211JKsol
O15355_160	20	NA	O15355	TH211JKsol
O15355_211	20	0	O15355	TH211JKsol
O43169_138	20	0	O43169	TH211JKsol
O43252_30	20	0.648019	O43252	TH211JKsol
O43390_431	20	0	O43390	TH211JKsol
O43390_434	20	0	O43390	TH211JKsol
O43390_435	20	7.26085	O43390	TH211JKsol
O43399_126	20	6.02671	O43399	TH211JKsol
O43491_456	20	5.65759	O43491	TH211JKsol
O43615_242	20	2.92827	O43615	TH211JKsol
O43809_24	20	0	O43809	TH211JKsol
O60271_518	20	0	O60271	TH211JKsol
O60610_209	20	NA	O60610	TH211JKsol
O60610_773	20	NA	O60610	TH211JKsol
O75369_2032	20	10.0007	O75369	TH211JKsol
O75369_596	20	0	O75369	TH211JKsol
O75390_381	20	1.99624	O75390	TH211JKsol
O75503_106	20	1.39123	O75503	TH211JKsol
O75521_169	20	10.2522	O75521	TH211JKsol
O75521_69	20	6.23285	O75521	TH211JKsol
O75533_1083	20	4.50728	O75533	TH211JKsol
O75663_79	20	0	O75663	TH211JKsol
O75832_138	20	0	O75832	TH211JKsol
O94776_437	20	0	O94776	TH211JKsol
O94903_69	20	3.92418	O94903	TH211JKsol
O95163_1182	20	2.28451	O95163	TH211JKsol
O95166_25	20	0	O95166	TH211JKsol
O95202_598	20	1.00597	O95202	TH211JKsol
O95881_137	20	9.32508	O95881	TH211JKsol
O96008_194	20	6.36776	O96008	TH211JKsol
P00338_239	20	0	P00338	TH211JKsol
P00338_83	20	0.119819	P00338	TH211JKsol
P00558_76	20	9.39072	P00558	TH211JKsol
P00813_67	20	0	P00813	TH211JKsol
P02786_20	20	2.85684	P02786	TH211JKsol
P04075_328	20	5.35766	P04075	TH211JKsol
P04080_97	20	0	P04080	TH211JKsol
P04632_87	20	0	P04632	TH211JKsol
P05141_165	20	0	P05141	TH211JKsol
P06400_790	20	0	P06400	TH211JKsol
P06576_230	20	0	P06576	TH211JKsol
P06576_395	20	0.305672	P06576	TH211JKsol
P06576_418	20	9.44235	P06576	TH211JKsol
P06576_431	20	1.09959	P06576	TH211JKsol
P06733_189	20	8.26992	P06733	TH211JKsol
P06733_280	20	0	P06733	TH211JKsol
P06733_44	20	NA	P06733	TH211JKsol
P06744_363	20	NA	P06744	TH211JKsol
P06748_29	20	0	P06748	TH211JKsol
P07237_196	20	NA	P07237	TH211JKsol
P07237_327	20	3.47552	P07237	TH211JKsol
P07237_414	20	0	P07237	TH211JKsol
P07237_99	20	2.91061	P07237	TH211JKsol
P07437_106	20	1.38193	P07437	TH211JKsol
P07437_159	20	0	P07437	TH211JKsol
P07437_222	20	6.37989	P07437	TH211JKsol
P07437_310	20	0	P07437	TH211JKsol
P07437_340	20	9.58632	P07437	TH211JKsol
P07437_51	20	0	P07437	TH211JKsol
P07602_113	20	0	P07602	TH211JKsol
P07602_418	20	0	P07602	TH211JKsol
P07602_447	20	0	P07602	TH211JKsol
P07766_188	20	7.47908	P07766	TH211JKsol
P07858_225	20	4.27061	P07858	TH211JKsol
P07858_227	20	0	P07858	TH211JKsol
P07900_284	20	4.22677	P07900	TH211JKsol
P07900_528	20	0.602516	P07900	TH211JKsol
P07900_604	20	0	P07900	TH211JKsol
P07900_61	20	1.32661	P07900	TH211JKsol
P07910_137	20	0	P07910	TH211JKsol
P07910_139	20	0	P07910	TH211JKsol
P08133_313	20	6.31337	P08133	TH211JKsol
P08238_276	20	4.22677	P08238	TH211JKsol
P08559_156	20	0	P08559	TH211JKsol
P08559_227	20	0	P08559	TH211JKsol
P08559_289	20	11.1566	P08559	TH211JKsol
P08670_30	20	0	P08670	TH211JKsol
P08670_53	20	0	P08670	TH211JKsol
P09234_37	20	0.662721	P09234	TH211JKsol
P09564_222	20	6.10414	P09564	TH211JKsol
P09651_357	20	0	P09651	TH211JKsol
P09651_366	20	0	P09651	TH211JKsol
P09960_233	20	NA	P09960	TH211JKsol
P0DMP2_170	20	0	P0DMP2	TH211JKsol
P10619_249	20	3.26134	P10619	TH211JKsol
P10768_202	20	0	P10768	TH211JKsol
P10809_385	20	0.982936	P10809	TH211JKsol
P10809_90	20	2.94759	P10809	TH211JKsol
P11142_115	20	8.16489	P11142	TH211JKsol
P11142_431	20	0	P11142	TH211JKsol
P11142_545	20	0	P11142	TH211JKsol
P11177_334	20	0	P11177	TH211JKsol
P12268_459	20	0	P12268	TH211JKsol
P12270_422	20	4.69435	P12270	TH211JKsol
P12694_120	20	6.51742	P12694	TH211JKsol
P12694_195	20	0	P12694	TH211JKsol
P12694_345	20	0	P12694	TH211JKsol
P12694_353	20	9.55505	P12694	TH211JKsol
P12814_681	20	0	P12814	TH211JKsol
P14314_280	20	0	P14314	TH211JKsol
P14317_161	20	0	P14317	TH211JKsol
P14317_83	20	0	P14317	TH211JKsol
P14618_175	20	0	P14618	TH211JKsol
P14625_355	20	0	P14625	TH211JKsol
P14625_401	20	0	P14625	TH211JKsol
P14625_429	20	1.54078	P14625	TH211JKsol
P14625_527	20	5.79673	P14625	TH211JKsol
P14625_563	20	4.4355	P14625	TH211JKsol
P14625_652	20	0	P14625	TH211JKsol
P14625_677	20	1.73865	P14625	TH211JKsol
P14625_727	20	0	P14625	TH211JKsol
P14625_94	20	0	P14625	TH211JKsol
P14866_47	20	0	P14866	TH211JKsol
P14866_48	20	0	P14866	TH211JKsol
P15153_139	20	0	P15153	TH211JKsol
P15311_270	20	0	P15311	TH211JKsol
P16278_488	20	NA	P16278	TH211JKsol
P16615_990	20	0	P16615	TH211JKsol
P16930_244	20	1.11028	P16930	TH211JKsol
P17812_106	20	0	P17812	TH211JKsol
P17812_354	20	NA	P17812	TH211JKsol
P17987_545	20	5.08938	P17987	TH211JKsol
P19174_1253	20	0	P19174	TH211JKsol
P20073_427	20	4.11623	P20073	TH211JKsol
P20700_121	20	1.88611	P20700	TH211JKsol
P20700_240	20	9.52041	P20700	TH211JKsol
P21333_2571	20	9.77169	P21333	TH211JKsol
P21796_173	20	4.76545	P21796	TH211JKsol
P21796_225	20	0	P21796	TH211JKsol
P22626_347	20	0	P22626	TH211JKsol
P22830_123	20	0	P22830	TH211JKsol
P23368_347	20	0	P23368	TH211JKsol
P23786_538	20	0	P23786	TH211JKsol
P23919_151	20	0	P23919	TH211JKsol
P24534_126	20	0	P24534	TH211JKsol
P24534_182	20	0.675004	P24534	TH211JKsol
P24752_170	20	0	P24752	TH211JKsol
P25705_321	20	0	P25705	TH211JKsol
P25705_337	20	7.50606	P25705	TH211JKsol
P25787_57	20	0	P25787	TH211JKsol
P26038_270	20	0	P26038	TH211JKsol
P26368_463	20	4.24952	P26368	TH211JKsol
P26599_267	20	8.20498	P26599	TH211JKsol
P27797_109	20	8.92191	P27797	TH211JKsol
P29692_18	20	0	P29692	TH211JKsol
P29692_182	20	2.77648	P29692	TH211JKsol
P30084_137	20	0	P30084	TH211JKsol
P30101_356	20	0	P30101	TH211JKsol
P30519_154	20	0	P30519	TH211JKsol
P30533_294	20	3.52882	P30533	TH211JKsol
P31942_296	20	0	P31942	TH211JKsol
P31948_58	20	0	P31948	TH211JKsol
P34897_234	20	10.0332	P34897	TH211JKsol
P35573_584	20	4.69125	P35573	TH211JKsol
P35580_580	20	0	P35580	TH211JKsol
P35637_468	20	0	P35637	TH211JKsol
P35914_176	20	0	P35914	TH211JKsol
P36639_48	20	0	P36639	TH211JKsol
P36776_394	20	0	P36776	TH211JKsol
P38159_272	20	3.88993	P38159	TH211JKsol
P38646_161	20	1.58059	P38646	TH211JKsol
P39748_268	20	1.54243	P39748	TH211JKsol
P40939_271	20	0	P40939	TH211JKsol
P40939_283	20	0	P40939	TH211JKsol
P41214_418	20	0	P41214	TH211JKsol
P41252_845	20	0	P41252	TH211JKsol
P43155_606	20	5.25107	P43155	TH211JKsol
P43308_33	20	0	P43308	TH211JKsol
P45880_184	20	4.43349	P45880	TH211JKsol
P45880_236	20	0.834575	P45880	TH211JKsol
P46108_186	20	0	P46108	TH211JKsol
P46109_92	20	10.5361	P46109	TH211JKsol
P46940_172	20	11.4943	P46940	TH211JKsol
P48643_274	20	1.72545	P48643	TH211JKsol
P48643_280	20	NA	P48643	TH211JKsol
P48735_107	20	2.32181	P48735	TH211JKsol
P49368_247	20	0	P49368	TH211JKsol
P49411_122	20	NA	P49411	TH211JKsol
P50395_245	20	0	P50395	TH211JKsol
P50990_30	20	5.17312	P50990	TH211JKsol
P50995_365	20	6.49859	P50995	TH211JKsol
P50995_398	20	0.912954	P50995	TH211JKsol
P50995_493	20	NA	P50995	TH211JKsol
P51571_102	20	0	P51571	TH211JKsol
P51991_188	20	1.33184	P51991	TH211JKsol
P51991_364	20	3.8272	P51991	TH211JKsol
P51991_373	20	0	P51991	TH211JKsol
P52565_133	20	7.94052	P52565	TH211JKsol
P52566_130	20	9.83465	P52566	TH211JKsol
P52597_219	20	0	P52597	TH211JKsol
P52597_266	20	0	P52597	TH211JKsol
P52597_272	20	0	P52597	TH211JKsol
P52732_211	20	0	P52732	TH211JKsol
P52888_221	20	0	P52888	TH211JKsol
P53007_256	20	1.69478	P53007	TH211JKsol
P53041_434	20	3.31872	P53041	TH211JKsol
P53611_30	20	5.10206	P53611	TH211JKsol
P53634_107	20	0	P53634	TH211JKsol
P54725_188	20	0	P54725	TH211JKsol
P54886_653	20	5.17714	P54886	TH211JKsol
P55145_160	20	0	P55145	TH211JKsol
P55265_587	20	0.829399	P55265	TH211JKsol
P55795_276	20	NA	P55795	TH211JKsol
P55809_174	20	0	P55809	TH211JKsol
P56192_201	20	0	P56192	TH211JKsol
P56385_32	20	0	P56385	TH211JKsol
P58876_84	20	1.30257	P58876	TH211JKsol
P60709_188	20	0	P60709	TH211JKsol
P60709_198	20	0	P60709	TH211JKsol
P60900_103	20	NA	P60900	TH211JKsol
P60900_159	20	0	P60900	TH211JKsol
P60981_16	20	2.24087	P60981	TH211JKsol
P61006_5	20	7.83523	P61006	TH211JKsol
P61020_89	20	NA	P61020	TH211JKsol
P61158_16	20	NA	P61158	TH211JKsol
P61221_172	20	0	P61221	TH211JKsol
P61247_155	20	0	P61247	TH211JKsol
P61978_380	20	0	P61978	TH211JKsol
P61978_449	20	4.68447	P61978	TH211JKsol
P62277_38	20	NA	P62277	TH211JKsol
P62750_144	20	8.10411	P62750	TH211JKsol
P62750_74	20	7.09409	P62750	TH211JKsol
P62899_108	20	9.46201	P62899	TH211JKsol
P62993_52	20	NA	P62993	TH211JKsol
P63173_41	20	1.41573	P63173	TH211JKsol
P67809_138	20	4.95801	P67809	TH211JKsol
P67809_158	20	0	P67809	TH211JKsol
P67809_162	20	0	P67809	TH211JKsol
P68363_103	20	0	P68363	TH211JKsol
P68363_108	20	4.11945	P68363	TH211JKsol
P68363_161	20	0	P68363	TH211JKsol
P68363_357	20	0	P68363	TH211JKsol
P68363_399	20	1.87005	P68363	TH211JKsol
P82930_104	20	0	P82930	TH211JKsol
P84077_58	20	NA	P84077	TH211JKsol
P84085_58	20	NA	P84085	TH211JKsol
P99999_49	20	2.81878	P99999	TH211JKsol
P99999_68	20	5.78936	P99999	TH211JKsol
Q00169_62	20	5.01154	Q00169	TH211JKsol
Q00325_196	20	0	Q00325	TH211JKsol
Q00839_266	20	5.99468	Q00839	TH211JKsol
Q00839_669	20	5.7186	Q00839	TH211JKsol
Q01082_1874	20	NA	Q01082	TH211JKsol
Q01082_2249	20	0	Q01082	TH211JKsol
Q01082_2268	20	0.252358	Q01082	TH211JKsol
Q01130_23	20	NA	Q01130	TH211JKsol
Q01518_419	20	0	Q01518	TH211JKsol
Q02543_10	20	NA	Q02543	TH211JKsol
Q04837_73	20	0	Q04837	TH211JKsol
Q04837_99	20	0	Q04837	TH211JKsol
Q07666_435	20	2.36735	Q07666	TH211JKsol
Q07960_191	20	NA	Q07960	TH211JKsol
Q08211_902	20	8.50811	Q08211	TH211JKsol
Q12873_1326	20	0	Q12873	TH211JKsol
Q12874_11	20	NA	Q12874	TH211JKsol
Q12906_891	20	2.30986	Q12906	TH211JKsol
Q12931_559	20	0	Q12931	TH211JKsol
Q13011_149	20	0	Q13011	TH211JKsol
Q13162_54	20	1.03977	Q13162	TH211JKsol
Q13162_60	20	2.94137	Q13162	TH211JKsol
Q13547_87	20	0	Q13547	TH211JKsol
Q13561_313	20	5.34683	Q13561	TH211JKsol
Q13573_260	20	NA	Q13573	TH211JKsol
Q14157_858	20	9.96396	Q14157	TH211JKsol
Q14566_111	20	7.86206	Q14566	TH211JKsol
Q14566_276	20	0	Q14566	TH211JKsol
Q14566_783	20	0	Q14566	TH211JKsol
Q14697_792	20	0.457114	Q14697	TH211JKsol
Q14839_1322	20	0	Q14839	TH211JKsol
Q14974_321	20	0	Q14974	TH211JKsol
Q15007_96	20	5.9547	Q15007	TH211JKsol
Q15041_183	20	0	Q15041	TH211JKsol
Q15366_182	20	4.48193	Q15366	TH211JKsol
Q15428_54	20	5.42378	Q15428	TH211JKsol
Q15437_707	20	0	Q15437	TH211JKsol
Q15782_326	20	NA	Q15782	TH211JKsol
Q15800_39	20	7.92908	Q15800	TH211JKsol
Q16539_182	20	0	Q16539	TH211JKsol
Q16644_76	20	10.9514	Q16644	TH211JKsol
Q16775_193	20	0	Q16775	TH211JKsol
Q16836_264	20	NA	Q16836	TH211JKsol
Q1KMD3_222	20	0	Q1KMD3	TH211JKsol
Q1KMD3_711	20	0	Q1KMD3	TH211JKsol
Q1KMD3_740	20	3.37205	Q1KMD3	TH211JKsol
Q32P28_500	20	4.77165	Q32P28	TH211JKsol
Q3ZCQ8_225	20	0	Q3ZCQ8	TH211JKsol
Q4G176_401	20	0	Q4G176	TH211JKsol
Q4G176_436	20	0	Q4G176	TH211JKsol
Q5JRA6_108	20	8.29302	Q5JRA6	TH211JKsol
Q5JRX3_906	20	7.09883	Q5JRX3	TH211JKsol
Q5VTE0_254	20	9.1119	Q5VTE0	TH211JKsol
Q6P179_826	20	0	Q6P179	TH211JKsol
Q6P2Q9_756	20	0	Q6P2Q9	TH211JKsol
Q709C8_2032	20	2.57294	Q709C8	TH211JKsol
Q7RTV0_54	20	NA	Q7RTV0	TH211JKsol
Q7Z6Z7_697	20	0	Q7Z6Z7	TH211JKsol
Q86TB9_473	20	NA	Q86TB9	TH211JKsol
Q86UX7_436	20	0.553567	Q86UX7	TH211JKsol
Q86V81_77	20	0	Q86V81	TH211JKsol
Q8N183_137	20	10.2873	Q8N183	TH211JKsol
Q8N8N7_100	20	NA	Q8N8N7	TH211JKsol
Q8NBS9_151	20	0	Q8NBS9	TH211JKsol
Q8NBS9_251	20	0	Q8NBS9	TH211JKsol
Q8NBX0_105	20	0	Q8NBX0	TH211JKsol
Q8NBX0_244	20	0	Q8NBX0	TH211JKsol
Q8NC51_207	20	NA	Q8NC51	TH211JKsol
Q8TB37_109	20	NA	Q8TB37	TH211JKsol
Q8TCS8_626	20	7.71109	Q8TCS8	TH211JKsol
Q8WXF1_383	20	6.9039	Q8WXF1	TH211JKsol
Q92499_628	20	NA	Q92499	TH211JKsol
Q92804_427	20	0	Q92804	TH211JKsol
Q92841_75	20	6.31331	Q92841	TH211JKsol
Q92930_5	20	7.83523	Q92930	TH211JKsol
Q92945_290	20	7.70175	Q92945	TH211JKsol
Q92974_356	20	0	Q92974	TH211JKsol
Q969H8_102	20	0	Q969H8	TH211JKsol
Q969H8_123	20	0	Q969H8	TH211JKsol
Q969T9_91	20	NA	Q969T9	TH211JKsol
Q96A26_55	20	0	Q96A26	TH211JKsol
Q96HE7_191	20	0	Q96HE7	TH211JKsol
Q96Q05_469	20	10.4848	Q96Q05	TH211JKsol
Q99426_133	20	NA	Q99426	TH211JKsol
Q99439_12	20	NA	Q99439	TH211JKsol
Q99439_184	20	NA	Q99439	TH211JKsol
Q99470_187	20	0.61548	Q99470	TH211JKsol
Q99536_100	20	0	Q99536	TH211JKsol
Q99536_59	20	0	Q99536	TH211JKsol
Q99714_168	20	3.64535	Q99714	TH211JKsol
Q99729_235	20	0	Q99729	TH211JKsol
Q99729_240	20	0	Q99729	TH211JKsol
Q99797_273	20	2.61915	Q99797	TH211JKsol
Q99807_61	20	4.66787	Q99807	TH211JKsol
Q99880_84	20	1.30257	Q99880	TH211JKsol
Q9BPW8_262	20	0	Q9BPW8	TH211JKsol
Q9BQ95_154	20	NA	Q9BQ95	TH211JKsol
Q9BQP7_205	20	0	Q9BQP7	TH211JKsol
Q9BT09_54	20	0	Q9BT09	TH211JKsol
Q9BX67_271	20	NA	Q9BX67	TH211JKsol
Q9BX67_293	20	NA	Q9BX67	TH211JKsol
Q9BXW7_129	20	0	Q9BXW7	TH211JKsol
Q9C0E8_262	20	5.85506	Q9C0E8	TH211JKsol
Q9H300_74	20	0	Q9H300	TH211JKsol
Q9H4A4_640	20	4.40046	Q9H4A4	TH211JKsol
Q9H6E4_63	20	NA	Q9H6E4	TH211JKsol
Q9H773_129	20	0.33652	Q9H773	TH211JKsol
Q9HB71_71	20	3.54216	Q9HB71	TH211JKsol
Q9HD45_122	20	NA	Q9HD45	TH211JKsol
Q9HD45_583	20	0	Q9HD45	TH211JKsol
Q9NQC3_1057	20	0.889605	Q9NQC3	TH211JKsol
Q9NQC3_1165	20	8.88418	Q9NQC3	TH211JKsol
Q9NRV9_65	20	0	Q9NRV9	TH211JKsol
Q9NT62_18	20	NA	Q9NT62	TH211JKsol
Q9NUJ1_215	20	0	Q9NUJ1	TH211JKsol
Q9NUJ1_87	20	0	Q9NUJ1	TH211JKsol
Q9NY33_417	20	NA	Q9NY33	TH211JKsol
Q9NZ01_44	20	7.33851	Q9NZ01	TH211JKsol
Q9NZQ3_52	20	3.6285	Q9NZQ3	TH211JKsol
Q9P0S9_81	20	NA	Q9P0S9	TH211JKsol
Q9P2J5_473	20	5.6936	Q9P2J5	TH211JKsol
Q9UBM7_468	20	2.50565	Q9UBM7	TH211JKsol
Q9UBX3_149	20	0	Q9UBX3	TH211JKsol
Q9UFN0_32	20	3.56879	Q9UFN0	TH211JKsol
Q9UHB9_618	20	0	Q9UHB9	TH211JKsol
Q9UHC6_1293	20	6.38823	Q9UHC6	TH211JKsol
Q9UHQ4_90	20	0	Q9UHQ4	TH211JKsol
Q9UIJ7_85	20	3.01965	Q9UIJ7	TH211JKsol
Q9UJU6_140	20	0	Q9UJU6	TH211JKsol
Q9UKK9_74	20	0	Q9UKK9	TH211JKsol
Q9UMX0_269	20	0	Q9UMX0	TH211JKsol
Q9UMX5_137	20	0	Q9UMX5	TH211JKsol
Q9Y230_442	20	0	Q9Y230	TH211JKsol
Q9Y262_89	20	1.17461	Q9Y262	TH211JKsol
Q9Y266_292	20	0	Q9Y266	TH211JKsol
Q9Y277_225	20	0	Q9Y277	TH211JKsol
Q9Y285_310	20	3.45245	Q9Y285	TH211JKsol
Q9Y320_199	20	0	Q9Y320	TH211JKsol
Q9Y4L1_534	20	1.67772	Q9Y4L1	TH211JKsol
Q9Y4L1_99	20	0	Q9Y4L1	TH211JKsol
Q9Y5P6_10	20	0	Q9Y5P6	TH211JKsol
Q9Y673_74	20	8.7285	Q9Y673	TH211JKsol
Q9Y6I4_256	20	0	Q9Y6I4	TH211JKsol
Q99797_510	19.9483	NA	Q99797	TH211JKsol
P22234_22	19.948	10.2921	P22234	TH211JKsol
Q9Y2R9_239	19.9161	NA	Q9Y2R9	TH211JKsol
P07195_240	19.8831	0.165251	P07195	TH211JKsol
P52597_276	19.8698	3.78539	P52597	TH211JKsol
Q13162_266	19.7464	6.11498	Q13162	TH211JKsol
Q04837_101	19.7413	7.88132	Q04837	TH211JKsol
Q99798_513	19.6347	0.786457	Q99798	TH211JKsol
Q8WXF1_255	19.546	7.13753	Q8WXF1	TH211JKsol
P07437_50	19.5218	10.8242	P07437	TH211JKsol
Q9H9C1_398	19.5161	0.684313	Q9H9C1	TH211JKsol
P37802_192	19.4481	3.50337	P37802	TH211JKsol
P50454_135	19.4267	9.00552	P50454	TH211JKsol
P23511_298	19.4199	10.9952	P23511	TH211JKsol
P11142_134	19.3435	1.85482	P11142	TH211JKsol
P51149_144	19.3333	3.32176	P51149	TH211JKsol
P38646_331	19.2994	4.61549	P38646	TH211JKsol
Q14761_64	19.2956	6.0713	Q14761	TH211JKsol
Q92945_317	19.2502	1.3056	Q92945	TH211JKsol
P50570_726	19.0782	7.25422	P50570	TH211JKsol
P61758_57	19.0674	1.81099	P61758	TH211JKsol
Q9Y285_305	18.957	2.9544	Q9Y285	TH211JKsol
Q9BX67_282	18.9408	3.97991	Q9BX67	TH211JKsol
P36776_565	18.8255	9.80797	P36776	TH211JKsol
Q9H857_457	18.8024	4.11075	Q9H857	TH211JKsol
O43684_141	18.7976	1.66411	O43684	TH211JKsol
Q16891_33	18.7901	10.3303	Q16891	TH211JKsol
P05141_251	18.7462	NA	P05141	TH211JKsol
P99999_47	18.7375	1.78548	P99999	TH211JKsol
P10809_503	18.6167	1.91143	P10809	TH211JKsol
Q9BUJ2_667	18.6156	2.97082	Q9BUJ2	TH211JKsol
Q9Y262_394	18.6116	9.09298	Q9Y262	TH211JKsol
P55809_407	18.5676	NA	P55809	TH211JKsol
P48735_179	18.5468	5.7753	P48735	TH211JKsol
P84077_35	18.5058	2.1131	P84077	TH211JKsol
P84085_35	18.5058	2.1131	P84085	TH211JKsol
P62937_48	18.4005	2.26206	P62937	TH211JKsol
P04040_84	18.3579	2.80762	P04040	TH211JKsol
O43143_686	18.2965	2.70866	O43143	TH211JKsol
Q99536_330	18.2607	6.48038	Q99536	TH211JKsol
Q6NUK1_328	18.2583	5.94556	Q6NUK1	TH211JKsol
P27797_285	18.2159	5.52278	P27797	TH211JKsol
Q15052_644	18.2113	2.52963	Q15052	TH211JKsol
P14317_177	18.1745	2.58166	P14317	TH211JKsol
Q14696_166	18.1283	1.3435	Q14696	TH211JKsol
Q13596_463	18.1131	1.28902	Q13596	TH211JKsol
Q5JRX3_383	18.1101	10.9804	Q5JRX3	TH211JKsol
Q12906_809	18.0929	2.20215	Q12906	TH211JKsol
P08238_619	18.0356	NA	P08238	TH211JKsol
Q01130_92	17.9936	2.30906	Q01130	TH211JKsol
P26599_430	17.9067	2.9604	P26599	TH211JKsol
P00558_196	17.8921	3.98638	P00558	TH211JKsol
P09543_110	17.8729	NA	P09543	TH211JKsol
Q14683_186	17.8471	0.895608	Q14683	TH211JKsol
P07900_465	17.8014	6.15743	P07900	TH211JKsol
Q9HB71_199	17.7455	6.26877	Q9HB71	TH211JKsol
P49321_635	17.7234	NA	P49321	TH211JKsol
O15173_143	17.6625	8.31805	O15173	TH211JKsol
P62820_112	17.5259	3.59101	P62820	TH211JKsol
O60884_69	17.5215	3.33155	O60884	TH211JKsol
Q92804_156	17.4841	NA	Q92804	TH211JKsol
Q9NR45_71	17.4637	3.5869	Q9NR45	TH211JKsol
Q9UHD9_265	17.4476	3.60964	Q9UHD9	TH211JKsol
P30040_64	17.4467	2.1106	P30040	TH211JKsol
P60709_53	17.4347	NA	P60709	TH211JKsol
P38159_246	17.4331	2.2597	P38159	TH211JKsol
P46934_627	17.4106	2.16934	P46934	TH211JKsol
P53365_104	17.3504	5.33243	P53365	TH211JKsol
P10809_227	17.3002	5.96683	P10809	TH211JKsol
P12268_509	17.2898	2.71485	P12268	TH211JKsol
O75131_203	17.2782	3.40357	O75131	TH211JKsol
Q8N7H5_144	17.2769	0.97527	Q8N7H5	TH211JKsol
O95159_235	17.26	NA	O95159	TH211JKsol
Q8TCS8_539	17.2355	3.90965	Q8TCS8	TH211JKsol
Q99538_221	17.2176	3.93492	Q99538	TH211JKsol
P31948_476	17.0801	NA	P31948	TH211JKsol
Q15717_200	17.0776	9.40541	Q15717	TH211JKsol
P08238_56	17.0529	3.24245	P08238	TH211JKsol
P61978_323	17.0338	2.29556	P61978	TH211JKsol
P31943_276	17.0226	4.21068	P31943	TH211JKsol
P35579_400	17.0093	6.0618	P35579	TH211JKsol
P35580_407	17.0093	6.0618	P35580	TH211JKsol
P42704_570	16.9614	4.29722	P42704	TH211JKsol
Q9NRP2_36	16.9263	4.34692	Q9NRP2	TH211JKsol
Q6P179_892	16.9241	3.5518	Q6P179	TH211JKsol
Q00839_613	16.8913	NA	Q00839	TH211JKsol
O43390_578	16.8582	4.4626	O43390	TH211JKsol
P11717_2351	16.8404	4.4684	P11717	TH211JKsol
O76094_529	16.824	NA	O76094	TH211JKsol
O60664_251	16.822	1.95311	O60664	TH211JKsol
Q7Z4W1_149	16.8009	8.95336	Q7Z4W1	TH211JKsol
Q9HB71_181	16.7953	5.98084	Q9HB71	TH211JKsol
P53396_384	16.7334	5.26613	P53396	TH211JKsol
Q9Y365_171	16.7314	8.20833	Q9Y365	TH211JKsol
O43837_366	16.7241	2.51603	O43837	TH211JKsol
P07737_129	16.6807	0.432807	P07737	TH211JKsol
Q9H9B4_54	16.6147	4.78759	Q9H9B4	TH211JKsol
P62826_155	16.5401	4.89298	P62826	TH211JKsol
P63010_121	16.4458	3.65193	P63010	TH211JKsol
Q13435_568	16.4315	7.58329	Q13435	TH211JKsol
O75964_22	16.4152	8.96573	O75964	TH211JKsol
P07737_60	16.4094	4.79547	P07737	TH211JKsol
P30040_66	16.3582	NA	P30040	TH211JKsol
Q15293_290	16.3568	NA	Q15293	TH211JKsol
P34897_206	16.2161	3.60795	P34897	TH211JKsol
P14625_480	16.2053	6.08413	P14625	TH211JKsol
P61758_60	16.166	3.45634	P61758	TH211JKsol
P25685_31	16.1638	4.42965	P25685	TH211JKsol
Q04837_119	16.1365	2.29777	Q04837	TH211JKsol
P35658_141	16.0446	5.59374	P35658	TH211JKsol
P09211_64	16.0183	5.63094	P09211	TH211JKsol
P38646_652	16.0012	1.76052	P38646	TH211JKsol
Q15008_366	15.9797	NA	Q15008	TH211JKsol
O00267_771	15.9011	NA	O00267	TH211JKsol
P23786_508	15.8243	4.95135	P23786	TH211JKsol
Q9UII2_58	15.8182	6.29734	Q9UII2	TH211JKsol
P68363_272	15.7984	4.99737	P68363	TH211JKsol
O95197_1004	15.7782	9.4186	O95197	TH211JKsol
P31689_33	15.7508	4.77267	P31689	TH211JKsol
P23528_140	15.7425	1.77615	P23528	TH211JKsol
P62805_89	15.7285	4.77784	P62805	TH211JKsol
O14929_14	15.6709	6.12224	O14929	TH211JKsol
Q14203_1149	15.6653	NA	Q14203	TH211JKsol
Q16181_319	15.6589	5.01267	Q16181	TH211JKsol
Q9Y6R4_739	15.6208	6.19307	Q9Y6R4	TH211JKsol
P50897_215	15.6012	5.75263	P50897	TH211JKsol
P20073_231	15.5848	6.24406	P20073	TH211JKsol
P11021_127	15.5794	5.3337	P11021	TH211JKsol
P09211_8	15.54	9.50632	P09211	TH211JKsol
Q99471_43	15.51	5.40567	Q99471	TH211JKsol
P53701_51	15.4994	1.99231	P53701	TH211JKsol
Q9BT09_110	15.4734	7.86664	Q9BT09	TH211JKsol
P26599_127	15.467	5.06225	P26599	TH211JKsol
P11142_41	15.4238	7.16917	P11142	TH211JKsol
P48735_285	15.3987	NA	P48735	TH211JKsol
P07858_244	15.3891	5.16478	P07858	TH211JKsol
P15880_266	15.334	6.40859	P15880	TH211JKsol
P08238_520	15.3038	3.11612	P08238	TH211JKsol
P10809_243	15.303	3.18704	P10809	TH211JKsol
P18583_942	15.2776	4.80626	P18583	TH211JKsol
P68363_312	15.2726	3.93513	P68363	TH211JKsol
Q08211_148	15.2656	6.69543	Q08211	TH211JKsol
P0DMV8_525	15.2343	3.91066	P0DMV8	TH211JKsol
P15259_92	15.1976	2.78159	P15259	TH211JKsol
P18669_92	15.1976	2.78159	P18669	TH211JKsol
Q9H0U3_106	15.1519	7.06247	Q9H0U3	TH211JKsol
Q9BXS5_384	15.134	6.80768	Q9BXS5	TH211JKsol
Q14318_364	15.0974	NA	Q14318	TH211JKsol
P22626_234	15.0004	2.76965	P22626	TH211JKsol
P22830_276	14.9664	3.57889	P22830	TH211JKsol
P08670_61	14.9325	8.63599	P08670	TH211JKsol
Q01518_31	14.9105	2.23477	Q01518	TH211JKsol
O00116_387	14.8802	7.87817	O00116	TH211JKsol
P55145_76	14.8722	0.882851	P55145	TH211JKsol
Q9HCC0_413	14.8299	7.318	Q9HCC0	TH211JKsol
P61604_76	14.8189	4.74039	P61604	TH211JKsol
P09651_167	14.8116	1.03737	P09651	TH211JKsol
Q9H9B4_73	14.7172	7.47106	Q9H9B4	TH211JKsol
Q15084_146	14.6852	2.469	Q15084	TH211JKsol
Q9H857_110	14.6743	4.45828	Q9H857	TH211JKsol
P01130_465	14.6712	7.53599	P01130	TH211JKsol
P06733_257	14.6426	3.97611	P06733	TH211JKsol
Q9P2R7_84	14.6092	10.2397	Q9P2R7	TH211JKsol
P07858_267	14.5919	NA	P07858	TH211JKsol
P27694_446	14.5755	7.84048	P27694	TH211JKsol
Q14697_489	14.526	5.73251	Q14697	TH211JKsol
Q9P258_420	14.4083	7.30281	Q9P258	TH211JKsol
Q9UNH7_311	14.3881	8.34461	Q9UNH7	TH211JKsol
P38646_568	14.3226	0.781845	P38646	TH211JKsol
P61758_180	14.3024	4.84039	P61758	TH211JKsol
P20700_260	14.2714	6.88107	P20700	TH211JKsol
P31040_259	14.1919	4.64576	P31040	TH211JKsol
P21912_128	14.1696	4.02093	P21912	TH211JKsol
P40926_56	14.1273	5.46714	P40926	TH211JKsol
P50990_426	14.0516	7.34599	P50990	TH211JKsol
P09651_341	14.0392	5.47566	P09651	TH211JKsol
P07237_268	14.0341	2.31272	P07237	TH211JKsol
Q08257_53	14.0267	NA	Q08257	TH211JKsol
P38159_241	14.013	NA	P38159	TH211JKsol
Q15283_53	13.983	5.50591	Q15283	TH211JKsol
P30519_268	13.9284	4.34646	P30519	TH211JKsol
P22626_174	13.9156	3.13054	P22626	TH211JKsol
P52566_125	13.829	3.71521	P52566	TH211JKsol
P43243_243	13.796	9.34394	P43243	TH211JKsol
P32929_60	13.7755	2.10416	P32929	TH211JKsol
P04234_160	13.7565	NA	P04234	TH211JKsol
Q9Y6N5_434	13.6984	3.60872	Q9Y6N5	TH211JKsol
P23528_82	13.6643	4.95517	P23528	TH211JKsol
P29692_26	13.6526	8.97657	P29692	TH211JKsol
O43719_173	13.6147	8.42787	O43719	TH211JKsol
Q16576_20	13.5595	2.1772	Q16576	TH211JKsol
Q9HB71_78	13.5442	2.76453	Q9HB71	TH211JKsol
P14625_678	13.4469	6.46294	P14625	TH211JKsol
P25205_251	13.44	4.29948	P25205	TH211JKsol
Q14697_341	13.3524	4.1408	Q14697	TH211JKsol
Q06830_194	13.3432	4.41681	Q06830	TH211JKsol
P38159_310	13.3169	7.71699	P38159	TH211JKsol
Q9Y4L1_531	13.3065	3.87487	Q9Y4L1	TH211JKsol
P25705_343	13.2702	2.72741	P25705	TH211JKsol
Q8N972_168	13.1912	5.85609	Q8N972	TH211JKsol
Q5VTE0_141	13.1903	NA	Q5VTE0	TH211JKsol
Q9UKX7_193	13.1042	4.27039	Q9UKX7	TH211JKsol
Q9BTM1_40	13.0794	9.4123	Q9BTM1	TH211JKsol
Q9H2W6_213	13.0508	8.21295	Q9H2W6	TH211JKsol
P35580_1868	13.0278	9.86011	P35580	TH211JKsol
P53041_136	13.0277	1.93817	P53041	TH211JKsol
O95864_441	12.9673	9.94577	O95864	TH211JKsol
Q5TGZ0_72	12.9642	9.9501	Q5TGZ0	TH211JKsol
P60709_240	12.9446	6.66112	P60709	TH211JKsol
P61978_280	12.9379	3.61912	P61978	TH211JKsol
Q9H1C4_190	12.9253	10.0051	Q9H1C4	TH211JKsol
Q16774_53	12.9147	5.75915	Q16774	TH211JKsol
P55265_483	12.8961	10.0464	P55265	TH211JKsol
Q13451_57	12.8751	3.14272	Q13451	TH211JKsol
P22626_336	12.8348	NA	P22626	TH211JKsol
P13796_447	12.8299	2.86878	P13796	TH211JKsol
O14818_118	12.8139	4.6082	O14818	TH211JKsol
Q8TAA3_126	12.8139	4.6082	Q8TAA3	TH211JKsol
P12268_430	12.7575	8.24255	P12268	TH211JKsol
P09429_78	12.7203	0.202502	P09429	TH211JKsol
P40926_161	12.6864	1.77549	P40926	TH211JKsol
P20700_268	12.582	7.74163	P20700	TH211JKsol
P27824_514	12.5164	6.86846	P27824	TH211JKsol
Q99766_136	12.5141	5.07563	Q99766	TH211JKsol
P06733_57	12.5098	10.5927	P06733	TH211JKsol
P27797_150	12.4509	2.86168	P27797	TH211JKsol
Q9H0C8_298	12.4442	7.96339	Q9H0C8	TH211JKsol
Q99538_217	12.4405	1.0679	Q99538	TH211JKsol
O43615_265	12.2808	1.21167	O43615	TH211JKsol
P25685_67	12.2528	4.96502	P25685	TH211JKsol
Q4G0F5_222	12.245	2.97686	Q4G0F5	TH211JKsol
P07900_627	12.2322	NA	P07900	TH211JKsol
P16278_485	12.2275	1.62896	P16278	TH211JKsol
Q9BSJ8_121	12.2165	9.76066	Q9BSJ8	TH211JKsol
P19338_351	12.2164	11.0076	P19338	TH211JKsol
P52566_107	12.2113	NA	P52566	TH211JKsol
Q14257_97	12.1265	9.98814	Q14257	TH211JKsol
Q16891_81	12.1058	11.1641	Q16891	TH211JKsol
P30101_416	12.105	6.56653	P30101	TH211JKsol
P68363_224	12.0966	0.61912	P68363	TH211JKsol
P41250_467	12.0123	11.2963	P41250	TH211JKsol
Q5VTE0_177	12.0093	5.37991	Q5VTE0	TH211JKsol
O43488_237	11.9991	NA	O43488	TH211JKsol
P38117_192	11.9931	2.02702	P38117	TH211JKsol
Q04760_136	11.9921	7.70812	Q04760	TH211JKsol
Q16891_95	11.9868	8.36929	Q16891	TH211JKsol
P14625_667	11.9676	NA	P14625	TH211JKsol
P49321_540	11.9619	0.774539	P49321	TH211JKsol
Q13177_130	11.924	3.51155	Q13177	TH211JKsol
P35580_22	11.9179	9.78841	P35580	TH211JKsol
P13639_443	11.8799	3.89369	P13639	TH211JKsol
P21796_67	11.8754	2.5109	P21796	TH211JKsol
P11142_107	11.8589	5.36837	P11142	TH211JKsol
Q9Y508_139	11.8543	NA	Q9Y508	TH211JKsol
P27694_193	11.8465	11.5308	P27694	TH211JKsol
P52566_172	11.813	9.09968	P52566	TH211JKsol
O14497_1523	11.7861	6.09641	O14497	TH211JKsol
O43837_121	11.7845	11.6185	O43837	TH211JKsol
Q8NBX0_237	11.7541	3.46629	Q8NBX0	TH211JKsol
Q9H061_133	11.7193	7.9534	Q9H061	TH211JKsol
Q14739_132	11.7092	0.769363	Q14739	TH211JKsol
P23743_22	11.6946	NA	P23743	TH211JKsol
O75251_62	11.6894	5.34962	O75251	TH211JKsol
O00264_113	11.6672	6.58793	O00264	TH211JKsol
P31946_50	11.6662	5.12719	P31946	TH211JKsol
P62258_49	11.6662	5.12719	P62258	TH211JKsol
P08238_596	11.6464	1.16754	P08238	TH211JKsol
Q8NBX0_202	11.6383	2.77789	Q8NBX0	TH211JKsol
P38159_285	11.6354	11.8293	P38159	TH211JKsol
P05141_81	11.5801	5.12581	P05141	TH211JKsol
P07237_116	11.562	7.83554	P07237	TH211JKsol
P13667_273	11.5599	NA	P13667	TH211JKsol
Q96IX5_18	11.5584	0.85799	Q96IX5	TH211JKsol
Q9Y4L1_116	11.5534	9.05231	Q9Y4L1	TH211JKsol
Q9H0C8_265	11.5474	8.69211	Q9H0C8	TH211JKsol
P50402_85	11.5391	6.23309	P50402	TH211JKsol
Q5JTV8_379	11.5176	NA	Q5JTV8	TH211JKsol
Q8WXH0_5390	11.4533	8.28966	Q8WXH0	TH211JKsol
P10606_62	11.4484	NA	P10606	TH211JKsol
P48735_258	11.4477	12.0948	P48735	TH211JKsol
P62937_79	11.4264	10.5405	P62937	TH211JKsol
P38919_155	11.3802	5.11331	P38919	TH211JKsol
Q9NR45_81	11.3655	0.668087	Q9NR45	TH211JKsol
P45880_78	11.3581	4.48083	P45880	TH211JKsol
Q13555_517	11.3436	4.94011	Q13555	TH211JKsol
Q08J23_38	11.3387	6.63421	Q08J23	TH211JKsol
P31689_376	11.3351	0.850312	P31689	TH211JKsol
P27707_204	11.3239	5.82016	P27707	TH211JKsol
O60331_71	11.322	3.89162	O60331	TH211JKsol
P28062_241	11.3007	5.09178	P28062	TH211JKsol
Q9BZJ0_223	11.2703	4.03688	Q9BZJ0	TH211JKsol
P21912_273	11.268	0.810839	P21912	TH211JKsol
Q9BYT8_245	11.2465	5.9308	Q9BYT8	TH211JKsol
P20618_135	11.2401	2.48127	P20618	TH211JKsol
Q5VTE0_85	11.2393	5.30593	Q5VTE0	TH211JKsol
P23528_89	11.2378	5.68269	P23528	TH211JKsol
P54886_782	11.2336	12.3976	P54886	TH211JKsol
Q13573_292	11.2188	2.89234	Q13573	TH211JKsol
P12268_233	11.2008	1.92312	P12268	TH211JKsol
O43143_499	11.1836	5.04196	O43143	TH211JKsol
O15212_16	11.1344	NA	O15212	TH211JKsol
Q9H2U1_22	11.1219	12.5555	Q9H2U1	TH211JKsol
Q6UW68_140	11.1075	5.85925	Q6UW68	TH211JKsol
P35579_1460	11.0926	0.124809	P35579	TH211JKsol
P35580_1467	11.0926	0.124809	P35580	TH211JKsol
Q9UIA9_393	11.0758	12.6208	Q9UIA9	TH211JKsol
P49321_91	11.0349	0.870798	P49321	TH211JKsol
Q9UL25_88	11.0317	9.10912	Q9UL25	TH211JKsol
P43308_175	11.0236	12.6946	P43308	TH211JKsol
P62993_209	10.9737	5.47944	P62993	TH211JKsol
Q16891_636	10.9604	5.9639	Q16891	TH211JKsol
P17812_96	10.9478	NA	P17812	TH211JKsol
P20701_332	10.9099	6.043	P20701	TH211JKsol
Q14696_58	10.9061	5.2211	Q14696	TH211JKsol
O43488_239	10.8971	9.93771	O43488	TH211JKsol
Q9BPW8_261	10.8878	2.0747	Q9BPW8	TH211JKsol
P62633_99	10.8835	8.2195	P62633	TH211JKsol
P38646_128	10.8831	NA	P38646	TH211JKsol
P43243_158	10.8819	0.575067	P43243	TH211JKsol
P50991_24	10.8331	2.20484	P50991	TH211JKsol
Q12931_106	10.8286	3.86275	Q12931	TH211JKsol
Q9UHD8_278	10.8152	NA	Q9UHD8	TH211JKsol
P51149_37	10.8029	NA	P51149	TH211JKsol
P35813_202	10.7663	1.83999	P35813	TH211JKsol
O75791_324	10.7351	7.39874	O75791	TH211JKsol
P31943_82	10.7052	7.44118	P31943	TH211JKsol
O00303_157	10.6093	2.56776	O00303	TH211JKsol
P31943_266	10.5951	2.1088	P31943	TH211JKsol
Q14103_244	10.5757	8.16385	Q14103	TH211JKsol
Q5TBB1_262	10.575	13.329	Q5TBB1	TH211JKsol
P62258_131	10.5043	7.4319	P62258	TH211JKsol
Q3ZCQ8_62	10.504	4.33013	Q3ZCQ8	TH211JKsol
Q08378_210	10.5038	4.99082	Q08378	TH211JKsol
Q9UBB5_196	10.4977	NA	Q9UBB5	TH211JKsol
Q96ST2_762	10.4638	NA	Q96ST2	TH211JKsol
P17844_518	10.4475	9.76403	P17844	TH211JKsol
Q00325_208	10.4355	2.98443	Q00325	TH211JKsol
P21266_120	10.4094	8.57181	P21266	TH211JKsol
Q9Y277_67	10.3377	NA	Q9Y277	TH211JKsol
P25787_6	10.3264	6.13884	P25787	TH211JKsol
Q9H9Q2_198	10.2961	8.08654	Q9H9Q2	TH211JKsol
P27707_210	10.2923	4.53894	P27707	TH211JKsol
Q9NQR4_53	10.2903	0.777396	Q9NQR4	TH211JKsol
P83731_14	10.2782	NA	P83731	TH211JKsol
P47914_98	10.2778	13.7493	P47914	TH211JKsol
P41252_608	10.2638	3.62035	P41252	TH211JKsol
P10809_223	10.2556	5.06221	P10809	TH211JKsol
P14625_280	10.2538	NA	P14625	TH211JKsol
P34897_176	10.2307	NA	P34897	TH211JKsol
P11142_183	10.2142	NA	P11142	TH211JKsol
Q9Y6N5_242	10.2021	13.8563	Q9Y6N5	TH211JKsol
P14317_175	10.1936	NA	P14317	TH211JKsol
O75937_129	10.1579	NA	O75937	TH211JKsol
P11498_651	10.083	14.0248	P11498	TH211JKsol
O15258_174	10.0774	6.20205	O15258	TH211JKsol
P04406_255	10.0253	3.3527	P04406	TH211JKsol
P22033_587	9.94768	0.7806	P22033	TH211JKsol
Q96PK6_665	9.94598	5.82124	Q96PK6	TH211JKsol
P21333_2505	9.85888	5.22665	P21333	TH211JKsol
Q9H9C1_137	9.82207	2.16611	Q9H9C1	TH211JKsol
Q8NBS9_277	9.80619	4.79393	Q8NBS9	TH211JKsol
P27824_214	9.78908	5.78464	P27824	TH211JKsol
P51858_100	9.73641	NA	P51858	TH211JKsol
Q00688_198	9.71096	2.7366	Q00688	TH211JKsol
P37802_8	9.67589	5.18124	P37802	TH211JKsol
P30101_222	9.60189	4.96352	P30101	TH211JKsol
Q8IU81_130	9.57764	NA	Q8IU81	TH211JKsol
P14625_359	9.5498	NA	P14625	TH211JKsol
P21333_1938	9.53211	1.70241	P21333	TH211JKsol
P07910_40	9.51461	3.10778	P07910	TH211JKsol
Q96PK6_261	9.46989	NA	Q96PK6	TH211JKsol
P78417_139	9.45533	6.68509	P78417	TH211JKsol
Q709C8_995	9.45431	10.1587	Q709C8	TH211JKsol
P09651_347	9.39937	7.70545	P09651	TH211JKsol
Q9NUJ1_84	9.3983	2.48464	Q9NUJ1	TH211JKsol
P52306_118	9.34991	3.89452	P52306	TH211JKsol
P06733_236	9.34977	NA	P06733	TH211JKsol
Q9Y2W1_54	9.30239	NA	Q9Y2W1	TH211JKsol
P21333_2501	9.29553	0.929101	P21333	TH211JKsol
Q15382_131	9.22312	8.74649	Q15382	TH211JKsol
P20700_238	9.20539	NA	P20700	TH211JKsol
P99999_75	9.17859	5.73285	P99999	TH211JKsol
O60271_654	9.16505	10.3787	O60271	TH211JKsol
P63241_69	9.15996	4.48981	P63241	TH211JKsol
P50570_626	9.15016	NA	P50570	TH211JKsol
P13073_38	9.14695	6.57661	P13073	TH211JKsol
P22314_60	9.14381	0.77835	P22314	TH211JKsol
Q8N183_32	9.09181	5.31199	Q8N183	TH211JKsol
P43243_508	9.05659	1.73915	P43243	TH211JKsol
P31942_85	9.00988	5.15138	P31942	TH211JKsol
O60610_424	9.00274	11.8823	O60610	TH211JKsol
P62805_73	8.93272	3.93436	P62805	TH211JKsol
P11021_65	8.90784	6.51704	P11021	TH211JKsol
Q96AE4_242	8.89399	10.9314	Q96AE4	TH211JKsol
P21912_156	8.88386	2.16665	P21912	TH211JKsol
O43865_514	8.8781	6.94649	O43865	TH211JKsol
Q9NZ32_377	8.85592	3.0037	Q9NZ32	TH211JKsol
P11021_160	8.75997	NA	P11021	TH211JKsol
P43243_128	8.63378	3.4334	P43243	TH211JKsol
P51784_764	8.5747	NA	P51784	TH211JKsol
P23526_39	8.55596	2.28823	P23526	TH211JKsol
P42167_394	8.54332	1.47989	P42167	TH211JKsol
Q4G148_413	8.53914	2.46861	Q4G148	TH211JKsol
P32942_519	8.52607	9.74567	P32942	TH211JKsol
P10412_71	8.51483	7.813	P10412	TH211JKsol
O00244_31	8.51238	8.94844	O00244	TH211JKsol
P27694_326	8.49619	NA	P27694	TH211JKsol
P53007_276	8.46188	NA	P53007	TH211JKsol
P08559_82	8.42697	4.81419	P08559	TH211JKsol
P27797_75	8.40741	7.3409	P27797	TH211JKsol
O75351_47	8.39964	7.81639	O75351	TH211JKsol
P21912_134	8.37072	1.6164	P21912	TH211JKsol
P11142_525	8.34932	4.04563	P11142	TH211JKsol
O95168_6	8.33515	7.10783	O95168	TH211JKsol
P51659_733	8.29073	6.19001	P51659	TH211JKsol
O43852_275	8.22142	5.6092	O43852	TH211JKsol
P38646_181	8.20727	3.49885	P38646	TH211JKsol
Q00839_525	8.17894	NA	Q00839	TH211JKsol
P51970_168	8.14154	8.66647	P51970	TH211JKsol
P23528_117	8.10527	1.53029	P23528	TH211JKsol
Q8N6T3_183	8.08425	2.93846	Q8N6T3	TH211JKsol
Q14457_413	8.02594	1.82103	Q14457	TH211JKsol
P51572_73	7.9983	4.43175	P51572	TH211JKsol
Q16740_73	7.94248	6.43519	Q16740	TH211JKsol
Q9NRS6_64	7.85026	4.8033	Q9NRS6	TH211JKsol
P27348_48	7.84985	6.14686	P27348	TH211JKsol
Q05048_213	7.84586	4.76983	Q05048	TH211JKsol
P20700_484	7.76592	4.43796	P20700	TH211JKsol
P03928_47	7.7115	4.8915	P03928	TH211JKsol
P62910_95	7.70919	3.7247	P62910	TH211JKsol
Q96DF8_409	7.70842	NA	Q96DF8	TH211JKsol
P30566_294	7.66297	1.79216	P30566	TH211JKsol
Q8N183_106	7.64822	6.33489	Q8N183	TH211JKsol
P06239_192	7.6056	5.82468	P06239	TH211JKsol
Q9Y6Y0_376	7.60227	2.08089	Q9Y6Y0	TH211JKsol
P61960_18	7.57057	1.67569	P61960	TH211JKsol
Q13310_364	7.56888	8.29212	Q13310	TH211JKsol
Q13617_107	7.56193	NA	Q13617	TH211JKsol
P27824_100	7.50889	NA	P27824	TH211JKsol
Q9NP81_52	7.47705	NA	Q9NP81	TH211JKsol
Q9BU89_290	7.46398	5.98496	Q9BU89	TH211JKsol
Q9P2I0_461	7.39545	NA	Q9P2I0	TH211JKsol
P49790_29	7.38647	11.1076	P49790	TH211JKsol
P21291_73	7.38161	NA	P21291	TH211JKsol
P35754_25	7.37284	7.67239	P35754	TH211JKsol
P35579_9	7.37272	6.81293	P35579	TH211JKsol
O43815_107	7.37237	1.83185	O43815	TH211JKsol
Q13033_123	7.37237	1.83185	Q13033	TH211JKsol
O75347_48	7.35515	7.87938	O75347	TH211JKsol
P10747_218	7.32582	NA	P10747	TH211JKsol
Q9H2W6_84	7.23927	5.30087	Q9H2W6	TH211JKsol
P08559_242	7.22773	4.25141	P08559	TH211JKsol
P53990_43	7.18002	NA	P53990	TH211JKsol
Q6JQN1_578	7.17183	2.57769	Q6JQN1	TH211JKsol
P11279_414	7.14618	5.19154	P11279	TH211JKsol
P31948_48	7.11955	7.09528	P31948	TH211JKsol
P43686_239	7.11829	1.17166	P43686	TH211JKsol
P31942_100	7.10865	8.9843	P31942	TH211JKsol
Q02978_202	7.10819	3.81974	Q02978	TH211JKsol
Q15118_365	7.10391	1.801	Q15118	TH211JKsol
O43491_88	7.09644	8.48446	O43491	TH211JKsol
Q9H845_589	7.0607	4.80967	Q9H845	TH211JKsol
O43865_527	7.04	11.2498	O43865	TH211JKsol
Q96HN2_608	7.04	11.2498	Q96HN2	TH211JKsol
P30084_264	7.03791	3.39295	P30084	TH211JKsol
Q14697_113	6.94273	2.03781	Q14697	TH211JKsol
P07437_59	6.93393	0.39315	P07437	TH211JKsol
P07858_230	6.87361	5.11737	P07858	TH211JKsol
O43615_104	6.86583	1.18502	O43615	TH211JKsol
P20073_350	6.85782	0.493257	P20073	TH211JKsol
Q9H8S9_26	6.85593	4.48178	Q9H8S9	TH211JKsol
P62917_133	6.81704	9.03733	P62917	TH211JKsol
P16591_714	6.81625	NA	P16591	TH211JKsol
P12270_682	6.81012	3.47381	P12270	TH211JKsol
P60709_362	6.79497	4.77197	P60709	TH211JKsol
Q9P016_181	6.77977	2.65147	Q9P016	TH211JKsol
Q14697_477	6.72276	8.90558	Q14697	TH211JKsol
P61254_42	6.643	8.32164	P61254	TH211JKsol
Q9UNX3_42	6.643	8.32164	Q9UNX3	TH211JKsol
P14317_103	6.62214	6.22953	P14317	TH211JKsol
P60900_96	6.59991	4.69495	P60900	TH211JKsol
Q1KMD3_726	6.59191	6.17383	Q1KMD3	TH211JKsol
O00170_202	6.58789	3.18354	O00170	TH211JKsol
P08133_76	6.58547	2.89029	P08133	TH211JKsol
Q9BVA0_337	6.51616	7.81829	Q9BVA0	TH211JKsol
P07237_63	6.50566	NA	P07237	TH211JKsol
P61289_196	6.49151	NA	P61289	TH211JKsol
O60271_578	6.4904	1.13962	O60271	TH211JKsol
O95167_41	6.46582	NA	O95167	TH211JKsol
Q99755_77	6.45357	3.68833	Q99755	TH211JKsol
P31689_381	6.43142	5.84158	P31689	TH211JKsol
Q14683_714	6.3966	4.74776	Q14683	TH211JKsol
Q9NQW7_78	6.3945	6.35407	Q9NQW7	TH211JKsol
Q96N66_305	6.38736	2.39504	Q96N66	TH211JKsol
Q8IYB8_215	6.28943	4.51225	Q8IYB8	TH211JKsol
P38159_206	6.24898	4.84769	P38159	TH211JKsol
P43243_202	6.24798	5.50557	P43243	TH211JKsol
P48449_503	6.21879	8.39141	P48449	TH211JKsol
P55327_136	6.21687	NA	P55327	TH211JKsol
P37268_14	6.17737	3.034	P37268	TH211JKsol
Q14980_1610	6.17239	5.2728	Q14980	TH211JKsol
Q96K37_337	6.17236	NA	Q96K37	TH211JKsol
P30086_81	6.1681	NA	P30086	TH211JKsol
P10747_191	6.1665	7.11739	P10747	TH211JKsol
O75688_207	6.15266	10.22	O75688	TH211JKsol
Q8N163_828	6.13881	3.93544	Q8N163	TH211JKsol
O43488_225	6.13222	7.0401	O43488	TH211JKsol
Q92945_626	6.02997	7.35671	Q92945	TH211JKsol
P00492_105	6.02138	8.627	P00492	TH211JKsol
Q14696_190	6.01509	6.45596	Q14696	TH211JKsol
Q9H9P8_285	5.98421	9.27625	Q9H9P8	TH211JKsol
P58876_122	5.97757	NA	P58876	TH211JKsol
Q99880_122	5.97757	NA	Q99880	TH211JKsol
Q9Y3D6_47	5.96897	3.93513	Q9Y3D6	TH211JKsol
Q93009_1091	5.96117	0.568708	Q93009	TH211JKsol
P12270_614	5.94987	8.86691	P12270	TH211JKsol
Q96KB5_74	5.93373	1.33767	Q96KB5	TH211JKsol
P40926_253	5.90851	6.90758	P40926	TH211JKsol
Q8IZ73_177	5.88061	6.84214	Q8IZ73	TH211JKsol
Q1KMD3_741	5.87974	8.3053	Q1KMD3	TH211JKsol
Q06210_553	5.87895	0.972619	Q06210	TH211JKsol
Q9H3N1_219	5.86133	5.31195	Q9H3N1	TH211JKsol
P23246_698	5.8535	NA	P23246	TH211JKsol
Q8N163_100	5.85146	3.25388	Q8N163	TH211JKsol
Q9Y265_454	5.82576	2.25945	Q9Y265	TH211JKsol
P19338_473	5.80378	5.974	P19338	TH211JKsol
Q16836_234	5.77701	3.17112	Q16836	TH211JKsol
P34897_96	5.74684	6.67762	P34897	TH211JKsol
O15400_230	5.74259	5.78881	O15400	TH211JKsol
Q96K37_394	5.69588	3.14984	Q96K37	TH211JKsol
P18583_935	5.68017	6.5574	P18583	TH211JKsol
P49411_246	5.65048	6.10696	P49411	TH211JKsol
Q8WWM7_349	5.64559	0	Q8WWM7	TH211JKsol
P62191_259	5.64133	1.17532	P62191	TH211JKsol
Q00610_1451	5.61673	2.00441	Q00610	TH211JKsol
P62942_27	5.61649	NA	P62942	TH211JKsol
Q92945_625	5.58804	3.40835	Q92945	TH211JKsol
P13984_161	5.54523	0.82151	P13984	TH211JKsol
P05023_10	5.5116	3.85906	P05023	TH211JKsol
P63000_154	5.50481	0.22483	P63000	TH211JKsol
Q9NVR2_281	5.49135	3.50334	Q9NVR2	TH211JKsol
P04406_140	5.45313	1.00515	P04406	TH211JKsol
Q00325_100	5.42416	9.23809	Q00325	TH211JKsol
P49411_92	5.41843	5.45416	P49411	TH211JKsol
Q9H0E2_83	5.4024	9.19604	Q9H0E2	TH211JKsol
Q14697_563	5.40109	7.73649	Q14697	TH211JKsol
P52209_137	5.37824	NA	P52209	TH211JKsol
P86791_380	5.37771	NA	P86791	TH211JKsol
Q96A72_42	5.36109	1.7539	Q96A72	TH211JKsol
P00338_127	5.33598	NA	P00338	TH211JKsol
P52272_64	5.28868	NA	P52272	TH211JKsol
Q9Y2B0_92	5.28076	3.57175	Q9Y2B0	TH211JKsol
Q13907_171	5.2804	2.27644	Q13907	TH211JKsol
O75521_66	5.27083	3.03996	O75521	TH211JKsol
P11310_419	5.26967	1.14952	P11310	TH211JKsol
Q6P2Q9_2091	5.19448	2.13896	Q6P2Q9	TH211JKsol
Q9BWJ5_18	5.13155	6.04864	Q9BWJ5	TH211JKsol
Q8N163_198	5.11986	1.58214	Q8N163	TH211JKsol
Q9Y4L1_476	5.05168	1.29342	Q9Y4L1	TH211JKsol
P55769_11	5.03607	1.78156	P55769	TH211JKsol
P23743_544	5.03507	2.35469	P23743	TH211JKsol
Q99733_85	5.03355	4.20314	Q99733	TH211JKsol
P60709_91	5.02486	2.75517	P60709	TH211JKsol
P61018_189	5.01269	1.66272	P61018	TH211JKsol
Q16543_155	4.97757	1.06717	Q16543	TH211JKsol
Q9Y6C9_95	4.95773	NA	Q9Y6C9	TH211JKsol
Q13151_180	4.92069	NA	Q13151	TH211JKsol
Q14677_106	4.9201	8.92653	Q14677	TH211JKsol
P13667_392	4.91943	1.38103	P13667	TH211JKsol
P33527_277	4.91442	5.10186	P33527	TH211JKsol
P04406_320	4.89592	1.53001	P04406	TH211JKsol
Q07666_440	4.87901	NA	Q07666	TH211JKsol
Q92922_606	4.86713	1.28306	Q92922	TH211JKsol
O15530_524	4.82392	5.73776	O15530	TH211JKsol
P52597_82	4.81663	8.18251	P52597	TH211JKsol
P51659_414	4.73715	3.06252	P51659	TH211JKsol
P53367_136	4.73267	3.92182	P53367	TH211JKsol
P24752_214	4.71618	0.211689	P24752	TH211JKsol
Q6PL24_280	4.69297	NA	Q6PL24	TH211JKsol
P52597_210	4.67474	8.95528	P52597	TH211JKsol
Q00839_257	4.66131	2.9507	Q00839	TH211JKsol
P11021_175	4.65021	8.70746	P11021	TH211JKsol
Q9BTE3_159	4.64196	2.89844	Q9BTE3	TH211JKsol
Q14677_176	4.56913	3.85448	Q14677	TH211JKsol
Q5JRX3_921	4.54587	3.56234	Q5JRX3	TH211JKsol
Q5JRX3_979	4.54177	9.81898	Q5JRX3	TH211JKsol
P05141_51	4.53707	NA	P05141	TH211JKsol
P62277_18	4.53435	NA	P62277	TH211JKsol
Q9UKR5_127	4.53187	1.82749	Q9UKR5	TH211JKsol
Q02218_966	4.53122	2.15425	Q02218	TH211JKsol
P13796_124	4.52817	3.77612	P13796	TH211JKsol
O95433_322	4.51082	1.17333	O95433	TH211JKsol
P34897_100	4.50136	5.1938	P34897	TH211JKsol
Q9C0B1_220	4.49652	2.43447	Q9C0B1	TH211JKsol
P13674_378	4.42806	5.25676	P13674	TH211JKsol
Q6YN16_130	4.42113	3.24231	Q6YN16	TH211JKsol
O75390_345	4.40186	4.89484	O75390	TH211JKsol
Q12931_498	4.36462	8.05454	Q12931	TH211JKsol
O00442_226	4.34109	4.5025	O00442	TH211JKsol
Q9UNZ2_95	4.31274	9.27768	Q9UNZ2	TH211JKsol
P00558_324	4.30181	7.17082	P00558	TH211JKsol
P21912_170	4.2907	2.74391	P21912	TH211JKsol
P61981_154	4.28813	3.60155	P61981	TH211JKsol
Q92526_109	4.28267	9.12069	Q92526	TH211JKsol
O75380_51	4.27688	2.45435	O75380	TH211JKsol
Q9NVE7_128	4.27227	2.29345	Q9NVE7	TH211JKsol
P60468_59	4.25205	2.20876	P60468	TH211JKsol
O95721_160	4.24738	4.49885	O95721	TH211JKsol
Q7KZ85_1184	4.23461	4.74697	Q7KZ85	TH211JKsol
O43399_106	4.16235	9.34896	O43399	TH211JKsol
P55072_755	4.14498	2.06458	P55072	TH211JKsol
Q1KMD3_725	4.14381	1.32049	Q1KMD3	TH211JKsol
P08670_276	4.14032	8.33056	P08670	TH211JKsol
Q5JTV8_203	4.12718	1.70792	Q5JTV8	TH211JKsol
P35579_1861	4.12162	3.62996	P35579	TH211JKsol
P50897_172	4.12002	2.85239	P50897	TH211JKsol
P31040_169	4.11966	9.98483	P31040	TH211JKsol
Q16543_278	4.11059	NA	Q16543	TH211JKsol
Q9NT62_209	4.10949	4.82086	Q9NT62	TH211JKsol
P38159_304	4.09074	5.28098	P38159	TH211JKsol
P23528_85	4.05116	2.15755	P23528	TH211JKsol
Q9Y2L1_826	4.01122	NA	Q9Y2L1	TH211JKsol
Q00169_154	3.99224	2.97227	Q00169	TH211JKsol
Q13813_2423	3.97902	1.49283	Q13813	TH211JKsol
P07814_701	3.97582	3.51998	P07814	TH211JKsol
P50502_348	3.95713	1.36157	P50502	TH211JKsol
Q7L014_1020	3.9383	1.25621	Q7L014	TH211JKsol
Q8IXJ6_104	3.93822	1.30351	Q8IXJ6	TH211JKsol
P20618_133	3.91156	0.135546	P20618	TH211JKsol
P51532_187	3.90645	0.730672	P51532	TH211JKsol
P27824_229	3.89635	3.84166	P27824	TH211JKsol
Q99766_89	3.89618	3.24253	Q99766	TH211JKsol
Q15782_377	3.89584	8.1817	Q15782	TH211JKsol
P12268_110	3.87167	NA	P12268	TH211JKsol
Q9BTU6_159	3.82945	2.7135	Q9BTU6	TH211JKsol
O60884_35	3.82633	0.597769	O60884	TH211JKsol
P20674_80	3.75444	3.99568	P20674	TH211JKsol
P31930_132	3.73147	2.26905	P31930	TH211JKsol
P08133_572	3.72869	NA	P08133	TH211JKsol
P35579_11	3.71787	1.85077	P35579	TH211JKsol
P10768_191	3.69148	1.9791	P10768	TH211JKsol
P50990_47	3.69109	0.210632	P50990	TH211JKsol
P60900_105	3.68202	10.4578	P60900	TH211JKsol
P51570_236	3.61173	3.91341	P51570	TH211JKsol
P51659_676	3.60616	3.11039	P51659	TH211JKsol
Q5XKP0_112	3.59487	1.55767	Q5XKP0	TH211JKsol
Q8N684_317	3.57563	4.54273	Q8N684	TH211JKsol
Q99536_273	3.56313	7.05636	Q99536	TH211JKsol
P30101_467	3.53423	3.08281	P30101	TH211JKsol
Q9HC21_59	3.53253	NA	Q9HC21	TH211JKsol
Q9NRX4_52	3.49564	0.327697	Q9NRX4	TH211JKsol
Q15782_195	3.49188	1.71384	Q15782	TH211JKsol
Q9NQC3_1076	3.48919	0.93734	Q9NQC3	TH211JKsol
Q9BUE0_87	3.48076	1.12624	Q9BUE0	TH211JKsol
P69905_43	3.47939	2.21167	P69905	TH211JKsol
P50990_468	3.47329	NA	P50990	TH211JKsol
Q8IYQ7_549	3.4566	10.5485	Q8IYQ7	TH211JKsol
Q96BR5_194	3.4418	9.64956	Q96BR5	TH211JKsol
O95202_422	3.44069	1.51021	O95202	TH211JKsol
P62191_25	3.43374	1.51801	P62191	TH211JKsol
Q13263_208	3.40881	NA	Q13263	TH211JKsol
Q13573_407	3.3916	2.41794	Q13573	TH211JKsol
P19174_428	3.38732	1.30553	P19174	TH211JKsol
O94903_252	3.38312	1.84129	O94903	TH211JKsol
Q9H444_111	3.32399	1.12198	Q9H444	TH211JKsol
Q9NW68_18	3.32029	NA	Q9NW68	TH211JKsol
P46109_251	3.30815	0.363935	P46109	TH211JKsol
P13667_565	3.29718	2.52242	P13667	TH211JKsol
P09429_162	3.28328	5.89245	P09429	TH211JKsol
P60520_25	3.26963	1.45454	P60520	TH211JKsol
P62333_207	3.21317	NA	P62333	TH211JKsol
Q9H3N1_217	3.18795	2.22698	Q9H3N1	TH211JKsol
P0C7P0_57	3.16493	0	P0C7P0	TH211JKsol
Q9HCC0_177	3.1621	1.29915	Q9HCC0	TH211JKsol
Q8IWX8_897	3.12862	NA	Q8IWX8	TH211JKsol
O75390_185	3.11238	0.891748	O75390	TH211JKsol
O75844_253	3.1112	3.15091	O75844	TH211JKsol
Q9Y5Q8_345	3.08639	3.88031	Q9Y5Q8	TH211JKsol
O95433_333	3.07756	8.91402	O95433	TH211JKsol
P28065_110	3.05615	2.00776	P28065	TH211JKsol
O60502_805	3.05401	1.21171	O60502	TH211JKsol
Q08AM6_23	3.04653	3.08613	Q08AM6	TH211JKsol
P34897_292	3.04185	NA	P34897	TH211JKsol
P50238_12	3.02721	1.10262	P50238	TH211JKsol
Q9NT62_210	3.02222	2.76181	Q9NT62	TH211JKsol
P14868_245	2.96062	6.6724	P14868	TH211JKsol
Q9UHD8_560	2.94093	0.403188	Q9UHD8	TH211JKsol
O00308_347	2.92714	NA	O00308	TH211JKsol
P78406_345	2.92501	NA	P78406	TH211JKsol
Q13573_179	2.90355	2.28931	Q13573	TH211JKsol
P06733_200	2.89774	10.3027	P06733	TH211JKsol
P61916_119	2.89673	3.31211	P61916	TH211JKsol
Q12931_317	2.89339	0.635275	Q12931	TH211JKsol
Q96HE7_188	2.88757	1.15186	Q96HE7	TH211JKsol
Q5ST30_357	2.88493	0	Q5ST30	TH211JKsol
O14497_1226	2.87634	2.38073	O14497	TH211JKsol
O75380_46	2.8253	2.25335	O75380	TH211JKsol
P49411_115	2.80745	1.32441	P49411	TH211JKsol
Q9BUB7_213	2.78887	3.73393	Q9BUB7	TH211JKsol
O60234_75	2.78582	3.34513	O60234	TH211JKsol
Q6GQQ9_623	2.76741	0.918834	Q6GQQ9	TH211JKsol
Q14739_595	2.76676	0.0547055	Q14739	TH211JKsol
P55809_115	2.75514	2.16721	P55809	TH211JKsol
P07900_493	2.74241	3.39797	P07900	TH211JKsol
P38646_196	2.7394	NA	P38646	TH211JKsol
P27797_57	2.73564	4.5331	P27797	TH211JKsol
P85037_266	2.73409	0.529878	P85037	TH211JKsol
Q6IAA8_40	2.71924	0.351526	Q6IAA8	TH211JKsol
P07195_84	2.71644	1.8089	P07195	TH211JKsol
P50402_161	2.68738	1.0403	P50402	TH211JKsol
Q7LDG7_127	2.68375	3.64795	Q7LDG7	TH211JKsol
O75439_142	2.67491	9.64187	O75439	TH211JKsol
Q96JB5_168	2.64087	5.31444	Q96JB5	TH211JKsol
Q9H488_99	2.62869	NA	Q9H488	TH211JKsol
Q9Y282_13	2.62457	6.49264	Q9Y282	TH211JKsol
P27348_128	2.61192	6.14512	P27348	TH211JKsol
Q9Y490_2239	2.59916	6.34195	Q9Y490	TH211JKsol
O14656_43	2.59512	10.0551	O14656	TH211JKsol
P09211_80	2.58931	1.65362	P09211	TH211JKsol
Q8TC07_243	2.58406	0.388893	Q8TC07	TH211JKsol
P63000_139	2.5709	6.25553	P63000	TH211JKsol
Q9Y2L1_106	2.56473	2.58783	Q9Y2L1	TH211JKsol
P35579_650	2.5577	10.2052	P35579	TH211JKsol
Q99567_688	2.54617	0.808012	Q99567	TH211JKsol
O75874_135	2.5286	1.65086	O75874	TH211JKsol
P60842_70	2.51682	4.86572	P60842	TH211JKsol
Q14240_71	2.51682	4.86572	Q14240	TH211JKsol
Q9NRX4_93	2.50643	NA	Q9NRX4	TH211JKsol
Q01082_1805	2.49232	1.82345	Q01082	TH211JKsol
Q9Y371_155	2.48743	3.09328	Q9Y371	TH211JKsol
Q9H1K1_43	2.48601	NA	Q9H1K1	TH211JKsol
P47813_106	2.46661	1.72357	P47813	TH211JKsol
P31943_180	2.46616	0.713043	P31943	TH211JKsol
Q08211_1155	2.43749	4.11501	Q08211	TH211JKsol
Q9UI08_39	2.43395	NA	Q9UI08	TH211JKsol
P06576_331	2.43362	10.536	P06576	TH211JKsol
P67936_126	2.30489	0.859802	P67936	TH211JKsol
P62072_58	2.26925	0.372137	P62072	TH211JKsol
P07355_238	2.26772	0.696214	P07355	TH211JKsol
Q9NQC3_1091	2.26644	4.46057	Q9NQC3	TH211JKsol
P63104_128	2.22022	0.526068	P63104	TH211JKsol
Q14671_784	2.20965	10.352	Q14671	TH211JKsol
Q92922_66	2.1978	1.95313	Q92922	TH211JKsol
P25787_167	2.19093	8.92104	P25787	TH211JKsol
P07954_67	2.17445	3.95626	P07954	TH211JKsol
Q9UHQ4_73	2.17387	1.93272	Q9UHQ4	TH211JKsol
P00558_161	2.1728	0.23171	P00558	TH211JKsol
Q96HH6_125	2.16042	3.80212	Q96HH6	TH211JKsol
Q92793_632	2.15578	1.78065	Q92793	TH211JKsol
Q99436_34	2.14336	1.63047	Q99436	TH211JKsol
Q96ST2_665	2.12978	1.27481	Q96ST2	TH211JKsol
P49327_1253	2.08396	0.404546	P49327	TH211JKsol
Q8N4Q0_224	2.07022	2.25406	Q8N4Q0	TH211JKsol
O75533_1288	2.06917	1.06446	O75533	TH211JKsol
Q15796_366	2.05687	4.03647	Q15796	TH211JKsol
Q9Y262_36	2.01257	0.613876	Q9Y262	TH211JKsol
O14949_78	2.00591	0	O14949	TH211JKsol
P08621_219	1.98359	1.28575	P08621	TH211JKsol
P07900_492	1.97225	2.19098	P07900	TH211JKsol
P11586_258	1.86099	2.05139	P11586	TH211JKsol
Q01082_1983	1.85066	0.0811665	Q01082	TH211JKsol
O75947_152	1.84414	8.31	O75947	TH211JKsol
Q92804_274	1.81428	10.6902	Q92804	TH211JKsol
Q08431_252	1.77849	8.7408	Q08431	TH211JKsol
P31948_468	1.76674	0.47771	P31948	TH211JKsol
O60341_807	1.74463	NA	O60341	TH211JKsol
Q9Y230_215	1.71874	1.17268	Q9Y230	TH211JKsol
Q5VTE0_29	1.66244	10.5869	Q5VTE0	TH211JKsol
Q9Y312_188	1.6411	6.10603	Q9Y312	TH211JKsol
P28074_228	1.63635	10.7495	P28074	TH211JKsol
P55265_493	1.63427	0.769347	P55265	TH211JKsol
Q8NBJ5_217	1.60095	0.569539	Q8NBJ5	TH211JKsol
P63010_6	1.59673	1.00384	P63010	TH211JKsol
P14317_140	1.59461	0.513378	P14317	TH211JKsol
P36578_277	1.59113	1.81017	P36578	TH211JKsol
Q96RL7_1341	1.59004	0.735831	Q96RL7	TH211JKsol
P78344_29	1.58665	2.56681	P78344	TH211JKsol
Q93009_106	1.58134	1.54518	Q93009	TH211JKsol
Q13573_448	1.57935	3.01327	Q13573	TH211JKsol
Q14165_131	1.51593	1.99363	Q14165	TH211JKsol
Q92900_316	1.50887	NA	Q92900	TH211JKsol
Q9NZ63_277	1.48715	1.07804	Q9NZ63	TH211JKsol
P13667_367	1.4391	0.469524	P13667	TH211JKsol
P54578_151	1.409	1.17687	P54578	TH211JKsol
P38646_118	1.38562	NA	P38646	TH211JKsol
Q5HYK3_127	1.37661	1.21994	Q5HYK3	TH211JKsol
P10747_206	1.35916	3.29514	P10747	TH211JKsol
Q13263_242	1.34824	3.06044	Q13263	TH211JKsol
O75131_392	1.31934	0.39916	O75131	TH211JKsol
Q9Y2Z0_277	1.31412	2.32311	Q9Y2Z0	TH211JKsol
P30101_67	1.28325	NA	P30101	TH211JKsol
Q9Y2I7_92	1.21415	0.840298	Q9Y2I7	TH211JKsol
P23368_82	1.19774	0.367126	P23368	TH211JKsol
P07195_173	1.19367	NA	P07195	TH211JKsol
Q92506_169	1.1886	0.170521	Q92506	TH211JKsol
P52597_194	1.17548	0.678261	P52597	TH211JKsol
Q13217_284	1.13623	NA	Q13217	TH211JKsol
Q9UBS4_89	1.11235	NA	Q9UBS4	TH211JKsol
Q8N4N3_435	1.1097	NA	Q8N4N3	TH211JKsol
P40121_116	1.10558	1.00564	P40121	TH211JKsol
Q15118_411	1.07944	1.15434	Q15118	TH211JKsol
P23368_84	1.0713	0.206048	P23368	TH211JKsol
P35580_826	1.06361	0.772134	P35580	TH211JKsol
O15042_158	1.05616	NA	O15042	TH211JKsol
Q5VTE0_167	1.05366	1.51339	Q5VTE0	TH211JKsol
P11586_852	1.05044	1.68402	P11586	TH211JKsol
Q96ND0_221	0.988845	1.69456	Q96ND0	TH211JKsol
P78527_2965	0.987637	NA	P78527	TH211JKsol
P10747_209	0.985117	1.73742	P10747	TH211JKsol
O95319_508	0.970748	0.721601	O95319	TH211JKsol
Q96RL7_98	0.94562	NA	Q96RL7	TH211JKsol
P53396_364	0.940036	NA	P53396	TH211JKsol
Q3MHD2_34	0.877999	0.381115	Q3MHD2	TH211JKsol
Q92889_344	0.851759	8.92523	Q92889	TH211JKsol
O75717_58	0.828408	6.63037	O75717	TH211JKsol
O43765_182	0.824145	0.435047	O43765	TH211JKsol
Q9H9C1_11	0.815618	11.3036	Q9H9C1	TH211JKsol
Q9NR56_68	0.802735	0.0393985	Q9NR56	TH211JKsol
P13995_234	0.796215	NA	P13995	TH211JKsol
Q06124_546	0.793494	NA	Q06124	TH211JKsol
P52566_24	0.789041	1.55777	P52566	TH211JKsol
O14737_80	0.788614	2.32141	O14737	TH211JKsol
Q52LJ0_258	0.781342	3.64267	Q52LJ0	TH211JKsol
Q14847_13	0.780953	0.967426	Q14847	TH211JKsol
Q53GS9_430	0.768856	2.31974	Q53GS9	TH211JKsol
P06280_123	0.756939	NA	P06280	TH211JKsol
Q7L014_961	0.730042	0.0632062	Q7L014	TH211JKsol
O43502_75	0.720684	0.263776	O43502	TH211JKsol
O43660_77	0.707804	NA	O43660	TH211JKsol
P23921_285	0.688887	0.565548	P23921	TH211JKsol
Q9Y5Q8_331	0.687667	1.85105	Q9Y5Q8	TH211JKsol
O75534_37	0.678838	1.2806	O75534	TH211JKsol
Q99832_222	0.649098	NA	Q99832	TH211JKsol
Q9NUB1_397	0.638483	1.90219	Q9NUB1	TH211JKsol
P14625_258	0.61331	NA	P14625	TH211JKsol
Q96ST3_565	0.605758	0.468882	Q96ST3	TH211JKsol
O43765_141	0.594268	NA	O43765	TH211JKsol
Q9UNZ2_167	0.580547	0.459514	Q9UNZ2	TH211JKsol
Q13200_751	0.50359	NA	Q13200	TH211JKsol
Q96PK6_648	0.453382	0.251774	Q96PK6	TH211JKsol
Q96PK6_588	0.432966	0.394446	Q96PK6	TH211JKsol
P31948_444	0.416249	0.612012	P31948	TH211JKsol
P02765_227	0.407723	0.413063	P02765	TH211JKsol
P31943_195	0.390625	3.56288	P31943	TH211JKsol
P30876_1018	0.381421	0.194259	P30876	TH211JKsol
P25788_59	0.321642	NA	P25788	TH211JKsol
P69905_25	0.303246	0.244228	P69905	TH211JKsol
Q9BTU6_131	0.293875	0.289794	Q9BTU6	TH211JKsol
P08758_308	0.29088	0.380582	P08758	TH211JKsol
Q8WUM4_233	0.278741	NA	Q8WUM4	TH211JKsol
O00267_787	0.273264	NA	O00267	TH211JKsol
Q96RN5_542	0.223509	NA	Q96RN5	TH211JKsol
P27701_261	0.197548	1.59398	P27701	TH211JKsol
P68371_50	0.161043	8.10847	P68371	TH211JKsol
Q9NTJ5_272	0.152541	0.438943	Q9NTJ5	TH211JKsol
P38159_234	0.148906	NA	P38159	TH211JKsol
O60637_140	0.124387	0.0264821	O60637	TH211JKsol
Q9BTL3_91	0.121849	0.162766	Q9BTL3	TH211JKsol
P30085_49	0.0668153	0.0237804	P30085	TH211JKsol

## Sheet: Jurkat_live_mem_Y
site	Ratio	Std	uni	treatment
B0I1T2_350	20	0	B0I1T2	Jklivemem
O00116_387	20	11.1708	O00116	Jklivemem
O00154_162	20	NA	O00154	Jklivemem
O00154_181	20	0	O00154	Jklivemem
O00170_38	20	0	O00170	Jklivemem
O00217_38	20	0	O00217	Jklivemem
O00264_164	20	11.065	O00264	Jklivemem
O00303_289	20	0	O00303	Jklivemem
O00483_65	20	0	O00483	Jklivemem
O00541_265	20	0	O00541	Jklivemem
O00567_277	20	5.72097	O00567	Jklivemem
O00571_243	20	0	O00571	Jklivemem
O00571_266	20	0	O00571	Jklivemem
O00767_356	20	0	O00767	Jklivemem
O14561_147	20	NA	O14561	Jklivemem
O14561_85	20	0	O14561	Jklivemem
O14818_153	20	0	O14818	Jklivemem
O14929_363	20	0	O14929	Jklivemem
O14950_143	20	NA	O14950	Jklivemem
O14980_77	20	NA	O14980	Jklivemem
O15042_603	20	0	O15042	Jklivemem
O15355_27	20	0	O15355	Jklivemem
O15355_405	20	0	O15355	Jklivemem
O15372_277	20	0	O15372	Jklivemem
O43143_710	20	NA	O43143	Jklivemem
O43390_147	20	2.43742	O43390	Jklivemem
O43390_208	20	0	O43390	Jklivemem
O43390_296	20	0	O43390	Jklivemem
O43390_435	20	2.57656	O43390	Jklivemem
O43759_18	20	0	O43759	Jklivemem
O43765_141	20	6.70628	O43765	Jklivemem
O43808_252	20	9.44978	O43808	Jklivemem
O60256_113	20	NA	O60256	Jklivemem
O60341_807	20	10.1393	O60341	Jklivemem
O60488_59	20	0	O60488	Jklivemem
O60701_286	20	NA	O60701	Jklivemem
O60711_375	20	NA	O60711	Jklivemem
O75083_238	20	5.70276	O75083	Jklivemem
O75083_338	20	0	O75083	Jklivemem
O75083_348	20	0	O75083	Jklivemem
O75083_497	20	3.51924	O75083	Jklivemem
O75251_62	20	0	O75251	Jklivemem
O75494_33	20	NA	O75494	Jklivemem
O75569_145	20	0.429159	O75569	Jklivemem
O75643_1770	20	NA	O75643	Jklivemem
O75643_861	20	0	O75643	Jklivemem
O75947_57	20	0	O75947	Jklivemem
O76003_194	20	NA	O76003	Jklivemem
O76003_200	20	NA	O76003	Jklivemem
O76003_204	20	NA	O76003	Jklivemem
O94874_266	20	0	O94874	Jklivemem
O94888_227	20	NA	O94888	Jklivemem
O94903_69	20	8.70253	O94903	Jklivemem
O95168_6	20	4.94137	O95168	Jklivemem
O95202_165	20	NA	O95202	Jklivemem
O95571_192	20	NA	O95571	Jklivemem
O95571_197	20	NA	O95571	Jklivemem
O95573_68	20	0	O95573	Jklivemem
O95721_122	20	NA	O95721	Jklivemem
O96008_194	20	0	O96008	Jklivemem
P00338_10	20	NA	P00338	Jklivemem
P00338_145	20	NA	P00338	Jklivemem
P00338_247	20	NA	P00338	Jklivemem
P00338_281	20	NA	P00338	Jklivemem
P00367_193	20	9.70051	P00367	Jklivemem
P00387_94	20	8.15389	P00387	Jklivemem
P00966_113	20	1.353	P00966	Jklivemem
P02786_20	20	0.870104	P02786	Jklivemem
P04053_462	20	10.2986	P04053	Jklivemem
P04075_214	20	NA	P04075	Jklivemem
P04075_85	20	NA	P04075	Jklivemem
P04183_61	20	0	P04183	Jklivemem
P04406_320	20	7.86483	P04406	Jklivemem
P04843_387	20	8.61162	P04843	Jklivemem
P04899_147	20	0	P04899	Jklivemem
P04899_168	20	8.31114	P04899	Jklivemem
P05141_165	20	0.44301	P05141	Jklivemem
P05141_291	20	6.74766	P05141	Jklivemem
P05141_297	20	NA	P05141	Jklivemem
P05141_51	20	0	P05141	Jklivemem
P05141_81	20	NA	P05141	Jklivemem
P05388_24	20	0	P05388	Jklivemem
P05771_515	20	0	P05771	Jklivemem
P05771_518	20	0	P05771	Jklivemem
P06127_453	20	0	P06127	Jklivemem
P06239_394	20	4.38087	P06239	Jklivemem
P06239_441	20	0	P06239	Jklivemem
P06239_470	20	4.40611	P06239	Jklivemem
P06400_790	20	9.97417	P06400	Jklivemem
P06493_181	20	0	P06493	Jklivemem
P06493_286	20	0	P06493	Jklivemem
P06576_361	20	NA	P06576	Jklivemem
P06733_200	20	NA	P06733	Jklivemem
P06733_287	20	0	P06733	Jklivemem
P06748_29	20	4.56104	P06748	Jklivemem
P07437_106	20	NA	P07437	Jklivemem
P07437_208	20	NA	P07437	Jklivemem
P07437_36	20	0	P07437	Jklivemem
P07437_51	20	0	P07437	Jklivemem
P07814_507	20	0	P07814	Jklivemem
P07814_546	20	10.7984	P07814	Jklivemem
P07900_604	20	6.15924	P07900	Jklivemem
P08238_155	20	0	P08238	Jklivemem
P08238_192	20	0	P08238	Jklivemem
P08238_301	20	0	P08238	Jklivemem
P08238_305	20	0	P08238	Jklivemem
P08238_485	20	0	P08238	Jklivemem
P08238_619	20	0.0187068	P08238	Jklivemem
P08559_156	20	8.77214	P08559	Jklivemem
P08574_179	20	0	P08574	Jklivemem
P08621_161	20	NA	P08621	Jklivemem
P08708_20	20	11.3219	P08708	Jklivemem
P09211_64	20	0	P09211	Jklivemem
P09488_62	20	4.87803	P09488	Jklivemem
P09651_167	20	1.40494	P09651	Jklivemem
P09651_341	20	4.65054	P09651	Jklivemem
P09651_347	20	8.74559	P09651	Jklivemem
P09651_357	20	0	P09651	Jklivemem
P09651_366	20	0	P09651	Jklivemem
P09651_62	20	0	P09651	Jklivemem
P09661_117	20	NA	P09661	Jklivemem
P09874_794	20	0	P09874	Jklivemem
P09874_829	20	1.43366	P09874	Jklivemem
P0C0S5_61	20	NA	P0C0S5	Jklivemem
P0C7P0_108	20	8.82145	P0C7P0	Jklivemem
P10606_62	20	6.38611	P10606	Jklivemem
P11021_175	20	0	P11021	Jklivemem
P11021_65	20	11.3551	P11021	Jklivemem
P11142_149	20	3.93851	P11142	Jklivemem
P11142_371	20	0	P11142	Jklivemem
P11310_419	20	NA	P11310	Jklivemem
P11586_307	20	8.61039	P11586	Jklivemem
P11586_348	20	0	P11586	Jklivemem
P11586_429	20	NA	P11586	Jklivemem
P11586_723	20	0	P11586	Jklivemem
P11586_816	20	0	P11586	Jklivemem
P11940_116	20	0	P11940	Jklivemem
P11940_364	20	0	P11940	Jklivemem
P12004_60	20	NA	P12004	Jklivemem
P13010_295	20	NA	P13010	Jklivemem
P13010_316	20	6.28316	P13010	Jklivemem
P13073_38	20	7.73074	P13073	Jklivemem
P13639_411	20	6.49183	P13639	Jklivemem
P13639_79	20	NA	P13639	Jklivemem
P13804_235	20	5.51538	P13804	Jklivemem
P13804_84	20	NA	P13804	Jklivemem
P14618_175	20	0.0381687	P14618	Jklivemem
P14625_727	20	0	P14625	Jklivemem
P14625_94	20	NA	P14625	Jklivemem
P14866_130	20	NA	P14866	Jklivemem
P14866_163	20	NA	P14866	Jklivemem
P14866_285	20	0	P14866	Jklivemem
P14866_359	20	2.74341	P14866	Jklivemem
P14866_363	20	11.0841	P14866	Jklivemem
P14866_387	20	NA	P14866	Jklivemem
P14866_465	20	0	P14866	Jklivemem
P14868_245	20	9.67213	P14868	Jklivemem
P15880_169	20	7.2846	P15880	Jklivemem
P15880_250	20	0	P15880	Jklivemem
P15880_266	20	0	P15880	Jklivemem
P15954_19	20	6.74818	P15954	Jklivemem
P16615_427	20	NA	P16615	Jklivemem
P17252_512	20	0	P17252	Jklivemem
P17252_515	20	0	P17252	Jklivemem
P17844_148	20	0	P17844	Jklivemem
P17987_121	20	0	P17987	Jklivemem
P18124_144	20	8.67342	P18124	Jklivemem
P18124_155	20	0.813838	P18124	Jklivemem
P18124_51	20	0	P18124	Jklivemem
P18621_63	20	3.8767	P18621	Jklivemem
P18669_92	20	0	P18669	Jklivemem
P18887_370	20	0	P18887	Jklivemem
P19784_308	20	0	P19784	Jklivemem
P20042_278	20	NA	P20042	Jklivemem
P21796_247	20	5.99566	P21796	Jklivemem
P21796_67	20	0	P21796	Jklivemem
P21912_150	20	NA	P21912	Jklivemem
P22087_313	20	0	P22087	Jklivemem
P22626_234	20	8.99614	P22626	Jklivemem
P22626_247	20	0	P22626	Jklivemem
P22626_347	20	0	P22626	Jklivemem
P23246_381	20	0	P23246	Jklivemem
P23368_347	20	NA	P23368	Jklivemem
P23368_361	20	NA	P23368	Jklivemem
P23528_117	20	0	P23528	Jklivemem
P23743_623	20	11.3315	P23743	Jklivemem
P24666_132	20	NA	P24666	Jklivemem
P24752_331	20	0	P24752	Jklivemem
P25205_312	20	0	P25205	Jklivemem
P25398_114	20	0	P25398	Jklivemem
P25705_321	20	0	P25705	Jklivemem
P25787_178	20	NA	P25787	Jklivemem
P26196_150	20	NA	P26196	Jklivemem
P26358_1457	20	0	P26358	Jklivemem
P26599_127	20	8.81954	P26599	Jklivemem
P26639_298	20	4.70526	P26639	Jklivemem
P26640_601	20	NA	P26640	Jklivemem
P26641_145	20	NA	P26641	Jklivemem
P27348_19	20	0	P27348	Jklivemem
P27348_211	20	0	P27348	Jklivemem
P27348_48	20	NA	P27348	Jklivemem
P27694_326	20	6.39076	P27694	Jklivemem
P27694_446	20	5.93592	P27694	Jklivemem
P27797_299	20	NA	P27797	Jklivemem
P28066_185	20	NA	P28066	Jklivemem
P28288_507	20	0	P28288	Jklivemem
P28288_513	20	3.41567	P28288	Jklivemem
P28340_545	20	NA	P28340	Jklivemem
P28838_178	20	7.29456	P28838	Jklivemem
P28838_438	20	10.2532	P28838	Jklivemem
P29401_202	20	NA	P29401	Jklivemem
P29401_275	20	11.1493	P29401	Jklivemem
P30048_221	20	NA	P30048	Jklivemem
P30101_445	20	10.4741	P30101	Jklivemem
P31040_124	20	0	P31040	Jklivemem
P31040_141	20	NA	P31040	Jklivemem
P31040_156	20	NA	P31040	Jklivemem
P31040_263	20	0	P31040	Jklivemem
P31040_330	20	1.12004	P31040	Jklivemem
P31146_321	20	7.70981	P31146	Jklivemem
P31689_376	20	0	P31689	Jklivemem
P31689_381	20	0	P31689	Jklivemem
P31930_132	20	0	P31930	Jklivemem
P31939_303	20	0	P31939	Jklivemem
P31942_262	20	8.17313	P31942	Jklivemem
P31942_285	20	8.59777	P31942	Jklivemem
P31942_296	20	0	P31942	Jklivemem
P31943_180	20	5.96668	P31943	Jklivemem
P31943_236	20	0	P31943	Jklivemem
P31943_243	20	0	P31943	Jklivemem
P33991_421	20	0	P33991	Jklivemem
P33991_522	20	3.96548	P33991	Jklivemem
P33991_524	20	NA	P33991	Jklivemem
P33991_532	20	0	P33991	Jklivemem
P33992_332	20	6.63224	P33992	Jklivemem
P33992_403	20	7.27276	P33992	Jklivemem
P33993_126	20	6.75883	P33993	Jklivemem
P33993_333	20	0	P33993	Jklivemem
P33993_393	20	0	P33993	Jklivemem
P34897_141	20	NA	P34897	Jklivemem
P34897_206	20	0	P34897	Jklivemem
P34897_292	20	NA	P34897	Jklivemem
P35579_573	20	0	P35579	Jklivemem
P35579_754	20	0	P35579	Jklivemem
P35659_142	20	1.04988	P35659	Jklivemem
P36915_441	20	0	P36915	Jklivemem
P36969_59	20	0	P36969	Jklivemem
P37837_206	20	NA	P37837	Jklivemem
P38117_192	20	7.31108	P38117	Jklivemem
P38159_246	20	NA	P38159	Jklivemem
P38159_255	20	0	P38159	Jklivemem
P38646_196	20	9.58079	P38646	Jklivemem
P38646_652	20	0	P38646	Jklivemem
P39023_274	20	0.471659	P39023	Jklivemem
P40429_192	20	9.94288	P40429	Jklivemem
P40429_48	20	7.54225	P40429	Jklivemem
P40763_686	20	NA	P40763	Jklivemem
P40926_287	20	NA	P40926	Jklivemem
P41240_64	20	2.71265	P41240	Jklivemem
P41250_467	20	0	P41250	Jklivemem
P41252_535	20	NA	P41252	Jklivemem
P41252_608	20	3.16062	P41252	Jklivemem
P41252_626	20	0	P41252	Jklivemem
P41252_845	20	0	P41252	Jklivemem
P42704_1215	20	NA	P42704	Jklivemem
P42704_1220	20	NA	P42704	Jklivemem
P42704_1251	20	NA	P42704	Jklivemem
P42704_1328	20	0	P42704	Jklivemem
P42704_441	20	NA	P42704	Jklivemem
P42704_570	20	0	P42704	Jklivemem
P43243_202	20	0	P43243	Jklivemem
P43243_243	20	0	P43243	Jklivemem
P43243_474	20	10.6655	P43243	Jklivemem
P43243_827	20	8.30223	P43243	Jklivemem
P45880_184	20	3.42499	P45880	Jklivemem
P45880_236	20	0	P45880	Jklivemem
P46776_109	20	0.56545	P46776	Jklivemem
P46776_61	20	6.56789	P46776	Jklivemem
P46777_219	20	5.50093	P46777	Jklivemem
P46777_240	20	0	P46777	Jklivemem
P46778_65	20	0	P46778	Jklivemem
P46779_25	20	NA	P46779	Jklivemem
P46779_40	20	4.73718	P46779	Jklivemem
P46779_77	20	5.05215	P46779	Jklivemem
P46781_13	20	NA	P46781	Jklivemem
P46781_96	20	0	P46781	Jklivemem
P47914_98	20	NA	P47914	Jklivemem
P48147_76	20	NA	P48147	Jklivemem
P48449_503	20	0	P48449	Jklivemem
P48651_245	20	8.97345	P48651	Jklivemem
P48735_222	20	NA	P48735	Jklivemem
P49207_34	20	0	P49207	Jklivemem
P49207_78	20	0	P49207	Jklivemem
P49368_247	20	4.40504	P49368	Jklivemem
P49368_303	20	0	P49368	Jklivemem
P49411_122	20	0	P49411	Jklivemem
P49411_133	20	1.52172	P49411	Jklivemem
P49411_266	20	NA	P49411	Jklivemem
P49411_357	20	0	P49411	Jklivemem
P49588_279	20	2.67939	P49588	Jklivemem
P49736_559	20	1.6939	P49736	Jklivemem
P49915_185	20	1.13378	P49915	Jklivemem
P50148_192	20	NA	P50148	Jklivemem
P50213_133	20	NA	P50213	Jklivemem
P50402_85	20	0	P50402	Jklivemem
P50570_726	20	0	P50570	Jklivemem
P50914_72	20	NA	P50914	Jklivemem
P50995_365	20	0	P50995	Jklivemem
P51532_718	20	6.86243	P51532	Jklivemem
P51532_901	20	5.2658	P51532	Jklivemem
P51649_519	20	NA	P51649	Jklivemem
P51659_505	20	NA	P51659	Jklivemem
P51991_364	20	7.09787	P51991	Jklivemem
P51991_373	20	7.57224	P51991	Jklivemem
P52272_213	20	9.06303	P52272	Jklivemem
P52565_149	20	0	P52565	Jklivemem
P52565_175	20	0	P52565	Jklivemem
P52597_219	20	0	P52597	Jklivemem
P52597_243	20	NA	P52597	Jklivemem
P52597_266	20	0	P52597	Jklivemem
P52597_272	20	0	P52597	Jklivemem
P52948_1337	20	NA	P52948	Jklivemem
P53007_256	20	5.25944	P53007	Jklivemem
P53396_579	20	10.4025	P53396	Jklivemem
P53396_704	20	5.03253	P53396	Jklivemem
P53582_291	20	NA	P53582	Jklivemem
P53621_1177	20	NA	P53621	Jklivemem
P53621_628	20	NA	P53621	Jklivemem
P53701_192	20	NA	P53701	Jklivemem
P53701_204	20	0	P53701	Jklivemem
P53801_165	20	NA	P53801	Jklivemem
P54136_113	20	NA	P54136	Jklivemem
P54136_516	20	0	P54136	Jklivemem
P54577_341	20	7.60327	P54577	Jklivemem
P54578_195	20	NA	P54578	Jklivemem
P54578_417	20	NA	P54578	Jklivemem
P54886_288	20	NA	P54886	Jklivemem
P55010_52	20	6.3195	P55010	Jklivemem
P55010_74	20	NA	P55010	Jklivemem
P55060_282	20	8.81553	P55060	Jklivemem
P55060_369	20	0	P55060	Jklivemem
P55060_408	20	0	P55060	Jklivemem
P55265_587	20	0	P55265	Jklivemem
P55795_276	20	NA	P55795	Jklivemem
P55795_306	20	10.6038	P55795	Jklivemem
P55809_174	20	NA	P55809	Jklivemem
P56134_55	20	0	P56134	Jklivemem
P56192_201	20	0	P56192	Jklivemem
P60174_202	20	0	P60174	Jklivemem
P60709_362	20	4.57738	P60709	Jklivemem
P60709_91	20	0	P60709	Jklivemem
P60842_356	20	0	P60842	Jklivemem
P60842_391	20	NA	P60842	Jklivemem
P60953_72	20	NA	P60953	Jklivemem
P61020_82	20	NA	P61020	Jklivemem
P61158_202	20	0	P61158	Jklivemem
P61221_155	20	11.1278	P61221	Jklivemem
P61221_172	20	0	P61221	Jklivemem
P61221_411	20	0	P61221	Jklivemem
P61513_37	20	0	P61513	Jklivemem
P61927_27	20	NA	P61927	Jklivemem
P61978_225	20	11.4724	P61978	Jklivemem
P61978_230	20	NA	P61978	Jklivemem
P61978_323	20	8.38521	P61978	Jklivemem
P61978_380	20	0	P61978	Jklivemem
P61981_154	20	NA	P61981	Jklivemem
P61981_49	20	4.18607	P61981	Jklivemem
P62081_177	20	7.12273	P62081	Jklivemem
P62136_306	20	3.2785	P62136	Jklivemem
P62241_149	20	8.78843	P62241	Jklivemem
P62266_134	20	0	P62266	Jklivemem
P62277_38	20	8.18454	P62277	Jklivemem
P62424_102	20	0	P62424	Jklivemem
P62633_99	20	NA	P62633	Jklivemem
P62701_103	20	4.1229	P62701	Jklivemem
P62829_38	20	0	P62829	Jklivemem
P62834_159	20	1.09684	P62834	Jklivemem
P62841_97	20	0	P62841	Jklivemem
P62847_76	20	1.43955	P62847	Jklivemem
P62873_85	20	4.90427	P62873	Jklivemem
P62899_103	20	8.81782	P62899	Jklivemem
P62906_107	20	0.657759	P62906	Jklivemem
P62910_60	20	3.28411	P62910	Jklivemem
P63000_139	20	5.66931	P63000	Jklivemem
P63092_318	20	1.32911	P63092	Jklivemem
P63104_211	20	11.1032	P63104	Jklivemem
P63173_41	20	5.93796	P63173	Jklivemem
P63173_43	20	0	P63173	Jklivemem
P63244_194	20	8.91533	P63244	Jklivemem
P63244_228	20	0	P63244	Jklivemem
P68104_254	20	4.40625	P68104	Jklivemem
P68104_29	20	8.66199	P68104	Jklivemem
P68363_161	20	1.65432	P68363	Jklivemem
P68363_224	20	NA	P68363	Jklivemem
P68363_272	20	6.45032	P68363	Jklivemem
P68400_307	20	0	P68400	Jklivemem
P78347_373	20	NA	P78347	Jklivemem
P78417_139	20	0	P78417	Jklivemem
P78527_1411	20	0	P78527	Jklivemem
P78527_1920	20	NA	P78527	Jklivemem
P78527_3168	20	7.46497	P78527	Jklivemem
P78527_3475	20	0.4127	P78527	Jklivemem
P82675_137	20	NA	P82675	Jklivemem
P83731_55	20	0	P83731	Jklivemem
P84090_79	20	NA	P84090	Jklivemem
Q00610_184	20	NA	Q00610	Jklivemem
Q00610_510	20	0	Q00610	Jklivemem
Q00610_731	20	0	Q00610	Jklivemem
Q00839_266	20	0	Q00839	Jklivemem
Q00839_613	20	2.16105	Q00839	Jklivemem
Q00839_669	20	0	Q00839	Jklivemem
Q01081_158	20	0	Q01081	Jklivemem
Q01130_92	20	NA	Q01130	Jklivemem
Q01518_419	20	NA	Q01518	Jklivemem
Q01581_375	20	0	Q01581	Jklivemem
Q01780_419	20	NA	Q01780	Jklivemem
Q02790_113	20	NA	Q02790	Jklivemem
Q02878_282	20	6.32665	Q02878	Jklivemem
Q02880_157	20	NA	Q02880	Jklivemem
Q02978_102	20	NA	Q02978	Jklivemem
Q04637_958	20	0	Q04637	Jklivemem
Q07021_224	20	NA	Q07021	Jklivemem
Q07666_435	20	NA	Q07666	Jklivemem
Q08211_1155	20	7.41889	Q08211	Jklivemem
Q08211_1167	20	10.9776	Q08211	Jklivemem
Q08211_616	20	0	Q08211	Jklivemem
Q08211_748	20	7.13685	Q08211	Jklivemem
Q08431_252	20	0	Q08431	Jklivemem
Q08945_219	20	0	Q08945	Jklivemem
Q09028_181	20	NA	Q09028	Jklivemem
Q12874_11	20	2.72883	Q12874	Jklivemem
Q12906_891	20	0	Q12906	Jklivemem
Q13148_214	20	NA	Q13148	Jklivemem
Q13303_360	20	NA	Q13303	Jklivemem
Q13310_116	20	0	Q13310	Jklivemem
Q13347_300	20	0	Q13347	Jklivemem
Q13423_1084	20	0	Q13423	Jklivemem
Q13423_388	20	6.20337	Q13423	Jklivemem
Q13505_415	20	NA	Q13505	Jklivemem
Q13509_106	20	0	Q13509	Jklivemem
Q13547_72	20	0	Q13547	Jklivemem
Q13547_87	20	7.02363	Q13547	Jklivemem
Q13555_231	20	8.15666	Q13555	Jklivemem
Q13838_371	20	0.13257	Q13838	Jklivemem
Q14141_86	20	0	Q14141	Jklivemem
Q14152_499	20	6.59566	Q14152	Jklivemem
Q14166_473	20	0	Q14166	Jklivemem
Q14204_1990	20	0	Q14204	Jklivemem
Q14318_364	20	0	Q14318	Jklivemem
Q14498_293	20	5.48053	Q14498	Jklivemem
Q14558_98	20	NA	Q14558	Jklivemem
Q14566_276	20	0.108671	Q14566	Jklivemem
Q14566_46	20	8.57542	Q14566	Jklivemem
Q14566_575	20	0	Q14566	Jklivemem
Q14690_1353	20	3.44311	Q14690	Jklivemem
Q14696_166	20	NA	Q14696	Jklivemem
Q14697_341	20	0	Q14697	Jklivemem
Q14697_489	20	3.81212	Q14697	Jklivemem
Q14738_451	20	NA	Q14738	Jklivemem
Q14739_187	20	NA	Q14739	Jklivemem
Q14739_366	20	0	Q14739	Jklivemem
Q14839_1023	20	0	Q14839	Jklivemem
Q14839_1091	20	NA	Q14839	Jklivemem
Q14839_1322	20	0	Q14839	Jklivemem
Q14839_892	20	0	Q14839	Jklivemem
Q14974_321	20	5.17736	Q14974	Jklivemem
Q15022_557	20	NA	Q15022	Jklivemem
Q15052_644	20	NA	Q15052	Jklivemem
Q15233_267	20	0.813054	Q15233	Jklivemem
Q15262_831	20	0	Q15262	Jklivemem
Q15365_183	20	0	Q15365	Jklivemem
Q15366_182	20	0	Q15366	Jklivemem
Q15369_8	20	0	Q15369	Jklivemem
Q15424_449	20	0.611873	Q15424	Jklivemem
Q15436_705	20	5.28238	Q15436	Jklivemem
Q15437_707	20	0	Q15437	Jklivemem
Q15738_349	20	NA	Q15738	Jklivemem
Q16181_223	20	0	Q16181	Jklivemem
Q16576_153	20	6.3959	Q16576	Jklivemem
Q16629_115	20	0	Q16629	Jklivemem
Q16836_264	20	0	Q16836	Jklivemem
Q16891_95	20	0	Q16891	Jklivemem
Q1KMD3_668	20	0	Q1KMD3	Jklivemem
Q2TAY7_114	20	0	Q2TAY7	Jklivemem
Q3ZCQ8_225	20	1.36284	Q3ZCQ8	Jklivemem
Q4G176_401	20	1.23792	Q4G176	Jklivemem
Q5JRX3_76	20	NA	Q5JRX3	Jklivemem
Q5JWF2_961	20	1.32911	Q5JWF2	Jklivemem
Q5SSJ5_415	20	0	Q5SSJ5	Jklivemem
Q5ST30_357	20	8.24735	Q5ST30	Jklivemem
Q5TGZ0_72	20	0	Q5TGZ0	Jklivemem
Q5VTE0_254	20	4.40625	Q5VTE0	Jklivemem
Q5VTE0_29	20	8.66199	Q5VTE0	Jklivemem
Q5VZF2_233	20	6.28096	Q5VZF2	Jklivemem
Q5XKP0_112	20	0	Q5XKP0	Jklivemem
Q6NXR4_92	20	0	Q6NXR4	Jklivemem
Q6P2Q9_88	20	0.456788	Q6P2Q9	Jklivemem
Q6YP21_97	20	0	Q6YP21	Jklivemem
Q71U36_161	20	1.65432	Q71U36	Jklivemem
Q71U36_272	20	6.45032	Q71U36	Jklivemem
Q7L014_328	20	2.1772	Q7L014	Jklivemem
Q7L2H7_192	20	8.36165	Q7L2H7	Jklivemem
Q7Z6Z7_3424	20	NA	Q7Z6Z7	Jklivemem
Q86SK9_137	20	0	Q86SK9	Jklivemem
Q86UX7_162	20	11.309	Q86UX7	Jklivemem
Q86V81_77	20	0	Q86V81	Jklivemem
Q86WV6_274	20	0	Q86WV6	Jklivemem
Q8IWS0_105	20	NA	Q8IWS0	Jklivemem
Q8IWS0_195	20	0	Q8IWS0	Jklivemem
Q8IY81_16	20	4.3593	Q8IY81	Jklivemem
Q8N163_198	20	0	Q8N163	Jklivemem
Q8NBX0_105	20	6.38847	Q8NBX0	Jklivemem
Q8NEV1_307	20	0	Q8NEV1	Jklivemem
Q8NFI4_151	20	NA	Q8NFI4	Jklivemem
Q8NI36_801	20	0	Q8NI36	Jklivemem
Q8TAA3_161	20	0	Q8TAA3	Jklivemem
Q8TCJ2_588	20	0	Q8TCJ2	Jklivemem
Q8WUM4_29	20	NA	Q8WUM4	Jklivemem
Q8WUM4_39	20	NA	Q8WUM4	Jklivemem
Q8WXF1_255	20	NA	Q8WXF1	Jklivemem
Q92556_18	20	2.92466	Q92556	Jklivemem
Q92608_438	20	NA	Q92608	Jklivemem
Q92841_502	20	0	Q92841	Jklivemem
Q92841_519	20	6.80864	Q92841	Jklivemem
Q92945_317	20	0	Q92945	Jklivemem
Q969M3_42	20	0	Q969M3	Jklivemem
Q969X5_219	20	0	Q969X5	Jklivemem
Q969Z0_468	20	NA	Q969Z0	Jklivemem
Q96A33_293	20	NA	Q96A33	Jklivemem
Q96A33_388	20	NA	Q96A33	Jklivemem
Q96AG4_203	20	0	Q96AG4	Jklivemem
Q96CN7_160	20	NA	Q96CN7	Jklivemem
Q96F15_9	20	0	Q96F15	Jklivemem
Q96J01_34	20	NA	Q96J01	Jklivemem
Q96K37_111	20	0	Q96K37	Jklivemem
Q96KB5_100	20	NA	Q96KB5	Jklivemem
Q96ND0_231	20	11.3802	Q96ND0	Jklivemem
Q96PK6_226	20	9.29254	Q96PK6	Jklivemem
Q99832_111	20	NA	Q99832	Jklivemem
Q9BPW8_116	20	NA	Q9BPW8	Jklivemem
Q9BPW8_83	20	2.52326	Q9BPW8	Jklivemem
Q9BQ69_232	20	NA	Q9BQ69	Jklivemem
Q9BQE3_161	20	1.65432	Q9BQE3	Jklivemem
Q9BQE3_272	20	6.45032	Q9BQE3	Jklivemem
Q9BQG0_889	20	NA	Q9BQG0	Jklivemem
Q9BQG0_978	20	NA	Q9BQG0	Jklivemem
Q9BSJ8_518	20	0	Q9BSJ8	Jklivemem
Q9BUJ2_183	20	NA	Q9BUJ2	Jklivemem
Q9BUJ2_302	20	NA	Q9BUJ2	Jklivemem
Q9BUJ2_369	20	4.32307	Q9BUJ2	Jklivemem
Q9BUJ2_667	20	0	Q9BUJ2	Jklivemem
Q9BUN8_207	20	7.99377	Q9BUN8	Jklivemem
Q9BWF3_345	20	11.0632	Q9BWF3	Jklivemem
Q9BWF3_58	20	5.59824	Q9BWF3	Jklivemem
Q9BY44_182	20	8.85505	Q9BY44	Jklivemem
Q9BZE4_176	20	5.4097	Q9BZE4	Jklivemem
Q9BZF1_707	20	8.4823	Q9BZF1	Jklivemem
Q9H078_430	20	NA	Q9H078	Jklivemem
Q9H0U3_106	20	5.1978	Q9H0U3	Jklivemem
Q9H2P0_615	20	NA	Q9H2P0	Jklivemem
Q9H3N1_104	20	7.81788	Q9H3N1	Jklivemem
Q9H490_119	20	0	Q9H490	Jklivemem
Q9H9B4_73	20	10.8031	Q9H9B4	Jklivemem
Q9HAV7_102	20	NA	Q9HAV7	Jklivemem
Q9HB71_125	20	0	Q9HB71	Jklivemem
Q9HC21_59	20	11.3687	Q9HC21	Jklivemem
Q9HD45_76	20	0	Q9HD45	Jklivemem
Q9NPF4_76	20	NA	Q9NPF4	Jklivemem
Q9NQ88_208	20	NA	Q9NQ88	Jklivemem
Q9NQC3_1165	20	4.83127	Q9NQC3	Jklivemem
Q9NR30_221	20	3.533	Q9NR30	Jklivemem
Q9NR30_298	20	0	Q9NR30	Jklivemem
Q9NR56_236	20	6.28096	Q9NR56	Jklivemem
Q9NUB1_87	20	NA	Q9NUB1	Jklivemem
Q9NVI7_540	20	0	Q9NVI7	Jklivemem
Q9NX40_73	20	NA	Q9NX40	Jklivemem
Q9NX40_87	20	NA	Q9NX40	Jklivemem
Q9NX63_177	20	8.10817	Q9NX63	Jklivemem
Q9NXW2_345	20	9.68177	Q9NXW2	Jklivemem
Q9NYP7_92	20	NA	Q9NYP7	Jklivemem
Q9NZ01_44	20	2.39013	Q9NZ01	Jklivemem
Q9NZ01_77	20	6.56015	Q9NZ01	Jklivemem
Q9NZI8_206	20	0	Q9NZI8	Jklivemem
Q9P016_181	20	9.71386	Q9P016	Jklivemem
Q9P258_283	20	0	Q9P258	Jklivemem
Q9P258_420	20	0	Q9P258	Jklivemem
Q9P2J5_416	20	NA	Q9P2J5	Jklivemem
Q9P2J5_939	20	0	Q9P2J5	Jklivemem
Q9UBM7_468	20	6.74556	Q9UBM7	Jklivemem
Q9UBN7_728	20	NA	Q9UBN7	Jklivemem
Q9UBT2_159	20	10.1781	Q9UBT2	Jklivemem
Q9UGP8_131	20	9.9227	Q9UGP8	Jklivemem
Q9UHQ4_90	20	0	Q9UHQ4	Jklivemem
Q9UJA5_255	20	8.11912	Q9UJA5	Jklivemem
Q9UK45_54	20	0	Q9UK45	Jklivemem
Q9UK45_62	20	11.3605	Q9UK45	Jklivemem
Q9UKR5_127	20	5.12415	Q9UKR5	Jklivemem
Q9UL46_33	20	NA	Q9UL46	Jklivemem
Q9ULC4_124	20	NA	Q9ULC4	Jklivemem
Q9ULC4_88	20	NA	Q9ULC4	Jklivemem
Q9UPT9_389	20	0	Q9UPT9	Jklivemem
Q9UQ35_967	20	0	Q9UQ35	Jklivemem
Q9Y277_225	20	0	Q9Y277	Jklivemem
Q9Y285_310	20	0	Q9Y285	Jklivemem
Q9Y285_469	20	9.8907	Q9Y285	Jklivemem
Q9Y2R9_239	20	0	Q9Y2R9	Jklivemem
Q9Y2X3_338	20	NA	Q9Y2X3	Jklivemem
Q9Y320_199	20	8.52535	Q9Y320	Jklivemem
Q9Y320_261	20	0	Q9Y320	Jklivemem
Q9Y383_196	20	1.73428	Q9Y383	Jklivemem
Q9Y3D6_47	20	0	Q9Y3D6	Jklivemem
Q9Y3I0_5	20	0	Q9Y3I0	Jklivemem
Q9Y3U8_53	20	7.76337	Q9Y3U8	Jklivemem
Q9Y4L1_213	20	NA	Q9Y4L1	Jklivemem
Q9Y4L1_443	20	NA	Q9Y4L1	Jklivemem
Q9Y4L1_99	20	0	Q9Y4L1	Jklivemem
Q9Y512_172	20	11.3282	Q9Y512	Jklivemem
Q9Y580_219	20	0	Q9Y580	Jklivemem
Q9Y5B9_666	20	4.74631	Q9Y5B9	Jklivemem
Q9Y5B9_701	20	4.88296	Q9Y5B9	Jklivemem
Q9Y5Y5_166	20	NA	Q9Y5Y5	Jklivemem
Q9Y672_103	20	0	Q9Y672	Jklivemem
Q9Y673_127	20	NA	Q9Y673	Jklivemem
Q9Y6C9_95	20	8.60455	Q9Y6C9	Jklivemem
Q9Y6E2_64	20	NA	Q9Y6E2	Jklivemem
Q9UDW1_11	19.963	0.0523053	Q9UDW1	Jklivemem
O43776_499	19.8819	NA	O43776	Jklivemem
P68363_108	19.8605	2.63317	P68363	Jklivemem
Q71U36_108	19.8605	2.63317	Q71U36	Jklivemem
Q9BQE3_108	19.8605	2.63317	Q9BQE3	Jklivemem
P08559_227	19.7516	6.75836	P08559	Jklivemem
P54577_166	19.7487	0.290214	P54577	Jklivemem
P10809_503	19.738	0	P10809	Jklivemem
P14866_47	19.6809	0.451341	P14866	Jklivemem
Q9Y512_407	19.675	1.88182	Q9Y512	Jklivemem
Q9UBF2_697	19.6266	NA	Q9UBF2	Jklivemem
Q9Y285_305	19.6194	2.89725	Q9Y285	Jklivemem
P49591_444	19.6191	NA	P49591	Jklivemem
Q14558_101	19.5811	NA	Q14558	Jklivemem
Q5JTV8_379	19.5316	0.540844	Q5JTV8	Jklivemem
Q6YN16_55	19.5176	0.682262	Q6YN16	Jklivemem
O00571_580	19.499	0.708583	O00571	Jklivemem
O43390_136	19.4617	7.48224	O43390	Jklivemem
Q99798_432	19.4335	NA	Q99798	Jklivemem
P33993_33	19.4154	5.27821	P33993	Jklivemem
O94874_548	19.412	7.77271	O94874	Jklivemem
P39748_173	19.4094	0.681982	P39748	Jklivemem
Q9NSE4_993	19.391	5.48849	Q9NSE4	Jklivemem
Q9BPW8_87	19.3466	1.76666	Q9BPW8	Jklivemem
P46777_226	19.3225	9.15369	P46777	Jklivemem
P43243_520	19.3076	2.58798	P43243	Jklivemem
P08238_457	19.3023	2.6516	P08238	Jklivemem
O00154_194	19.2789	0.832697	O00154	Jklivemem
P08133_10	19.2387	10.1197	P08133	Jklivemem
P19338_402	19.2206	1.10224	P19338	Jklivemem
P51571_102	19.1896	1.73114	P51571	Jklivemem
P31943_82	19.1749	1.06295	P31943	Jklivemem
P27797_150	19.149	1.67109	P27797	Jklivemem
P08133_62	19.1316	1.22809	P08133	Jklivemem
P09669_56	19.1208	1.24335	P09669	Jklivemem
P84077_58	19.0319	NA	P84077	Jklivemem
P78527_2004	19.0179	0.656869	P78527	Jklivemem
Q6P1Q0_71	19.0108	1.39901	Q6P1Q0	Jklivemem
Q92841_147	18.982	5.85467	Q92841	Jklivemem
P30084_137	18.9551	0	P30084	Jklivemem
Q86UX7_11	18.9378	1.50219	Q86UX7	Jklivemem
P18621_47	18.9108	9.33081	P18621	Jklivemem
Q6P2Q9_756	18.909	1.54286	Q6P2Q9	Jklivemem
Q8NBX0_244	18.8619	1.37412	Q8NBX0	Jklivemem
P50570_231	18.8572	7.64701	P50570	Jklivemem
P46459_611	18.8424	1.63712	P46459	Jklivemem
Q13423_373	18.8416	1.63827	Q13423	Jklivemem
Q14331_116	18.8033	3.07962	Q14331	Jklivemem
P04075_302	18.7972	0	P04075	Jklivemem
Q16629_33	18.7738	6.02685	Q16629	Jklivemem
P60709_169	18.7666	5.38605	P60709	Jklivemem
P38919_155	18.7333	5.32369	P38919	Jklivemem
Q9P2J5_336	18.7096	4.05318	Q9P2J5	Jklivemem
P51991_145	18.7024	3.67618	P51991	Jklivemem
P09564_222	18.6222	1.94851	P09564	Jklivemem
P11021_127	18.563	NA	P11021	Jklivemem
P06576_247	18.5027	2.70057	P06576	Jklivemem
Q9NZ01_4	18.4154	5.13303	Q9NZ01	Jklivemem
P54577_123	18.3627	1.89063	P54577	Jklivemem
Q9NR31_89	18.3578	0	Q9NR31	Jklivemem
Q9UPN6_64	18.346	NA	Q9UPN6	Jklivemem
P23246_602	18.3365	1.92084	P23246	Jklivemem
P56385_30	18.3358	8.36925	P56385	Jklivemem
P14866_565	18.2951	8.62486	P14866	Jklivemem
P41252_369	18.2584	10.1896	P41252	Jklivemem
P62750_144	18.2452	2.02628	P62750	Jklivemem
P55209_96	18.2358	7.62188	P55209	Jklivemem
P08133_439	18.2244	7.11612	P08133	Jklivemem
P62424_230	18.2068	1.93373	P62424	Jklivemem
Q99832_275	18.1975	NA	Q99832	Jklivemem
P54886_608	18.1724	8.40349	P54886	Jklivemem
P60709_188	18.17	NA	P60709	Jklivemem
Q9BQ69_216	18.1192	1.3228	Q9BQ69	Jklivemem
Q99442_102	18.1087	2.18383	Q99442	Jklivemem
Q9Y3B4_36	18.0903	4.88632	Q9Y3B4	Jklivemem
Q15717_200	17.9961	2.83397	Q15717	Jklivemem
P36578_277	17.9804	2.83174	P36578	Jklivemem
O95163_1182	17.9644	2.87878	O95163	Jklivemem
P17252_195	17.934	2.71997	P17252	Jklivemem
Q7KZF4_217	17.9288	NA	Q7KZF4	Jklivemem
O94776_437	17.9276	2.93088	O94776	Jklivemem
P39748_152	17.9227	0	P39748	Jklivemem
P26038_134	17.9097	2.95607	P26038	Jklivemem
P14866_257	17.9061	6.9018	P14866	Jklivemem
Q9Y673_74	17.8742	3.00634	Q9Y673	Jklivemem
P31939_104	17.8039	3.13872	P31939	Jklivemem
P61247_155	17.7822	3.10015	P61247	Jklivemem
P55084_331	17.767	3.15791	P55084	Jklivemem
Q92688_131	17.723	8.23978	Q92688	Jklivemem
Q16891_81	17.6982	7.28176	Q16891	Jklivemem
P12236_251	17.6515	2.84382	P12236	Jklivemem
O00303_106	17.6512	3.32165	O00303	Jklivemem
Q1KMD3_334	17.6496	2.71406	Q1KMD3	Jklivemem
Q8IWS0_103	17.6156	10.2962	Q8IWS0	Jklivemem
Q9Y5S9_54	17.5883	4.85072	Q9Y5S9	Jklivemem
Q16576_180	17.5688	NA	Q16576	Jklivemem
P46777_49	17.5507	NA	P46777	Jklivemem
O14672_741	17.5501	3.46465	O14672	Jklivemem
Q9Y2R9_126	17.5014	NA	Q9Y2R9	Jklivemem
P62847_81	17.48	NA	P62847	Jklivemem
P61160_91	17.461	8.22627	P61160	Jklivemem
O94874_249	17.4608	3.59097	O94874	Jklivemem
P05388_13	17.4596	3.5111	P05388	Jklivemem
Q16629_7	17.4234	9.89776	Q16629	Jklivemem
P40121_116	17.4071	6.6281	P40121	Jklivemem
P51991_360	17.4041	4.79496	P51991	Jklivemem
Q9Y2X3_217	17.3829	5.76936	Q9Y2X3	Jklivemem
Q9Y4L1_487	17.379	8.47528	Q9Y4L1	Jklivemem
P12004_133	17.3761	0	P12004	Jklivemem
P08133_572	17.3719	NA	P08133	Jklivemem
P41240_97	17.3342	3.77	P41240	Jklivemem
P0DMV8_107	17.312	NA	P0DMV8	Jklivemem
O15371_263	17.2899	NA	O15371	Jklivemem
Q14103_244	17.2406	1.66203	Q14103	Jklivemem
Q8IY81_241	17.2149	3.94489	Q8IY81	Jklivemem
O95167_41	17.1982	6.27377	O95167	Jklivemem
P31689_33	17.1793	3.25706	P31689	Jklivemem
P52565_133	17.1573	6.41712	P52565	Jklivemem
P46782_48	17.1315	3.55765	P46782	Jklivemem
P62263_72	17.0792	6.52351	P62263	Jklivemem
P60900_107	17.0592	4.15893	P60900	Jklivemem
P43403_164	17.0499	4.83252	P43403	Jklivemem
P42704_586	17.0206	0	P42704	Jklivemem
P14625_480	17.0117	NA	P14625	Jklivemem
P15153_139	16.9842	NA	P15153	Jklivemem
P06576_230	16.9689	NA	P06576	Jklivemem
P11142_134	16.9663	NA	P11142	Jklivemem
O15382_234	16.9616	NA	O15382	Jklivemem
Q9BZF1_484	16.9381	4.33021	Q9BZF1	Jklivemem
O43143_127	16.928	3.15878	O43143	Jklivemem
P62424_181	16.9074	3.92135	P62424	Jklivemem
O00410_940	16.8938	NA	O00410	Jklivemem
Q5BKZ1_136	16.8908	2.51147	Q5BKZ1	Jklivemem
Q9P2J5_916	16.881	4.41087	Q9P2J5	Jklivemem
Q08211_568	16.8431	4.46454	Q08211	Jklivemem
P48735_285	16.8378	6.43601	P48735	Jklivemem
P49591_220	16.8139	NA	P49591	Jklivemem
P25705_489	16.8104	7.22067	P25705	Jklivemem
Q9NZ01_117	16.8079	2.89364	Q9NZ01	Jklivemem
Q14739_589	16.7819	4.55113	Q14739	Jklivemem
P23368_231	16.7673	NA	P23368	Jklivemem
O00567_371	16.7438	2.2591	O00567	Jklivemem
P07437_50	16.7193	NA	P07437	Jklivemem
Q7KZF4_682	16.7156	NA	Q7KZF4	Jklivemem
P43243_128	16.7152	10.0524	P43243	Jklivemem
Q99832_438	16.6995	NA	Q99832	Jklivemem
Q8N1F7_801	16.6616	4.01092	Q8N1F7	Jklivemem
Q02880_172	16.6553	0	Q02880	Jklivemem
O94906_732	16.6167	9.07557	O94906	Jklivemem
P23528_140	16.5816	NA	P23528	Jklivemem
Q86VR2_233	16.571	1.4535	Q86VR2	Jklivemem
Q9BWF3_190	16.5689	3.05603	Q9BWF3	Jklivemem
Q8N1G4_335	16.5677	4.13689	Q8N1G4	Jklivemem
Q99755_77	16.5644	4.85869	Q99755	Jklivemem
P04818_135	16.5471	4.88308	P04818	Jklivemem
P07900_61	16.5318	NA	P07900	Jklivemem
P06239_209	16.5179	10.4274	P06239	Jklivemem
O60610_209	16.5089	4.9372	O60610	Jklivemem
P52597_276	16.4829	4.97395	P52597	Jklivemem
P78527_1437	16.4746	4.07073	P78527	Jklivemem
Q00610_417	16.4462	7.38932	Q00610	Jklivemem
P14866_375	16.4385	5.03677	P14866	Jklivemem
P30519_154	16.423	3.67958	P30519	Jklivemem
P42229_694	16.4218	5.06036	P42229	Jklivemem
Q5SSJ5_278	16.4161	3.38457	Q5SSJ5	Jklivemem
Q14839_1093	16.3763	NA	Q14839	Jklivemem
P26599_267	16.3743	4.18658	P26599	Jklivemem
Q9UKM9_57	16.3531	3.24868	Q9UKM9	Jklivemem
Q5VTE0_162	16.3491	5.16314	Q5VTE0	Jklivemem
Q9NVP1_590	16.3003	4.27205	Q9NVP1	Jklivemem
P62937_79	16.2971	NA	P62937	Jklivemem
Q9NSE4_60	16.2895	6.60559	Q9NSE4	Jklivemem
P19338_473	16.2866	1.21245	P19338	Jklivemem
P22626_336	16.2514	4.45395	P22626	Jklivemem
P28838_494	16.2407	7.77876	P28838	Jklivemem
Q14974_529	16.2084	9.40486	Q14974	Jklivemem
P50402_161	16.2079	10.2801	P50402	Jklivemem
P14618_466	16.1726	1.04537	P14618	Jklivemem
Q15392_300	16.149	0.214381	Q15392	Jklivemem
Q99798_390	16.1339	0	Q99798	Jklivemem
P25398_61	16.1305	5.4723	P25398	Jklivemem
P68363_399	16.1054	0.420396	P68363	Jklivemem
Q71U36_399	16.1054	0.420396	Q71U36	Jklivemem
Q9BQE3_399	16.1054	0.420396	Q9BQE3	Jklivemem
P60709_53	16.1011	1.73137	P60709	Jklivemem
Q9Y4W6_689	16.0928	9.34788	Q9Y4W6	Jklivemem
Q96A72_53	16.0693	6.30594	Q96A72	Jklivemem
P18669_142	16.0565	NA	P18669	Jklivemem
B0I1T2_548	16.0477	6.32003	B0I1T2	Jklivemem
Q969X5_196	16.0406	3.7553	Q969X5	Jklivemem
P33993_345	16.0159	5.22529	P33993	Jklivemem
P33176_274	16.0027	0	P33176	Jklivemem
O76003_302	15.9656	6.63538	O76003	Jklivemem
Q1KMD3_740	15.9611	9.02099	Q1KMD3	Jklivemem
P67775_130	15.9574	NA	P67775	Jklivemem
Q96A57_29	15.9556	5.71958	Q96A57	Jklivemem
Q15029_161	15.9489	NA	Q15029	Jklivemem
P18621_4	15.9321	4.58978	P18621	Jklivemem
P53396_1006	15.9242	4.9172	P53396	Jklivemem
Q14566_174	15.8966	4.73818	Q14566	Jklivemem
P52565_144	15.8948	5.80569	P52565	Jklivemem
P12956_530	15.8625	1.48101	P12956	Jklivemem
Q4G176_544	15.8406	8.66152	Q4G176	Jklivemem
P40429_149	15.8367	8.29558	P40429	Jklivemem
P23396_34	15.8326	4.83931	P23396	Jklivemem
P28482_263	15.8308	NA	P28482	Jklivemem
P10768_49	15.8239	NA	P10768	Jklivemem
P78527_2743	15.809	5.92691	P78527	Jklivemem
P11388_82	15.8076	NA	P11388	Jklivemem
P08238_276	15.7914	NA	P08238	Jklivemem
P49790_29	15.7879	4.86371	P49790	Jklivemem
O95197_1004	15.7596	3.90692	O95197	Jklivemem
O14929_263	15.727	2.90618	O14929	Jklivemem
O43776_539	15.724	0	O43776	Jklivemem
P35579_650	15.7166	11.1397	P35579	Jklivemem
Q9GZS3_162	15.7026	NA	Q9GZS3	Jklivemem
P23528_82	15.6923	3.48235	P23528	Jklivemem
P40121_109	15.6863	4.75302	P40121	Jklivemem
Q02543_110	15.6766	4.76915	Q02543	Jklivemem
Q14697_509	15.6488	0	Q14697	Jklivemem
P61158_245	15.6106	5.06844	P61158	Jklivemem
Q16666_334	15.6049	NA	Q16666	Jklivemem
P50995_279	15.5927	6.23285	P50995	Jklivemem
P25705_343	15.5743	3.69865	P25705	Jklivemem
Q13148_123	15.5622	NA	Q13148	Jklivemem
P22626_41	15.5417	NA	P22626	Jklivemem
Q15046_231	15.5198	NA	Q15046	Jklivemem
Q9Y230_442	15.5072	8.03885	Q9Y230	Jklivemem
P31943_306	15.5064	6.94811	P31943	Jklivemem
O75390_345	15.4658	NA	O75390	Jklivemem
P15880_223	15.4622	2.48293	P15880	Jklivemem
P19338_462	15.4523	5.2512	P19338	Jklivemem
P78527_2965	15.4298	6.46319	P78527	Jklivemem
P13010_333	15.4214	7.44396	P13010	Jklivemem
P26038_85	15.419	NA	P26038	Jklivemem
P00414_67	15.4023	7.39073	P00414	Jklivemem
P53007_92	15.3923	6.51621	P53007	Jklivemem
O43143_499	15.3779	5.05525	O43143	Jklivemem
Q92504_320	15.3533	0	Q92504	Jklivemem
P61513_18	15.3511	8.16766	P61513	Jklivemem
P52566_125	15.3331	2.84434	P52566	Jklivemem
O95202_598	15.3266	6.16687	O95202	Jklivemem
P52597_246	15.3266	6.08676	P52597	Jklivemem
Q9UQ80_309	15.3178	8.05849	Q9UQ80	Jklivemem
P30153_495	15.3168	9.56525	P30153	Jklivemem
P06576_431	15.3023	NA	P06576	Jklivemem
P27824_214	15.2887	1.88468	P27824	Jklivemem
O60814_122	15.2879	NA	O60814	Jklivemem
P27797_308	15.2822	6.67197	P27797	Jklivemem
Q14498_475	15.2782	5.4523	Q14498	Jklivemem
P06400_424	15.2557	NA	P06400	Jklivemem
P55769_11	15.2516	NA	P55769	Jklivemem
O00567_210	15.2314	3.33268	O00567	Jklivemem
B0I1T2_205	15.2293	6.0415	B0I1T2	Jklivemem
P47897_422	15.2152	6.43815	P47897	Jklivemem
Q9UHD8_278	15.2089	NA	Q9UHD8	Jklivemem
P49368_232	15.2081	6.77675	P49368	Jklivemem
P48735_274	15.2031	6.99778	P48735	Jklivemem
P68104_183	15.2013	NA	P68104	Jklivemem
P13639_443	15.1956	7.5972	P13639	Jklivemem
O43143_254	15.1354	4.14353	O43143	Jklivemem
Q9NX63_53	15.1219	1.74693	Q9NX63	Jklivemem
P36915_446	15.1081	NA	P36915	Jklivemem
P61158_184	15.1055	NA	P61158	Jklivemem
Q09028_21	15.0985	4.34208	Q09028	Jklivemem
Q16576_20	15.0985	4.34208	Q16576	Jklivemem
P45880_78	15.068	3.65337	P45880	Jklivemem
Q04837_109	15.0658	NA	Q04837	Jklivemem
Q13263_208	15.044	5.17589	Q13263	Jklivemem
P14868_389	14.9934	NA	P14868	Jklivemem
P24666_50	14.9649	NA	P24666	Jklivemem
Q9BPW8_148	14.9585	NA	Q9BPW8	Jklivemem
Q00610_1451	14.9073	6.98718	Q00610	Jklivemem
Q8NBX0_202	14.9044	5.71772	Q8NBX0	Jklivemem
P25685_256	14.9038	7.20717	P25685	Jklivemem
P51532_1379	14.8942	7.22072	P51532	Jklivemem
P68104_141	14.8729	5.74149	P68104	Jklivemem
Q5VTE0_141	14.8729	5.74149	Q5VTE0	Jklivemem
Q6DD88_377	14.8556	7.27523	Q6DD88	Jklivemem
P49736_726	14.8542	5.15801	P49736	Jklivemem
P05141_95	14.831	3.02819	P05141	Jklivemem
Q99986_107	14.8185	5.75659	Q99986	Jklivemem
Q52LJ0_147	14.8089	NA	Q52LJ0	Jklivemem
P51572_73	14.8088	9.45599	P51572	Jklivemem
P06576_418	14.7919	4.76458	P06576	Jklivemem
P06733_189	14.7885	3.79934	P06733	Jklivemem
P27824_100	14.7457	4.76567	P27824	Jklivemem
P62136_137	14.7425	5.80572	P62136	Jklivemem
P62140_136	14.7425	5.80572	P62140	Jklivemem
P12268_509	14.7413	NA	P12268	Jklivemem
P11172_16	14.73	NA	P11172	Jklivemem
Q6NUK1_328	14.7273	3.52172	Q6NUK1	Jklivemem
P14618_148	14.7171	7.41216	P14618	Jklivemem
P43243_794	14.6963	7.50051	P43243	Jklivemem
Q9UQ80_98	14.6919	NA	Q9UQ80	Jklivemem
P50990_436	14.688	7.51237	P50990	Jklivemem
P48047_35	14.6845	4.71734	P48047	Jklivemem
P36578_122	14.6709	3.4753	P36578	Jklivemem
Q08211_370	14.6661	3.85145	Q08211	Jklivemem
Q9H2U2_142	14.6641	NA	Q9H2U2	Jklivemem
P25398_127	14.6397	4.08082	P25398	Jklivemem
Q9NVP1_573	14.6153	8.43815	Q9NVP1	Jklivemem
Q9Y5B9_811	14.6051	6.61755	Q9Y5B9	Jklivemem
P14868_394	14.5793	6.86957	P14868	Jklivemem
P18124_82	14.578	NA	P18124	Jklivemem
P17812_354	14.5722	NA	P17812	Jklivemem
P18669_119	14.5626	9.20611	P18669	Jklivemem
P07814_1269	14.5525	7.70394	P07814	Jklivemem
P27824_70	14.5229	NA	P27824	Jklivemem
P53007_84	14.5204	4.79197	P53007	Jklivemem
O75521_111	14.498	3.24125	O75521	Jklivemem
P25705_291	14.494	NA	P25705	Jklivemem
Q9BUJ2_502	14.481	1.80797	Q9BUJ2	Jklivemem
P11388_481	14.4722	5.97515	P11388	Jklivemem
P21796_62	14.4322	3.78282	P21796	Jklivemem
P00387_151	14.3977	3.06447	P00387	Jklivemem
Q04917_133	14.3411	8.00287	Q04917	Jklivemem
P38646_161	14.336	9.51696	P38646	Jklivemem
P11142_107	14.3316	3.39122	P11142	Jklivemem
Q9Y5B9_893	14.3226	0.528453	Q9Y5B9	Jklivemem
O43813_21	14.2977	8.06429	O43813	Jklivemem
P10809_90	14.2947	NA	P10809	Jklivemem
Q96KA5_209	14.278	6.5214	Q96KA5	Jklivemem
P39656_385	14.2698	6.93159	P39656	Jklivemem
P26368_463	14.2622	NA	P26368	Jklivemem
P68104_418	14.2509	5.13774	P68104	Jklivemem
P60709_218	14.2489	4.60066	P60709	Jklivemem
Q9BPW8_104	14.2416	NA	Q9BPW8	Jklivemem
O15355_160	14.2377	1.99316	O15355	Jklivemem
Q99986_317	14.2375	8.14936	Q99986	Jklivemem
P17844_497	14.226	8.16566	P17844	Jklivemem
P31943_276	14.2134	NA	P31943	Jklivemem
Q96ME7_304	14.201	8.20101	Q96ME7	Jklivemem
P31146_283	14.1683	NA	P31146	Jklivemem
P11387_308	14.1666	8.24969	P11387	Jklivemem
O00299_233	14.1514	NA	O00299	Jklivemem
P31153_235	14.1402	5.75886	P31153	Jklivemem
P06493_270	14.1328	4.12201	P06493	Jklivemem
O00299_93	14.1265	7.33739	O00299	Jklivemem
Q9BSJ8_121	14.1185	7.93776	Q9BSJ8	Jklivemem
P08238_56	14.1153	NA	P08238	Jklivemem
P07766_188	14.0764	2.53101	P07766	Jklivemem
P84090_19	14.07	8.38636	P84090	Jklivemem
Q9HB71_90	14.0686	8.38833	Q9HB71	Jklivemem
P40429_54	14.0491	NA	P40429	Jklivemem
Q9P2J5_156	14.048	3.18123	Q9P2J5	Jklivemem
Q13148_77	14.0195	NA	Q13148	Jklivemem
Q09161_64	13.9692	0	Q09161	Jklivemem
O43390_177	13.9692	4.34834	O43390	Jklivemem
P49756_755	13.9624	0	P49756	Jklivemem
P22314_388	13.9616	5.30686	P22314	Jklivemem
P32969_180	13.9521	3.58714	P32969	Jklivemem
P12956_559	13.9501	2.23111	P12956	Jklivemem
P21796_146	13.9199	8.13371	P21796	Jklivemem
P43243_158	13.8953	4.2406	P43243	Jklivemem
P42766_78	13.8942	0.830132	P42766	Jklivemem
P23258_82	13.8679	6.03578	P23258	Jklivemem
Q9NRH3_82	13.8679	6.03578	Q9NRH3	Jklivemem
P04406_255	13.8406	5.24133	P04406	Jklivemem
P52597_210	13.8263	6.62234	P52597	Jklivemem
P62701_121	13.8256	0	P62701	Jklivemem
Q10471_408	13.8233	5.72111	Q10471	Jklivemem
P27824_514	13.8143	NA	P27824	Jklivemem
P18858_823	13.8129	4.79293	P18858	Jklivemem
P31946_106	13.8127	NA	P31946	Jklivemem
P50990_308	13.8105	NA	P50990	Jklivemem
Q14683_186	13.7851	8.78918	Q14683	Jklivemem
P53396_692	13.7829	8.05022	P53396	Jklivemem
P46777_183	13.7754	7.63884	P46777	Jklivemem
Q9BQE3_282	13.7714	4.24144	Q9BQE3	Jklivemem
Q99986_187	13.7644	6.10889	Q99986	Jklivemem
Q08211_902	13.7338	0.939231	Q08211	Jklivemem
P13639_434	13.7173	4.77432	P13639	Jklivemem
O95169_90	13.6977	3.08062	O95169	Jklivemem
O95299_38	13.6941	8.91795	O95299	Jklivemem
O94925_249	13.6901	8.92357	O94925	Jklivemem
Q9BUJ2_390	13.6869	0	Q9BUJ2	Jklivemem
P61978_280	13.6781	1.15755	P61978	Jklivemem
P68371_51	13.6768	8.47492	P68371	Jklivemem
P52597_253	13.6721	8.94903	P52597	Jklivemem
Q08211_274	13.6653	8.95864	Q08211	Jklivemem
Q53EL6_423	13.6479	8.98316	Q53EL6	Jklivemem
Q8IWS0_301	13.645	NA	Q8IWS0	Jklivemem
Q16777_58	13.636	NA	Q16777	Jklivemem
P62913_170	13.5941	4.90708	P62913	Jklivemem
P40926_56	13.5585	5.37511	P40926	Jklivemem
P62277_89	13.5579	NA	P62277	Jklivemem
Q9BPW8_132	13.552	4.40216	Q9BPW8	Jklivemem
P22626_40	13.5514	NA	P22626	Jklivemem
P14625_667	13.5282	6.62184	P14625	Jklivemem
P18077_14	13.5126	NA	P18077	Jklivemem
Q99832_232	13.5055	6.02057	Q99832	Jklivemem
Q7L0Y3_214	13.4698	NA	Q7L0Y3	Jklivemem
P60709_166	13.4596	3.6916	P60709	Jklivemem
Q9NR31_154	13.4243	5.74201	Q9NR31	Jklivemem
P38919_361	13.4175	7.61461	P38919	Jklivemem
P42167_394	13.413	0.358691	P42167	Jklivemem
P11310_158	13.4067	9.32437	P11310	Jklivemem
P51149_144	13.3965	8.46631	P51149	Jklivemem
P23246_320	13.3954	NA	P23246	Jklivemem
P33176_228	13.3836	8.28305	P33176	Jklivemem
P61221_573	13.3693	0	P61221	Jklivemem
P42677_31	13.3597	4.72937	P42677	Jklivemem
P07437_310	13.3338	NA	P07437	Jklivemem
P11021_160	13.3301	NA	P11021	Jklivemem
P53007_181	13.3185	5.41372	P53007	Jklivemem
P62701_149	13.2976	1.39206	P62701	Jklivemem
P60709_306	13.2896	NA	P60709	Jklivemem
P28288_525	13.27	9.51768	P28288	Jklivemem
P43487_103	13.2692	9.51875	P43487	Jklivemem
O00567_152	13.2474	5.94021	O00567	Jklivemem
Q9Y3I0_306	13.2417	4.08587	Q9Y3I0	Jklivemem
P33316_167	13.2298	9.57452	P33316	Jklivemem
P49916_666	13.2238	9.06501	P49916	Jklivemem
Q9UBM7_382	13.221	NA	Q9UBM7	Jklivemem
P63241_69	13.2191	2.49253	P63241	Jklivemem
Q8NBX0_237	13.2153	6.06126	Q8NBX0	Jklivemem
P61247_205	13.2079	3.90341	P61247	Jklivemem
P68104_177	13.2001	7.38857	P68104	Jklivemem
Q5VTE0_177	13.2001	7.38857	Q5VTE0	Jklivemem
Q9UGP8_149	13.1977	9.61988	Q9UGP8	Jklivemem
P38646_128	13.1936	1.59099	P38646	Jklivemem
Q14697_664	13.1862	NA	Q14697	Jklivemem
O15371_335	13.1764	9.64996	O15371	Jklivemem
P34897_106	13.1684	NA	P34897	Jklivemem
P22314_471	13.1558	6.27288	P22314	Jklivemem
P61586_66	13.1551	2.27741	P61586	Jklivemem
P11586_852	13.1272	6.77936	P11586	Jklivemem
Q9UBQ7_255	13.1134	NA	Q9UBQ7	Jklivemem
Q92841_75	13.1061	9.74938	Q92841	Jklivemem
P18583_942	13.106	3.24554	P18583	Jklivemem
Q9HD45_122	13.0976	3.49914	Q9HD45	Jklivemem
P61254_74	13.0901	NA	P61254	Jklivemem
P06576_508	13.0873	NA	P06576	Jklivemem
P06744_351	13.0834	7.69091	P06744	Jklivemem
P60842_197	13.0694	4.83083	P60842	Jklivemem
P17844_190	13.0612	0	P17844	Jklivemem
Q15181_94	13.0484	0	Q15181	Jklivemem
Q3ZCQ8_62	13.0411	NA	Q3ZCQ8	Jklivemem
Q9H2P0_764	13.0327	8.04513	Q9H2P0	Jklivemem
P41252_618	13.0296	8.66685	P41252	Jklivemem
P11388_151	13.0168	3.43962	P11388	Jklivemem
P68363_103	13.012	5.60186	P68363	Jklivemem
Q71U36_103	13.012	5.60186	Q71U36	Jklivemem
Q9BQE3_103	13.012	5.60186	Q9BQE3	Jklivemem
Q99536_330	12.9958	8.05758	Q99536	Jklivemem
P31943_249	12.9892	3.03931	P31943	Jklivemem
Q00839_327	12.9888	4.19793	Q00839	Jklivemem
P62847_97	12.9887	6.30946	P62847	Jklivemem
P62826_39	12.9714	4.08858	P62826	Jklivemem
P14625_652	12.9585	8.13082	P14625	Jklivemem
P46777_44	12.9561	2.94113	P46777	Jklivemem
Q9H9B4_151	12.9514	0	Q9H9B4	Jklivemem
Q16401_440	12.9437	1.65954	Q16401	Jklivemem
Q96K37_394	12.9412	9.98259	Q96K37	Jklivemem
P07437_340	12.9403	NA	P07437	Jklivemem
Q00610_430	12.9342	8.92631	Q00610	Jklivemem
P08238_596	12.9293	2.2747	P08238	Jklivemem
P20963_142	12.925	7.22254	P20963	Jklivemem
P61978_72	12.9169	0.65521	P61978	Jklivemem
P07814_1504	12.8903	7.83392	P07814	Jklivemem
P18124_57	12.8671	1.94349	P18124	Jklivemem
P26599_430	12.8639	7.08837	P26599	Jklivemem
P36915_432	12.8439	NA	P36915	Jklivemem
P61247_31	12.8393	4.99486	P61247	Jklivemem
O15042_158	12.8202	5.4826	O15042	Jklivemem
P62910_95	12.7995	4.73817	P62910	Jklivemem
O15260_24	12.7783	6.27779	O15260	Jklivemem
P60981_82	12.7697	4.2053	P60981	Jklivemem
P26641_416	12.7614	8.84977	P26641	Jklivemem
Q9UBX3_149	12.7524	2.11539	Q9UBX3	Jklivemem
Q7KZF4_796	12.7337	NA	Q7KZF4	Jklivemem
P07900_627	12.7249	2.50575	P07900	Jklivemem
P22626_331	12.7214	0.414703	P22626	Jklivemem
P06576_292	12.7016	NA	P06576	Jklivemem
Q9Y262_247	12.6817	7.55772	Q9Y262	Jklivemem
P04075_138	12.6676	9.68343	P04075	Jklivemem
P04406_94	12.6669	NA	P04406	Jklivemem
Q9H2U2_88	12.6648	NA	Q9H2U2	Jklivemem
Q92841_238	12.6632	8.18102	Q92841	Jklivemem
P49588_258	12.6612	7.67134	P49588	Jklivemem
O14979_314	12.6606	5.55133	O14979	Jklivemem
Q13423_933	12.6369	NA	Q13423	Jklivemem
P39748_268	12.6322	7.42059	P39748	Jklivemem
P14868_239	12.6281	4.94416	P14868	Jklivemem
Q9P2J5_666	12.6272	6.89119	Q9P2J5	Jklivemem
Q9H300_74	12.6261	NA	Q9H300	Jklivemem
O75915_182	12.6238	NA	O75915	Jklivemem
P62913_92	12.6112	3.90715	P62913	Jklivemem
P07237_99	12.6051	6.86787	P07237	Jklivemem
Q96JJ7_99	12.6051	6.86787	Q96JJ7	Jklivemem
P68363_282	12.5972	NA	P68363	Jklivemem
P48556_225	12.5947	5.56955	P48556	Jklivemem
P33993_297	12.59	10.4793	P33993	Jklivemem
Q9NQG5_117	12.5897	10.4797	Q9NQG5	Jklivemem
Q9NTJ5_272	12.584	0.492514	Q9NTJ5	Jklivemem
P25205_251	12.5771	NA	P25205	Jklivemem
P60709_294	12.5646	NA	P60709	Jklivemem
Q14697_60	12.564	0	Q14697	Jklivemem
Q04446_200	12.5635	0	Q04446	Jklivemem
Q96DI7_249	12.5574	NA	Q96DI7	Jklivemem
Q9NR30_434	12.5508	5.49732	Q9NR30	Jklivemem
P62269_40	12.545	7.07063	P62269	Jklivemem
P52566_172	12.5411	8.98939	P52566	Jklivemem
Q9Y5B9_764	12.5308	10.563	Q9Y5B9	Jklivemem
O00116_645	12.5282	5.61754	O00116	Jklivemem
Q14566_418	12.5263	7.0868	Q14566	Jklivemem
Q99798_151	12.5189	NA	Q99798	Jklivemem
O43837_366	12.5069	4.90871	O43837	Jklivemem
P62241_198	12.4935	NA	P62241	Jklivemem
P36578_184	12.4909	5.77332	P36578	Jklivemem
P08238_520	12.4688	6.19908	P08238	Jklivemem
Q14566_510	12.4542	6.79575	Q14566	Jklivemem
Q14566_567	12.4535	10.7849	Q14566	Jklivemem
Q9HB71_181	12.4517	6.38585	Q9HB71	Jklivemem
Q5SSJ5_284	12.4419	0	Q5SSJ5	Jklivemem
P62937_48	12.4334	2.27573	P62937	Jklivemem
Q00610_754	12.4296	NA	Q00610	Jklivemem
P22314_451	12.421	1.40363	P22314	Jklivemem
P00558_76	12.4148	0.428295	P00558	Jklivemem
P18077_34	12.4122	NA	P18077	Jklivemem
P27797_172	12.4086	NA	P27797	Jklivemem
O75083_398	12.4068	6.18765	O75083	Jklivemem
P15880_248	12.399	5.61575	P15880	Jklivemem
O96000_26	12.3948	8.40933	O96000	Jklivemem
P28331_636	12.3833	9.71344	P28331	Jklivemem
P33993_539	12.3829	8.79544	P33993	Jklivemem
P49588_266	12.382	NA	P49588	Jklivemem
Q9P2J5_275	12.3551	NA	Q9P2J5	Jklivemem
Q14697_498	12.3546	8.05523	Q14697	Jklivemem
Q96A26_55	12.3522	9.64118	Q96A26	Jklivemem
Q13263_755	12.3385	0.62834	Q13263	Jklivemem
Q08211_68	12.3365	6.44974	Q08211	Jklivemem
Q13310_364	12.3336	3.35612	Q13310	Jklivemem
O43809_24	12.3153	7.25909	O43809	Jklivemem
O14880_40	12.3136	NA	O14880	Jklivemem
P24539_56	12.2975	4.44702	P24539	Jklivemem
Q04446_41	12.2939	NA	Q04446	Jklivemem
P61158_72	12.2923	0	P61158	Jklivemem
Q06830_34	12.2749	NA	Q06830	Jklivemem
P17812_265	12.2637	9.34155	P17812	Jklivemem
O75521_169	12.255	10.9531	O75521	Jklivemem
P40429_137	12.215	0.885967	P40429	Jklivemem
Q99832_358	12.1944	4.91189	Q99832	Jklivemem
P37268_346	12.1934	7.55178	P37268	Jklivemem
Q99536_100	12.1817	1.19278	Q99536	Jklivemem
P33993_6	12.1793	1.21948	P33993	Jklivemem
P52597_240	12.1761	NA	P52597	Jklivemem
Q8IUX7_733	12.176	11.0648	Q8IUX7	Jklivemem
Q99832_302	12.176	NA	Q99832	Jklivemem
Q10471_99	12.1595	6.50182	Q10471	Jklivemem
P12956_409	12.1564	NA	P12956	Jklivemem
P42704_477	12.1539	11.096	P42704	Jklivemem
Q8WTT2_700	12.146	11.1072	Q8WTT2	Jklivemem
P10768_67	12.1376	11.1192	P10768	Jklivemem
P19338_525	12.1281	5.83054	P19338	Jklivemem
P31150_224	12.1218	NA	P31150	Jklivemem
P09429_144	12.1211	4.33948	P09429	Jklivemem
Q01813_394	12.1064	0.507201	Q01813	Jklivemem
P35579_721	12.1013	NA	P35579	Jklivemem
P21796_173	12.0921	4.80446	P21796	Jklivemem
P11142_431	12.0755	9.15039	P11142	Jklivemem
Q13547_67	12.0635	6.00309	Q13547	Jklivemem
P04350_106	12.0543	0	P04350	Jklivemem
Q16629_14	12.0392	4.60436	Q16629	Jklivemem
P13010_444	12.0293	7.27294	P13010	Jklivemem
P62899_25	12.0192	7.14633	P62899	Jklivemem
P14618_83	12.0149	1.8389	P14618	Jklivemem
P60953_154	11.9933	5.33229	P60953	Jklivemem
P27824_198	11.9908	3.52167	P27824	Jklivemem
Q9UDX5_21	11.985	3.11244	Q9UDX5	Jklivemem
Q9NR31_186	11.983	7.20856	Q9NR31	Jklivemem
P49736_486	11.9687	6.82218	P49736	Jklivemem
O75083_216	11.9649	8.34747	O75083	Jklivemem
P05141_251	11.9616	4.40811	P05141	Jklivemem
P11142_183	11.9397	6.91045	P11142	Jklivemem
P50570_265	11.939	11.3999	P50570	Jklivemem
P63241_127	11.9369	0.416629	P63241	Jklivemem
P40939_639	11.9145	NA	P40939	Jklivemem
P51149_183	11.9135	7.03269	P51149	Jklivemem
P51532_731	11.905	4.28021	P51532	Jklivemem
P55209_106	11.8993	5.28476	P55209	Jklivemem
P34896_118	11.8752	NA	P34896	Jklivemem
P62244_46	11.8671	11.5016	P62244	Jklivemem
O43390_578	11.8552	0.156403	O43390	Jklivemem
O75390_381	11.8501	NA	O75390	Jklivemem
P36578_52	11.8501	0.999896	P36578	Jklivemem
P17844_518	11.8477	11.5291	P17844	Jklivemem
O00148_38	11.829	1.58539	O00148	Jklivemem
Q13838_39	11.829	1.58539	Q13838	Jklivemem
Q14739_132	11.8252	2.39884	Q14739	Jklivemem
P60842_48	11.8242	2.60664	P60842	Jklivemem
P07437_159	11.8222	NA	P07437	Jklivemem
P43490_471	11.8075	NA	P43490	Jklivemem
Q14103_201	11.8041	NA	Q14103	Jklivemem
P52272_681	11.7862	5.11288	P52272	Jklivemem
Q14566_598	11.7851	5.35676	Q14566	Jklivemem
P07737_60	11.7793	3.68549	P07737	Jklivemem
P06576_196	11.7751	NA	P06576	Jklivemem
Q15233_265	11.7665	4.78714	Q15233	Jklivemem
O76003_80	11.7614	1.07238	O76003	Jklivemem
Q99986_302	11.747	2.49786	Q99986	Jklivemem
P62899_108	11.7349	6.23068	P62899	Jklivemem
O43488_239	11.7222	0.688265	O43488	Jklivemem
P09211_112	11.7177	6.60856	P09211	Jklivemem
P14866_576	11.7104	9.572	P14866	Jklivemem
P50990_468	11.7069	4.68706	P50990	Jklivemem
P48735_107	11.698	3.41881	P48735	Jklivemem
P07237_414	11.6932	11.7477	P07237	Jklivemem
P62805_52	11.6871	NA	P62805	Jklivemem
P18124_182	11.6751	NA	P18124	Jklivemem
P61011_163	11.6726	NA	P61011	Jklivemem
P06576_331	11.6698	NA	P06576	Jklivemem
Q13547_358	11.6555	2.68184	Q13547	Jklivemem
P13010_395	11.6504	4.25773	P13010	Jklivemem
Q12905_358	11.6492	11.8098	Q12905	Jklivemem
P20700_377	11.6472	6.31097	P20700	Jklivemem
P17252_504	11.6417	NA	P17252	Jklivemem
P14866_574	11.6402	1.03787	P14866	Jklivemem
P11142_41	11.6309	NA	P11142	Jklivemem
Q9GZS3_156	11.627	NA	Q9GZS3	Jklivemem
Q12931_470	11.614	5.62446	Q12931	Jklivemem
P07900_465	11.6119	2.45117	P07900	Jklivemem
P04899_303	11.6119	1.83564	P04899	Jklivemem
Q09028_154	11.6047	5.41949	Q09028	Jklivemem
Q9BTT0_92	11.603	7.75127	Q9BTT0	Jklivemem
O43143_142	11.6005	11.8787	O43143	Jklivemem
P12694_353	11.591	11.8922	P12694	Jklivemem
P40939_740	11.5738	NA	P40939	Jklivemem
Q6PL18_1123	11.5685	11.9239	Q6PL18	Jklivemem
P09874_309	11.5544	5.99241	P09874	Jklivemem
Q96I99_229	11.5239	NA	Q96I99	Jklivemem
P11413_112	11.5154	3.77057	P11413	Jklivemem
P08133_30	11.4872	3.58446	P08133	Jklivemem
P53396_247	11.4821	3.93795	P53396	Jklivemem
P14625_677	11.4776	5.4502	P14625	Jklivemem
P07814_374	11.473	NA	P07814	Jklivemem
P68363_312	11.4702	4.25369	P68363	Jklivemem
Q71U36_312	11.4702	4.25369	Q71U36	Jklivemem
Q9BQE3_312	11.4702	4.25369	Q9BQE3	Jklivemem
P31146_294	11.4638	0	P31146	Jklivemem
P04075_174	11.4605	NA	P04075	Jklivemem
Q00839_466	11.4554	NA	Q00839	Jklivemem
P07437_222	11.4552	5.16589	P07437	Jklivemem
Q9Y5U8_12	11.417	5.14378	Q9Y5U8	Jklivemem
P11413_139	11.4078	NA	P11413	Jklivemem
P41250_249	11.4051	NA	P41250	Jklivemem
P46782_188	11.4	1.54962	P46782	Jklivemem
P68032_93	11.3862	1.93181	P68032	Jklivemem
P68133_93	11.3862	1.93181	P68133	Jklivemem
Q7KZF4_178	11.386	5.47799	Q7KZF4	Jklivemem
P18124_61	11.383	1.97303	P18124	Jklivemem
P55265_1208	11.3826	4.70795	P55265	Jklivemem
Q07021_188	11.355	6.5956	Q07021	Jklivemem
Q9BUJ2_450	11.3525	1.286	Q9BUJ2	Jklivemem
P10412_71	11.3357	6.69705	P10412	Jklivemem
P36578_264	11.334	4.94832	P36578	Jklivemem
P53007_276	11.331	0.765581	P53007	Jklivemem
P52566_107	11.3208	0.451097	P52566	Jklivemem
P62826_147	11.3067	6.43678	P62826	Jklivemem
Q53GS9_215	11.3011	12.1617	Q53GS9	Jklivemem
Q04446_562	11.299	NA	Q04446	Jklivemem
P24539_116	11.2793	5.96765	P24539	Jklivemem
P24752_90	11.2783	4.7941	P24752	Jklivemem
P10768_202	11.2773	10.0062	P10768	Jklivemem
P49368_359	11.2765	NA	P49368	Jklivemem
P10768_123	11.2535	6.41675	P10768	Jklivemem
P16615_497	11.2505	9.67579	P16615	Jklivemem
O00422_132	11.2482	4.8506	O00422	Jklivemem
Q9Y2V2_99	11.2478	12.3775	Q9Y2V2	Jklivemem
P04406_140	11.238	9.42353	P04406	Jklivemem
Q8N183_137	11.2269	12.407	Q8N183	Jklivemem
O75533_623	11.2231	12.4125	O75533	Jklivemem
P46777_207	11.2209	4.54414	P46777	Jklivemem
P56385_32	11.2137	9.96402	P56385	Jklivemem
P08238_512	11.2119	NA	P08238	Jklivemem
P38159_281	11.2007	0.206884	P38159	Jklivemem
Q01813_645	11.1993	NA	Q01813	Jklivemem
P52306_118	11.1965	6.04354	P52306	Jklivemem
P03928_47	11.1955	NA	P03928	Jklivemem
Q00610_479	11.1896	12.4598	Q00610	Jklivemem
Q13547_201	11.1871	6.16096	Q13547	Jklivemem
P50991_282	11.1852	6.8816	P50991	Jklivemem
Q96DI7_158	11.1727	0	Q96DI7	Jklivemem
P08238_216	11.1657	5.95161	P08238	Jklivemem
Q06210_553	11.1639	NA	Q06210	Jklivemem
Q00839_260	11.142	3.68129	Q00839	Jklivemem
P52597_236	11.141	NA	P52597	Jklivemem
Q53GQ0_233	11.1352	12.5368	Q53GQ0	Jklivemem
P52272_64	11.129	NA	P52272	Jklivemem
Q96PK6_249	11.1191	12.5594	Q96PK6	Jklivemem
P68363_319	11.1141	NA	P68363	Jklivemem
P18124_195	11.111	6.02759	P18124	Jklivemem
Q14974_448	11.0953	12.5931	Q14974	Jklivemem
P26641_24	11.0945	5.6168	P26641	Jklivemem
Q96LW7_85	11.0764	12.6198	Q96LW7	Jklivemem
P78527_115	11.0698	0	P78527	Jklivemem
P39023_307	11.0589	NA	P39023	Jklivemem
P00734_603	11.0383	12.6737	P00734	Jklivemem
P23246_698	11.0308	0.778767	P23246	Jklivemem
P14866_474	11.0215	NA	P14866	Jklivemem
P58876_38	11.0209	5.65628	P58876	Jklivemem
P63220_53	10.9872	12.7461	P63220	Jklivemem
P42704_317	10.9826	0.357216	P42704	Jklivemem
P14866_267	10.9719	5.61164	P14866	Jklivemem
P53396_542	10.9667	0.131185	P53396	Jklivemem
O60506_223	10.9646	12.778	O60506	Jklivemem
P49736_747	10.9599	2.65131	P49736	Jklivemem
P14174_100	10.954	10.4454	P14174	Jklivemem
Q6L8Q7_172	10.9423	NA	Q6L8Q7	Jklivemem
P11413_118	10.9356	2.09494	P11413	Jklivemem
P10809_227	10.9269	NA	P10809	Jklivemem
Q9BTU6_465	10.9264	1.6501	Q9BTU6	Jklivemem
P11387_231	10.926	12.8326	P11387	Jklivemem
P63244_140	10.9013	2.61068	P63244	Jklivemem
Q14697_669	10.8943	12.8775	Q14697	Jklivemem
O14744_304	10.8825	NA	O14744	Jklivemem
P42704_1341	10.8761	NA	P42704	Jklivemem
P46777_95	10.8611	6.21284	P46777	Jklivemem
P40939_283	10.859	6.16944	P40939	Jklivemem
P33993_88	10.8531	5.78715	P33993	Jklivemem
Q16539_103	10.8514	NA	Q16539	Jklivemem
Q9Y277_67	10.8504	4.86136	Q9Y277	Jklivemem
P07814_290	10.8423	5.91264	P07814	Jklivemem
P61313_127	10.8383	NA	P61313	Jklivemem
P46782_38	10.8305	5.75331	P46782	Jklivemem
Q9BXP5_201	10.8286	12.9704	Q9BXP5	Jklivemem
Q6NUK1_272	10.8268	1.13078	Q6NUK1	Jklivemem
O00567_321	10.7955	6.1853	O00567	Jklivemem
P25205_19	10.791	10.8855	P25205	Jklivemem
P11310_73	10.7902	0.305486	P11310	Jklivemem
Q99986_113	10.7876	0.766783	Q99986	Jklivemem
P36578_161	10.7861	6.03363	P36578	Jklivemem
Q13509_36	10.7704	13.0526	Q13509	Jklivemem
P48643_274	10.7631	2.03105	P48643	Jklivemem
P00558_324	10.7439	0.602072	P00558	Jklivemem
P46778_156	10.742	3.35671	P46778	Jklivemem
P61221_350	10.7407	8.25789	P61221	Jklivemem
P50402_19	10.734	0.129886	P50402	Jklivemem
Q15392_378	10.7208	NA	Q15392	Jklivemem
P48643_280	10.709	6.74983	P48643	Jklivemem
P06748_271	10.7022	2.42454	P06748	Jklivemem
Q15046_95	10.6841	2.64708	Q15046	Jklivemem
Q9UDX5_157	10.68	13.1804	Q9UDX5	Jklivemem
Q13151_145	10.6643	11.0136	Q13151	Jklivemem
P12081_363	10.6631	13.2043	P12081	Jklivemem
P31943_266	10.6557	0.703658	P31943	Jklivemem
P62277_18	10.6529	5.58613	P62277	Jklivemem
P27694_193	10.6496	3.55542	P27694	Jklivemem
P33992_191	10.6478	6.92447	P33992	Jklivemem
P62258_214	10.6441	NA	P62258	Jklivemem
P49411_92	10.6266	3.71784	P49411	Jklivemem
P53597_78	10.6227	10.5436	P53597	Jklivemem
P25705_476	10.6199	0	P25705	Jklivemem
P22626_174	10.6101	1.7561	P22626	Jklivemem
O95466_90	10.6064	13.2845	O95466	Jklivemem
P40429_71	10.5991	2.03478	P40429	Jklivemem
O43615_265	10.588	4.85557	O43615	Jklivemem
Q6UW68_140	10.581	6.93303	Q6UW68	Jklivemem
P49736_637	10.5725	NA	P49736	Jklivemem
Q14166_244	10.5558	NA	Q14166	Jklivemem
Q15056_45	10.5389	NA	Q15056	Jklivemem
O43776_502	10.5347	13.386	O43776	Jklivemem
Q14318_232	10.5272	13.3965	Q14318	Jklivemem
Q9H2U2_230	10.5258	13.3985	Q9H2U2	Jklivemem
P33993_102	10.5231	13.4024	P33993	Jklivemem
P08574_174	10.5221	7.45594	P08574	Jklivemem
Q00839_350	10.5073	5.30407	Q00839	Jklivemem
P36776_394	10.4945	0.0671774	P36776	Jklivemem
Q92499_96	10.4942	8.44978	Q92499	Jklivemem
P00387_248	10.4904	5.75034	P00387	Jklivemem
Q9NVH1_146	10.4867	13.4538	Q9NVH1	Jklivemem
Q14739_595	10.4724	7.5241	Q14739	Jklivemem
P63092_311	10.4682	2.98276	P63092	Jklivemem
Q5JWF2_954	10.4682	2.98276	Q5JWF2	Jklivemem
Q09161_461	10.465	5.98064	Q09161	Jklivemem
P46777_253	10.4576	NA	P46777	Jklivemem
P16615_990	10.4518	NA	P16615	Jklivemem
Q16401_478	10.4497	7.43072	Q16401	Jklivemem
Q99460_535	10.4388	7.9269	Q99460	Jklivemem
P60709_198	10.4341	1.11001	P60709	Jklivemem
Q04446_73	10.4227	7.9588	Q04446	Jklivemem
P31939_464	10.4226	5.73203	P31939	Jklivemem
Q99714_101	10.409	13.5637	Q99714	Jklivemem
P31146_396	10.4048	NA	P31146	Jklivemem
Q14684_34	10.402	1.88966	Q14684	Jklivemem
P18031_46	10.3985	10.0653	P18031	Jklivemem
P14174_76	10.3955	13.5828	P14174	Jklivemem
P11142_115	10.3942	0.248681	P11142	Jklivemem
P67775_248	10.3902	0.798336	P67775	Jklivemem
P25705_337	10.3863	NA	P25705	Jklivemem
P43403_506	10.3769	6.84209	P43403	Jklivemem
Q9Y282_13	10.3729	11.194	Q9Y282	Jklivemem
P11413_202	10.3495	4.44169	P11413	Jklivemem
P13804_149	10.3467	2.27351	P13804	Jklivemem
Q08945_72	10.3394	13.6622	Q08945	Jklivemem
P15121_210	10.3344	13.6692	P15121	Jklivemem
O60884_69	10.3108	0.517115	O60884	Jklivemem
P54578_136	10.2988	NA	P54578	Jklivemem
P07814_1077	10.2982	NA	P07814	Jklivemem
Q08211_573	10.2786	13.7481	Q08211	Jklivemem
O75643_1154	10.2741	3.61171	O75643	Jklivemem
Q96F07_1078	10.2733	13.7556	Q96F07	Jklivemem
P23919_151	10.2733	13.7556	P23919	Jklivemem
O95379_55	10.2721	NA	O95379	Jklivemem
P36776_599	10.2706	13.7595	P36776	Jklivemem
Q07021_268	10.2655	NA	Q07021	Jklivemem
P37108_27	10.2588	4.58591	P37108	Jklivemem
P50991_269	10.2583	13.7769	P50991	Jklivemem
P23528_89	10.2486	3.28448	P23528	Jklivemem
Q15056_42	10.2303	NA	Q15056	Jklivemem
P04406_314	10.2302	3.74831	P04406	Jklivemem
Q9NSD9_173	10.2219	6.72825	Q9NSD9	Jklivemem
P48651_274	10.2155	6.0099	P48651	Jklivemem
Q14204_2792	10.2068	NA	Q14204	Jklivemem
P21796_153	10.1955	0	P21796	Jklivemem
Q7Z6Z7_1609	10.1923	0.737755	Q7Z6Z7	Jklivemem
P04350_50	10.1831	13.8831	P04350	Jklivemem
Q9BTD8_446	10.1817	13.8851	Q9BTD8	Jklivemem
Q9UI30_74	10.1698	5.79317	Q9UI30	Jklivemem
O14744_307	10.162	13.9131	O14744	Jklivemem
P63244_302	10.1603	0	P63244	Jklivemem
Q14697_854	10.1589	NA	Q14697	Jklivemem
Q9BPW8_262	10.147	0.0502053	Q9BPW8	Jklivemem
P27797_306	10.1353	NA	P27797	Jklivemem
P09429_16	10.1304	9.56016	P09429	Jklivemem
O60832_69	10.1241	13.9666	O60832	Jklivemem
P43308_175	10.1135	3.57838	P43308	Jklivemem
Q02978_202	10.1003	5.17343	Q02978	Jklivemem
Q99986_194	10.0983	NA	Q99986	Jklivemem
P40939_637	10.0864	4.29371	P40939	Jklivemem
P18669_133	10.0856	NA	P18669	Jklivemem
O43776_489	10.075	9.67442	O43776	Jklivemem
P08865_156	10.0647	5.54709	P08865	Jklivemem
P31150_226	10.0559	NA	P31150	Jklivemem
Q16836_254	10.0533	NA	Q16836	Jklivemem
P40939_499	10.0513	0.488466	P40939	Jklivemem
O43390_436	10.0507	1.62082	O43390	Jklivemem
Q14974_752	10.04	14.0855	Q14974	Jklivemem
P62195_148	10.035	14.0927	P62195	Jklivemem
Q12906_22	10.0349	14.0927	Q12906	Jklivemem
P63000_98	10.0336	3.28146	P63000	Jklivemem
P27797_338	10.025	11.5181	P27797	Jklivemem
P78527_265	10.0244	1.4367	P78527	Jklivemem
O43390_434	10.0197	4.34273	O43390	Jklivemem
Q08211_148	10.0139	4.64062	Q08211	Jklivemem
P62851_109	10.0124	NA	P62851	Jklivemem
P11216_197	10.0018	9.84713	P11216	Jklivemem
P62701_54	10	2.00254	P62701	Jklivemem
Q9NPF2_64	9.99892	NA	Q9NPF2	Jklivemem
Q99536_285	9.99269	6.69379	Q99536	Jklivemem
P08238_426	9.98249	9.15846	P08238	Jklivemem
P09211_109	9.98222	NA	P09211	Jklivemem
P00558_196	9.97171	4.57288	P00558	Jklivemem
Q9NSD9_72	9.97	0	Q9NSD9	Jklivemem
P28340_396	9.95496	12.9079	P28340	Jklivemem
P62854_73	9.93255	NA	P62854	Jklivemem
P68104_167	9.91985	NA	P68104	Jklivemem
Q5VTE0_167	9.91985	NA	Q5VTE0	Jklivemem
P39023_228	9.90656	3.65844	P39023	Jklivemem
Q86YE8_498	9.90405	6.95987	Q86YE8	Jklivemem
P50991_24	9.89663	2.96251	P50991	Jklivemem
B0I1T2_624	9.85536	8.63539	B0I1T2	Jklivemem
O43143_323	9.84781	10.2485	O43143	Jklivemem
P36578_211	9.84495	NA	P36578	Jklivemem
P17844_76	9.84311	9.7204	P17844	Jklivemem
Q92841_135	9.84139	8.02198	Q92841	Jklivemem
Q96I99_123	9.83897	0.715473	Q96I99	Jklivemem
Q08J23_121	9.83861	7.12714	Q08J23	Jklivemem
Q9H330_533	9.83282	8.76078	Q9H330	Jklivemem
P46779_102	9.82777	6.6769	P46779	Jklivemem
Q9H7Z7_222	9.8267	2.4122	Q9H7Z7	Jklivemem
P14868_402	9.82619	9.86499	P14868	Jklivemem
P38646_331	9.82578	1.53815	P38646	Jklivemem
O75643_87	9.80357	0	O75643	Jklivemem
Q96EY1_120	9.79827	2.46294	Q96EY1	Jklivemem
P48047_41	9.79565	4.80358	P48047	Jklivemem
P33991_471	9.79417	5.01561	P33991	Jklivemem
Q9UHD8_473	9.79252	8.36754	Q9UHD8	Jklivemem
P40939_736	9.78175	7.14216	P40939	Jklivemem
P23526_193	9.76832	6.79872	P23526	Jklivemem
Q9BTM1_40	9.74638	5.98386	Q9BTM1	Jklivemem
P62280_55	9.71988	1.10294	P62280	Jklivemem
P06733_280	9.71014	NA	P06733	Jklivemem
P68032_71	9.70664	5.47077	P68032	Jklivemem
P68133_71	9.70664	5.47077	P68133	Jklivemem
P31943_240	9.70581	4.16104	P31943	Jklivemem
P47897_243	9.70214	5.76014	P47897	Jklivemem
O43390_229	9.69822	NA	O43390	Jklivemem
Q96PK6_665	9.69605	1.75863	Q96PK6	Jklivemem
Q13153_429	9.69019	6.27592	Q13153	Jklivemem
Q13177_408	9.69019	6.27592	Q13177	Jklivemem
P21964_118	9.68111	9.70987	P21964	Jklivemem
O00410_531	9.67007	13.2852	O00410	Jklivemem
P30626_67	9.65828	4.13232	P30626	Jklivemem
P50454_135	9.65127	8.98473	P50454	Jklivemem
Q9Y2U8_441	9.64961	4.80827	Q9Y2U8	Jklivemem
Q13838_266	9.63642	NA	Q13838	Jklivemem
P06576_499	9.63621	NA	P06576	Jklivemem
P51991_188	9.61462	NA	P51991	Jklivemem
Q9P258_359	9.59918	2.80755	Q9P258	Jklivemem
P22314_560	9.59287	NA	P22314	Jklivemem
O43143_765	9.57946	7.98655	O43143	Jklivemem
P62854_62	9.57897	7.51423	P62854	Jklivemem
P35249_77	9.57671	2.5042	P35249	Jklivemem
P07900_216	9.57591	2.51685	P07900	Jklivemem
Q9NVI7_399	9.56375	7.63296	Q9NVI7	Jklivemem
Q7KZF4_766	9.55818	3.55567	Q7KZF4	Jklivemem
P21964_197	9.55554	1.71892	P21964	Jklivemem
P08238_211	9.54959	NA	P08238	Jklivemem
Q00839_473	9.54162	3.52268	Q00839	Jklivemem
Q13131_190	9.51452	NA	Q13131	Jklivemem
Q9BRA2_99	9.51348	8.3865	Q9BRA2	Jklivemem
P43243_413	9.51228	0	P43243	Jklivemem
P23528_68	9.51093	NA	P23528	Jklivemem
Q9Y3B4_117	9.50726	8.00894	Q9Y3B4	Jklivemem
P62888_63	9.50583	NA	P62888	Jklivemem
O75083_472	9.50182	NA	O75083	Jklivemem
Q86VR2_49	9.49617	3.37921	Q86VR2	Jklivemem
Q9NZI8_321	9.48248	5.71556	Q9NZI8	Jklivemem
Q86UX7_436	9.47356	7.7684	Q86UX7	Jklivemem
P61160_72	9.44898	6.62359	P61160	Jklivemem
P52566_146	9.4445	4.56282	P52566	Jklivemem
P25685_67	9.4416	6.67532	P25685	Jklivemem
P31939_192	9.41466	NA	P31939	Jklivemem
P31939_208	9.41354	3.56681	P31939	Jklivemem
Q96G23_88	9.40935	5.05096	Q96G23	Jklivemem
O15258_29	9.4052	NA	O15258	Jklivemem
P11216_263	9.40115	12.6874	P11216	Jklivemem
P06733_270	9.40103	NA	P06733	Jklivemem
P06730_197	9.3897	7.14548	P06730	Jklivemem
P26368_469	9.38333	6.53462	P26368	Jklivemem
Q13724_738	9.37834	4.4746	Q13724	Jklivemem
Q07666_103	9.36608	NA	Q07666	Jklivemem
P48735_179	9.3584	5.11083	P48735	Jklivemem
P07437_183	9.34473	8.9516	P07437	Jklivemem
O14818_118	9.32813	3.39745	O14818	Jklivemem
Q8TAA3_126	9.32813	3.39745	Q8TAA3	Jklivemem
Q86VN1_235	9.31713	NA	Q86VN1	Jklivemem
P49588_690	9.3142	7.81871	P49588	Jklivemem
P60842_126	9.31076	2.14441	P60842	Jklivemem
Q96A33_372	9.3082	5.85725	Q96A33	Jklivemem
Q92499_380	9.29941	0	Q92499	Jklivemem
Q00169_62	9.28721	0.52409	Q00169	Jklivemem
Q5T4S7_4622	9.27608	NA	Q5T4S7	Jklivemem
P48735_258	9.26747	NA	P48735	Jklivemem
P34932_400	9.26664	7.20992	P34932	Jklivemem
Q8TBP6_176	9.26574	NA	Q8TBP6	Jklivemem
Q9ULX3_334	9.26294	NA	Q9ULX3	Jklivemem
Q14157_858	9.26088	NA	Q14157	Jklivemem
P49736_234	9.25587	5.87496	P49736	Jklivemem
P24941_236	9.24986	5.69743	P24941	Jklivemem
P46776_48	9.24824	1.69678	P46776	Jklivemem
Q9BTU6_362	9.24801	NA	Q9BTU6	Jklivemem
P08708_53	9.23856	NA	P08708	Jklivemem
O00299_143	9.22946	6.3882	O00299	Jklivemem
P38646_181	9.22903	4.91366	P38646	Jklivemem
O43143_177	9.22467	2.33559	O43143	Jklivemem
P83881_48	9.2213	1.30601	P83881	Jklivemem
Q969Q0_48	9.2213	1.30601	Q969Q0	Jklivemem
Q13283_20	9.21278	3.09224	Q13283	Jklivemem
P31942_85	9.20933	6.0582	P31942	Jklivemem
O14929_25	9.20104	NA	O14929	Jklivemem
P48735_81	9.19973	5.33178	P48735	Jklivemem
P08238_430	9.19903	5.34492	P08238	Jklivemem
Q92598_322	9.19822	NA	Q92598	Jklivemem
Q9NRR5_279	9.19473	9.09126	Q9NRR5	Jklivemem
Q7Z6Z7_697	9.15436	NA	Q7Z6Z7	Jklivemem
P07203_98	9.15429	4.94014	P07203	Jklivemem
P14618_370	9.14887	NA	P14618	Jklivemem
P62820_112	9.14867	NA	P62820	Jklivemem
Q16630_441	9.14748	0	Q16630	Jklivemem
O00571_301	9.13944	2.1478	O00571	Jklivemem
P37802_103	9.13531	0	P37802	Jklivemem
P33993_21	9.11744	3.41854	P33993	Jklivemem
P62258_131	9.11501	7.09159	P62258	Jklivemem
P37268_46	9.11435	4.30903	P37268	Jklivemem
P47897_748	9.11214	6.1321	P47897	Jklivemem
P07900_313	9.10251	9.91332	P07900	Jklivemem
P60709_240	9.09693	NA	P60709	Jklivemem
P43490_108	9.06827	1.9809	P43490	Jklivemem
P61978_449	9.0423	6.32586	P61978	Jklivemem
P11388_136	9.01234	1.71829	P11388	Jklivemem
P31942_100	9.01144	NA	P31942	Jklivemem
Q8WUM4_223	9.00922	1.90834	Q8WUM4	Jklivemem
P17844_59	8.99569	6.56394	P17844	Jklivemem
O95168_77	8.98221	4.39387	O95168	Jklivemem
Q9UKM9_62	8.97665	NA	Q9UKM9	Jklivemem
P22314_618	8.9759	10.3114	P22314	Jklivemem
P04075_204	8.96771	NA	P04075	Jklivemem
P24752_188	8.93897	5.88827	P24752	Jklivemem
P61254_135	8.93498	2.11416	P61254	Jklivemem
P43243_171	8.92833	1.53431	P43243	Jklivemem
P31040_55	8.92451	0	P31040	Jklivemem
Q14671_784	8.91535	7.04379	Q14671	Jklivemem
P12956_88	8.91385	NA	P12956	Jklivemem
P23743_240	8.91382	NA	P23743	Jklivemem
Q14690_1103	8.89601	7.50646	Q14690	Jklivemem
Q14165_199	8.8847	0.424292	Q14165	Jklivemem
Q9BZJ0_223	8.8845	5.58493	Q9BZJ0	Jklivemem
P33992_212	8.88334	4.45191	P33992	Jklivemem
P62330_31	8.8829	4.78606	P62330	Jklivemem
P84077_35	8.8829	4.78606	P84077	Jklivemem
Q5SSJ5_416	8.87531	0	Q5SSJ5	Jklivemem
O14776_1074	8.86774	7.58523	O14776	Jklivemem
P06737_281	8.86751	8.17558	P06737	Jklivemem
P11216_281	8.86751	8.17558	P11216	Jklivemem
P31040_641	8.8663	5.39833	P31040	Jklivemem
P50148_151	8.85943	5.73279	P50148	Jklivemem
P68363_408	8.85728	3.91001	P68363	Jklivemem
Q71U36_408	8.85728	3.91001	Q71U36	Jklivemem
P53396_682	8.85622	1.70001	P53396	Jklivemem
P28838_377	8.84991	6.50702	P28838	Jklivemem
Q9NYL4_119	8.84973	12.2879	Q9NYL4	Jklivemem
P13639_175	8.84948	NA	P13639	Jklivemem
P22830_159	8.8371	NA	P22830	Jklivemem
B0I1T2_79	8.83617	NA	B0I1T2	Jklivemem
P30101_454	8.83103	3.11033	P30101	Jklivemem
O00264_113	8.8199	8.93914	O00264	Jklivemem
P13796_585	8.81755	5.90078	P13796	Jklivemem
Q13838_265	8.80153	7.8513	Q13838	Jklivemem
Q9GZR7_809	8.79357	5.99938	Q9GZR7	Jklivemem
P40763_640	8.78912	3.34248	P40763	Jklivemem
P55084_402	8.77498	NA	P55084	Jklivemem
P34897_350	8.76811	3.2767	P34897	Jklivemem
O75643_1295	8.76227	9.04638	O75643	Jklivemem
Q08211_200	8.7585	NA	Q08211	Jklivemem
P30519_268	8.74309	2.75872	P30519	Jklivemem
O75964_22	8.73621	NA	O75964	Jklivemem
P40939_271	8.72578	NA	P40939	Jklivemem
P07900_438	8.71378	NA	P07900	Jklivemem
P06576_395	8.70653	3.88019	P06576	Jklivemem
O00571_343	8.69241	NA	O00571	Jklivemem
P46782_45	8.65785	2.42318	P46782	Jklivemem
Q8IY81_727	8.65739	10.0671	Q8IY81	Jklivemem
P08574_218	8.65393	0.657559	P08574	Jklivemem
Q9UBM7_455	8.64679	4.31074	Q9UBM7	Jklivemem
Q9UJA5_146	8.62825	NA	Q9UJA5	Jklivemem
Q14165_239	8.62622	NA	Q14165	Jklivemem
O95372_205	8.62519	4.46579	O95372	Jklivemem
Q9UG63_503	8.62325	1.37029	Q9UG63	Jklivemem
P06744_144	8.62105	9.63098	P06744	Jklivemem
P14866_430	8.61329	4.60604	P14866	Jklivemem
P13804_105	8.59402	6.92507	P13804	Jklivemem
P40939_320	8.56531	7.55786	P40939	Jklivemem
P27824_185	8.5609	0.629223	P27824	Jklivemem
P14406_44	8.56007	7.73235	P14406	Jklivemem
Q6P2Q9_219	8.55628	NA	Q6P2Q9	Jklivemem
P40937_59	8.54866	1.49586	P40937	Jklivemem
Q99829_512	8.53361	0	Q99829	Jklivemem
Q9UJZ1_316	8.53075	0	Q9UJZ1	Jklivemem
P10768_211	8.52865	NA	P10768	Jklivemem
P56192_718	8.52416	3.81364	P56192	Jklivemem
P22234_22	8.52309	8.51181	P22234	Jklivemem
P18124_139	8.51891	7.86778	P18124	Jklivemem
P21912_241	8.51266	3.12168	P21912	Jklivemem
Q9BSJ8_803	8.50483	NA	Q9BSJ8	Jklivemem
Q8N2U0_36	8.49318	7.61204	Q8N2U0	Jklivemem
P07737_129	8.43563	2.21376	P07737	Jklivemem
P49207_13	8.42971	3.20514	P49207	Jklivemem
O15145_132	8.42599	4.43656	O15145	Jklivemem
Q13303_270	8.4168	1.0991	Q13303	Jklivemem
O15382_228	8.41275	6.13168	O15382	Jklivemem
Q9Y676_203	8.40427	NA	Q9Y676	Jklivemem
Q9Y6M9_73	8.39655	5.50594	Q9Y6M9	Jklivemem
P11310_183	8.38915	8.52132	P11310	Jklivemem
P36776_461	8.37962	NA	P36776	Jklivemem
Q6IC98_177	8.37934	3.86838	Q6IC98	Jklivemem
O43684_42	8.37172	8.75157	O43684	Jklivemem
Q99986_311	8.32862	3.83731	Q99986	Jklivemem
P31146_364	8.31091	NA	P31146	Jklivemem
Q9Y490_81	8.30836	7.19955	Q9Y490	Jklivemem
P07766_113	8.29754	3.81612	P07766	Jklivemem
P30084_153	8.29294	NA	P30084	Jklivemem
Q8TCJ2_695	8.29108	3.47635	Q8TCJ2	Jklivemem
Q9HD45_272	8.2848	5.3996	Q9HD45	Jklivemem
P22830_209	8.2836	NA	P22830	Jklivemem
Q96PK6_645	8.27357	2.13554	Q96PK6	Jklivemem
P38646_230	8.26835	3.811	P38646	Jklivemem
P41252_409	8.23725	0.770576	P41252	Jklivemem
O95433_333	8.23051	2.66725	O95433	Jklivemem
P22392_67	8.22718	NA	P22392	Jklivemem
P62241_27	8.22678	4.21264	P62241	Jklivemem
P61221_316	8.19591	2.25541	P61221	Jklivemem
O75844_253	8.19315	0.279738	O75844	Jklivemem
P22087_118	8.18373	2.92143	P22087	Jklivemem
Q9UQ80_247	8.18304	5.52214	Q9UQ80	Jklivemem
O94826_450	8.17942	6.67371	O94826	Jklivemem
Q99598_187	8.17159	NA	Q99598	Jklivemem
Q8WYA6_448	8.16815	4.36663	Q8WYA6	Jklivemem
Q9NX63_49	8.16533	5.61811	Q9NX63	Jklivemem
Q16778_41	8.161	6.83818	Q16778	Jklivemem
Q99536_273	8.15977	2.03091	Q99536	Jklivemem
P62879_239	8.12158	NA	P62879	Jklivemem
P63241_98	8.12145	NA	P63241	Jklivemem
Q16539_182	8.12106	1.02429	Q16539	Jklivemem
P41252_540	8.11094	NA	P41252	Jklivemem
P26640_323	8.10309	6.40881	P26640	Jklivemem
P40227_109	8.09639	8.88885	P40227	Jklivemem
Q9H845_589	8.09342	7.26022	Q9H845	Jklivemem
P49756_256	8.08852	3.718	P49756	Jklivemem
P48147_510	8.08379	2.625	P48147	Jklivemem
P07437_59	8.07839	7.93755	P07437	Jklivemem
P06576_269	8.07642	8.23356	P06576	Jklivemem
Q9H9B4_54	8.07504	4.76511	Q9H9B4	Jklivemem
Q13547_226	8.03218	7.43717	Q13547	Jklivemem
O43143_490	8.0287	5.65964	O43143	Jklivemem
Q06830_116	8.02744	0.638908	Q06830	Jklivemem
P49755_167	8.0222	4.88698	P49755	Jklivemem
O75494_46	8.02146	1.0863	O75494	Jklivemem
P17980_185	8.01732	NA	P17980	Jklivemem
Q16740_229	8.01234	9.56512	Q16740	Jklivemem
O60880_100	8.00864	7.35407	O60880	Jklivemem
Q96HE7_191	7.99963	11.1686	Q96HE7	Jklivemem
P62805_73	7.99408	NA	P62805	Jklivemem
Q8NI27_1067	7.98063	3.6857	Q8NI27	Jklivemem
P36776_473	7.97851	6.61314	P36776	Jklivemem
P47813_84	7.97	NA	P47813	Jklivemem
Q14839_1040	7.96858	0.809135	Q14839	Jklivemem
P61978_135	7.95115	NA	P61978	Jklivemem
Q13838_139	7.94303	4.39046	Q13838	Jklivemem
O00425_321	7.93322	2.56443	O00425	Jklivemem
P62269_77	7.92771	3.52917	P62269	Jklivemem
Q16891_636	7.92488	3.9059	Q16891	Jklivemem
Q8NE71_710	7.9094	5.74058	Q8NE71	Jklivemem
P60842_50	7.90765	9.71537	P60842	Jklivemem
P62241_188	7.90408	NA	P62241	Jklivemem
Q15366_349	7.90106	8.40561	Q15366	Jklivemem
P17987_131	7.89181	7.36864	P17987	Jklivemem
O00567_348	7.88719	8.24641	O00567	Jklivemem
P11310_385	7.88386	2.93043	P11310	Jklivemem
Q16644_263	7.86419	4.76623	Q16644	Jklivemem
Q04446_560	7.8628	NA	Q04446	Jklivemem
P06733_407	7.85669	5.63183	P06733	Jklivemem
P38646_118	7.85223	NA	P38646	Jklivemem
Q92841_279	7.83427	9.20022	Q92841	Jklivemem
P25705_299	7.8314	6.22487	P25705	Jklivemem
P07900_480	7.82652	3.04361	P07900	Jklivemem
P30101_356	7.82181	5.32915	P30101	Jklivemem
P04632_87	7.80684	NA	P04632	Jklivemem
P26368_269	7.80273	0	P26368	Jklivemem
Q14108_284	7.79933	NA	Q14108	Jklivemem
Q5SSJ5_367	7.79353	3.81452	Q5SSJ5	Jklivemem
Q02878_216	7.78745	3.86185	Q02878	Jklivemem
Q6P2Q9_909	7.78378	NA	Q6P2Q9	Jklivemem
P40939_343	7.78184	NA	P40939	Jklivemem
P32969_96	7.77653	0	P32969	Jklivemem
P14625_271	7.77358	NA	P14625	Jklivemem
P04234_160	7.75128	3.02264	P04234	Jklivemem
P23246_490	7.74349	NA	P23246	Jklivemem
P12236_112	7.73921	NA	P12236	Jklivemem
Q9GZP9_218	7.73776	5.35151	Q9GZP9	Jklivemem
P30101_402	7.73624	NA	P30101	Jklivemem
P34897_195	7.68559	1.90689	P34897	Jklivemem
P62841_30	7.66429	0	P62841	Jklivemem
P68104_85	7.66364	7.71047	P68104	Jklivemem
Q5VTE0_85	7.66364	7.71047	Q5VTE0	Jklivemem
P78371_213	7.64365	8.3895	P78371	Jklivemem
Q99798_42	7.63407	1.59031	Q99798	Jklivemem
Q9NUM4_84	7.62724	1.76893	Q9NUM4	Jklivemem
P67775_284	7.61123	NA	P67775	Jklivemem
Q16181_80	7.60885	7.34036	Q16181	Jklivemem
Q9BPW8_261	7.60323	1.01043	Q9BPW8	Jklivemem
O14980_36	7.59539	3.32158	O14980	Jklivemem
P51991_149	7.59433	4.02581	P51991	Jklivemem
P31939_362	7.57933	5.5557	P31939	Jklivemem
P11388_841	7.57918	NA	P11388	Jklivemem
P05455_188	7.56505	NA	P05455	Jklivemem
P07814_377	7.55015	3.25752	P07814	Jklivemem
P50416_666	7.53527	5.1973	P50416	Jklivemem
Q9UL25_88	7.53287	7.40978	Q9UL25	Jklivemem
P37268_14	7.53224	3.49028	P37268	Jklivemem
P62140_86	7.52804	NA	P62140	Jklivemem
O75083_336	7.52017	8.15769	O75083	Jklivemem
P60660_29	7.51393	8.8903	P60660	Jklivemem
P25325_37	7.49174	NA	P25325	Jklivemem
P52597_194	7.49032	6.48217	P52597	Jklivemem
Q96IX5_18	7.48982	NA	Q96IX5	Jklivemem
P61978_236	7.47626	7.57807	P61978	Jklivemem
P62249_99	7.476	8.57868	P62249	Jklivemem
P62805_89	7.46199	1.72361	P62805	Jklivemem
Q9Y6N5_434	7.46132	2.23998	Q9Y6N5	Jklivemem
Q13547_204	7.46029	4.24376	Q13547	Jklivemem
Q93009_706	7.4555	NA	Q93009	Jklivemem
Q15907_91	7.45085	NA	Q15907	Jklivemem
P31939_558	7.44693	NA	P31939	Jklivemem
P36542_77	7.42656	7.40225	P36542	Jklivemem
P18669_26	7.41802	4.51856	P18669	Jklivemem
O75792_172	7.40165	8.82238	O75792	Jklivemem
P43243_454	7.39628	4.60374	P43243	Jklivemem
P09211_80	7.39152	7.7914	P09211	Jklivemem
O60506_205	7.38562	9.08357	O60506	Jklivemem
Q99733_180	7.3744	0	Q99733	Jklivemem
Q9HB71_78	7.37004	9.91748	Q9HB71	Jklivemem
Q96PK6_648	7.36689	5.41628	Q96PK6	Jklivemem
Q16666_635	7.36576	3.07558	Q16666	Jklivemem
Q9UMS4_33	7.36384	7.17744	Q9UMS4	Jklivemem
P38919_202	7.36279	NA	P38919	Jklivemem
P31939_185	7.36151	4.66629	P31939	Jklivemem
P40939_298	7.3503	3.16354	P40939	Jklivemem
Q7L7L0_40	7.34694	0.33598	Q7L7L0	Jklivemem
O15173_143	7.34453	2.1489	O15173	Jklivemem
P11413_322	7.34003	4.27827	P11413	Jklivemem
P55265_483	7.3374	4.05771	P55265	Jklivemem
P41250_261	7.33617	5.62734	P41250	Jklivemem
P09874_907	7.33515	0	P09874	Jklivemem
P04350_59	7.33194	1.54616	P04350	Jklivemem
Q9Y617_101	7.3091	8.18106	Q9Y617	Jklivemem
O95563_32	7.308	5.54833	O95563	Jklivemem
Q14697_113	7.3028	1.32932	Q14697	Jklivemem
P17844_244	7.301	7.52901	P17844	Jklivemem
P00747_416	7.28739	NA	P00747	Jklivemem
P46977_331	7.28097	NA	P46977	Jklivemem
O00231_415	7.27665	2.2911	O00231	Jklivemem
Q08945_353	7.24694	3.23469	Q08945	Jklivemem
P11940_140	7.24391	2.36547	P11940	Jklivemem
P14618_105	7.23551	8.74418	P14618	Jklivemem
Q92945_625	7.21914	2.51694	Q92945	Jklivemem
Q9P2J5_183	7.21009	2.84632	Q9P2J5	Jklivemem
P50213_153	7.20908	NA	P50213	Jklivemem
Q9Y2Z0_95	7.20034	0.795771	Q9Y2Z0	Jklivemem
Q5SSJ5_379	7.1898	1.53686	Q5SSJ5	Jklivemem
P14625_527	7.18914	2.29846	P14625	Jklivemem
Q12931_106	7.18786	0.0396608	Q12931	Jklivemem
P08238_484	7.17541	1.56867	P08238	Jklivemem
O14950_122	7.15556	5.27964	O14950	Jklivemem
Q9Y6N5_242	7.15363	9.91334	Q9Y6N5	Jklivemem
P55263_77	7.14182	7.48569	P55263	Jklivemem
Q92841_267	7.13482	2.44416	Q92841	Jklivemem
Q16666_645	7.12843	NA	Q16666	Jklivemem
Q07666_145	7.12661	3.66664	Q07666	Jklivemem
B0I1T2_72	7.11411	9.46707	B0I1T2	Jklivemem
Q92973_51	7.1111	NA	Q92973	Jklivemem
Q7L014_718	7.10373	4.14213	Q7L014	Jklivemem
Q15029_722	7.1035	NA	Q15029	Jklivemem
P31146_306	7.10202	0.274789	P31146	Jklivemem
P62879_145	7.0936	8.798	P62879	Jklivemem
O75083_96	7.08843	NA	O75083	Jklivemem
Q5JRX3_383	7.08324	9.85895	Q5JRX3	Jklivemem
P12956_103	7.07508	2.27262	P12956	Jklivemem
P67775_218	7.07329	0	P67775	Jklivemem
Q9Y240_234	7.06565	2.11501	Q9Y240	Jklivemem
P54578_436	7.05202	3.48009	P54578	Jklivemem
P61978_234	7.02874	3.83011	P61978	Jklivemem
P53999_88	7.02817	NA	P53999	Jklivemem
P23743_544	7.02627	NA	P23743	Jklivemem
Q16836_311	7.01606	2.79587	Q16836	Jklivemem
Q9H0A0_640	7.01389	8.77544	Q9H0A0	Jklivemem
Q8N183_38	7.013	4.1833	Q8N183	Jklivemem
Q14980_1774	7.00722	8.36123	Q14980	Jklivemem
P23258_86	6.99261	NA	P23258	Jklivemem
Q99986_213	6.98598	NA	Q99986	Jklivemem
P36776_623	6.98208	5.07026	P36776	Jklivemem
P55265_1112	6.97359	3.96281	P55265	Jklivemem
P35579_400	6.96905	1.68739	P35579	Jklivemem
P35580_407	6.96905	1.68739	P35580	Jklivemem
P55060_861	6.95537	8.85699	P55060	Jklivemem
P47813_95	6.94753	5.96202	P47813	Jklivemem
P21796_225	6.93877	7.76384	P21796	Jklivemem
P08133_313	6.91488	7.95912	P08133	Jklivemem
P43243_784	6.90828	NA	P43243	Jklivemem
P41252_289	6.90275	NA	P41252	Jklivemem
Q9H0A0_732	6.89922	2.55994	Q9H0A0	Jklivemem
P48047_82	6.89514	7.52271	P48047	Jklivemem
P10809_223	6.88921	8.96953	P10809	Jklivemem
Q16836_226	6.86638	1.73275	Q16836	Jklivemem
Q13151_180	6.85929	4.77758	Q13151	Jklivemem
Q13547_237	6.85481	0.790985	Q13547	Jklivemem
P09874_689	6.85428	1.64253	P09874	Jklivemem
Q9BSJ8_822	6.85157	3.26477	Q9BSJ8	Jklivemem
Q13283_40	6.84834	6.72248	Q13283	Jklivemem
P30101_196	6.84788	5.52426	P30101	Jklivemem
P50990_304	6.84642	9.3956	P50990	Jklivemem
P41252_94	6.8416	1.63161	P41252	Jklivemem
P17706_32	6.83361	1.25852	P17706	Jklivemem
P22314_922	6.83031	3.71059	P22314	Jklivemem
P43897_288	6.82949	NA	P43897	Jklivemem
P62241_113	6.82367	3.53247	P62241	Jklivemem
Q9ULC4_169	6.82288	7.80853	Q9ULC4	Jklivemem
Q9NRV9_65	6.82062	NA	Q9NRV9	Jklivemem
P62826_155	6.81701	7.23631	P62826	Jklivemem
Q10471_434	6.81233	3.30784	Q10471	Jklivemem
P13693_18	6.80693	4.17747	P13693	Jklivemem
P11766_180	6.80506	7.76574	P11766	Jklivemem
P18583_935	6.80229	3.31063	P18583	Jklivemem
Q14697_396	6.79737	0	Q14697	Jklivemem
P22314_873	6.78114	6.71785	P22314	Jklivemem
P00558_161	6.78065	6.66729	P00558	Jklivemem
P31948_376	6.77347	8.42108	P31948	Jklivemem
Q14166_308	6.76795	9.57086	Q14166	Jklivemem
Q6DD88_364	6.76327	5.46876	Q6DD88	Jklivemem
P51610_268	6.75802	NA	P51610	Jklivemem
Q8TAA3_153	6.7427	1.50188	Q8TAA3	Jklivemem
P40926_253	6.74082	NA	P40926	Jklivemem
Q14697_792	6.73522	4.31509	Q14697	Jklivemem
P51149_151	6.72722	6.88082	P51149	Jklivemem
Q9NTJ5_449	6.71529	5.20673	Q9NTJ5	Jklivemem
Q99536_59	6.71171	0.406451	Q99536	Jklivemem
P13639_639	6.70726	11.6709	P13639	Jklivemem
P08621_126	6.70584	2.57387	P08621	Jklivemem
Q96K37_337	6.69293	1.0977	Q96K37	Jklivemem
Q9HB71_199	6.68962	3.02334	Q9HB71	Jklivemem
P33993_492	6.67537	1.27777	P33993	Jklivemem
Q86U86_126	6.65456	NA	Q86U86	Jklivemem
Q00610_1096	6.64627	NA	Q00610	Jklivemem
P27797_285	6.6406	1.35252	P27797	Jklivemem
Q9NSE4_240	6.63325	7.80558	Q9NSE4	Jklivemem
P07741_60	6.62557	6.05401	P07741	Jklivemem
P54136_323	6.62359	2.25652	P54136	Jklivemem
Q00839_525	6.62057	1.14133	Q00839	Jklivemem
O95433_322	6.61011	4.72108	O95433	Jklivemem
Q02543_10	6.60713	2.29136	Q02543	Jklivemem
P27348_118	6.60655	8.45905	P27348	Jklivemem
P61981_123	6.60655	8.45905	P61981	Jklivemem
Q14103_116	6.6065	NA	Q14103	Jklivemem
P42704_583	6.60578	0	P42704	Jklivemem
Q02543_28	6.58208	4.08768	Q02543	Jklivemem
P50570_563	6.57162	NA	P50570	Jklivemem
P00846_36	6.57024	5.87492	P00846	Jklivemem
P13010_397	6.55934	NA	P13010	Jklivemem
P10768_121	6.55069	3.64296	P10768	Jklivemem
P08133_76	6.5462	2.89714	P08133	Jklivemem
P55809_161	6.54429	3.32063	P55809	Jklivemem
P30101_67	6.54385	NA	P30101	Jklivemem
P33991_193	6.54029	5.28369	P33991	Jklivemem
P67775_267	6.51867	2.40429	P67775	Jklivemem
P60842_175	6.51394	2.55005	P60842	Jklivemem
Q9NX61_40	6.51123	1.87795	Q9NX61	Jklivemem
P62269_95	6.50321	2.46448	P62269	Jklivemem
P14868_24	6.49196	5.74956	P14868	Jklivemem
P50148_145	6.48565	4.30002	P50148	Jklivemem
P14625_563	6.47932	NA	P14625	Jklivemem
Q92922_683	6.47332	NA	Q92922	Jklivemem
P63272_85	6.47229	6.94858	P63272	Jklivemem
P38919_205	6.47089	2.58025	P38919	Jklivemem
P49005_32	6.45764	8.4222	P49005	Jklivemem
P34897_100	6.453	5.94745	P34897	Jklivemem
P61981_107	6.44683	0	P61981	Jklivemem
P33991_714	6.44316	3.56003	P33991	Jklivemem
P09211_199	6.44292	7.77243	P09211	Jklivemem
O00148_265	6.44279	NA	O00148	Jklivemem
P62318_28	6.4308	3.99128	P62318	Jklivemem
P04406_276	6.42138	7.54829	P04406	Jklivemem
P62826_146	6.42075	4.23919	P62826	Jklivemem
Q15800_39	6.42048	3.98111	Q15800	Jklivemem
P62888_74	6.41087	1.62087	P62888	Jklivemem
Q04446_657	6.41077	3.85605	Q04446	Jklivemem
P63092_360	6.40403	3.72044	P63092	Jklivemem
Q5JWF2_1003	6.40403	3.72044	Q5JWF2	Jklivemem
O00148_264	6.40222	3.2587	O00148	Jklivemem
O60701_309	6.39617	NA	O60701	Jklivemem
P07814_371	6.39471	5.39461	P07814	Jklivemem
Q92544_477	6.38541	7.16115	Q92544	Jklivemem
P10809_385	6.36489	4.5621	P10809	Jklivemem
Q9C0E8_262	6.3462	1.72408	Q9C0E8	Jklivemem
Q9BUT1_49	6.3445	1.93332	Q9BUT1	Jklivemem
P50990_242	6.33283	NA	P50990	Jklivemem
P43034_394	6.32365	NA	P43034	Jklivemem
P38159_272	6.30681	3.42881	P38159	Jklivemem
P55084_71	6.30475	7.96334	P55084	Jklivemem
P23246_488	6.29784	NA	P23246	Jklivemem
Q92499_65	6.28613	2.99953	Q92499	Jklivemem
Q92974_434	6.28524	9.2185	Q92974	Jklivemem
P23526_39	6.28315	1.08304	P23526	Jklivemem
P55060_682	6.28111	8.75646	P55060	Jklivemem
O95747_227	6.27731	NA	O95747	Jklivemem
Q13838_362	6.26399	NA	Q13838	Jklivemem
P25685_31	6.25448	3.84401	P25685	Jklivemem
Q15067_256	6.25117	4.97008	Q15067	Jklivemem
P78371_456	6.25088	2.17879	P78371	Jklivemem
Q9Y512_444	6.24629	3.38583	Q9Y512	Jklivemem
P62333_132	6.24342	1.15625	P62333	Jklivemem
P14866_406	6.24303	5.27656	P14866	Jklivemem
O43292_122	6.23727	0.301903	O43292	Jklivemem
[truncated: 1,386 more rows]

## Sheet: Kinase_sites_Jurkat_live
Probe-modified kinase sites
O60331_71
O60331_72
O95747_227
O95747_229
O95747_295
P00558_11
P00558_131
P00558_133
P00558_141
P00558_15
P00558_156
P00558_161
P00558_191
P00558_192
P00558_196
P00558_199
P00558_267
P00558_275
P00558_279
P00558_30
P00558_323
P00558_324
P00558_332
P00558_353
P00558_382
P00558_388
P00558_406
P00558_41
P00558_75
P00558_76
P00558_91
P00558_97
P04183_61
P05771_209
P05771_35
P05771_515
P05771_518
P06239_192
P06239_209
P06239_394
P06239_441
P06239_470
P06493_181
P06493_270
P06493_286
P14618_105
P14618_115
P14618_135
P14618_136
P14618_148
P14618_151
P14618_161
P14618_162
P14618_175
P14618_186
P14618_188
P14618_247
P14618_256
P14618_261
P14618_266
P14618_270
P14618_305
P14618_311
P14618_322
P14618_337
P14618_367
P14618_370
P14618_390
P14618_433
P14618_466
P14618_498
P14618_62
P14618_66
P14618_83
P14618_89
P16591_714
P17252_195
P17252_209
P17252_232
P17252_285
P17252_29
P17252_316
P17252_35
P17252_504
P17252_512
P17252_515
P17858_386
P17858_395
P17858_677
P19367_346
P19784_308
P22392_67
P23743_22
P23743_240
P23743_544
P23743_623
P23919_151
P24941_236
P24941_237
P27707_204
P27707_207
P27707_210
P28482_263
P30085_86
P36507_101
P36507_187
P36507_233
P41240_64
P41240_67
P41240_97
P43403_164
P43403_292
P43403_372
P43403_506
P49840_355
P52789_398
P52789_401
P54819_147
P54819_181
P54819_62
P55263_77
P68400_182
P68400_307
P78527_1086
P78527_1141
P78527_1147
P78527_115
P78527_117
P78527_1411
P78527_1412
P78527_1437
P78527_1456
P78527_1920
P78527_2004
P78527_2366
P78527_265
P78527_2743
P78527_2746
P78527_2829
P78527_2936
P78527_2965
P78527_3168
P78527_3475
Q00534_257
Q00534_43
Q01813_139
Q01813_15
Q01813_394
Q01813_395
Q01813_567
Q01813_574
Q01813_645
Q01813_688
Q01813_753
Q01813_763
Q02750_97
Q13131_190
Q13131_247
Q13131_398
Q13153_429
Q13177_130
Q13177_235
Q13177_246
Q13177_408
Q13555_231
Q13555_517
Q15118_365
Q16539_103
Q16539_182
Q16539_249
Q16644_263
Q16644_76
Q16774_53
Q53H12_224
Q8NEV1_182
Q8NEV1_307
Q8TBX8_384
Q96KB5_100
Q96KB5_74
Q96S44_60
Q96S44_67
Q99755_77
Q99755_78
Q99986_107
Q99986_113
Q99986_147
Q99986_187
Q99986_188
Q99986_194
Q99986_213
Q99986_214
Q99986_302
Q99986_311
Q99986_314
Q99986_317
Q99986_98
Q9BTU6_362
Q9BTU6_465
Q9HA64_45
Q9P289_336
Q9UIJ7_85
Q9Y6R4_739
P27361_280

## Sheet: ProteinKinases_Kinmap
Protein kinases shown in Kinmap
Q16539	MAPK14
Q16644	MAPKAPK3
Q9Y6R4	MAP3K4
Q13177	PAK2
Q13555	CAMK2G
P06239	LCK
Q15118	PDK1
P16591	FER
Q96KB5	PBK
P05771	PRKCB
P06493	CDK1
P17252	PRKCA
P19784	CSNK2A2
P41240	CSK
P68400	CSNK2A1
P78527	PRKDC
P43403	ZAP70
P28482	MAPK1
Q99986	VRK1
Q13153	PAK1
Q13131	PRKAA1
P24941	CDK2
O95747	OXSR1
P36507	MAP2K2
Q00534	CDK6
Q02750	MAP2K1
Q96S44	TP53RK
P49840	GSK3A
Q9P289	STK26
P27361	MAPK3

## Sheet: NonProteinKinases
TH211-modified kinases not found in Kinmap
P00558	PGK1
P14618	PKM
P23919	DTYMK
Q9UIJ7	AK3
Q16774	GUK1
P23743	DGKA
P27707	DCK
O60331	PIP5K1C
Q99755	PIP5K1A
P04183	TK1
Q8NEV1	CSNK2A3
Q01813	PFKP
Q9BTU6	PI4K2A
P22392	NME2
P55263	ADK
P17858	PFKL
P54819	AK2
P19367	HK1
P52789	HK2
P30085	CMPK1
Q53H12	AGK
Q8TBX8	PIP4K2C
Q9HA64	FN3KRP

## Sheet: probe_domain_analysis
ProRule Domain	Domain Frequency in Data	Frequency in database n(D)	Database probability	Binomial test P value	domain name	(-) Log (P-value)
PRU00041	2	10	0.00821693	0.0409337	C2 domain	3.1958
PRU00191	3	28	0.0230074	0.060288	SH2 domain	2.80862
PRU01084	2	13	0.010682	0.0651887	Hexokinase domain	2.73047
PRU00100	1	4	0.00328677	0.120494	Guanylate kinase-like domain	2.11615
PRU00107	1	5	0.00410846	0.148333	Histidine kinase core domain	1.90829
PRU00781	1	8	0.00657354	0.226798	Phosphatidylinositol phosphate kinase (PIPK) domain	1.4837
PRU00534	1	10	0.00821693	0.275145	FAT domain	1.29046
PRU00226	1	50	0.0410846	1	Zinc finger phorbol-ester/DAG-type	0
PRU00192	1	31	0.0254725	1	Src homology 3 (SH3) domain	0

## Sheet: Reactome_Pathways_All
Analysis Type:	Reactome Pathway Enrichment Test, Hypergeometric Test
ID	Description	GeneRatio	BgRatio	pvalue	geneID	Count
R-HSA-15869	Metabolism of nucleotides	9/50	24/450	0.000454485	132/1633/4831/654364/7083/1841/2987/204/51727	9
R-HSA-68875	Mitotic Prophase	6/50	12/450	0.000772915	5579/5595/5594/983/5578/7443	6
R-HSA-373760	L1CAM interactions	7/50	17/450	0.00112837	5604/5058/5605/5595/1457/5594/1459	7
R-HSA-6798695	Neutrophil degranulation	6/50	14/450	0.00210367	1432/5315/4831/654364/5594/5211	6
R-HSA-6802952	Signaling by BRAF and RAF fusions	6/50	15/450	0.00320868	5604/1445/5605/55750/5595/5594	6
R-HSA-68886	M Phase	8/50	25/450	0.00327621	5579/5595/1457/5594/983/5578/7443/1459	8
R-HSA-499943	Interconversion of nucleotide di- and triphosphates	6/50	16/450	0.00469854	4831/654364/1841/2987/204/51727	6
R-HSA-6802957	Oncogenic MAPK signaling	6/50	16/450	0.00469854	5604/1445/5605/55750/5595/5594	6
R-HSA-5674135	MAP2K and MAPK activation	5/50	12/450	0.00603526	5604/1445/5605/5595/5594	5
R-HSA-6802948	Signaling by high-kinase activity BRAF mutants	5/50	12/450	0.00603526	5604/1445/5605/5595/5594	5
R-HSA-69278	Cell Cycle, Mitotic	11/50	46/450	0.00698547	5579/7083/5595/1021/1457/5594/983/5578/1017/7443/1459	11
R-HSA-1430728	Metabolism	24/50	142/450	0.0074583	3098/132/55750/1633/5315/4831/654364/5230/7083/1841/2987/1457/204/51727/5578/55361/3099/5163/8394/1459/5214/79837/5211/23396	24
R-HSA-70171	Glycolysis	6/50	19/450	0.0122065	3098/5315/5230/3099/5214/5211	6
R-HSA-70326	Glucose metabolism	6/50	19/450	0.0122065	3098/5315/5230/3099/5214/5211	6
R-HSA-212436	Generic Transcription Pathway	13/50	63/450	0.012475	1432/5579/5562/112858/5595/1021/1457/5594/983/818/1017/1459/79837	13
R-HSA-6802946	Signaling by moderate kinase activity BRAF mutants	5/50	14/450	0.01281	5604/1445/5605/5595/5594	5
R-HSA-6802949	Signaling by RAS mutants	5/50	14/450	0.01281	5604/1445/5605/5595/5594	5
R-HSA-6802955	Paradoxical activation of RAF signaling by kinase inactive BRAF	5/50	14/450	0.01281	5604/1445/5605/5595/5594	5
R-HSA-1640170	Cell Cycle	11/50	50/450	0.0136948	5579/7083/5595/1021/1457/5594/983/5578/1017/7443/1459	11
R-HSA-73857	RNA Polymerase II Transcription	13/50	64/450	0.0143273	1432/5579/5562/112858/5595/1021/1457/5594/983/818/1017/1459/79837	13
R-HSA-74160	Gene expression (Transcription)	13/50	65/450	0.0163886	1432/5579/5562/112858/5595/1021/1457/5594/983/818/1017/1459/79837	13
R-HSA-8878171	Transcriptional regulation by RUNX1	4/50	10/450	0.0171588	5579/1021/1457/1459	4
R-HSA-202403	TCR signaling	5/50	15/450	0.0176107	5062/1445/5058/7535/3932	5
R-HSA-5633007	Regulation of TP53 Activity	8/50	34/450	0.0246028	1432/5562/112858/1457/983/1017/1459/79837	8
R-HSA-1483257	Phospholipid metabolism	7/50	28/450	0.0257833	55750/1457/55361/8394/1459/79837/23396	7
R-HSA-1257604	PIP3 activates AKT signaling	9/50	41/450	0.0267028	5595/1457/2931/5594/3932/8394/1459/79837/23396	9
R-HSA-76002	Platelet activation, signaling and aggregation	8/50	35/450	0.0291635	1445/1432/5579/5595/5594/3932/5578/1606	8
R-HSA-6804756	Regulation of TP53 Activity through Phosphorylation	6/50	23/450	0.031901	1432/5562/112858/1457/1017/1459	6
R-HSA-2871796	FCERI mediated MAPK activation	4/50	12/450	0.0341345	5062/5058/5595/5594	4
R-HSA-9006925	Intracellular signaling by second messengers	10/50	50/450	0.0364356	5595/1457/2931/5594/3932/5578/8394/1459/79837/23396	10
R-HSA-109582	Hemostasis	10/50	51/450	0.0414274	1445/1432/5579/5595/5594/3932/5578/1606/1017/50808	10
R-HSA-168256	Immune System	17/50	104/450	0.0428721	5604/5062/1445/5058/1432/5579/5591/5315/4831/654364/7535/5595/5594/3932/818/7867/5211	17
R-HSA-8953897	Cellular responses to external stimuli	8/50	38/450	0.0463349	1432/5562/5595/1021/5594/818/1017/7867	8
R-HSA-3700989	Transcriptional Regulation by TP53	8/50	39/450	0.0533056	1432/5562/112858/1457/983/1017/1459/79837	8
R-HSA-2559583	Cellular Senescence	6/50	26/450	0.0558723	1432/5595/1021/5594/1017/7867	6
R-HSA-392499	Metabolism of proteins	6/50	26/450	0.0558723	5591/1457/2931/983/79672/1459	6
R-HSA-2559580	Oxidative Stress Induced Senescence	5/50	20/450	0.0589187	1432/5595/1021/5594/7867	5
R-HSA-2262752	Cellular responses to stress	7/50	33/450	0.0596408	1432/5595/1021/5594/818/1017/7867	7
R-HSA-168249	Innate Immune System	13/50	77/450	0.0627267	5604/5062/5058/1432/5591/5315/4831/654364/5595/5594/3932/7867/5211	13
R-HSA-5683057	MAPK family signaling cascades	9/50	49/450	0.0763706	5604/5062/1445/5058/5605/5595/5594/983/818	9
R-HSA-198725	Nuclear Events (kinase and transcription factor activation)	3/50	10/450	0.0883943	1432/5595/5594	3
R-HSA-1660499	Synthesis of PIPs at the plasma membrane	4/50	16/450	0.0896566	55361/8394/79837/23396	4
R-HSA-5663205	Infectious disease	4/50	16/450	0.0896566	5604/5062/5605/3932	4
R-HSA-6811558	PI5P, PP2A and IER3 Regulate PI3K/AKT Signaling	6/50	30/450	0.101485	5595/5594/3932/8394/79837/23396	6
R-HSA-388841	Costimulation by the CD28 family	4/50	17/450	0.107861	5062/1445/5058/3932	4
R-HSA-453279	Mitotic G1-G1/S phases	4/50	17/450	0.107861	7083/1021/983/1017	4
R-HSA-422475	Axon guidance	11/50	68/450	0.11145	5604/5062/5058/5605/1432/5595/1457/5594/5578/1459/23396	11
R-HSA-3371556	Cellular response to heat stress	3/50	11/450	0.112254	5595/5594/818	3
R-HSA-5687128	MAPK6/MAPK4 signaling	3/50	11/450	0.112254	5062/5058/983	3
R-HSA-69206	G1/S Transition	3/50	11/450	0.112254	7083/983/1017	3
R-HSA-8878166	Transcriptional regulation by RUNX2	3/50	11/450	0.112254	5595/5594/983	3
R-HSA-5684996	MAPK1/MAPK3 signaling	7/50	39/450	0.126209	5604/1445/5605/5595/5594/983/818	7
R-HSA-199418	Negative regulation of the PI3K/AKT network	6/50	32/450	0.130079	5595/5594/3932/8394/79837/23396	6
R-HSA-4420097	VEGFA-VEGFR2 Pathway	6/50	32/450	0.130079	5062/5058/1432/5579/5578/7867	6
R-HSA-448424	Interleukin-17 signaling	5/50	25/450	0.131397	5604/1432/5595/5594/7867	5
R-HSA-450294	MAP kinase activation	5/50	25/450	0.131397	5604/1432/5595/5594/7867	5
R-HSA-5663202	Diseases of signal transduction	8/50	47/450	0.133369	5604/1445/5605/55750/5595/2931/5594/3932	8
R-HSA-397014	Muscle contraction	3/50	12/450	0.138294	5062/5058/818	3
R-HSA-71387	Metabolism of carbohydrates	6/50	33/450	0.145731	3098/5315/5230/3099/5214/5211	6
R-HSA-194138	Signaling by VEGF	6/50	34/450	0.162233	5062/5058/1432/5579/5578/7867	6
R-HSA-1433557	Signaling by SCF-KIT	3/50	13/450	0.166189	3932/5578/2241	3
R-HSA-450282	MAPK targets/ Nuclear events mediated by MAP kinases	3/50	13/450	0.166189	1432/5595/5594	3
R-HSA-168142	Toll Like Receptor 10 (TLR10) Cascade	5/50	27/450	0.168375	5604/1432/5595/5594/7867	5
R-HSA-168176	Toll Like Receptor 5 (TLR5) Cascade	5/50	27/450	0.168375	5604/1432/5595/5594/7867	5
R-HSA-168181	Toll Like Receptor 7/8 (TLR7/8) Cascade	5/50	27/450	0.168375	5604/1432/5595/5594/7867	5
R-HSA-975138	TRAF6 mediated induction of NFkB and MAP kinases upon TLR7/8 or 9 activation	5/50	27/450	0.168375	5604/1432/5595/5594/7867	5
R-HSA-975155	MyD88 dependent cascade initiated on endosome	5/50	27/450	0.168375	5604/1432/5595/5594/7867	5
R-HSA-975871	MyD88 cascade initiated on plasma membrane	5/50	27/450	0.168375	5604/1432/5595/5594/7867	5
R-HSA-112314	Neurotransmitter receptors and postsynaptic signal transmission	4/50	20/450	0.171271	5579/5594/5578/818	4
R-HSA-187037	Signaling by NTRK1 (TRKA)	4/50	20/450	0.171271	1432/5595/5594/7867	4
R-HSA-112315	Transmission across Chemical Synapses	4/50	21/450	0.194878	5579/5594/5578/818	4
R-HSA-1483255	PI Metabolism	4/50	21/450	0.194878	55361/8394/79837/23396	4
R-HSA-195721	Signaling by WNT	4/50	21/450	0.194878	5579/1457/5578/1459	4
R-HSA-373755	Semaphorin interactions	3/50	14/450	0.19561	5062/5058/23396	3
R-HSA-376176	Signaling by ROBO receptors	3/50	14/450	0.19561	5062/5058/5578	3
R-HSA-1280218	Adaptive Immune System	6/50	36/450	0.197577	5062/1445/5058/5579/7535/3932	6
R-HSA-166058	MyD88:MAL(TIRAP) cascade initiated on plasma membrane	5/50	29/450	0.209072	5604/1432/5595/5594/7867	5
R-HSA-166166	MyD88-independent TLR4 cascade	5/50	29/450	0.209072	5604/1432/5595/5594/7867	5
R-HSA-168138	Toll Like Receptor 9 (TLR9) Cascade	5/50	29/450	0.209072	5604/1432/5595/5594/7867	5
R-HSA-168164	Toll Like Receptor 3 (TLR3) Cascade	5/50	29/450	0.209072	5604/1432/5595/5594/7867	5
R-HSA-168179	Toll Like Receptor TLR1:TLR2 Cascade	5/50	29/450	0.209072	5604/1432/5595/5594/7867	5
R-HSA-168188	Toll Like Receptor TLR6:TLR2 Cascade	5/50	29/450	0.209072	5604/1432/5595/5594/7867	5
R-HSA-181438	Toll Like Receptor 2 (TLR2) Cascade	5/50	29/450	0.209072	5604/1432/5595/5594/7867	5
R-HSA-937061	TRIF(TICAM1)-mediated TLR4 signaling	5/50	29/450	0.209072	5604/1432/5595/5594/7867	5
R-HSA-5673001	RAF/MAP kinase cascade	6/50	37/450	0.216304	5604/1445/5605/5595/5594/818	6
R-HSA-112316	Neuronal System	4/50	22/450	0.219467	5579/5594/5578/818	4
R-HSA-68877	Mitotic Prometaphase	3/50	15/450	0.226234	1457/983/1459	3
R-HSA-9006934	Signaling by Receptor Tyrosine Kinases	11/50	78/450	0.228937	5062/1445/5058/1432/5579/5595/5594/3932/5578/7867/2241	11
R-HSA-1643685	Disease	10/50	70/450	0.232388	5604/5062/1445/5605/3098/55750/5595/2931/5594/3932	10
R-HSA-166520	Signaling by NTRKs	4/50	23/450	0.244879	1432/5595/5594/7867	4
R-HSA-389356	CD28 co-stimulation	3/50	16/450	0.257752	5062/5058/3932	3
R-HSA-2454202	Fc epsilon receptor (FCERI) signaling	4/50	24/450	0.270954	5062/5058/5595/5594	4
R-HSA-1266738	Developmental Biology	11/50	81/450	0.272063	5604/5062/5058/5605/1432/5595/1457/5594/5578/1459/23396	11
R-HSA-556833	Metabolism of lipids	7/50	48/450	0.274152	55750/1457/55361/8394/1459/79837/23396	7
R-HSA-162582	Signal Transduction	25/50	203/450	0.278215	5604/5062/1445/5058/5605/1432/5579/5562/5595/1457/2931/5594/983/3932/5578/1606/818/1017/7867/2241/5163/8394/1459/79837/23396	25
R-HSA-8953854	Metabolism of RNA	3/50	17/450	0.289872	1432/112858/5578	3
R-HSA-166016	Toll Like Receptor 4 (TLR4) Cascade	5/50	33/450	0.298645	5604/1432/5595/5594/7867	5
R-HSA-111885	Opioid Signalling	2/50	10/450	0.30711	5594/5578	2
R-HSA-190236	Signaling by FGFR	2/50	10/450	0.30711	5595/5594	2
R-HSA-5621575	CD209 (DC-SIGN) signaling	2/50	10/450	0.30711	5062/5058	2
R-HSA-5673000	RAF activation	2/50	10/450	0.30711	5604/5605	2
R-HSA-6804757	Regulation of TP53 Degradation	2/50	10/450	0.30711	983/1017	2
R-HSA-6806003	Regulation of TP53 Expression and Degradation	2/50	10/450	0.30711	983/1017	2
R-HSA-983231	Factors involved in megakaryocyte development and platelet production	2/50	10/450	0.30711	1017/50808	2
R-HSA-449147	Signaling by Interleukins	7/50	50/450	0.31251	5604/5062/1432/5595/5594/3932/7867	7
R-HSA-2029480	Fcgamma receptor (FCGR) dependent phagocytosis	3/50	18/450	0.322323	5058/5595/5594	3
R-HSA-195258	RHO GTPase Effectors	4/50	26/450	0.324474	5062/5058/5595/5594	4
R-HSA-1280215	Cytokine Signaling in Immune system	8/50	59/450	0.324786	5604/5062/1432/5595/5594/3932/818/7867	8
R-HSA-168898	Toll-like Receptor Cascades	5/50	35/450	0.345936	5604/1432/5595/5594/7867	5
R-HSA-201681	TCF dependent signaling in response to WNT	2/50	11/450	0.350411	1457/1459	2
R-HSA-373752	Netrin-1 signaling	2/50	11/450	0.350411	5058/1432	2
R-HSA-3858494	Beta-catenin independent WNT signaling	2/50	11/450	0.350411	5579/5578	2
R-HSA-73894	DNA Repair	2/50	11/450	0.350411	5591/1017	2
R-HSA-416476	G alpha (q) signalling events	4/50	27/450	0.351622	5595/5594/5578/1606	4
R-HSA-597592	Post-translational protein modification	3/50	20/450	0.387256	5591/983/79672	3
R-HSA-442742	CREB phosphorylation through the activation of Ras	2/50	12/450	0.392834	5594/818	2
R-HSA-913531	Interferon Signaling	2/50	12/450	0.392834	5595/818	2
R-HSA-194315	Signaling by Rho GTPases	4/50	30/450	0.432991	5062/5058/5595/5594	4
R-HSA-418594	G alpha (i) signalling events	2/50	14/450	0.473781	5594/5578	2
R-HSA-69620	Cell Cycle Checkpoints	2/50	14/450	0.473781	983/1017	2
R-HSA-74751	Insulin receptor signalling cascade	2/50	14/450	0.473781	5595/5594	2
R-HSA-74752	Signaling by Insulin receptor	2/50	14/450	0.473781	5595/5594	2
R-HSA-1852241	Organelle biogenesis and maintenance	2/50	15/450	0.511865	1432/983	2
R-HSA-109581	Apoptosis	2/50	16/450	0.548167	5062/51765	2
R-HSA-453274	Mitotic G2-G2/M phases	2/50	16/450	0.548167	983/1017	2
R-HSA-69275	G2/M Transition	2/50	16/450	0.548167	983/1017	2
R-HSA-438064	Post NMDA receptor activation events	2/50	17/450	0.582607	5594/818	2
R-HSA-442755	Activation of NMDA receptors and postsynaptic events	2/50	17/450	0.582607	5594/818	2
R-HSA-5357801	Programmed Cell Death	2/50	17/450	0.582607	5062/51765	2
R-HSA-5621481	C-type lectin receptors (CLRs)	2/50	18/450	0.615142	5062/5058	2
R-HSA-372790	Signaling by GPCR	5/50	47/450	0.620627	5579/5595/5594/5578/1606	5
R-HSA-388396	GPCR downstream signalling	5/50	47/450	0.620627	5579/5595/5594/5578/1606	5
R-HSA-168638	NOD1/2 Signaling Pathway	1/50	10/450	0.695937	1432	1
R-HSA-168643	Nucleotide-binding domain, leucine rich repeat containing receptor (NLR) signaling pathways	1/50	10/450	0.695937	1432	1
R-HSA-389357	CD28 dependent PI3K/Akt signaling	1/50	10/450	0.695937	3932	1
R-HSA-5617833	Cilium Assembly	1/50	10/450	0.695937	983	1
R-HSA-5620912	Anchoring of the basal body to the plasma membrane	1/50	10/450	0.695937	983	1
R-HSA-8848021	Signaling by PTK6	1/50	10/450	0.695937	1017	1
R-HSA-8853659	RET signaling	1/50	10/450	0.695937	5578	1
R-HSA-9006927	Signaling by Non-Receptor Tyrosine Kinases	1/50	10/450	0.695937	1017	1
R-HSA-983705	Signaling by the B Cell Receptor (BCR)	1/50	10/450	0.695937	5579	1
R-HSA-380270	Recruitment of mitotic centrosome proteins and complexes	1/50	11/450	0.73049	983	1
R-HSA-380287	Centrosome maturation	1/50	11/450	0.73049	983	1
R-HSA-8986944	Transcriptional Regulation by MECP2	1/50	11/450	0.73049	818	1
R-HSA-9020702	Interleukin-1 signaling	1/50	12/450	0.761186	5604	1
R-HSA-2682334	EPH-Ephrin signaling	2/50	26/450	0.809821	5062/5058	2
R-HSA-114508	Effects of PIP2 hydrolysis	1/50	14/450	0.812653	1606	1
R-HSA-199991	Membrane Trafficking	1/50	14/450	0.812653	23396	1
R-HSA-446652	Interleukin-1 family signaling	1/50	14/450	0.812653	5604	1
R-HSA-5653656	Vesicle-mediated transport	1/50	14/450	0.812653	23396	1
R-HSA-2219528	PI3K/AKT Signaling in Cancer	2/50	27/450	0.826879	2931/3932	2
R-HSA-3928662	EPHB-mediated forward signaling	1/50	15/450	0.834137	5058	1
R-HSA-1227986	Signaling by ERBB2	1/50	16/450	0.853202	5578	1
R-HSA-983712	Ion channel transport	1/50	17/450	0.870114	818	1
R-HSA-2219530	Constitutive Signaling by Aberrant PI3K in Cancer	1/50	18/450	0.885113	3932	1
R-HSA-382551	Transport of small molecules	1/50	20/450	0.910195	818	1

[truncated: 1 more sheets: Reactome_Pathways_nPK]
